# Supplementary material for: Identification of determinants of differential chromatin accessibility through a massively parallel genome-integrated reporter assay
Source: Genome Res. 2020 Oct;30(10):1468–80. doi: 10.1101/gr.263228.120 (PMC7605270; doi:10.1101/gr.263228.120)
Supplement: Supplemental Material [file supp_gr.263228.120_GSE145920_phrase_libraries_raw_counts.xlsx]

## Sheet: KMAC only Library ESC DE
full.phrase	phrase	category	category-name	Used in Hammelman et al.	description	dpni.es1	dpni.es2	dpni.endo1	dpni.endo2	dpni.es3	dpni.es4	dpni.neuro1	dpni.neuro2	dpnii.es1	dpnii.es2	dpnii.endo1	dpnii.endo2	dpnii.es3	dpnii.es4
ATCGAAAGGATGGGAGTACTAAGCTCCGCTGTCTCGCGCACCACTAGGTGGCGCCCTCTTGTGGGCGGAAACGCCGCACTTCCGCTGTCTCGCGCACCACTAGGTGGCGCCACTAGAGGGCGCCAGTCAGCACGGACAAAGTACTGAGAT	CCGCTGTCTCGCGCACCACTAGGTGGCGCCCTCTTGTGGGCGGAAACGCCGCACTTCCGCTGTCTCGCGCACCACTAGGTGGCGCCACTAGAGGGCGCCA	cat1	universal open	N	16.3111	1010	1277	427	1094	2174	2203	1852	2388	5919	4428	3230	5339	6472	7154
ATCGAAAGGATGGGAGTACTAAGCTGAAAACGTTCGCGCACCACTAGGTGGCGCCCTCTTGTGGGCGGAAACGCCGCACTTCCGCTGTCTCGCGCACCACTAGGTGGCGCCACTAGAGGGCGCCAGTCAGCACGGACAAAGTACTGAGAT	GAAAACGTTCGCGCACCACTAGGTGGCGCCCTCTTGTGGGCGGAAACGCCGCACTTCCGCTGTCTCGCGCACCACTAGGTGGCGCCACTAGAGGGCGCCA	cat1	universal open	N	15.5307	2274	2700	2196	2603	1812	1701	1137	2514	14575	11475	13653	17333	6583	6040
ATCGAAAGGATGGGAGTACTAAGCTTTCCGCTGTCTCGCGCACCACTAGGTGGCGCCCTCTTGTGGGCGGAAACGCCGCACTTCCGGAAGTCCCGCCTAACGCGACTAGCGCCACTAGAGGGCGCGTCAGCACGGACAAAGTACTGAGAT	TTCCGCTGTCTCGCGCACCACTAGGTGGCGCCCTCTTGTGGGCGGAAACGCCGCACTTCCGGAAGTCCCGCCTAACGCGACTAGCGCCACTAGAGGGCGC	cat1	universal open	N	15.0964	882	1087	725	969	2054	1996	2592	2864	5208	4490	4179	5336	8117	7421
ATCGAAAGGATGGGAGTACTAAGCTCCACTAGGTGGCGCTAGGCGGAAACGCCGCACTTCCGGCAACAACCGCCTAACGCGAAAACGTTCGCGCACCACTAGGTGGCGCCACTAGAGGGCGGGGCGTCAGCACGGACAAAGTACTGAGAT	CCACTAGGTGGCGCTAGGCGGAAACGCCGCACTTCCGGCAACAACCGCCTAACGCGAAAACGTTCGCGCACCACTAGGTGGCGCCACTAGAGGGCGGGGC	cat1	universal open	N	14.3006	691	851	432	741	1751	1921	2059	3887	3625	2370	1742	2777	7111	7143
ATCGAAAGGATGGGAGTACTAAGCTGCACCACTAGGTGGCGCTAGGCCACGCCCTCTTGTGGGCGGAAACGCCGCACTTCCGCTGTCTCGCGCACCACTAGGTGGCGCCCTCTTGTGGGCGGAGTGTCAGCACGGACAAAGTACTGAGAT	GCACCACTAGGTGGCGCTAGGCCACGCCCTCTTGTGGGCGGAAACGCCGCACTTCCGCTGTCTCGCGCACCACTAGGTGGCGCCCTCTTGTGGGCGGAGT	cat1	universal open	N	13.7007	3369	3810	1696	2883	3571	4022	2733	4256	15589	11906	12457	12711	14077	14578
ATCGAAAGGATGGGAGTACTAAGCTCACCACTAGGTGGCGCTAGGCGGAAACGCCGCACTTCCGCTGTCTCGCGCACCACTAGGTGGCGCCCTCTTGTGGGCGGAAACGCCGCACTTCCGCCCACGTCAGCACGGACAAAGTACTGAGAT	CACCACTAGGTGGCGCTAGGCGGAAACGCCGCACTTCCGCTGTCTCGCGCACCACTAGGTGGCGCCCTCTTGTGGGCGGAAACGCCGCACTTCCGCCCAC	cat1	universal open	N	13.672	1762	2366	1733	1443	3235	3809	5521	4334	12071	9691	13371	9839	18951	19208
ATCGAAAGGATGGGAGTACTAAGCTTTCGCGCACCACTAGGTGGCGCCCTCTTGTGGGCGGAAACGCCGCACTTCCGGCAACAACCGCCTCTCGCGAGTAAAAGGGGCGGAAGTCCCGCCCTCTTGTCAGCACGGACAAAGTACTGAGAT	TTCGCGCACCACTAGGTGGCGCCCTCTTGTGGGCGGAAACGCCGCACTTCCGGCAACAACCGCCTCTCGCGAGTAAAAGGGGCGGAAGTCCCGCCCTCTT	cat1	universal open	N	13.3439	575	447	671	457	1323	1501	1016	1484	5176	4956	3299	4246	6880	7683
ATCGAAAGGATGGGAGTACTAAGCTAGTCCGAACGCCGGAAGTCCCGCCTCTCGCGACTAGCGCCACTAGAGGGCGGAAACGCCGCACTTCCGCTGTCTCGCGCACCACTAGGTGGCGCCACCTGGTCAGCACGGACAAAGTACTGAGAT	AGTCCGAACGCCGGAAGTCCCGCCTCTCGCGACTAGCGCCACTAGAGGGCGGAAACGCCGCACTTCCGCTGTCTCGCGCACCACTAGGTGGCGCCACCTG	cat1	universal open	N	13.29	2107	1608	2020	3381	4089	3961	8585	9378	7908	6305	5789	9308	17392	15214
ATCGAAAGGATGGGAGTACTAAGCTCCACTAGGTGGCGCCCTCTTGTGGGCGGAAACGCCGCACTTCCGCCCAAGGACAAAGGGCGGAAACGCCGCACTTCCGCCTCTCGCGAAACCGGAAGTTCGTCAGCACGGACAAAGTACTGAGAT	CCACTAGGTGGCGCCCTCTTGTGGGCGGAAACGCCGCACTTCCGCCCAAGGACAAAGGGCGGAAACGCCGCACTTCCGCCTCTCGCGAAACCGGAAGTTC	cat1	universal open	N	13.0896	1137	815	812	765	2448	2449	3802	2908	4695	3686	2787	3840	10313	10923
ATCGAAAGGATGGGAGTACTAAGCTCCACTAGGTGGCGCTAGGCGGAGACCACGCCCTCTTGTGGGCGGAAACGCCGCACTTCCGGCAACAACCGCTAGGCCACGCCCTCTTGTGGGCGGAGCAAGTCAGCACGGACAAAGTACTGAGAT	CCACTAGGTGGCGCTAGGCGGAGACCACGCCCTCTTGTGGGCGGAAACGCCGCACTTCCGGCAACAACCGCTAGGCCACGCCCTCTTGTGGGCGGAGCAA	cat1	universal open	N	13.029	856	882	540	950	1454	1386	841	1408	6092	5329	7874	5362	5491	6681
ATCGAAAGGATGGGAGTACTAAGCTCGCACCACTAGGTGGCGCCCTCTTGTGGGCGGAAACGCCGCACTTCCGCTGTCTCGCGCACCACTAGGTGGCGCTAGGCCACGCCCTCTTGTGGGCGGGTGTCAGCACGGACAAAGTACTGAGAT	CGCACCACTAGGTGGCGCCCTCTTGTGGGCGGAAACGCCGCACTTCCGCTGTCTCGCGCACCACTAGGTGGCGCTAGGCCACGCCCTCTTGTGGGCGGGT	cat1	universal open	N	12.8672	2648	2759	2377	1673	4721	4436	3809	4541	12440	9225	13256	7082	20300	20261
ATCGAAAGGATGGGAGTACTAAGCTGCTAGGCGGAAACGCCGCACTTCCGCTGTCTCGCGCACCACTAGGTGGCGCCCTCTTGTGGGCGGAAACGCCGCACTTCCGCCCTCTTGTGGGCGGGGTGGTCAGCACGGACAAAGTACTGAGAT	GCTAGGCGGAAACGCCGCACTTCCGCTGTCTCGCGCACCACTAGGTGGCGCCCTCTTGTGGGCGGAAACGCCGCACTTCCGCCCTCTTGTGGGCGGGGTG	cat1	universal open	N	12.8491	4562	4285	6062	5517	3105	3112	3708	4193	17388	14019	20555	14945	12419	14622
ATCGAAAGGATGGGAGTACTAAGCTTCCGCTGTCTCGCGCACCACTAGGTGGCGCCACTAGAGGGCGGAAACGCCGCACTTCCGCTGTCTCGCGCACCACTAGGTGGCGCCACTAGATGGCGGCCGTCAGCACGGACAAAGTACTGAGAT	TCCGCTGTCTCGCGCACCACTAGGTGGCGCCACTAGAGGGCGGAAACGCCGCACTTCCGCTGTCTCGCGCACCACTAGGTGGCGCCACTAGATGGCGGCC	cat1	universal open	N	12.7096	1160	1263	952	1520	2324	2569	1898	3495	6594	4507	5106	8346	7164	8622
ATCGAAAGGATGGGAGTACTAAGCTCTAGGTGGCGCCACTAGAGGGCGGAAACGCCGCACTTCCGCCCAAGGACAAAGGGCGGAAACGCCGCACTTCCGCTGTCTCGCGCACCACTAGGTGGCGCGTCAGCACGGACAAAGTACTGAGAT	CTAGGTGGCGCCACTAGAGGGCGGAAACGCCGCACTTCCGCCCAAGGACAAAGGGCGGAAACGCCGCACTTCCGCTGTCTCGCGCACCACTAGGTGGCGC	cat1	universal open	N	12.6858	722	877	769	1133	1536	1467	1588	2368	5630	4390	3234	5516	6764	6346
ATCGAAAGGATGGGAGTACTAAGCTTTCCGCTGTCTCGCGCACCACTAGGTGGCGCTAGGCGGAAACGCCGCACTTCCGCTGTCTCGCGCACCACTAGGTGGCGCCCTCTTGTGGGCGGAAGTGAGTCAGCACGGACAAAGTACTGAGAT	TTCCGCTGTCTCGCGCACCACTAGGTGGCGCTAGGCGGAAACGCCGCACTTCCGCTGTCTCGCGCACCACTAGGTGGCGCCCTCTTGTGGGCGGAAGTGA	cat1	universal open	N	12.6361	2452	1913	2183	1860	2323	2833	2037	2439	11720	8885	8625	10386	8548	9242
ATCGAAAGGATGGGAGTACTAAGCTCGACTAGCGCCACTAGAGGGCGGAAACGCCGCACTTCCGCTGTCTCGCGCACCACTAGGTGGCGCTAGGCGGAAACGCCGCACTTCCGGAAGTCCCGCCCGTCAGCACGGACAAAGTACTGAGAT	CGACTAGCGCCACTAGAGGGCGGAAACGCCGCACTTCCGCTGTCTCGCGCACCACTAGGTGGCGCTAGGCGGAAACGCCGCACTTCCGGAAGTCCCGCCC	cat1	universal open	N	12.4937	1431	1310	1638	1501	2535	2461	2490	3255	10478	7603	8321	7248	12620	13192
ATCGAAAGGATGGGAGTACTAAGCTTAAATTTCGCGCACCACTAGGTGGCGCTAGGCGGAAACGCCGCACTTCCGCTTCCGGCAACAACCGCCTCTCGCGACTAGCGCCACTAGAGGGCGGAGCGGTCAGCACGGACAAAGTACTGAGAT	TAAATTTCGCGCACCACTAGGTGGCGCTAGGCGGAAACGCCGCACTTCCGCTTCCGGCAACAACCGCCTCTCGCGACTAGCGCCACTAGAGGGCGGAGCG	cat1	universal open	N	12.2256	392	473	142	547	972	1229	596	1315	2244	2368	4657	4190	2614	2985
ATCGAAAGGATGGGAGTACTAAGCTCTAGGTGGCGCCACTAGAGGGCGGAAACGCCGCACTTCCGGCAACAACCGCTAGGCGGAAACGCCGCACTTCCGCTGTCTCGCGCACCACTAGGTGGCGCGTCAGCACGGACAAAGTACTGAGAT	CTAGGTGGCGCCACTAGAGGGCGGAAACGCCGCACTTCCGGCAACAACCGCTAGGCGGAAACGCCGCACTTCCGCTGTCTCGCGCACCACTAGGTGGCGC	cat1	universal open	N	11.9821	1171	1221	1772	1902	1818	1957	907	1124	6817	5123	5553	4155	5693	5240
ATCGAAAGGATGGGAGTACTAAGCTCCTAACGCGACTAGCGCCACTAGAGGGCGGAAACGCCGCACTTCCGCCAGAAGAGGGCGGAAACGCCGCACTTCCGGCAACAACCGCCTCTCGCGAGAACGTCAGCACGGACAAAGTACTGAGAT	CCTAACGCGACTAGCGCCACTAGAGGGCGGAAACGCCGCACTTCCGCCAGAAGAGGGCGGAAACGCCGCACTTCCGGCAACAACCGCCTCTCGCGAGAAC	cat1	universal open	N	11.8525	1145	907	694	452	2279	2295	4773	4500	6071	3675	4438	3920	10651	11044
ATCGAAAGGATGGGAGTACTAAGCTCGCACTTCCGGCAACAACCGCTAGGCGGAAACGCCGCACTTCCGCCTCTCGCGACTAGCGCCCTCTTGTGGGCGGAGACCACGCCCTCTTGTGGGCGGAGGTCAGCACGGACAAAGTACTGAGAT	CGCACTTCCGGCAACAACCGCTAGGCGGAAACGCCGCACTTCCGCCTCTCGCGACTAGCGCCCTCTTGTGGGCGGAGACCACGCCCTCTTGTGGGCGGAG	cat1	universal open	N	11.7997	3548	3653	1930	3742	3743	3447	3991	4531	14934	12758	11462	15354	17729	16694
ATCGAAAGGATGGGAGTACTAAGCTCCACTAGGTGGCGCCACTAGAGGGCGGAAACGCCGCACTTCCGCTGTCTCGCGCACCACTAGGTGGCGCTACGCAAAACAAGCCCCGCCTCTCGCGAAGCGTCAGCACGGACAAAGTACTGAGAT	CCACTAGGTGGCGCCACTAGAGGGCGGAAACGCCGCACTTCCGCTGTCTCGCGCACCACTAGGTGGCGCTACGCAAAACAAGCCCCGCCTCTCGCGAAGC	cat1	universal open	N	11.7956	929	1028	242	571	2073	1720	1834	2400	6234	4997	4597	2701	7812	7911
ATCGAAAGGATGGGAGTACTAAGCTCGCGCACCACTAGGTGGCGCTAAACCGCGTTTAAATTTCGCGCACCACTAGGTGGCGCCACTAGAGGGCGGAAACGCCGCACTTCCGCCTCTCGCGAGCCGTCAGCACGGACAAAGTACTGAGAT	CGCGCACCACTAGGTGGCGCTAAACCGCGTTTAAATTTCGCGCACCACTAGGTGGCGCCACTAGAGGGCGGAAACGCCGCACTTCCGCCTCTCGCGAGCC	cat1	universal open	N	11.6993	1390	1642	1296	2031	2495	2356	2380	2905	11277	8755	13401	15934	8353	8817
ATCGAAAGGATGGGAGTACTAAGCTTCCGCTGTCTCGCGCACCACTAGGTGGCGCTAGGCGGAAACGCCGCACTTCCGGAAGTCCCGCCTCTCGCGAAACCGGAAGTCCCGCCTAACGCGAATGAGTCAGCACGGACAAAGTACTGAGAT	TCCGCTGTCTCGCGCACCACTAGGTGGCGCTAGGCGGAAACGCCGCACTTCCGGAAGTCCCGCCTCTCGCGAAACCGGAAGTCCCGCCTAACGCGAATGA	cat1	universal open	N	11.6519	923	667	721	876	1242	1367	1052	1798	5962	5049	6210	8193	4913	5886
ATCGAAAGGATGGGAGTACTAAGCTGCGCACCACTAGGTGGCGCTAAACCGCGAAACCGGAAGTCCCGCCAGAAGAGGGCGGAAACGCCGCACTTCCGCCTCTCGCGAGTAAAAGGGGCGGGTCTGTCAGCACGGACAAAGTACTGAGAT	GCGCACCACTAGGTGGCGCTAAACCGCGAAACCGGAAGTCCCGCCAGAAGAGGGCGGAAACGCCGCACTTCCGCCTCTCGCGAGTAAAAGGGGCGGGTCT	cat1	universal open	N	11.6285	979	807	446	1005	900	960	858	1193	5595	3784	2216	7561	4637	4682
ATCGAAAGGATGGGAGTACTAAGCTCGCACCACTAGGTGGCGCCACTAGAGGGCGGAAACGCCGCACTTCCGCTTCCGGCAACAACCGCTAGGCGGAAACGCCGCACTTCCGCCTCTCGCGAGGAGTCAGCACGGACAAAGTACTGAGAT	CGCACCACTAGGTGGCGCCACTAGAGGGCGGAAACGCCGCACTTCCGCTTCCGGCAACAACCGCTAGGCGGAAACGCCGCACTTCCGCCTCTCGCGAGGA	cat1	universal open	N	11.6214	2047	1673	1120	1698	2438	2820	1899	3663	9863	7936	10932	9442	11592	12127
ATCGAAAGGATGGGAGTACTAAGCTCCACTAGGTGGCGCCACTAGAGGGCGGAAACGCCGCACTTCCGGCAACAACCGCTAGGCGGAAACGCCGCACTTCCGGCAACAACCGCCTCTCGCGAGTGGTCAGCACGGACAAAGTACTGAGAT	CCACTAGGTGGCGCCACTAGAGGGCGGAAACGCCGCACTTCCGGCAACAACCGCTAGGCGGAAACGCCGCACTTCCGGCAACAACCGCCTCTCGCGAGTG	cat1	universal open	N	11.6057	1825	1657	906	1009	2189	2002	2771	2904	8106	7333	8976	8992	7631	7672
ATCGAAAGGATGGGAGTACTAAGCTACTTCCGCTGTCTCGCGCACCACTAGGTGGCGCTAGGCGGAAACGCCGCACTTCCGCTGTCTCGCGCACCACTAGGTGGCGCCCTCTTGTGGGCGGGGTAGTCAGCACGGACAAAGTACTGAGAT	ACTTCCGCTGTCTCGCGCACCACTAGGTGGCGCTAGGCGGAAACGCCGCACTTCCGCTGTCTCGCGCACCACTAGGTGGCGCCCTCTTGTGGGCGGGGTA	cat1	universal open	N	11.5231	3087	2703	2995	4189	2724	2715	2561	3530	12663	10465	15124	13957	11646	13849
ATCGAAAGGATGGGAGTACTAAGCTCGCACCACTAGGTGGCGCTAGGCGGAAACGCCGCACTTCCGCCTCTCGCGAAAACGTTCGCGCACCACTAGGTGGCGCTAGGCGGAGACCACGCCCTCTCGTCAGCACGGACAAAGTACTGAGAT	CGCACCACTAGGTGGCGCTAGGCGGAAACGCCGCACTTCCGCCTCTCGCGAAAACGTTCGCGCACCACTAGGTGGCGCTAGGCGGAGACCACGCCCTCTC	cat1	universal open	N	11.5043	2498	2274	1986	1647	2786	2885	2000	3753	8759	7158	7835	7067	11263	11276
ATCGAAAGGATGGGAGTACTAAGCTGTCTCGCGCACCACTAGGTGGCGCCACTAGAGGGCGGAAACGCCGCACTTCCGCTGTCTCGCGCACCACTAGGTGGCGCTAAACCGCGAAACCGGAAGCTGTCAGCACGGACAAAGTACTGAGAT	GTCTCGCGCACCACTAGGTGGCGCCACTAGAGGGCGGAAACGCCGCACTTCCGCTGTCTCGCGCACCACTAGGTGGCGCTAAACCGCGAAACCGGAAGCT	cat1	universal open	N	11.4253	1413	1252	1777	1157	2155	2412	3677	3961	6650	5841	10887	7655	8604	9029
ATCGAAAGGATGGGAGTACTAAGCTCTAGCGCCACTAGAGGGCGGAAACGCCGCACTTCCGGCAACAACCGCTAGGCCACGCCCTCTTGTGGGCGGAAACGCCGCACTTCCGCCTCTCGCGAGTGGTCAGCACGGACAAAGTACTGAGAT	CTAGCGCCACTAGAGGGCGGAAACGCCGCACTTCCGGCAACAACCGCTAGGCCACGCCCTCTTGTGGGCGGAAACGCCGCACTTCCGCCTCTCGCGAGTG	cat1	universal open	N	11.2706	2115	2349	2175	1523	2627	2657	1157	2297	13685	11104	14453	12350	10426	10799
ATCGAAAGGATGGGAGTACTAAGCTGCGCACCACTAGGTGGCGCTAAACCGCGTTTAAATTTCGCGCACCACTAGGTGGCGCCCTCTTGTGGGCGGAAACGCCGCACTTCCGCCTCTCGCGATAGGTCAGCACGGACAAAGTACTGAGAT	GCGCACCACTAGGTGGCGCTAAACCGCGTTTAAATTTCGCGCACCACTAGGTGGCGCCCTCTTGTGGGCGGAAACGCCGCACTTCCGCCTCTCGCGATAG	cat1	universal open	N	11.2554	2066	1867	1396	1526	2686	2923	2611	2958	9786	7388	5963	10962	9015	9922
ATCGAAAGGATGGGAGTACTAAGCTCACTTCCGCCAGAAGAGGGCGGAAGTCCCGCCAGAAGAGGGCGGAAACGCCGCACTTCCGCTTCCGGCAACAACCGCCCAAGGACAAAGGGCGGAAGTGCGTCAGCACGGACAAAGTACTGAGAT	CACTTCCGCCAGAAGAGGGCGGAAGTCCCGCCAGAAGAGGGCGGAAACGCCGCACTTCCGCTTCCGGCAACAACCGCCCAAGGACAAAGGGCGGAAGTGC	cat1	universal open	N	11.058	420	815	536	888	722	563	562	928	3075	2047	1769	3390	1924	1657
ATCGAAAGGATGGGAGTACTAAGCTGCTAGGCGGAGACCACGCCCTCTTGTGGGCGGAAACGCCGCACTTCCGCCTAACGCGACTAGCGCCCTCTTGTGGGCGGAAACGCCGCACTTCCGCCCATGTCAGCACGGACAAAGTACTGAGAT	GCTAGGCGGAGACCACGCCCTCTTGTGGGCGGAAACGCCGCACTTCCGCCTAACGCGACTAGCGCCCTCTTGTGGGCGGAAACGCCGCACTTCCGCCCAT	cat1	universal open	N	11.0425	1209	1899	558	956	2885	2720	3400	5904	8491	5909	5641	4197	16526	15713
ATCGAAAGGATGGGAGTACTAAGCTACTAGCGCCCTCTTGTGGGCGGAAACGCCGCACTTCCGCCTAACGCGACTAGCGCCACTAGAGGGCGGAAACGCCGCACTTCCGGCAACAACCGCCTACGGTCAGCACGGACAAAGTACTGAGAT	ACTAGCGCCCTCTTGTGGGCGGAAACGCCGCACTTCCGCCTAACGCGACTAGCGCCACTAGAGGGCGGAAACGCCGCACTTCCGGCAACAACCGCCTACG	cat1	universal open	N	10.926	559	944	1005	1468	1798	1925	2239	2536	5087	3748	4075	6099	9569	9620
ATCGAAAGGATGGGAGTACTAAGCTCCACTAGGTGGCGCTAGGCGGAAACGCCGCACTTCCGCCAGAAGAGGGCGGAAACGCCGCACTTCCGCTTCCGGCAACAACCGCTAGGCCACGCCCCCTGGTCAGCACGGACAAAGTACTGAGAT	CCACTAGGTGGCGCTAGGCGGAAACGCCGCACTTCCGCCAGAAGAGGGCGGAAACGCCGCACTTCCGCTTCCGGCAACAACCGCTAGGCCACGCCCCCTG	cat1	universal open	N	10.8685	2437	2311	1622	2946	2221	2049	1670	1440	12001	10400	10734	10991	9086	9076
ATCGAAAGGATGGGAGTACTAAGCTCACCACTAGGTGGCGCTAAACCGCGAAAACGTTCGCGCACCACTAGGTGGCGCCCTCTTGTGGGCGGAAACGCCGCACTTCCGGCAACAACCGCCTAGTAGTCAGCACGGACAAAGTACTGAGAT	CACCACTAGGTGGCGCTAAACCGCGAAAACGTTCGCGCACCACTAGGTGGCGCCCTCTTGTGGGCGGAAACGCCGCACTTCCGGCAACAACCGCCTAGTA	cat1	universal open	N	10.8522	1408	1409	758	2113	1519	1894	1673	2325	7455	6389	4781	6799	8075	9019
ATCGAAAGGATGGGAGTACTAAGCTACCACTAGGTGGCGCTAGGCCACGCCCTCTTGTGGGCGGAAACGCCGCACTTCCGCTTCCGGCAACAACCGCTAGGCCACGCCCTCTTGTGGGCGGGCTTGTCAGCACGGACAAAGTACTGAGAT	ACCACTAGGTGGCGCTAGGCCACGCCCTCTTGTGGGCGGAAACGCCGCACTTCCGCTTCCGGCAACAACCGCTAGGCCACGCCCTCTTGTGGGCGGGCTT	cat1	universal open	N	10.8355	2047	2110	1028	2057	3336	3262	2776	4020	9601	8053	10124	11447	11608	12294
ATCGAAAGGATGGGAGTACTAAGCTTTCGCGTTTAAATTTCGCGCACCACTAGGTGGCGCTAGGCGGAAACGCCGCACTTCCGCTGTCTCGCGCACCACTAGGTGGCGCCCTCTTGTGGGCGGGTGTCAGCACGGACAAAGTACTGAGAT	TTCGCGTTTAAATTTCGCGCACCACTAGGTGGCGCTAGGCGGAAACGCCGCACTTCCGCTGTCTCGCGCACCACTAGGTGGCGCCCTCTTGTGGGCGGGT	cat1	universal open	N	10.8278	1175	1063	945	1909	2876	2792	2771	4216	5351	5983	9549	10795	5223	5822
ATCGAAAGGATGGGAGTACTAAGCTACTTCCGCCTAACGCGACTAGCGCCACTAGAGGGCGGAAACGCCGCACTTCCGCTGTCTCGCGCACCACTAGGTGGCGCTAAACCGCGAAACCGGAAGTTGTCAGCACGGACAAAGTACTGAGAT	ACTTCCGCCTAACGCGACTAGCGCCACTAGAGGGCGGAAACGCCGCACTTCCGCTGTCTCGCGCACCACTAGGTGGCGCTAAACCGCGAAACCGGAAGTT	cat1	universal open	N	10.8224	1446	1834	1617	1690	1151	1420	1174	1702	4907	4636	4388	6150	7053	6554
ATCGAAAGGATGGGAGTACTAAGCTACTAGCGCCACTAGAGGGCGGAAGTCCCGCCTCTCGCGAGTAAAAGGGGCGGAAACGCCGCACTTCCGGCAACAACCGCTAGGCGGAAGTCCCGCCATAGGTCAGCACGGACAAAGTACTGAGAT	ACTAGCGCCACTAGAGGGCGGAAGTCCCGCCTCTCGCGAGTAAAAGGGGCGGAAACGCCGCACTTCCGGCAACAACCGCTAGGCGGAAGTCCCGCCATAG	cat1	universal open	N	10.7851	994	701	1498	1421	968	830	966	819	5855	5292	8176	6459	4250	4263
ATCGAAAGGATGGGAGTACTAAGCTAAACGTTCGCGCACCACTAGGTGGCGCTAAACCGCGTTTAAATTTCGCGCACCACTAGGTGGCGCCACTAGAGGGCGGAAACGCCGCACTTCCGCCATCCGTCAGCACGGACAAAGTACTGAGAT	AAACGTTCGCGCACCACTAGGTGGCGCTAAACCGCGTTTAAATTTCGCGCACCACTAGGTGGCGCCACTAGAGGGCGGAAACGCCGCACTTCCGCCATCC	cat1	universal open	N	10.7776	1945	1571	1895	2020	2073	2337	1068	1640	10224	9006	9669	10671	5751	7004
ATCGAAAGGATGGGAGTACTAAGCTCGTTCGCGCACCACTAGGTGGCGCCACTAGAGGGCGGAAACGCCGCACTTCCGCTTCCGGCAACAACCGCTAGGCGGAAACGCCGCACTTCCGCCTAGAAGTCAGCACGGACAAAGTACTGAGAT	CGTTCGCGCACCACTAGGTGGCGCCACTAGAGGGCGGAAACGCCGCACTTCCGCTTCCGGCAACAACCGCTAGGCGGAAACGCCGCACTTCCGCCTAGAA	cat1	universal open	N	10.7759	1674	1685	1285	1279	2049	2426	1518	2198	8514	6307	7750	5534	8395	8980
ATCGAAAGGATGGGAGTACTAAGCTCACGCCCTCTTGTGGGCGGAAACGCCGCACTTCCGCTGTCTCGCGCACCACTAGGTGGCGCTAGGCGGAAACGCCGCACTTCCGCCAGAAGAGGGCGCCAGTCAGCACGGACAAAGTACTGAGAT	CACGCCCTCTTGTGGGCGGAAACGCCGCACTTCCGCTGTCTCGCGCACCACTAGGTGGCGCTAGGCGGAAACGCCGCACTTCCGCCAGAAGAGGGCGCCA	cat1	universal open	N	10.7642	1700	1423	1842	1559	1621	1823	1571	2983	7876	5150	8160	9271	6381	6810
ATCGAAAGGATGGGAGTACTAAGCTCTCGCGCACCACTAGGTGGCGCTAAACCGCGTTTAAATTTCGCGCACCACTAGGTGGCGCCCTCTTGTGGGCGGAAACGCCGCACTTCCGCTTCCGGCTAGTCAGCACGGACAAAGTACTGAGAT	CTCGCGCACCACTAGGTGGCGCTAAACCGCGTTTAAATTTCGCGCACCACTAGGTGGCGCCCTCTTGTGGGCGGAAACGCCGCACTTCCGCTTCCGGCTA	cat1	universal open	N	10.6975	1417	1081	1039	929	2606	2325	1912	2123	9884	7654	10077	10823	9743	11624
ATCGAAAGGATGGGAGTACTAAGCTGCGCACCACTAGGTGGCGCTAAACCGCGTTTAAATTTCGCGCACCACTAGGTGGCGCTAGGCGGAAACGCCGCACTTCCGCCCTCTTGTGGGCGGGACTGGTCAGCACGGACAAAGTACTGAGAT	GCGCACCACTAGGTGGCGCTAAACCGCGTTTAAATTTCGCGCACCACTAGGTGGCGCTAGGCGGAAACGCCGCACTTCCGCCCTCTTGTGGGCGGGACTG	cat1	universal open	N	10.6875	2201	2362	1712	1655	2836	2737	3006	3718	5986	4750	5866	4411	6296	6062
ATCGAAAGGATGGGAGTACTAAGCTGCACCACTAGGTGGCGCCCTCTTGTGGGCGGAAACGCCGCACTTCCGCTTCCGGCAACAACCGCTAGGCGGAAACGCCGCACTTCCGCCTCTCGCGACCCGTCAGCACGGACAAAGTACTGAGAT	GCACCACTAGGTGGCGCCCTCTTGTGGGCGGAAACGCCGCACTTCCGCTTCCGGCAACAACCGCTAGGCGGAAACGCCGCACTTCCGCCTCTCGCGACCC	cat1	universal open	N	10.6471	2666	2820	1651	1670	4564	4480	3201	3573	15442	12153	12346	10782	14137	14293
ATCGAAAGGATGGGAGTACTAAGCTCCACTAGGTGGCGCTAGGCCACGCCCTCTTGTGGGCGGAAACGCCGCACTTCCGCTTCCGGCAACAACCGCTAGGCGGAAACGCCGCACTTCCGGAAGAGGTCAGCACGGACAAAGTACTGAGAT	CCACTAGGTGGCGCTAGGCCACGCCCTCTTGTGGGCGGAAACGCCGCACTTCCGCTTCCGGCAACAACCGCTAGGCGGAAACGCCGCACTTCCGGAAGAG	cat1	universal open	N	10.6095	824	901	830	1003	2273	1875	1632	1659	5999	4313	6484	4484	7689	7299
ATCGAAAGGATGGGAGTACTAAGCTTCCGCTGTCTCGCGCACCACTAGGTGGCGCCCTCTTGTGGGCGGAAACGCCGCACTTCCGCTGTCTCGCGCACCACTAGGTGGCGCTAAACCGCGAGAGCGTCAGCACGGACAAAGTACTGAGAT	TCCGCTGTCTCGCGCACCACTAGGTGGCGCCCTCTTGTGGGCGGAAACGCCGCACTTCCGCTGTCTCGCGCACCACTAGGTGGCGCTAAACCGCGAGAGC	cat1	universal open	N	10.5786	575	947	575	1124	1772	1372	1450	1526	5282	4107	5990	6087	4935	5832
ATCGAAAGGATGGGAGTACTAAGCTTAGGTGGCGCTAGGCCACGCCCTCTTGTGGGCGGAAACGCCGCACTTCCGCCTAACGCGAAAACGTTCGCGCACCACTAGGTGGCGCTAGGCGGAAGTGCGTCAGCACGGACAAAGTACTGAGAT	TAGGTGGCGCTAGGCCACGCCCTCTTGTGGGCGGAAACGCCGCACTTCCGCCTAACGCGAAAACGTTCGCGCACCACTAGGTGGCGCTAGGCGGAAGTGC	cat1	universal open	N	10.5771	456	644	415	399	1082	811	624	561	3249	2439	3223	2831	2040	2061
ATCGAAAGGATGGGAGTACTAAGCTGCGTTTAAATTTCGCGTTTAAATTTCGCGTTTAAATTTCGCGACTAGCGCCACTAGAGGGCGGAAGTCCCGCCAGAAGAGGGCGGAAGTCCCGCCTAGCCGTCAGCACGGACAAAGTACTGAGAT	GCGTTTAAATTTCGCGTTTAAATTTCGCGTTTAAATTTCGCGACTAGCGCCACTAGAGGGCGGAAGTCCCGCCAGAAGAGGGCGGAAGTCCCGCCTAGCC	cat1	universal open	N	10.539	265	368	339	245	2257	2468	1419	2176	1115	1343	1257	2056	2256	2652
ATCGAAAGGATGGGAGTACTAAGCTACTAGGTGGCGCTAGGCGGAAACGCCGCACTTCCGCTTCCGGCAACAACCGCCTCTCGCGAGTAAAAGGGGCGGAGACCACGCCCTCTTGTGGGCGGGACGTCAGCACGGACAAAGTACTGAGAT	ACTAGGTGGCGCTAGGCGGAAACGCCGCACTTCCGCTTCCGGCAACAACCGCCTCTCGCGAGTAAAAGGGGCGGAGACCACGCCCTCTTGTGGGCGGGAC	cat1	universal open	N	10.4054	893	1232	921	1527	1962	2331	1912	2707	6745	6124	7695	10481	8525	7778
ATCGAAAGGATGGGAGTACTAAGCTCACTTCCGGCAACAACCGCTAGGCGGAAACGCCGCACTTCCGCTGTCTCGCGCACCACTAGGTGGCGCTAGGCGGAGACCACGCCCTCTTGTGGGCGGAGGTCAGCACGGACAAAGTACTGAGAT	CACTTCCGGCAACAACCGCTAGGCGGAAACGCCGCACTTCCGCTGTCTCGCGCACCACTAGGTGGCGCTAGGCGGAGACCACGCCCTCTTGTGGGCGGAG	cat1	universal open	N	10.3673	1692	1714	2107	1192	2054	1878	2453	3288	8750	6411	8692	5517	10649	10218
ATCGAAAGGATGGGAGTACTAAGCTCGTTTAAATTTCGCGCACCACTAGGTGGCGCTAGGCGGAAACGCCGCACTTCCGCTGTCTCGCGCACCACTAGGTGGCGCTAGGCGGAAGTCCCGCCTTCGTCAGCACGGACAAAGTACTGAGAT	CGTTTAAATTTCGCGCACCACTAGGTGGCGCTAGGCGGAAACGCCGCACTTCCGCTGTCTCGCGCACCACTAGGTGGCGCTAGGCGGAAGTCCCGCCTTC	cat1	universal open	N	10.3631	1878	1871	1080	1700	1501	1146	874	1925	12174	8808	7961	8293	5685	6585
ATCGAAAGGATGGGAGTACTAAGCTCCACTAGGTGGCGCTAAACCGCGTTTAAATTTCGCGTTTAAATTTCGCGCACCACTAGGTGGCGCTAGGCGGAGACCACGCCCTCTTGTGGGCGGAGCCTGTCAGCACGGACAAAGTACTGAGAT	CCACTAGGTGGCGCTAAACCGCGTTTAAATTTCGCGTTTAAATTTCGCGCACCACTAGGTGGCGCTAGGCGGAGACCACGCCCTCTTGTGGGCGGAGCCT	cat1	universal open	N	10.3208	750	831	929	1396	1887	1954	1136	2693	6005	4400	7395	9568	6793	6822
ATCGAAAGGATGGGAGTACTAAGCTCACTAGGTGGCGCTAGGCGGAAACGCCGCACTTCCGGCAACAACCGCTAGGCTCCGCCCTCTTGTGGGCGGAAACGCCGCACTTCCGCCTCTCGCGAGCTGTCAGCACGGACAAAGTACTGAGAT	CACTAGGTGGCGCTAGGCGGAAACGCCGCACTTCCGGCAACAACCGCTAGGCTCCGCCCTCTTGTGGGCGGAAACGCCGCACTTCCGCCTCTCGCGAGCT	cat1	universal open	N	10.2955	2185	2337	1012	1966	3379	3890	4883	5589	13375	12497	13229	15025	18254	16429
ATCGAAAGGATGGGAGTACTAAGCTGGCCACGCCCTCTTGTGGGCGGAGACCACGCCCTCTTGTGGGCGGAAACGCCGCACTTCCGGCAACAACCGCTAGGCGGAAACGCCGCACTTCCGCCCAAGTCAGCACGGACAAAGTACTGAGAT	GGCCACGCCCTCTTGTGGGCGGAGACCACGCCCTCTTGTGGGCGGAAACGCCGCACTTCCGGCAACAACCGCTAGGCGGAAACGCCGCACTTCCGCCCAA	cat1	universal open	N	10.1605	1835	1930	989	1040	1683	1762	926	1786	10863	9543	10221	12669	9640	10461
ATCGAAAGGATGGGAGTACTAAGCTACTAGCGCCACTAGAGGGCGGAAACGCCGCACTTCCGCTTCCGGCAACAACCGCTAGGCGGAAACGCCGCACTTCCGGCAACAACCGCTAGGCGGAGCCCGTCAGCACGGACAAAGTACTGAGAT	ACTAGCGCCACTAGAGGGCGGAAACGCCGCACTTCCGCTTCCGGCAACAACCGCTAGGCGGAAACGCCGCACTTCCGGCAACAACCGCTAGGCGGAGCCC	cat1	universal open	N	10.1199	2134	1657	956	1018	2067	2192	3250	3405	7001	5066	3156	5121	10137	10201
ATCGAAAGGATGGGAGTACTAAGCTCGGCAACAACCGCTAGGCGGAAACGCCGCACTTCCGCTTCCGGCAACAACCGCTAGGCGGAAACGCCGCACTTCCGGAAGTCCCGCCAGAAGAGGGCGCCGTCAGCACGGACAAAGTACTGAGAT	CGGCAACAACCGCTAGGCGGAAACGCCGCACTTCCGCTTCCGGCAACAACCGCTAGGCGGAAACGCCGCACTTCCGGAAGTCCCGCCAGAAGAGGGCGCC	cat1	universal open	N	10.0631	2049	2021	2041	3066	2241	2147	1223	1723	7437	5690	7124	7074	8666	9664
ATCGAAAGGATGGGAGTACTAAGCTTCGCGCACCACTAGGTGGCGCTAAACCGCGAAAACGTTCGCGCACCACTAGGTGGCGCCCTCTTGTGGGCGGAAACGCCGCACTTCCGATTGCGCATGCTGTCAGCACGGACAAAGTACTGAGAT	TCGCGCACCACTAGGTGGCGCTAAACCGCGAAAACGTTCGCGCACCACTAGGTGGCGCCCTCTTGTGGGCGGAAACGCCGCACTTCCGATTGCGCATGCT	cat1	universal open	N	10.0543	2470	2401	3338	1685	2538	2220	2244	3136	10779	9520	11875	12531	8319	9425
ATCGAAAGGATGGGAGTACTAAGCTCGAAAACGTTCGCGCACCACTAGGTGGCGCCCTCTTGTGGGCGGAAACGCCGCACTTCCGCTGTCTCGCGCACCACTAGGTGGCGCTAAACCGCGAATTTGTCAGCACGGACAAAGTACTGAGAT	CGAAAACGTTCGCGCACCACTAGGTGGCGCCCTCTTGTGGGCGGAAACGCCGCACTTCCGCTGTCTCGCGCACCACTAGGTGGCGCTAAACCGCGAATTT	cat1	universal open	N	10.049	2189	1568	1564	1667	3777	3752	3059	4205	8324	7196	9654	10622	13776	15899
ATCGAAAGGATGGGAGTACTAAGCTCACTAGGTGGCGCTAGGCCACGCCCTCTTGTGGGCGGAAACGCCGCACTTCCGGCAACAACCGCTAGGCGGAAACGCCGCACTTCCGCCTCTCGCGAGTGGTCAGCACGGACAAAGTACTGAGAT	CACTAGGTGGCGCTAGGCCACGCCCTCTTGTGGGCGGAAACGCCGCACTTCCGGCAACAACCGCTAGGCGGAAACGCCGCACTTCCGCCTCTCGCGAGTG	cat1	universal open	N	9.99258	1147	1569	1002	947	3015	3220	3477	3601	7782	7320	7070	8505	12679	13465
ATCGAAAGGATGGGAGTACTAAGCTACCACTAGGTGGCGCTAGGCTCCGCCTCTCGCGAGTAAAAGGGGCGGAAACGCCGCACTTCCGCTGTCTCGCGCACCACTAGGTGGCGCTAGGCGGAGTTGTCAGCACGGACAAAGTACTGAGAT	ACCACTAGGTGGCGCTAGGCTCCGCCTCTCGCGAGTAAAAGGGGCGGAAACGCCGCACTTCCGCTGTCTCGCGCACCACTAGGTGGCGCTAGGCGGAGTT	cat1	universal open	N	9.98938	1109	1187	1515	763	1921	2190	1630	3173	5613	3900	11322	7740	9142	10368
ATCGAAAGGATGGGAGTACTAAGCTACTAGGTGGCGCTAAACCGCGAAAACGTTCGCGCACCACTAGGTGGCGCCACTAGAGGGCGGAAACGCCGCACTTCCGCTTCCGGCAACAACCGCCCACAGTCAGCACGGACAAAGTACTGAGAT	ACTAGGTGGCGCTAAACCGCGAAAACGTTCGCGCACCACTAGGTGGCGCCACTAGAGGGCGGAAACGCCGCACTTCCGCTTCCGGCAACAACCGCCCACA	cat1	universal open	N	9.91525	1376	1277	975	1578	1960	1951	1882	2216	8273	7801	11078	11929	6378	7184
ATCGAAAGGATGGGAGTACTAAGCTCTCGCGCACCACTAGGTGGCGCTAGGCGGAAACGCCGCACTTCCGCTGTCTCGCGCACCACTAGGTGGCGCTAGGCGGAAACGCCGCACTTCCGGAAGCCGTCAGCACGGACAAAGTACTGAGAT	CTCGCGCACCACTAGGTGGCGCTAGGCGGAAACGCCGCACTTCCGCTGTCTCGCGCACCACTAGGTGGCGCTAGGCGGAAACGCCGCACTTCCGGAAGCC	cat1	universal open	N	9.91492	1952	2104	786	1393	2582	2777	2929	4142	9155	8515	7669	11199	12404	12674
ATCGAAAGGATGGGAGTACTAAGCTTCGCGCACCACTAGGTGGCGCTAGGCGGAAACGCCGCACTTCCGCTGTCTCGCGCACCACTAGGTGGCGCTAGGCGGAAACGCCGCACTTCCGGAAGTCTGTCAGCACGGACAAAGTACTGAGAT	TCGCGCACCACTAGGTGGCGCTAGGCGGAAACGCCGCACTTCCGCTGTCTCGCGCACCACTAGGTGGCGCTAGGCGGAAACGCCGCACTTCCGGAAGTCT	cat1	universal open	N	9.89589	632	1080	489	900	1349	1427	1099	1632	7704	7237	7057	15073	5435	7345
ATCGAAAGGATGGGAGTACTAAGCTCGGAAACGCCGCACTTCCGCCCTCTTGTGGGCGGAAACGCCGCACTTCCGCTTCCGGCAACAACCGCTAGGCGGAGACCACGCCCTCTTGTGGGCGGGACGTCAGCACGGACAAAGTACTGAGAT	CGGAAACGCCGCACTTCCGCCCTCTTGTGGGCGGAAACGCCGCACTTCCGCTTCCGGCAACAACCGCTAGGCGGAGACCACGCCCTCTTGTGGGCGGGAC	cat1	universal open	N	9.85904	2081	2143	2186	2183	4806	4539	5751	5644	10240	8158	14413	11647	18489	16995
ATCGAAAGGATGGGAGTACTAAGCTCTTGTGGGCGGAAACGCCGCACTTCCGCTGTCTCGCGCACCACTAGGTGGCGCCCTCTTGTGGGCGGAAACGCCGCACTTCCGGCAACAACCGCCCACTAGTCAGCACGGACAAAGTACTGAGAT	CTTGTGGGCGGAAACGCCGCACTTCCGCTGTCTCGCGCACCACTAGGTGGCGCCCTCTTGTGGGCGGAAACGCCGCACTTCCGGCAACAACCGCCCACTA	cat1	universal open	N	9.82934	1708	1570	1890	1862	2251	2098	2028	2971	6928	6684	7311	7444	7526	8985
ATCGAAAGGATGGGAGTACTAAGCTGCGGAAACGCCGCACTTCCGGCAACAACCGCTAGGCGGAAACGCCGCACTTCCGCTGTCTCGCGCACCACTAGGTGGCGCCCTCTTGTGGGCGGAAGTCTGTCAGCACGGACAAAGTACTGAGAT	GCGGAAACGCCGCACTTCCGGCAACAACCGCTAGGCGGAAACGCCGCACTTCCGCTGTCTCGCGCACCACTAGGTGGCGCCCTCTTGTGGGCGGAAGTCT	cat1	universal open	N	9.82895	2279	2093	2445	3144	3371	3104	2890	3709	11970	9887	8425	8802	12377	12627
ATCGAAAGGATGGGAGTACTAAGCTCGCACTTCCGCTGTCTCGCGCACCACTAGGTGGCGCTAGGCGGAAACGCCGCACTTCCGCTGTCTCGCGCACCACTAGGTGGCGCCACTAGATGGCGGCGGTCAGCACGGACAAAGTACTGAGAT	CGCACTTCCGCTGTCTCGCGCACCACTAGGTGGCGCTAGGCGGAAACGCCGCACTTCCGCTGTCTCGCGCACCACTAGGTGGCGCCACTAGATGGCGGCG	cat1	universal open	N	9.76894	2054	1709	2113	1802	1648	1757	2414	3184	10536	8875	8987	9126	13289	12149
ATCGAAAGGATGGGAGTACTAAGCTCGGAAACGCCGCACTTCCGGCAACAACCGCCCTCTTGTGGGCGGAAACGCCGCACTTCCGCTGTCTCGCGCACCACTAGGTGGCGCTAAACCGCGAAATAGTCAGCACGGACAAAGTACTGAGAT	CGGAAACGCCGCACTTCCGGCAACAACCGCCCTCTTGTGGGCGGAAACGCCGCACTTCCGCTGTCTCGCGCACCACTAGGTGGCGCTAAACCGCGAAATA	cat1	universal open	N	9.72512	1556	1232	1395	1040	1320	1326	722	1470	6232	4096	4943	6674	6719	6393
ATCGAAAGGATGGGAGTACTAAGCTGCACTTCCGCTGTCTCGCGCACCACTAGGTGGCGCTAAACCGCGTTTAAATTTCGCGACTAGCGCCACTAGAGGGCGGAAGTCCCGCCTAACGCGAAATTGTCAGCACGGACAAAGTACTGAGAT	GCACTTCCGCTGTCTCGCGCACCACTAGGTGGCGCTAAACCGCGTTTAAATTTCGCGACTAGCGCCACTAGAGGGCGGAAGTCCCGCCTAACGCGAAATT	cat1	universal open	N	9.72178	1456	1657	866	2011	1698	1964	1160	1775	8574	6607	8422	8836	7767	7406
ATCGAAAGGATGGGAGTACTAAGCTCCCTCTTGTGGGCGGAGACCACGCCCTCTTGTGGGCGGAAACGCCGCACTTCCGGCAACAACCGCTAGGCTCCGCCTCTCGCGAGTAAAAGGGGCGGGTCGTCAGCACGGACAAAGTACTGAGAT	CCCTCTTGTGGGCGGAGACCACGCCCTCTTGTGGGCGGAAACGCCGCACTTCCGGCAACAACCGCTAGGCTCCGCCTCTCGCGAGTAAAAGGGGCGGGTC	cat1	universal open	N	9.68784	1169	1372	617	1155	2235	2542	2593	2123	6935	5224	4521	7222	8431	9066
ATCGAAAGGATGGGAGTACTAAGCTCGCACCACTAGGTGGCGCTAGGCGGAAACGCCGCACTTCCGCTGTCTCGCGCACCACTAGGTGGCGCTAGGCGGAAACGCCGCACTTCCGCTTCCGGCTTGTCAGCACGGACAAAGTACTGAGAT	CGCACCACTAGGTGGCGCTAGGCGGAAACGCCGCACTTCCGCTGTCTCGCGCACCACTAGGTGGCGCTAGGCGGAAACGCCGCACTTCCGCTTCCGGCTT	cat1	universal open	N	9.66165	2140	2335	1564	2000	3748	3586	2029	2501	14807	10608	13202	18566	12246	13494
ATCGAAAGGATGGGAGTACTAAGCTCGCGCACCACTAGGTGGCGCTAGGCGGAAACGCCGCACTTCCGCTTCCGGCAACAACCGCCCTCTTGTGGGCGGAAACGCCGCACTTCCGCTTCCGGCAGGTCAGCACGGACAAAGTACTGAGAT	CGCGCACCACTAGGTGGCGCTAGGCGGAAACGCCGCACTTCCGCTTCCGGCAACAACCGCCCTCTTGTGGGCGGAAACGCCGCACTTCCGCTTCCGGCAG	cat1	universal open	N	9.60908	2095	2187	1556	1744	3208	2461	3223	5121	13111	12531	12235	12919	12507	13405
ATCGAAAGGATGGGAGTACTAAGCTGAAGAGGGCGGAAACGCCGCACTTCCGGCAACAACCGCTAGGCGGAAACGCCGCACTTCCGCTGTCTCGCGCACCACTAGGTGGCGCTAGGCTCCGCCCAGTCAGCACGGACAAAGTACTGAGAT	GAAGAGGGCGGAAACGCCGCACTTCCGGCAACAACCGCTAGGCGGAAACGCCGCACTTCCGCTGTCTCGCGCACCACTAGGTGGCGCTAGGCTCCGCCCA	cat1	universal open	N	9.58499	1916	1936	1704	1872	3522	4249	7223	6590	8885	6867	8455	6367	10648	12384
ATCGAAAGGATGGGAGTACTAAGCTCCACTAGGTGGCGCTAAACCGCGTTTAAATTTCGCGACTAGCGCCCTCTTGTGGGCGGAAACGCCGCACTTCCGCTTCCGGCAACAACCGCTAGGCGGTCGTCAGCACGGACAAAGTACTGAGAT	CCACTAGGTGGCGCTAAACCGCGTTTAAATTTCGCGACTAGCGCCCTCTTGTGGGCGGAAACGCCGCACTTCCGCTTCCGGCAACAACCGCTAGGCGGTC	cat1	universal open	N	9.57976	1990	1783	1401	1840	3132	2960	3511	4026	12708	8978	10536	9735	11665	13942
ATCGAAAGGATGGGAGTACTAAGCTCTTCCGGCAACAACCGCTAGGCGGAAACGCCGCACTTCCGCTGTCTCGCGCACCACTAGGTGGCGCTAGGCGGAGACCACGCCCTCTTGTGGGCGGGGCTGTCAGCACGGACAAAGTACTGAGAT	CTTCCGGCAACAACCGCTAGGCGGAAACGCCGCACTTCCGCTGTCTCGCGCACCACTAGGTGGCGCTAGGCGGAGACCACGCCCTCTTGTGGGCGGGGCT	cat1	universal open	N	9.57115	1771	1881	2175	1789	2781	2655	4349	3214	9531	7395	11111	12122	11257	12308
ATCGAAAGGATGGGAGTACTAAGCTCTCTTGTGGGCGGAAACGCCGCACTTCCGCTGTCTCGCGCACCACTAGGTGGCGCCACTAGAGGGCGGAAACGCCGCACTTCCGGCAACAACCGCCCAAGGTCAGCACGGACAAAGTACTGAGAT	CTCTTGTGGGCGGAAACGCCGCACTTCCGCTGTCTCGCGCACCACTAGGTGGCGCCACTAGAGGGCGGAAACGCCGCACTTCCGGCAACAACCGCCCAAG	cat1	universal open	N	9.56722	865	773	1289	1576	1809	1811	2437	2208	6083	4699	8761	6851	6165	5979
ATCGAAAGGATGGGAGTACTAAGCTCACTAGGTGGCGCTAGGCGGAAACGCCGCACTTCCGCTGTCTCGCGCACCACTAGGTGGCGCTAAACCGCGAAACCGGAAGTCCCGCCTAACGCGAAGCCGTCAGCACGGACAAAGTACTGAGAT	CACTAGGTGGCGCTAGGCGGAAACGCCGCACTTCCGCTGTCTCGCGCACCACTAGGTGGCGCTAAACCGCGAAACCGGAAGTCCCGCCTAACGCGAAGCC	cat1	universal open	N	9.56412	1327	1841	1336	877	1409	1466	1575	2623	8384	7882	11575	7830	7301	7578
ATCGAAAGGATGGGAGTACTAAGCTTTCGCGTTTAAATTTCGCGCACCACTAGGTGGCGCTAGGCGGAAACGCCGCACTTCCGCTGTCTCGCGCACCACTAGGTGGCGCTAGGCCACGCCCCCTAGTCAGCACGGACAAAGTACTGAGAT	TTCGCGTTTAAATTTCGCGCACCACTAGGTGGCGCTAGGCGGAAACGCCGCACTTCCGCTGTCTCGCGCACCACTAGGTGGCGCTAGGCCACGCCCCCTA	cat1	universal open	N	9.5292	1233	1124	900	1012	1889	2047	1401	2412	6970	5957	4975	8758	5579	6583
ATCGAAAGGATGGGAGTACTAAGCTGCGACTAGCGCCCTCTTGTGGGCGGAAACGCCGCACTTCCGCTGTCTCGCGCACCACTAGGTGGCGCTAGGCGGAAACGCCGCACTTCCGCTTCCGGCTGGTCAGCACGGACAAAGTACTGAGAT	GCGACTAGCGCCCTCTTGTGGGCGGAAACGCCGCACTTCCGCTGTCTCGCGCACCACTAGGTGGCGCTAGGCGGAAACGCCGCACTTCCGCTTCCGGCTG	cat1	universal open	N	9.5081	2486	2740	2074	2638	2433	2235	2482	2351	17774	14965	14026	14764	11760	12642
ATCGAAAGGATGGGAGTACTAAGCTCACTAGGTGGCGCCACTAGAGGGCGGAAACGCCGCACTTCCGCTGTCTCGCGCACCACTAGGTGGCGCTACGCAAAACAAGCCCCGCCTCTCGCGAAAGGGTCAGCACGGACAAAGTACTGAGAT	CACTAGGTGGCGCCACTAGAGGGCGGAAACGCCGCACTTCCGCTGTCTCGCGCACCACTAGGTGGCGCTACGCAAAACAAGCCCCGCCTCTCGCGAAAGG	cat1	universal open	N	9.50773	1781	1386	953	1534	1534	1825	1366	1846	7374	6331	8922	8113	7908	8677
ATCGAAAGGATGGGAGTACTAAGCTAGGGCGGAAACGCCGCACTTCCGCTGTCTCGCGCACCACTAGGTGGCGCTAAACCGCGTTTAAATTTCGCGCACCACTAGGTGGCGCCACTAGAGGGCGCGTCAGCACGGACAAAGTACTGAGAT	AGGGCGGAAACGCCGCACTTCCGCTGTCTCGCGCACCACTAGGTGGCGCTAAACCGCGTTTAAATTTCGCGCACCACTAGGTGGCGCCACTAGAGGGCGC	cat1	universal open	N	9.50459	1267	1770	1446	1184	985	1292	1363	1371	6978	5060	6294	5701	4314	5194
ATCGAAAGGATGGGAGTACTAAGCTCCGCACTTCCGCTGTCTCGCGCACCACTAGGTGGCGCTAGGCGGAGACCACGCCCTCTTGTGGGCGGAAACGCCGCACTTCCGGCAACAACCGCCCTCTCGTCAGCACGGACAAAGTACTGAGAT	CCGCACTTCCGCTGTCTCGCGCACCACTAGGTGGCGCTAGGCGGAGACCACGCCCTCTTGTGGGCGGAAACGCCGCACTTCCGGCAACAACCGCCCTCTC	cat1	universal open	N	9.4926	1790	1901	1761	3103	1841	1964	2292	2982	12358	9758	16258	19280	6930	6500
ATCGAAAGGATGGGAGTACTAAGCTCTAGGCGGAAACGCCGCACTTCCGCTGTCTCGCGCACCACTAGGTGGCGCCCTCTTGTGGGCGGAAACGCCGCACTTCCGGCAACAACCGCTAGGCGGGGGTCAGCACGGACAAAGTACTGAGAT	CTAGGCGGAAACGCCGCACTTCCGCTGTCTCGCGCACCACTAGGTGGCGCCCTCTTGTGGGCGGAAACGCCGCACTTCCGGCAACAACCGCTAGGCGGGG	cat1	universal open	N	9.47771	1270	940	1863	1280	2735	2561	3321	4431	5471	4635	4868	2952	9549	9893
ATCGAAAGGATGGGAGTACTAAGCTCGTTTAAATTTCGCGCACCACTAGGTGGCGCTACGCAAAACAAGCCCCGCCTCTCGCGACTAGCGCCCTCTTGTGGGCGGAAACGCCGCACTTCCGGCTCGTCAGCACGGACAAAGTACTGAGAT	CGTTTAAATTTCGCGCACCACTAGGTGGCGCTACGCAAAACAAGCCCCGCCTCTCGCGACTAGCGCCCTCTTGTGGGCGGAAACGCCGCACTTCCGGCTC	cat1	universal open	N	9.45992	1838	1410	1978	1755	2380	2638	2960	3616	8702	7424	15503	11489	7837	8799
ATCGAAAGGATGGGAGTACTAAGCTCACTAGGTGGCGCTAGGCGGAAACGCCGCACTTCCGCTGTCTCGCGCACCACTAGGTGGCGCTAAACCGCGAAACCGGAAGTCCCGCCTAACGCGAAAAGGTCAGCACGGACAAAGTACTGAGAT	CACTAGGTGGCGCTAGGCGGAAACGCCGCACTTCCGCTGTCTCGCGCACCACTAGGTGGCGCTAAACCGCGAAACCGGAAGTCCCGCCTAACGCGAAAAG	cat1	universal open	N	9.45582	721	657	282	668	1596	2171	2893	3994	3200	1829	1701	3154	11384	12282
ATCGAAAGGATGGGAGTACTAAGCTCCGCACTTCCGCTGTCTCGCGCACCACTAGGTGGCGCTAGGCGGAAACGCCGCACTTCCGCCAGAAGAGGGCGGAAACGCCGCACTTCCGCTTCCGGCCCGTCAGCACGGACAAAGTACTGAGAT	CCGCACTTCCGCTGTCTCGCGCACCACTAGGTGGCGCTAGGCGGAAACGCCGCACTTCCGCCAGAAGAGGGCGGAAACGCCGCACTTCCGCTTCCGGCCC	cat1	universal open	N	9.41296	1601	1982	843	951	1966	1924	1954	1924	9149	7271	7784	8212	7359	7516
ATCGAAAGGATGGGAGTACTAAGCTACTAGAGGGCGGAAACGCCGCACTTCCGGCAACAACCGCTAGGCGGAAACGCCGCACTTCCGCTGTCTCGCGCACCACTAGGTGGCGCTAGGCGGAGCCGGTCAGCACGGACAAAGTACTGAGAT	ACTAGAGGGCGGAAACGCCGCACTTCCGGCAACAACCGCTAGGCGGAAACGCCGCACTTCCGCTGTCTCGCGCACCACTAGGTGGCGCTAGGCGGAGCCG	cat1	universal open	N	9.40388	749	808	512	693	1606	1750	2408	2657	2359	2493	906	1425	6153	5761
ATCGAAAGGATGGGAGTACTAAGCTGTTTAAATTTCGCGCACCACTAGGTGGCGCTAAACCGCGTTTAAATTTCGCGACTAGCGCCACTAGAGGGCGGAGACCACGCCCAACCACCAGGGGGCGCGTCAGCACGGACAAAGTACTGAGAT	GTTTAAATTTCGCGCACCACTAGGTGGCGCTAAACCGCGTTTAAATTTCGCGACTAGCGCCACTAGAGGGCGGAGACCACGCCCAACCACCAGGGGGCGC	cat1	universal open	N	9.39704	563	815	449	469	961	787	1043	997	4630	3150	2735	1789	2085	2598
ATCGAAAGGATGGGAGTACTAAGCTCGCGAAAACGTTCGCGCACCACTAGGTGGCGCTAGGCGGAGACCACGCCCTCTTGTGGGCGGAAACGCCGCACTTCCGGCAACAACCGCTAGGCGGGTCTGTCAGCACGGACAAAGTACTGAGAT	CGCGAAAACGTTCGCGCACCACTAGGTGGCGCTAGGCGGAGACCACGCCCTCTTGTGGGCGGAAACGCCGCACTTCCGGCAACAACCGCTAGGCGGGTCT	cat1	universal open	N	9.38748	1644	1690	2218	1271	1439	1451	1711	1776	6905	5845	10723	7406	9943	9135
ATCGAAAGGATGGGAGTACTAAGCTAAACGCCGCACTTCCGCTTCCGGCAACAACCGCTAGGCGGAAACGCCGCACTTCCGCTGTCTCGCGCACCACTAGGTGGCGCCACTAGAGGGCGGGTTCAGTCAGCACGGACAAAGTACTGAGAT	AAACGCCGCACTTCCGCTTCCGGCAACAACCGCTAGGCGGAAACGCCGCACTTCCGCTGTCTCGCGCACCACTAGGTGGCGCCACTAGAGGGCGGGTTCA	cat1	universal open	N	9.37041	1047	922	1319	1969	1580	1727	1962	2403	4018	2808	1877	3919	6286	6882
ATCGAAAGGATGGGAGTACTAAGCTGTTTAAATTTCGCGCACCACTAGGTGGCGCCCTCTTGTGGGCGGAAACGCCGCACTTCCGCTGTCTCGCGCACCACTAGGTGGCGCTAAACCGCGAAGCAGTCAGCACGGACAAAGTACTGAGAT	GTTTAAATTTCGCGCACCACTAGGTGGCGCCCTCTTGTGGGCGGAAACGCCGCACTTCCGCTGTCTCGCGCACCACTAGGTGGCGCTAAACCGCGAAGCA	cat1	universal open	N	9.36164	985	1197	485	933	1390	1454	1261	1526	7140	6282	3364	5353	3904	4659
ATCGAAAGGATGGGAGTACTAAGCTGGCGGAAACGCCGCACTTCCGCTGTCTCGCGCACCACTAGGTGGCGCCCTCTTGTGGGCGGAAACGCCGCACTTCCGGCAACAACCGCTAGGCGGAGCATGTCAGCACGGACAAAGTACTGAGAT	GGCGGAAACGCCGCACTTCCGCTGTCTCGCGCACCACTAGGTGGCGCCCTCTTGTGGGCGGAAACGCCGCACTTCCGGCAACAACCGCTAGGCGGAGCAT	cat1	universal open	N	9.35593	1634	1448	855	2651	1711	1693	1620	1848	5408	4001	3667	4593	7047	6830
ATCGAAAGGATGGGAGTACTAAGCTTTCCGCTGTCTCGCGCACCACTAGGTGGCGCCACTAGAGGGCGGAAACGCCGCACTTCCGCTGTCTCGCGCACCACTAGGTGGCGCTAAACCGCGAAGCTGTCAGCACGGACAAAGTACTGAGAT	TTCCGCTGTCTCGCGCACCACTAGGTGGCGCCACTAGAGGGCGGAAACGCCGCACTTCCGCTGTCTCGCGCACCACTAGGTGGCGCTAAACCGCGAAGCT	cat1	universal open	N	9.34057	780	1201	1288	825	1919	2009	1466	1846	6492	4780	6235	6421	8437	9554
ATCGAAAGGATGGGAGTACTAAGCTCTAGGTGGCGCTAAACCGCGTTTAAATTTCGCGCACCACTAGGTGGCGCTAGGCGGAAACGCCGCACTTCCGCCTCTCGCGAGTAAAAGGGGCGGAGCAGGTCAGCACGGACAAAGTACTGAGAT	CTAGGTGGCGCTAAACCGCGTTTAAATTTCGCGCACCACTAGGTGGCGCTAGGCGGAAACGCCGCACTTCCGCCTCTCGCGAGTAAAAGGGGCGGAGCAG	cat1	universal open	N	9.33627	1118	1288	955	987	1295	1511	1382	1678	6027	5273	7623	6474	6215	7764
ATCGAAAGGATGGGAGTACTAAGCTGGTGGCGCTAAACCGCGAAAACGTTCGCGCACCACTAGGTGGCGCCACTAGAGGGCGGAAACGCCGCACTTCCGCTTCCGGCAACAACCGCTAGGCGGGTGTCAGCACGGACAAAGTACTGAGAT	GGTGGCGCTAAACCGCGAAAACGTTCGCGCACCACTAGGTGGCGCCACTAGAGGGCGGAAACGCCGCACTTCCGCTTCCGGCAACAACCGCTAGGCGGGT	cat1	universal open	N	9.32032	975	1185	647	1097	1857	1888	1881	2260	6583	5593	5467	4805	6864	7841
ATCGAAAGGATGGGAGTACTAAGCTTTCGCGTTTAAATTTCGCGACTAGCGCCACTAGAGGGCGGAAACGCCGCACTTCCGCTTCCGGCAACAACCGCTAGGCTCCGCCCTCTTGTGGGCGGGTCGTCAGCACGGACAAAGTACTGAGAT	TTCGCGTTTAAATTTCGCGACTAGCGCCACTAGAGGGCGGAAACGCCGCACTTCCGCTTCCGGCAACAACCGCTAGGCTCCGCCCTCTTGTGGGCGGGTC	cat1	universal open	N	9.28238	813	866	412	808	1340	1664	891	1382	4248	4204	2772	5897	4306	4310
ATCGAAAGGATGGGAGTACTAAGCTATTTCGCGTTTAAATTTCGCGAAAACGTTCGCGCACCACTAGGTGGCGCTAAACCGCGTTTAAATTTCGCGCACCACTAGGTGGCGCCACTAGAGGGCGCGTCAGCACGGACAAAGTACTGAGAT	ATTTCGCGTTTAAATTTCGCGAAAACGTTCGCGCACCACTAGGTGGCGCTAAACCGCGTTTAAATTTCGCGCACCACTAGGTGGCGCCACTAGAGGGCGC	cat1	universal open	N	9.27091	1422	1438	1044	1043	1479	1236	619	1606	6184	4884	5994	7862	3176	3370
ATCGAAAGGATGGGAGTACTAAGCTGCTAGGCGGAAACGCCGCACTTCCGCTTCCGGCAACAACCGCTAGGCGGAAACGCCGCACTTCCGCCTAACGCGACTAGCGCCACTAGAGGGCGGAGCCAGTCAGCACGGACAAAGTACTGAGAT	GCTAGGCGGAAACGCCGCACTTCCGCTTCCGGCAACAACCGCTAGGCGGAAACGCCGCACTTCCGCCTAACGCGACTAGCGCCACTAGAGGGCGGAGCCA	cat1	universal open	N	9.26956	2636	2497	2495	3947	2733	2701	1812	2541	11059	7227	11734	11092	7805	9490
ATCGAAAGGATGGGAGTACTAAGCTGGCCTCCGAAAGCAGAGCCGGGCCGCCGGTTCTGAGCTCTGAGTTGCCGCCGCCGCCGCCGCCGCCGCCGCCGCCGCCGCCGCCGCCGCGCCCCTCCGTAGTCAGCACGGACAAAGTACTGAGAT	GGCCTCCGAAAGCAGAGCCGGGCCGCCGGTTCTGAGCTCTGAGTTGCCGCCGCCGCCGCCGCCGCCGCCGCCGCCGCCGCCGCCGCCGCGCCCCTCCGTA	cat2	universal neutral	N	0.799731	4656	6977	4350	3548	6465	6905	4594	3691	9069	9482	3034	5413	15582	15969
ATCGAAAGGATGGGAGTACTAAGCTCGCCGCCGCCGCCGCCGTCGCCGCCGCCGCCGCCGCCACCGCCGCCACCACCGCCACCACGGACCCCTCCACTGGGCCGCTGCCGCCGAGAGGAGCCGCGGTCAGCACGGACAAAGTACTGAGAT	CGCCGCCGCCGCCGCCGTCGCCGCCGCCGCCGCCGCCACCGCCGCCACCACCGCCACCACGGACCCCTCCACTGGGCCGCTGCCGCCGAGAGGAGCCGCG	cat2	universal neutral	N	0.850537	287	442	533	455	273	357	357	298	1088	778	337	596	853	867
ATCGAAAGGATGGGAGTACTAAGCTGTCTTACTGACAACTCGTTTGTGTGAACTGATAATAGTAAGCCTGTTCAAACTAAGGTCCAGGGAGTGAAGAAATTATGCGTCGTTCTGTGATCGGCTATGTCAGCACGGACAAAGTACTGAGAT	GTCTTACTGACAACTCGTTTGTGTGAACTGATAATAGTAAGCCTGTTCAAACTAAGGTCCAGGGAGTGAAGAAATTATGCGTCGTTCTGTGATCGGCTAT	cat2	universal neutral	N	0.869539	1236	666	143	238	1841	1556	811	1744	283	134	25	66	240	180
ATCGAAAGGATGGGAGTACTAAGCTGGCGGCCTGCACTGCGCCGCCGCGGCCGCCCTGGGAGCCGGCCCTGCCGCGACCCCGGCCCCCGCCGCGGCCTCCTCGCTGGCTCCGGTTCAGCTTAATGGTCAGCACGGACAAAGTACTGAGAT	GGCGGCCTGCACTGCGCCGCCGCGGCCGCCCTGGGAGCCGGCCCTGCCGCGACCCCGGCCCCCGCCGCGGCCTCCTCGCTGGCTCCGGTTCAGCTTAATG	cat2	universal neutral	N	0.875339	2089	2912	2110	2284	2451	3024	3053	2444	6401	5084	3283	4362	7817	8513
ATCGAAAGGATGGGAGTACTAAGCTAAGACCCACTGTCCTGAGATTAACTCGATGCTAGAGTCAATCGCCGCGTCCCCCAACATCTCAATATTGGCCGGCATACTCGACTTTAATACGGTACCAGGTCAGCACGGACAAAGTACTGAGAT	AAGACCCACTGTCCTGAGATTAACTCGATGCTAGAGTCAATCGCCGCGTCCCCCAACATCTCAATATTGGCCGGCATACTCGACTTTAATACGGTACCAG	cat2	universal neutral	N	0.884256	2079	1752	1246	2528	2684	3073	1820	2890	1807	1438	2070	1639	1516	1575
ATCGAAAGGATGGGAGTACTAAGCTCTGAAGCAGGTTTAGGATGTATGCAATGTCGAGGTCCGACATCCAGGAATTATAATAGGGGCATCTGTAAAACACGAATGGTGTCCGGTCCTTGCCGTCAGTCAGCACGGACAAAGTACTGAGAT	CTGAAGCAGGTTTAGGATGTATGCAATGTCGAGGTCCGACATCCAGGAATTATAATAGGGGCATCTGTAAAACACGAATGGTGTCCGGTCCTTGCCGTCA	cat2	universal neutral	N	0.887777	1256	862	438	573	2914	3239	1217	2114	707	793	569	532	1284	1271
ATCGAAAGGATGGGAGTACTAAGCTAGCTCACGAAGGGGCAGCGGACCGGCCCCACTCACCATAGCTGTCATCGTCCTCCATGGTGCTGGCGACCGGCTCCGGCCCGCGACCGCCACTGACCTCCGTCAGCACGGACAAAGTACTGAGAT	AGCTCACGAAGGGGCAGCGGACCGGCCCCACTCACCATAGCTGTCATCGTCCTCCATGGTGCTGGCGACCGGCTCCGGCCCGCGACCGCCACTGACCTCC	cat2	universal neutral	N	0.893313	6319	5792	4391	5078	8234	8862	6012	6975	6112	4038	3710	4437	4591	4384
ATCGAAAGGATGGGAGTACTAAGCTACCGAAGCCCGCGGCGTCCCCAACACCCTCCGCTCACCCAGAAATTCTCCACGAAATGCGCCATGACCATCTTGCCGCCGCCGCCGCCGCCGCCGCCGCCGTCAGCACGGACAAAGTACTGAGAT	ACCGAAGCCCGCGGCGTCCCCAACACCCTCCGCTCACCCAGAAATTCTCCACGAAATGCGCCATGACCATCTTGCCGCCGCCGCCGCCGCCGCCGCCGCC	cat2	universal neutral	N	0.894147	6789	7005	6504	8212	6650	6513	7935	7295	11479	9278	7565	9270	10892	11103
ATCGAAAGGATGGGAGTACTAAGCTTCTCTGTGGACTATGGACTCAGGCTCAGGCACATGCTCCTCCTCTCTGTGAACTATGGGCTCAGGTGCATGCCCCTCATCTCTGTGGACTATGGGCTCAGGTCAGCACGGACAAAGTACTGAGAT	TCTCTGTGGACTATGGACTCAGGCTCAGGCACATGCTCCTCCTCTCTGTGAACTATGGGCTCAGGTGCATGCCCCTCATCTCTGTGGACTATGGGCTCAG	cat2	universal neutral	N	0.907797	844	445	287	442	992	1223	829	759	774	646	496	759	691	671
ATCGAAAGGATGGGAGTACTAAGCTCCCAAACCCCCCCCCGTCCCTTAACCTGGCCAGGCCCCAGACGGAGCAGACATACGCAGCGGCCGCGCCCCATCACCTCTTCGCAGCCGCTCGGGGGTCGGTCAGCACGGACAAAGTACTGAGAT	CCCAAACCCCCCCCCGTCCCTTAACCTGGCCAGGCCCCAGACGGAGCAGACATACGCAGCGGCCGCGCCCCATCACCTCTTCGCAGCCGCTCGGGGGTCG	cat2	universal neutral	N	0.911224	0	0	0	0	0	0	0	0	0	0	0	0	0	0
ATCGAAAGGATGGGAGTACTAAGCTTCTTACATCGATATCAAGCATGCACTAGTATCTTGTCAGAGGGAACTTGATGGACTAGATGACGAGCCACTCACTGTCTGAAGCACAATTCTAACCCCATGTCAGCACGGACAAAGTACTGAGAT	TCTTACATCGATATCAAGCATGCACTAGTATCTTGTCAGAGGGAACTTGATGGACTAGATGACGAGCCACTCACTGTCTGAAGCACAATTCTAACCCCAT	cat2	universal neutral	N	0.919433	1997	1306	1376	2107	3604	4235	2083	3571	1601	1685	1732	2207	1437	1655
ATCGAAAGGATGGGAGTACTAAGCTGGTGAGGAAGACACTGGCATCGACGTAACTCTTGCTTCCACATGCAAGCACATACAGGCTTACCCAGAAATTCATGCCTGTGCATGCACGCATGTGCACGGTCAGCACGGACAAAGTACTGAGAT	GGTGAGGAAGACACTGGCATCGACGTAACTCTTGCTTCCACATGCAAGCACATACAGGCTTACCCAGAAATTCATGCCTGTGCATGCACGCATGTGCACG	cat2	universal neutral	N	0.92244	4918	4303	3017	3104	5689	5972	2329	2319	3505	2820	3280	3509	1552	1876
ATCGAAAGGATGGGAGTACTAAGCTTGCAGCTGCCGCCGCCGCGCCCGGTCCATCCCCACCCCGACCACCCCCCCCTCCCGGCCCGCCCCCCGCGCCGCCTCAGCCGCTGCCGCCGCCGCCTCCGGTCAGCACGGACAAAGTACTGAGAT	TGCAGCTGCCGCCGCCGCGCCCGGTCCATCCCCACCCCGACCACCCCCCCCTCCCGGCCCGCCCCCCGCGCCGCCTCAGCCGCTGCCGCCGCCGCCTCCG	cat2	universal neutral	N	0.924051	0	0	0	0	0	0	0	0	0	0	0	0	0	0
ATCGAAAGGATGGGAGTACTAAGCTCCTGTATCTGGGCCCAATTGTGCCTACCAATTGGAGTTCTTGTTGTCAAAACAATGGAGGAGGCTCTTCTGCCCAAATGGTTCCTGTGATTATTATTTAGGTCAGCACGGACAAAGTACTGAGAT	CCTGTATCTGGGCCCAATTGTGCCTACCAATTGGAGTTCTTGTTGTCAAAACAATGGAGGAGGCTCTTCTGCCCAAATGGTTCCTGTGATTATTATTTAG	cat2	universal neutral	N	0.928801	1400	984	859	1452	1466	1621	1567	1088	1038	739	1571	1589	1053	656
ATCGAAAGGATGGGAGTACTAAGCTGCGGGCTCAGGACTACGCTCACACCAGCTCGGCCAGGCCCGGTTCCCCGGCGCCGCCCGCGCCCCGGCTTCTCCGTACCTCGTAAAGGTCCCCAGAAGCCGTCAGCACGGACAAAGTACTGAGAT	GCGGGCTCAGGACTACGCTCACACCAGCTCGGCCAGGCCCGGTTCCCCGGCGCCGCCCGCGCCCCGGCTTCTCCGTACCTCGTAAAGGTCCCCAGAAGCC	cat2	universal neutral	N	0.931518	4266	4420	4554	3807	7559	7603	5770	7985	7432	6387	4933	3976	13675	12797
ATCGAAAGGATGGGAGTACTAAGCTGGCGCCGGGGCGGCGGCGGCGGCGGCTGCGGCGGTGGCGTCGGCAGCGGCGGCGGCTCCTCCGGCTCCCCCCGGTGCAGAGACCATCCCTCTCCCCCAGGGTCAGCACGGACAAAGTACTGAGAT	GGCGCCGGGGCGGCGGCGGCGGCGGCTGCGGCGGTGGCGTCGGCAGCGGCGGCGGCTCCTCCGGCTCCCCCCGGTGCAGAGACCATCCCTCTCCCCCAGG	cat2	universal neutral	N	0.93665	2556	3228	2850	4396	3555	3566	4119	3171	9399	8308	7458	10242	9607	10497
ATCGAAAGGATGGGAGTACTAAGCTAACCACTGGGCACACAGACTGCAAAGGCGCCCGGGACGTAAGGTTTACCATAACTTCACGTATCTGCCCGTGACTGGATATCCCTCACAATTACCAACTGGTCAGCACGGACAAAGTACTGAGAT	AACCACTGGGCACACAGACTGCAAAGGCGCCCGGGACGTAAGGTTTACCATAACTTCACGTATCTGCCCGTGACTGGATATCCCTCACAATTACCAACTG	cat2	universal neutral	N	0.940482	2162	2017	855	1173	3495	3736	1957	2998	1206	1287	1418	1173	1297	1371
ATCGAAAGGATGGGAGTACTAAGCTAACGTAGGTGATATCTTGGGGGTACCTAGTCTCCAAGCCTCGTGAGTTAGATGCCCAGGCATCTGCAATTCGACAATTTGCATCCCGGACCGTCTCAAAGGTCAGCACGGACAAAGTACTGAGAT	AACGTAGGTGATATCTTGGGGGTACCTAGTCTCCAAGCCTCGTGAGTTAGATGCCCAGGCATCTGCAATTCGACAATTTGCATCCCGGACCGTCTCAAAG	cat2	universal neutral	N	0.944089	2218	1692	1060	1124	2359	3129	1510	2088	1427	1096	1224	784	721	963
ATCGAAAGGATGGGAGTACTAAGCTGTCGCCGGAGGATCCCCCTTCCCGACACGAGCACGCGCGTCCCGTGGAACTCGAGTCTTTGGACGAGCTTGGGGAGCCCGTGCCTGTGCCGCCCGGGGTCGTCAGCACGGACAAAGTACTGAGAT	GTCGCCGGAGGATCCCCCTTCCCGACACGAGCACGCGCGTCCCGTGGAACTCGAGTCTTTGGACGAGCTTGGGGAGCCCGTGCCTGTGCCGCCCGGGGTC	cat2	universal neutral	N	0.95292	2442	2404	2306	3856	5623	5995	3135	3689	2290	2115	1746	1864	3172	3587
ATCGAAAGGATGGGAGTACTAAGCTGCGCACCGGTCTCGGCCGCAACGCCGAGGCCGGGGGACGCTGCCCACGAACCCCCTCGGGGTCTCTAAGGCCTTCCTCCGCGGGCCGTCCTGTCCGGGATGTCAGCACGGACAAAGTACTGAGAT	GCGCACCGGTCTCGGCCGCAACGCCGAGGCCGGGGGACGCTGCCCACGAACCCCCTCGGGGTCTCTAAGGCCTTCCTCCGCGGGCCGTCCTGTCCGGGAT	cat2	universal neutral	N	0.954216	4960	5347	6029	5586	10900	11016	9627	9296	6409	5665	4483	5914	6675	6699
ATCGAAAGGATGGGAGTACTAAGCTTTATGCACTTAACATTGACGGATATTTGGCAAGCCAACAGCCCGTCCCGGAGTACCCTAGAGATTGCTGGCAATCCGTCGATTCCATTTTACCTTGAGTTGTCAGCACGGACAAAGTACTGAGAT	TTATGCACTTAACATTGACGGATATTTGGCAAGCCAACAGCCCGTCCCGGAGTACCCTAGAGATTGCTGGCAATCCGTCGATTCCATTTTACCTTGAGTT	cat2	universal neutral	N	0.9544	1472	1130	1739	1583	3117	3296	1682	2153	1325	698	2241	2824	1480	1707
ATCGAAAGGATGGGAGTACTAAGCTGAGGCCCCCCTGGGCATCGTCCCTATCAGATCAAATTTTTCTCGATCTTGACGGCGCGGCCCCGCCGCATTTGTGCTAATAAGATGATTGCAATAGTACTGTCAGCACGGACAAAGTACTGAGAT	GAGGCCCCCCTGGGCATCGTCCCTATCAGATCAAATTTTTCTCGATCTTGACGGCGCGGCCCCGCCGCATTTGTGCTAATAAGATGATTGCAATAGTACT	cat2	universal neutral	N	0.954579	2549	2394	1773	2043	2576	2368	1672	1382	270	425	4	1	305	209
ATCGAAAGGATGGGAGTACTAAGCTTTTTTCTTTTTGAACCGTATTCCATAAGTCAAAGATATCTACTTCCAAATCTCACTCTGACCCACTTTTCCACTTTCTCCCCCCTTTGCACTTTTACGTTGTCAGCACGGACAAAGTACTGAGAT	TTTTTCTTTTTGAACCGTATTCCATAAGTCAAAGATATCTACTTCCAAATCTCACTCTGACCCACTTTTCCACTTTCTCCCCCCTTTGCACTTTTACGTT	cat2	universal neutral	N	0.955015	2424	1345	886	2155	2385	3202	889	1218	1430	1961	2770	5161	271	452
ATCGAAAGGATGGGAGTACTAAGCTTGTCATTGCTGTATGTGGTTACGACGTTCCAGATTATGTAGCGAATCATGCCAGGAAATATTTCTCGCCTCATGATATAGCGTACCAGAATTTTTGAGCTGTCAGCACGGACAAAGTACTGAGAT	TGTCATTGCTGTATGTGGTTACGACGTTCCAGATTATGTAGCGAATCATGCCAGGAAATATTTCTCGCCTCATGATATAGCGTACCAGAATTTTTGAGCT	cat2	universal neutral	N	0.956776	2360	1713	1197	2173	3752	4425	2329	3164	2087	2042	1309	2315	1151	1630
ATCGAAAGGATGGGAGTACTAAGCTGACAAAGTCTAATAAATTCAGCTCACACCCCCCCCCCCCCCCCTTGCAGTCTGCTTGCTCAGGGCCTATAGAATCAGCACATGCACTCTGTGTGGCTCTAGTCAGCACGGACAAAGTACTGAGAT	GACAAAGTCTAATAAATTCAGCTCACACCCCCCCCCCCCCCCCTTGCAGTCTGCTTGCTCAGGGCCTATAGAATCAGCACATGCACTCTGTGTGGCTCTA	cat2	universal neutral	N	0.958208	0	0	0	0	0	0	0	0	0	0	0	0	0	0
ATCGAAAGGATGGGAGTACTAAGCTAGCTGTTTTTGACATGTTTTATCACACGTGGATAGGTAAACTATGGAAGAAGCCGTGATGGGGCATCTCGATTGTTGGTAGGAGTACATGTGAAGTTTTAGTCAGCACGGACAAAGTACTGAGAT	AGCTGTTTTTGACATGTTTTATCACACGTGGATAGGTAAACTATGGAAGAAGCCGTGATGGGGCATCTCGATTGTTGGTAGGAGTACATGTGAAGTTTTA	cat2	universal neutral	N	0.958948	1368	899	781	1882	2152	2655	1559	1836	959	692	1192	2846	363	455
ATCGAAAGGATGGGAGTACTAAGCTGCTACTCCCACAATTTTGGGGAGTACACCGTGACAGCGTAGCTCCCAAGTATGTTCCTCCTGCCGTCCCGCGGCGTCTCCTTAGAGAGATTTCTAGGATGGTCAGCACGGACAAAGTACTGAGAT	GCTACTCCCACAATTTTGGGGAGTACACCGTGACAGCGTAGCTCCCAAGTATGTTCCTCCTGCCGTCCCGCGGCGTCTCCTTAGAGAGATTTCTAGGATG	cat2	universal neutral	N	0.959311	2999	2486	2100	3221	3410	3724	1520	2320	3162	1855	2620	5035	1854	1949
ATCGAAAGGATGGGAGTACTAAGCTCCCAACGCCCTGAGCCCGCGCCTCCGCGGCCGCGGCCCGAGCCCCGCACTCACCGGCCACCACTGGGCGCGCGAGGCTGAGGCAGATAGAAGGCAGCGGGGTCAGCACGGACAAAGTACTGAGAT	CCCAACGCCCTGAGCCCGCGCCTCCGCGGCCGCGGCCCGAGCCCCGCACTCACCGGCCACCACTGGGCGCGCGAGGCTGAGGCAGATAGAAGGCAGCGGG	cat2	universal neutral	N	0.96092	2845	4012	3882	5097	2948	2650	3633	3410	6224	5081	5688	7259	7357	7421
ATCGAAAGGATGGGAGTACTAAGCTGTGAAGGATAATATGTTAGTATCTCCTAGGGTCCATGACTCCCCATTTCAACTGCCCAGTTGCGAGGACTTTGAACGTATTTCACTGGACCCAGATAAGGGTCAGCACGGACAAAGTACTGAGAT	GTGAAGGATAATATGTTAGTATCTCCTAGGGTCCATGACTCCCCATTTCAACTGCCCAGTTGCGAGGACTTTGAACGTATTTCACTGGACCCAGATAAGG	cat2	universal neutral	N	0.961138	2263	1760	1159	1773	2317	2609	1268	1012	1631	1280	1760	2004	594	620
ATCGAAAGGATGGGAGTACTAAGCTGCTGGCGTAATAATCATCTGCTGATGGACACTAGAAGAAGCGATCATAGGGTCGACAGTGAGAGCGCGGCGTAGACGCTCTGGCTTTAGCCCGTTCATCAGTCAGCACGGACAAAGTACTGAGAT	GCTGGCGTAATAATCATCTGCTGATGGACACTAGAAGAAGCGATCATAGGGTCGACAGTGAGAGCGCGGCGTAGACGCTCTGGCTTTAGCCCGTTCATCA	cat2	universal neutral	N	0.964464	3818	2592	2706	2563	5296	5695	2876	2912	415	732	528	361	354	560
ATCGAAAGGATGGGAGTACTAAGCTCGCGCGGGTAGCTTCCTGAGTTATACTATGGGCAGAAAATCGTAGAGCAATTCCCTAGGCCCCCACGGCTTGACCCGGTAGGGTACACCCCCACTTGCCAGTCAGCACGGACAAAGTACTGAGAT	CGCGCGGGTAGCTTCCTGAGTTATACTATGGGCAGAAAATCGTAGAGCAATTCCCTAGGCCCCCACGGCTTGACCCGGTAGGGTACACCCCCACTTGCCA	cat2	universal neutral	N	0.96793	2220	2068	1719	2191	3163	3587	2029	3214	3151	3140	2206	2578	1971	2031
ATCGAAAGGATGGGAGTACTAAGCTCCAGGCTGAGCACCTCGGGCCGTTCGCGCTGCAGGGCTCCTTCCTCGCTATCCCGGGTGTCCTCCTCCTCCGCATCCTCCTCCTCATCCTCCTCCTGGATGTCAGCACGGACAAAGTACTGAGAT	CCAGGCTGAGCACCTCGGGCCGTTCGCGCTGCAGGGCTCCTTCCTCGCTATCCCGGGTGTCCTCCTCCTCCGCATCCTCCTCCTCATCCTCCTCCTGGAT	cat2	universal neutral	N	0.96807	6490	6349	4454	6166	7510	8582	6091	7798	8262	6002	4309	6396	6633	7178
ATCGAAAGGATGGGAGTACTAAGCTGCATCGTGTGCCATGCACATGCCCAGCACTGGTACTGTGCAGTGTGTGCCATGTGCATGCCCAGCACTGGTACTGTGCAGTGTGTGCCATGTGCATGCCCGTCAGCACGGACAAAGTACTGAGAT	GCATCGTGTGCCATGCACATGCCCAGCACTGGTACTGTGCAGTGTGTGCCATGTGCATGCCCAGCACTGGTACTGTGCAGTGTGTGCCATGTGCATGCCC	cat2	universal neutral	N	0.969077	6990	6179	5656	4652	8817	10037	5286	6808	3911	4584	6076	5315	2426	2526
ATCGAAAGGATGGGAGTACTAAGCTGGTACGCGGGGCTCCAGAAAGTCTTTTTGCAAAACGGGCAGCTGTCGTGGGCTGGAGCAGCGGGTTGAGCTTAAGGAACACACGACGGGGGCCTCGGGGTGTCAGCACGGACAAAGTACTGAGAT	GGTACGCGGGGCTCCAGAAAGTCTTTTTGCAAAACGGGCAGCTGTCGTGGGCTGGAGCAGCGGGTTGAGCTTAAGGAACACACGACGGGGGCCTCGGGGT	cat2	universal neutral	N	0.972823	2481	2001	1735	2311	2267	2327	939	1924	2398	2110	1891	2554	1351	1166
ATCGAAAGGATGGGAGTACTAAGCTGATGATAGTGAGCATTTTGAGAACCCACCGTGTCCTACTAAGGTTTGGTCCGGTACACTCTGTTGTCACGCTTCGATGGCCGTTGTGGACGCGTGGCGAAGTCAGCACGGACAAAGTACTGAGAT	GATGATAGTGAGCATTTTGAGAACCCACCGTGTCCTACTAAGGTTTGGTCCGGTACACTCTGTTGTCACGCTTCGATGGCCGTTGTGGACGCGTGGCGAA	cat2	universal neutral	N	0.976304	2837	2326	2087	3439	4630	4992	3811	4890	2359	1832	2499	3184	1859	1930
ATCGAAAGGATGGGAGTACTAAGCTGACAGTGGGCAACACATACAATGTTGTAAGACACGCAGATTATCAAAGCGCTGCGATAGCCGTGAACTCATCCGGTCCTTTGGTAAAACGGCATAGGGGTGTCAGCACGGACAAAGTACTGAGAT	GACAGTGGGCAACACATACAATGTTGTAAGACACGCAGATTATCAAAGCGCTGCGATAGCCGTGAACTCATCCGGTCCTTTGGTAAAACGGCATAGGGGT	cat2	universal neutral	N	0.977161	1289	947	979	1503	2699	3325	1839	1503	974	1043	878	1772	1113	1058
ATCGAAAGGATGGGAGTACTAAGCTCAGGAGGTGTGACCCCCCCCCCCCCCCCGCAGGCCTAGGGACCCAGGCCCATGGCACTCGCCATGGAGTCCTGGGCTCACAGCCAGGCTTCCGTTTTAGAGTCAGCACGGACAAAGTACTGAGAT	CAGGAGGTGTGACCCCCCCCCCCCCCCCGCAGGCCTAGGGACCCAGGCCCATGGCACTCGCCATGGAGTCCTGGGCTCACAGCCAGGCTTCCGTTTTAGA	cat2	universal neutral	N	0.979445	0	0	0	0	0	0	0	0	0	0	0	0	0	0
ATCGAAAGGATGGGAGTACTAAGCTTACCTGTAATTATTGAAAGGCCTAATATCTAGAAATCTGCTGAAAAAAGCTGAATCTGATACCGGTATCATGGGGGGTATACACCCCAATCGAGACGCTTGTCAGCACGGACAAAGTACTGAGAT	TACCTGTAATTATTGAAAGGCCTAATATCTAGAAATCTGCTGAAAAAAGCTGAATCTGATACCGGTATCATGGGGGGTATACACCCCAATCGAGACGCTT	cat2	universal neutral	N	0.981223	123	90	56	26	816	787	430	364	117	83	2	89	107	234
ATCGAAAGGATGGGAGTACTAAGCTGACGTACGGGGTTCGTGTGGCATAACCTATACCACGACCGTAGGACAGTAGCTCTGAGCGATTTCTCCGAGTATAAGTCAATCTGCAATGTGGCCGGGGAGTCAGCACGGACAAAGTACTGAGAT	GACGTACGGGGTTCGTGTGGCATAACCTATACCACGACCGTAGGACAGTAGCTCTGAGCGATTTCTCCGAGTATAAGTCAATCTGCAATGTGGCCGGGGA	cat2	universal neutral	N	0.981227	2737	2291	2371	3766	3160	3009	2482	2776	2294	2034	2719	4035	1078	1485
ATCGAAAGGATGGGAGTACTAAGCTATGCACGGGTCCCCAAGTTTGTAATCTACCTCCTACGTCCGCATATTACTATCTAGGTCCAAATGCCTTACATGGTATAACCTACGTACCTTCCATATGTGTCAGCACGGACAAAGTACTGAGAT	ATGCACGGGTCCCCAAGTTTGTAATCTACCTCCTACGTCCGCATATTACTATCTAGGTCCAAATGCCTTACATGGTATAACCTACGTACCTTCCATATGT	cat2	universal neutral	N	0.982408	1841	1165	483	1465	4258	4411	3009	4072	1296	1002	677	1578	1248	1239
ATCGAAAGGATGGGAGTACTAAGCTAGAGAGTCAGTTCGGTTGTGCAGTTTGGGTCCGGTCCAGGGTTGCGAGGTGATGGAGCGATACCTTTGGGGTTTCATAGGTATTTTAAAAATCTCTTGTTGTCAGCACGGACAAAGTACTGAGAT	AGAGAGTCAGTTCGGTTGTGCAGTTTGGGTCCGGTCCAGGGTTGCGAGGTGATGGAGCGATACCTTTGGGGTTTCATAGGTATTTTAAAAATCTCTTGTT	cat2	universal neutral	N	0.982809	741	868	237	619	794	898	178	317	512	518	259	582	502	506
ATCGAAAGGATGGGAGTACTAAGCTGGCATGTCTACGTCGCACCCATCTTCAGCAATTTGGGGAAGACGAAAGCTACTTGTTCTGAGGGGTTCCCAATAAATCACCGTATGAAGTCTGGACGACAGTCAGCACGGACAAAGTACTGAGAT	GGCATGTCTACGTCGCACCCATCTTCAGCAATTTGGGGAAGACGAAAGCTACTTGTTCTGAGGGGTTCCCAATAAATCACCGTATGAAGTCTGGACGACA	cat2	universal neutral	N	0.983678	2138	1740	297	1209	1870	1767	1031	1699	1649	1403	676	2108	858	690
ATCGAAAGGATGGGAGTACTAAGCTCACCCTTTAGGGTCGGTGGACTTTCGTTGAAAGTCATTAACTCAGAGCCACCTGAAGATTGAGTGCACGCTCGACAATATGCAAGGTAAGCTAACAGGCTGTCAGCACGGACAAAGTACTGAGAT	CACCCTTTAGGGTCGGTGGACTTTCGTTGAAAGTCATTAACTCAGAGCCACCTGAAGATTGAGTGCACGCTCGACAATATGCAAGGTAAGCTAACAGGCT	cat2	universal neutral	N	0.983903	1707	1400	399	390	2621	3287	2258	2845	967	644	178	1101	1667	1494
ATCGAAAGGATGGGAGTACTAAGCTTGGCGTCCAGCTGCCCCGATTCCATTGCGAACAATGACAGCGTGGACTCACCTACATGGAATACCTGCGTTTGCACCGCACTCTTGCATTTATAAGAAGGGTCAGCACGGACAAAGTACTGAGAT	TGGCGTCCAGCTGCCCCGATTCCATTGCGAACAATGACAGCGTGGACTCACCTACATGGAATACCTGCGTTTGCACCGCACTCTTGCATTTATAAGAAGG	cat2	universal neutral	N	0.984806	1664	1169	1524	1534	2424	2323	1314	1632	1998	1571	2727	1712	1753	1484
ATCGAAAGGATGGGAGTACTAAGCTGCCGTGTCAAGCATAGTATAGTTGCCGAACGAGATCGTACTAGTACGCAATGGTCGAATCTTTCGGTTTGTCTGGATACCAAAGACCCTCCTTCGTTGATGTCAGCACGGACAAAGTACTGAGAT	GCCGTGTCAAGCATAGTATAGTTGCCGAACGAGATCGTACTAGTACGCAATGGTCGAATCTTTCGGTTTGTCTGGATACCAAAGACCCTCCTTCGTTGAT	cat2	universal neutral	N	0.984828	2798	2105	1769	1511	5337	5856	4067	6020	857	822	187	170	844	1028
ATCGAAAGGATGGGAGTACTAAGCTCTTTTGATTCCTATTTTTGTCTGGCTTCAAGCTGCACCAAAGGGGCACCTCAGTATCTCTATATAGGCAATCTAGATTACCTTCTTCTGCAACCCTCCTAGTCAGCACGGACAAAGTACTGAGAT	CTTTTGATTCCTATTTTTGTCTGGCTTCAAGCTGCACCAAAGGGGCACCTCAGTATCTCTATATAGGCAATCTAGATTACCTTCTTCTGCAACCCTCCTA	cat2	universal neutral	N	0.985398	1135	1118	767	1635	2039	2614	485	1795	1257	1411	1453	2335	674	862
ATCGAAAGGATGGGAGTACTAAGCTCGTGAGATGCGCTCGGATGCGCGTGGTGGTAAAGCTCCACATCGTATCAAGAACACGCGTCCCGTCCATACTAAACCTCGAGTACAGGGTCTACTACCGTGTCAGCACGGACAAAGTACTGAGAT	CGTGAGATGCGCTCGGATGCGCGTGGTGGTAAAGCTCCACATCGTATCAAGAACACGCGTCCCGTCCATACTAAACCTCGAGTACAGGGTCTACTACCGT	cat2	universal neutral	N	0.986139	2892	3126	3143	4182	3989	4213	1661	2111	3542	3397	5423	4397	2396	2305
ATCGAAAGGATGGGAGTACTAAGCTGGCTCGTCGCTCACGGCCCTACGGGAGGCCCCAGCTCTGCTCACCGTGAAGGGGACGTCCCCGACGCTGCCCACCGAATAGCAGTTGTCCCCAGGGTTGAGTCAGCACGGACAAAGTACTGAGAT	GGCTCGTCGCTCACGGCCCTACGGGAGGCCCCAGCTCTGCTCACCGTGAAGGGGACGTCCCCGACGCTGCCCACCGAATAGCAGTTGTCCCCAGGGTTGA	cat2	universal neutral	N	0.992003	5455	5205	6314	6934	5816	6196	3179	3950	4594	3803	6416	6298	4179	4222
ATCGAAAGGATGGGAGTACTAAGCTAGGGTCTACCCCCGAGGTGGCCGACGATTCTGGACTCAGTGGGGATTAATAATAACCGCTTTAACCAGAGCATGTGATTTTTACTAAACGCCTGGACGTTGTCAGCACGGACAAAGTACTGAGAT	AGGGTCTACCCCCGAGGTGGCCGACGATTCTGGACTCAGTGGGGATTAATAATAACCGCTTTAACCAGAGCATGTGATTTTTACTAAACGCCTGGACGTT	cat2	universal neutral	N	0.992324	1840	1366	974	1176	1813	2022	790	1490	1454	1484	1464	1747	929	1043
ATCGAAAGGATGGGAGTACTAAGCTCGCCAGCGCCCCCCGGCCACTCGGGACCCCGGGCCGCGACGAGCCTCCCGCCGCCCGCGGGGAAAGTTGCGCCCCGACTCACCCGCCAACCCCGGGCGCGGTCAGCACGGACAAAGTACTGAGAT	CGCCAGCGCCCCCCGGCCACTCGGGACCCCGGGCCGCGACGAGCCTCCCGCCGCCCGCGGGGAAAGTTGCGCCCCGACTCACCCGCCAACCCCGGGCGCG	cat2	universal neutral	N	0.992732	4482	5304	7851	6716	4136	4881	3712	4992	11192	7321	8111	10332	10756	10207
ATCGAAAGGATGGGAGTACTAAGCTGGGGATTGTTAATACTTAGCATCGATCCTCGACCCAGACGAGTCCGCCACCCCATATGACCGGCCGTCTCATTGGGGACTACCTCACACAAGCAGAAAAAGTCAGCACGGACAAAGTACTGAGAT	GGGGATTGTTAATACTTAGCATCGATCCTCGACCCAGACGAGTCCGCCACCCCATATGACCGGCCGTCTCATTGGGGACTACCTCACACAAGCAGAAAAA	cat2	universal neutral	N	0.993196	806	988	317	997	1270	1407	484	991	249	274	97	115	121	165
ATCGAAAGGATGGGAGTACTAAGCTTTAACGTCGTTATACGGTCCAGATCCACCATCATGTTATGAGTCCCTGATTACGTAGTCGTGGCCATTCCAACATCACAGGTAGACCGTCCTATAGCAGTGTCAGCACGGACAAAGTACTGAGAT	TTAACGTCGTTATACGGTCCAGATCCACCATCATGTTATGAGTCCCTGATTACGTAGTCGTGGCCATTCCAACATCACAGGTAGACCGTCCTATAGCAGT	cat2	universal neutral	N	0.993687	2106	1591	1765	1008	3415	3902	1137	2141	633	356	812	540	544	445
ATCGAAAGGATGGGAGTACTAAGCTGCCGTGACCGACAGCTACTCCATGGACGCCTTCTTCATCTCTGACGGGCGTTCGCGGCGGCGCCGGGCCGGGGCTGGCGGGGACGCGGCGGGCGCAGGGGGTCAGCACGGACAAAGTACTGAGAT	GCCGTGACCGACAGCTACTCCATGGACGCCTTCTTCATCTCTGACGGGCGTTCGCGGCGGCGCCGGGCCGGGGCTGGCGGGGACGCGGCGGGCGCAGGGG	cat2	universal neutral	N	0.997185	2309	2436	1553	3494	5074	5603	5390	5278	5894	4961	1995	2331	6828	8456
ATCGAAAGGATGGGAGTACTAAGCTAGAAGCTGGATCGCAGTTCTACGCCGAGCTTGCTCGTGATGGACGTCTTAAATTGACTTCCTCTGTGTGTCAAACTCACCGAGGACACGTGCATCTTATAGTCAGCACGGACAAAGTACTGAGAT	AGAAGCTGGATCGCAGTTCTACGCCGAGCTTGCTCGTGATGGACGTCTTAAATTGACTTCCTCTGTGTGTCAAACTCACCGAGGACACGTGCATCTTATA	cat2	universal neutral	N	0.997448	2343	1489	1455	933	2746	3582	2331	2993	1437	972	1836	1095	1038	1137
ATCGAAAGGATGGGAGTACTAAGCTATAAATGTATGCTTAGCTGTGGGGGGGCTGCATGCATTGTCATGTGGTGTGTTGTAGACTAACAGATTTACGCCACCCATTAGATCTAAATTAGCTGGAAGTCAGCACGGACAAAGTACTGAGAT	ATAAATGTATGCTTAGCTGTGGGGGGGCTGCATGCATTGTCATGTGGTGTGTTGTAGACTAACAGATTTACGCCACCCATTAGATCTAAATTAGCTGGAA	cat2	universal neutral	N	0.998066	244	170	15	614	424	549	297	611	247	379	47	678	120	165
ATCGAAAGGATGGGAGTACTAAGCTGGAACATAAAATACACAGGTTGGTTTATGCGAATGCCTTATGGTTTGTACCTTACCAGCCACCACTGGATAGTCTATTAACATCTAATTAATATAGATTAGTCAGCACGGACAAAGTACTGAGAT	GGAACATAAAATACACAGGTTGGTTTATGCGAATGCCTTATGGTTTGTACCTTACCAGCCACCACTGGATAGTCTATTAACATCTAATTAATATAGATTA	cat2	universal neutral	N	0.999246	401	80	453	479	103	238	118	198	303	458	1911	1364	60	152
ATCGAAAGGATGGGAGTACTAAGCTAGTTCGCTTCGTGGTCCAGGTGGGTACACCGAGCTGGCACTAGTTGTAAAACGTCGTGTTCTAAGTTCGGTTTGGGATACATAGAGACTACCTAGCTCGTGTCAGCACGGACAAAGTACTGAGAT	AGTTCGCTTCGTGGTCCAGGTGGGTACACCGAGCTGGCACTAGTTGTAAAACGTCGTGTTCTAAGTTCGGTTTGGGATACATAGAGACTACCTAGCTCGT	cat2	universal neutral	N	0.999269	1510	1418	1943	2183	3696	4038	2520	3471	1258	1080	3088	2819	1126	1153
ATCGAAAGGATGGGAGTACTAAGCTGCTGACTATGATAGCTTAGGGAGTTCAAAGACGATAAAATTCGTCGGTCCGTCCGAGCCCACCTGACCAGGGGCTGTTTTTATAGCTGCCCGTAACTGCTGTCAGCACGGACAAAGTACTGAGAT	GCTGACTATGATAGCTTAGGGAGTTCAAAGACGATAAAATTCGTCGGTCCGTCCGAGCCCACCTGACCAGGGGCTGTTTTTATAGCTGCCCGTAACTGCT	cat2	universal neutral	N	0.999314	1383	1462	1887	1553	2628	2898	1368	2559	1975	1547	3011	1869	2211	2501
ATCGAAAGGATGGGAGTACTAAGCTGTACCTCCACCGTGGATCGCTCAGATACAGGACAGCATCTAGCATGGACATCAGCATGTTCAGTTGCATAATTTTTTTTTACAAGCGTAGGTTCCCTTTTGTCAGCACGGACAAAGTACTGAGAT	GTACCTCCACCGTGGATCGCTCAGATACAGGACAGCATCTAGCATGGACATCAGCATGTTCAGTTGCATAATTTTTTTTTACAAGCGTAGGTTCCCTTTT	cat2	universal neutral	N	1.00082	2206	2100	2193	2918	2423	2404	1201	1270	1225	846	905	1371	1120	898
ATCGAAAGGATGGGAGTACTAAGCTAGGTGAGGAGCAGGGCCCGGTGCTCAAGCGCAGTGGCAGCCCCGGGCCACCAGGTCATCATAAGTCTGCAGTGACACACCACTGTCTGTCCTGTGCATAAGTCAGCACGGACAAAGTACTGAGAT	AGGTGAGGAGCAGGGCCCGGTGCTCAAGCGCAGTGGCAGCCCCGGGCCACCAGGTCATCATAAGTCTGCAGTGACACACCACTGTCTGTCCTGTGCATAA	cat2	universal neutral	N	1.00386	5134	4268	4178	5423	4389	4469	2745	2784	3618	3292	4853	3550	2444	2330
ATCGAAAGGATGGGAGTACTAAGCTAATGTCCAGCTTTGCTATATCGCTGGTTTGTTAGGCTGTAAATAGGAGAGTCCTTAATGAAGCCATGATGATATTACATGCTTGCCAAGTCACGCACCTTGTCAGCACGGACAAAGTACTGAGAT	AATGTCCAGCTTTGCTATATCGCTGGTTTGTTAGGCTGTAAATAGGAGAGTCCTTAATGAAGCCATGATGATATTACATGCTTGCCAAGTCACGCACCTT	cat2	universal neutral	N	1.00396	752	503	431	774	2893	3091	914	2015	845	548	1501	1615	737	1178
ATCGAAAGGATGGGAGTACTAAGCTAGAGTAGGCACACACAGAAGACCATCGTCGAAACCTTAGCTGTAGTAGCAGCAGCTGACTAAACGACAAGGTAGCCCATCTCGCCGGATTAATTGCTTATGTCAGCACGGACAAAGTACTGAGAT	AGAGTAGGCACACACAGAAGACCATCGTCGAAACCTTAGCTGTAGTAGCAGCAGCTGACTAAACGACAAGGTAGCCCATCTCGCCGGATTAATTGCTTAT	cat2	universal neutral	N	1.00468	3162	2252	1573	2026	1827	1996	982	1309	2775	2780	2209	2771	1304	1031
ATCGAAAGGATGGGAGTACTAAGCTATGCGATCGGCATCAAACGGTTAGGTCCACCGATGGACCAAGGTTTTTTGCTATCGGGGAATCGCAAGATTACCTCGAGACTTTTCGTATTGCCCTAACCGTCAGCACGGACAAAGTACTGAGAT	ATGCGATCGGCATCAAACGGTTAGGTCCACCGATGGACCAAGGTTTTTTGCTATCGGGGAATCGCAAGATTACCTCGAGACTTTTCGTATTGCCCTAACC	cat2	universal neutral	N	1.00838	2708	1990	2500	3614	4252	4362	2580	4693	821	1050	237	301	831	969
ATCGAAAGGATGGGAGTACTAAGCTTCCCCCCGTGCACGCATTAAATTAGAACTCGCAGGCACCCTCAAGAGTTTCAAACCTGCACAGGAGTAATGCTCGGTAACTTCGCTCTGAAGACACATGGGTCAGCACGGACAAAGTACTGAGAT	TCCCCCCGTGCACGCATTAAATTAGAACTCGCAGGCACCCTCAAGAGTTTCAAACCTGCACAGGAGTAATGCTCGGTAACTTCGCTCTGAAGACACATGG	cat2	universal neutral	N	1.00859	1473	1280	824	1054	979	1232	540	685	2062	1406	1230	994	1421	1265
ATCGAAAGGATGGGAGTACTAAGCTTACTTAATTGAACGTGGGAACGTGGTCAGTCGTAGCGGTTAGAGGGAAAGAGTTGGGGGGTCTTTTGGGACGTCCACGCTTCGAGGTCTTCTCACGGTAAGTCAGCACGGACAAAGTACTGAGAT	TACTTAATTGAACGTGGGAACGTGGTCAGTCGTAGCGGTTAGAGGGAAAGAGTTGGGGGGTCTTTTGGGACGTCCACGCTTCGAGGTCTTCTCACGGTAA	cat2	universal neutral	N	1.00868	773	483	261	694	1631	1696	637	586	696	582	917	787	433	480
ATCGAAAGGATGGGAGTACTAAGCTACGGGAGCGTGCCCCATGACAAGAAGGGAATATCAACATTCCATACTGTTGGTTCTTTTTTATTGGAGCCATGCTTCTAATTATGTACGAAGTGGCAGAAGTCAGCACGGACAAAGTACTGAGAT	ACGGGAGCGTGCCCCATGACAAGAAGGGAATATCAACATTCCATACTGTTGGTTCTTTTTTATTGGAGCCATGCTTCTAATTATGTACGAAGTGGCAGAA	cat2	universal neutral	N	1.01057	931	694	531	456	2366	2366	1012	1648	818	1006	762	424	1413	1313
ATCGAAAGGATGGGAGTACTAAGCTAGCCCGCGCTCCCGCGGCCGAGCCCGGCAGGAAGCGCCCGCCCGAGCCGCCAGCGCCGCAGCCCGCGCCGCCTCCCGCGCTCACCTGCCCCGCGCGCCGCGTCAGCACGGACAAAGTACTGAGAT	AGCCCGCGCTCCCGCGGCCGAGCCCGGCAGGAAGCGCCCGCCCGAGCCGCCAGCGCCGCAGCCCGCGCCGCCTCCCGCGCTCACCTGCCCCGCGCGCCGC	cat2	universal neutral	N	1.01195	3317	7388	4242	3667	6256	7217	6141	4700	4857	14213	11705	13592	15934	18720
ATCGAAAGGATGGGAGTACTAAGCTGGTTCACCCACCGACACGACAATGAACAATCCTAGAACCTCGATGTGTTTTCACATCCCGTGTTGACGGTGCCGTTGATGTACTTGTAGCGCTCATTGCGGTCAGCACGGACAAAGTACTGAGAT	GGTTCACCCACCGACACGACAATGAACAATCCTAGAACCTCGATGTGTTTTCACATCCCGTGTTGACGGTGCCGTTGATGTACTTGTAGCGCTCATTGCG	cat2	universal neutral	N	1.012	4434	3403	3231	4997	4936	5267	2806	2810	3409	2463	3743	4588	1882	1934
ATCGAAAGGATGGGAGTACTAAGCTCTAGCATAAGCGATGCTCGTGTATATTGATTGATACCGAAAAGTTTGGGTAATTACGCATAGGAATGGTGTAGGCCTATCATTATCCATGGAAATAACTTGTCAGCACGGACAAAGTACTGAGAT	CTAGCATAAGCGATGCTCGTGTATATTGATTGATACCGAAAAGTTTGGGTAATTACGCATAGGAATGGTGTAGGCCTATCATTATCCATGGAAATAACTT	cat2	universal neutral	N	1.01281	633	482	253	206	909	1046	421	635	579	692	496	234	293	318
ATCGAAAGGATGGGAGTACTAAGCTCAACTATCCGTATAGGTGAAGGCGATGAAGCCTTGGTCCCAGAGGAACTAGGGCAGTCCAATGGTTTAATCATGACCCCAGATTAGCCCCCCGTCTCCCAGTCAGCACGGACAAAGTACTGAGAT	CAACTATCCGTATAGGTGAAGGCGATGAAGCCTTGGTCCCAGAGGAACTAGGGCAGTCCAATGGTTTAATCATGACCCCAGATTAGCCCCCCGTCTCCCA	cat2	universal neutral	N	1.01322	907	745	598	593	2225	2551	1296	1670	770	620	530	678	938	947
ATCGAAAGGATGGGAGTACTAAGCTTAAAAGGTTTCCGAAGCACACGGGACGGGGAATATTTCTACGTGTGGGATCTCAGCCCATTCTGGATCTCAGAATGGACCGCATGGATAATCAGCTAAGTGTCAGCACGGACAAAGTACTGAGAT	TAAAAGGTTTCCGAAGCACACGGGACGGGGAATATTTCTACGTGTGGGATCTCAGCCCATTCTGGATCTCAGAATGGACCGCATGGATAATCAGCTAAGT	cat2	universal neutral	N	1.01373	423	147	229	573	1462	1824	405	897	55	51	63	80	38	28
ATCGAAAGGATGGGAGTACTAAGCTTCTGCAGAAATTCGTTACGTCTGCCGGGGGGCGAAAACAGACGGCGAATACCTTAACACTGGGACAGGTTTGTGTGTGATTATGCATTCTTAAGGTGTATGTCAGCACGGACAAAGTACTGAGAT	TCTGCAGAAATTCGTTACGTCTGCCGGGGGGCGAAAACAGACGGCGAATACCTTAACACTGGGACAGGTTTGTGTGTGATTATGCATTCTTAAGGTGTAT	cat2	universal neutral	N	1.01397	797	665	691	801	1366	1598	819	953	1129	1126	1006	909	1158	1283
ATCGAAAGGATGGGAGTACTAAGCTGCATCCTCCTCTGTACCGAATACCGTGCATGAGGCGAATTTGCGTTGTTTCAGACGTATATCTTGTAGGCGCGCCGAGGGGCCCTTGGTTAGGGCATCATGTCAGCACGGACAAAGTACTGAGAT	GCATCCTCCTCTGTACCGAATACCGTGCATGAGGCGAATTTGCGTTGTTTCAGACGTATATCTTGTAGGCGCGCCGAGGGGCCCTTGGTTAGGGCATCAT	cat2	universal neutral	N	1.01398	1917	1544	1447	1985	4371	5004	4160	5364	1855	1838	1584	2705	4456	4508
ATCGAAAGGATGGGAGTACTAAGCTAAAATGGGGTTTGAGTACTACCTGATGACACGCTGCCGTTCTACGTACGTGAAGCCCTCCGTGGAACCTTGCTTGCAAAGCGGGCACTTAATTACTTAAAGTCAGCACGGACAAAGTACTGAGAT	AAAATGGGGTTTGAGTACTACCTGATGACACGCTGCCGTTCTACGTACGTGAAGCCCTCCGTGGAACCTTGCTTGCAAAGCGGGCACTTAATTACTTAAA	cat2	universal neutral	N	1.01556	589	457	345	427	1259	1172	288	560	501	437	459	731	372	431
ATCGAAAGGATGGGAGTACTAAGCTAGGGACAATGCCGATTTAGTGGTCGAGAGGCTTCGTCAGTAGTTAATGATCCTCCGTAGCACCAACGAGGTCTTCTTGATACCTCGGTCCGGGCGAAATAGTCAGCACGGACAAAGTACTGAGAT	AGGGACAATGCCGATTTAGTGGTCGAGAGGCTTCGTCAGTAGTTAATGATCCTCCGTAGCACCAACGAGGTCTTCTTGATACCTCGGTCCGGGCGAAATA	cat2	universal neutral	N	1.01584	960	638	401	590	3431	4091	1853	2829	414	229	4	143	435	317
ATCGAAAGGATGGGAGTACTAAGCTGCATAGTCGAACTCGACATTAAAACAGTGTCGAGAAGGCAGGGCCAAGATCCGTCAACGTACGAAAGAATCTGAAAACGTACTCAGGCAGCTACGTGCCAGTCAGCACGGACAAAGTACTGAGAT	GCATAGTCGAACTCGACATTAAAACAGTGTCGAGAAGGCAGGGCCAAGATCCGTCAACGTACGAAAGAATCTGAAAACGTACTCAGGCAGCTACGTGCCA	cat2	universal neutral	N	1.01594	1238	1022	675	1240	2006	2078	1033	721	484	471	389	373	248	345
ATCGAAAGGATGGGAGTACTAAGCTAGCAGCGTGACGGTGTTCCTGCAGTTGTGCAGCCGCGTGGTGAAGCTGGACGTGGTGGGCGAGTTGTAGTCCTCGGTGGTCTCGGCGATGAACTCGGACAGTCAGCACGGACAAAGTACTGAGAT	AGCAGCGTGACGGTGTTCCTGCAGTTGTGCAGCCGCGTGGTGAAGCTGGACGTGGTGGGCGAGTTGTAGTCCTCGGTGGTCTCGGCGATGAACTCGGACA	cat2	universal neutral	N	1.01617	1791	1915	554	1493	2706	3270	1129	2148	2307	2782	1012	2076	1890	1844
ATCGAAAGGATGGGAGTACTAAGCTGCCCCGCGGGCGGGTCCCTCCGGACCGAAGCGGGCGGCCCGGGGTGCGCTAACGAGCAGGGGCCCCAGGTGCGGGCCCCACCCCGGGCTGGGGGGCCGGGGTCAGCACGGACAAAGTACTGAGAT	GCCCCGCGGGCGGGTCCCTCCGGACCGAAGCGGGCGGCCCGGGGTGCGCTAACGAGCAGGGGCCCCAGGTGCGGGCCCCACCCCGGGCTGGGGGGCCGGG	cat2	universal neutral	N	1.01654	2986	4265	3922	6448	4707	4660	3970	5092	8080	6938	6035	6882	8355	8027
ATCGAAAGGATGGGAGTACTAAGCTTGGATATGGGCCTACAGGGCGATCCCCAAGAGGACGCACTTTGTGTGATGCCTAGTAGAAGCTCTGTAACTTCCACGTTCTACTTCTACGTATAAAATTGGTCAGCACGGACAAAGTACTGAGAT	TGGATATGGGCCTACAGGGCGATCCCCAAGAGGACGCACTTTGTGTGATGCCTAGTAGAAGCTCTGTAACTTCCACGTTCTACTTCTACGTATAAAATTG	cat2	universal neutral	N	1.01682	751	567	51	163	1799	2005	1159	1145	179	86	2	137	282	461
ATCGAAAGGATGGGAGTACTAAGCTTAGATTCCATCATTACTGTATCCGGTACCATGGAGTTTTGCGTGCTTCACAGACAAATGTTGCCCAAATAGTAGAGAGCTACGAAACCCCAACATTTTGTGTCAGCACGGACAAAGTACTGAGAT	TAGATTCCATCATTACTGTATCCGGTACCATGGAGTTTTGCGTGCTTCACAGACAAATGTTGCCCAAATAGTAGAGAGCTACGAAACCCCAACATTTTGT	cat2	universal neutral	N	1.01723	963	690	531	1082	2855	2911	1876	1415	791	719	807	877	965	892
ATCGAAAGGATGGGAGTACTAAGCTGCGTCACATAAATGAAGTTCATGTTCTGAGCTTACATGGGGCGTACGCGCCCGAGTCGCATGTCTGGCTAAACCCTCCGAGTTGGGTCCCTAGTATAGTGGTCAGCACGGACAAAGTACTGAGAT	GCGTCACATAAATGAAGTTCATGTTCTGAGCTTACATGGGGCGTACGCGCCCGAGTCGCATGTCTGGCTAAACCCTCCGAGTTGGGTCCCTAGTATAGTG	cat2	universal neutral	N	1.01761	1980	2051	1387	1286	2807	3327	1245	1616	1670	1843	3215	988	1534	1589
ATCGAAAGGATGGGAGTACTAAGCTAATTGCTGTTATCTGTCCAAAACACTACAAGAGAGGGGCATAGCTAGCCAAAGCGTAGCTTGGTAATCGGCATCTGAGTCAATAAGCAGTATGCTTCCATGTCAGCACGGACAAAGTACTGAGAT	AATTGCTGTTATCTGTCCAAAACACTACAAGAGAGGGGCATAGCTAGCCAAAGCGTAGCTTGGTAATCGGCATCTGAGTCAATAAGCAGTATGCTTCCAT	cat2	universal neutral	N	1.01901	2108	1398	882	1354	2060	2798	1165	1214	1063	921	1533	1810	691	1137
ATCGAAAGGATGGGAGTACTAAGCTTTAGGCCGCCGCCTCGTATGTTGTCCTTGATGAAGTAACCTCCCACGAAACAAGCCAAAATCGTACTGAATAACCGATCTGTCATACAGCCCATATAGTAGTCAGCACGGACAAAGTACTGAGAT	TTAGGCCGCCGCCTCGTATGTTGTCCTTGATGAAGTAACCTCCCACGAAACAAGCCAAAATCGTACTGAATAACCGATCTGTCATACAGCCCATATAGTA	cat2	universal neutral	N	1.01909	806	316	598	1371	1631	1684	804	1525	75	12	3	1	122	56
ATCGAAAGGATGGGAGTACTAAGCTTGTGCTCCGGGGCCCGAACTTGGGTTCTCATGAGGTTTTTAAAATTTTACTTTAAAATTTACGTTTATAGTCCGTGAGCATGCGCATGAATCTATGCTTGGTCAGCACGGACAAAGTACTGAGAT	TGTGCTCCGGGGCCCGAACTTGGGTTCTCATGAGGTTTTTAAAATTTTACTTTAAAATTTACGTTTATAGTCCGTGAGCATGCGCATGAATCTATGCTTG	cat2	universal neutral	N	1.02154	697	78	151	291	416	1216	1030	965	511	324	548	810	1063	1124
ATCGAAAGGATGGGAGTACTAAGCTTTCCCCGACTGTAGCACCGCGCTGCTGGGCCTTGACTGTGGAAGAAAAACAGTCCTTCTAGGTTTCTCGGTCAATCCATTGTCCCAGTGGGGTCGAACAAGTCAGCACGGACAAAGTACTGAGAT	TTCCCCGACTGTAGCACCGCGCTGCTGGGCCTTGACTGTGGAAGAAAAACAGTCCTTCTAGGTTTCTCGGTCAATCCATTGTCCCAGTGGGGTCGAACAA	cat2	universal neutral	N	1.0223	2908	2630	2019	2275	3036	3524	3815	5296	3497	2673	3404	2770	2880	3310
ATCGAAAGGATGGGAGTACTAAGCTACCCAGACAAGTACCTTACCAAAGCGACAGCTTTCAAAAGTTTACGAGTTCGTGCCTCCATAAGGACTAATTATGGGGTAGCCCTGTGTGATGCCTAGTCGTCAGCACGGACAAAGTACTGAGAT	ACCCAGACAAGTACCTTACCAAAGCGACAGCTTTCAAAAGTTTACGAGTTCGTGCCTCCATAAGGACTAATTATGGGGTAGCCCTGTGTGATGCCTAGTC	cat2	universal neutral	N	1.0224	1393	760	652	770	2819	2792	1067	1800	1173	841	1104	1056	1706	1709
ATCGAAAGGATGGGAGTACTAAGCTCTCCGTTCCCCTTTACGGATGCCACCCCTTAATGGGCAGAAGGAGGTCTAGTGACCACGCTCCCCTTGCGCGTGCAAGCCACTTTCGGTGCCACTTCGAGGTCAGCACGGACAAAGTACTGAGAT	CTCCGTTCCCCTTTACGGATGCCACCCCTTAATGGGCAGAAGGAGGTCTAGTGACCACGCTCCCCTTGCGCGTGCAAGCCACTTTCGGTGCCACTTCGAG	cat2	universal neutral	N	1.0228	5257	4161	3588	6795	6863	7489	3916	4876	3305	2865	4080	6226	2759	3081
ATCGAAAGGATGGGAGTACTAAGCTCCAGAGCGAGGTATTTTTTGGCCCCATGGACACTCGGGTCTCAATCAAGACAGGGCTCCTAGTCGGGTCTGCAAATCCCCAAATCGTGCCAATCGCCACAGTCAGCACGGACAAAGTACTGAGAT	CCAGAGCGAGGTATTTTTTGGCCCCATGGACACTCGGGTCTCAATCAAGACAGGGCTCCTAGTCGGGTCTGCAAATCCCCAAATCGTGCCAATCGCCACA	cat2	universal neutral	N	1.02358	1784	1473	1986	2043	2000	2113	890	855	1011	864	1470	2574	1148	1149
ATCGAAAGGATGGGAGTACTAAGCTGGGGAGAGCATCGTGCCCAATCTTCCTAGGGCTGCCTCCCGAAGAGTGGCAGAGGCTAAATAAGGGCCTCGCAGTTGACGAGTCGTCTTGGTTATCGACCGTCAGCACGGACAAAGTACTGAGAT	GGGGAGAGCATCGTGCCCAATCTTCCTAGGGCTGCCTCCCGAAGAGTGGCAGAGGCTAAATAAGGGCCTCGCAGTTGACGAGTCGTCTTGGTTATCGACC	cat2	universal neutral	N	1.02364	1442	958	1038	1582	2987	3138	1503	1465	1395	1224	1029	1250	1206	1046
ATCGAAAGGATGGGAGTACTAAGCTTGTGAGAACCCCCCGTAGCCGGAGAAGGATCTCCTAAAGTGGTAACGTTGGTATAGCCAGACCCTAGATACAGTTGGAGAGTTGTACTAGGTGCATACTCGTCAGCACGGACAAAGTACTGAGAT	TGTGAGAACCCCCCGTAGCCGGAGAAGGATCTCCTAAAGTGGTAACGTTGGTATAGCCAGACCCTAGATACAGTTGGAGAGTTGTACTAGGTGCATACTC	cat2	universal neutral	N	1.02446	1397	1295	1233	3143	2665	3092	2308	2771	374	316	314	270	238	294
ATCGAAAGGATGGGAGTACTAAGCTGGAAGGAAAGGAAGGAAGGAAGGAAGGAAGGAAGGAAGGAAGGAAGAAGGGAGGAAGAAAGAAAAACATCCCCCCACACGCTCATGTTTATAAAAAGACTGTCAGCACGGACAAAGTACTGAGAT	GGAAGGAAAGGAAGGAAGGAAGGAAGGAAGGAAGGAAGGAAGGAAGAAGGGAGGAAGAAAGAAAAACATCCCCCCACACGCTCATGTTTATAAAAAGACT	cat2	universal neutral	N	1.02607	159	111	67	311	192	203	105	180	138	123	224	261	33	36
ATCGAAAGGATGGGAGTACTAAGCTGGCATTATTGAAGCAGGTTCGATTCAAAACTGATAATCGCAGTCCTCGGGTCCCAGGGTCTGACCGTTGGCTTACGAGTACATCACCGTTAGACTCATGGGTCAGCACGGACAAAGTACTGAGAT	GGCATTATTGAAGCAGGTTCGATTCAAAACTGATAATCGCAGTCCTCGGGTCCCAGGGTCTGACCGTTGGCTTACGAGTACATCACCGTTAGACTCATGG	cat2	universal neutral	N	1.02645	3749	2851	3221	3807	4259	5321	2245	3095	1977	2051	4005	4087	1061	1064
ATCGAAAGGATGGGAGTACTAAGCTAGGAGATGACATCCCATATCGGTAAATAAAACTTAGGTCTTCCATATGTCCAAAGGTGTCGGCGAGGCCGGTGCGATAAGGTTGCCAAATCCTCAGCTGGGTCAGCACGGACAAAGTACTGAGAT	AGGAGATGACATCCCATATCGGTAAATAAAACTTAGGTCTTCCATATGTCCAAAGGTGTCGGCGAGGCCGGTGCGATAAGGTTGCCAAATCCTCAGCTGG	cat2	universal neutral	N	1.02707	1497	982	730	1772	2525	2672	1633	1649	1705	1440	1020	1822	606	746
ATCGAAAGGATGGGAGTACTAAGCTTCCACCGTGGGCCCTTGCGTTAGTGATGGGCCAACCAATGTGACGGGGTGGACAGCAAGCCGCTCGATCATCTCTATTCGGCACAGCATGTGTTGCTTGCGTCAGCACGGACAAAGTACTGAGAT	TCCACCGTGGGCCCTTGCGTTAGTGATGGGCCAACCAATGTGACGGGGTGGACAGCAAGCCGCTCGATCATCTCTATTCGGCACAGCATGTGTTGCTTGC	cat2	universal neutral	N	1.02769	2283	2225	2136	3900	4841	5298	3322	4672	478	225	133	32	350	271
ATCGAAAGGATGGGAGTACTAAGCTGTGCGAGACATGTAGTGCCTAAATGTCCGCACCGTCAGGAATGATACCATCGATGGAAGCCTGGGCAATTAGATGAGGTGTGTCGTATCCGTGTCCCGGAGTCAGCACGGACAAAGTACTGAGAT	GTGCGAGACATGTAGTGCCTAAATGTCCGCACCGTCAGGAATGATACCATCGATGGAAGCCTGGGCAATTAGATGAGGTGTGTCGTATCCGTGTCCCGGA	cat2	universal neutral	N	1.02799	4303	3202	2682	2804	5576	6861	3037	3765	4132	3168	3277	4330	2585	2984
ATCGAAAGGATGGGAGTACTAAGCTCTAAGGTTTTGTAGTCATGCCCATAATGCGCTGGCAGTTCGAGGCTCCTAATCATAAGAAAGACTATACTCTGTGATGTCCAACTACGGTGGCTGACTATGTCAGCACGGACAAAGTACTGAGAT	CTAAGGTTTTGTAGTCATGCCCATAATGCGCTGGCAGTTCGAGGCTCCTAATCATAAGAAAGACTATACTCTGTGATGTCCAACTACGGTGGCTGACTAT	cat2	universal neutral	N	1.02803	1245	1334	1469	3354	2074	2102	2905	3661	1367	1576	2109	4513	483	553
ATCGAAAGGATGGGAGTACTAAGCTGAATTGATGTAGAACGGCCGGGTACCCAGCTCCAGAGTTGCCCACCTAGGGCCGCTGCGTGTAATTTACAATCATTGTTCTTCCCGTGCCGGGCCGATAGGTCAGCACGGACAAAGTACTGAGAT	GAATTGATGTAGAACGGCCGGGTACCCAGCTCCAGAGTTGCCCACCTAGGGCCGCTGCGTGTAATTTACAATCATTGTTCTTCCCGTGCCGGGCCGATAG	cat2	universal neutral	N	1.02814	1161	1138	1519	2673	2528	2923	1697	2303	1412	1369	1971	2053	952	1016
ATCGAAAGGATGGGAGTACTAAGCTGTACTCGTCCTTTCTGATGGTTCCAATTTAGTTCTCGGGGCCCTAAAGAGGGTCCAGCGAGCGAAACTTTAAACAGATTACCCGCACGAGTAATAAACACGTCAGCACGGACAAAGTACTGAGAT	GTACTCGTCCTTTCTGATGGTTCCAATTTAGTTCTCGGGGCCCTAAAGAGGGTCCAGCGAGCGAAACTTTAAACAGATTACCCGCACGAGTAATAAACAC	cat2	universal neutral	N	1.02856	271	266	78	463	1235	1172	245	405	944	660	32	578	586	824
ATCGAAAGGATGGGAGTACTAAGCTAAATGATCTCCCACTAACCCTCCTCACGATCTTCCTCGACAGAAAACATCCCATATTACAGATGAGCTGTTTCCTTCATGGAATCGACTGCCTCCGTGGTGTCAGCACGGACAAAGTACTGAGAT	AAATGATCTCCCACTAACCCTCCTCACGATCTTCCTCGACAGAAAACATCCCATATTACAGATGAGCTGTTTCCTTCATGGAATCGACTGCCTCCGTGGT	cat2	universal neutral	N	1.03059	1040	778	725	1371	4476	4679	3498	4795	421	426	4	108	409	303
ATCGAAAGGATGGGAGTACTAAGCTATTGAACATTCTGAGTACACCCTTTCTAGTCCTGAAGTCAAAATGTCACCAGCCTTAAAGCTTTTCTGAAACCATTGGCCGATGTCTAAGTCTCACTCTGGTCAGCACGGACAAAGTACTGAGAT	ATTGAACATTCTGAGTACACCCTTTCTAGTCCTGAAGTCAAAATGTCACCAGCCTTAAAGCTTTTCTGAAACCATTGGCCGATGTCTAAGTCTCACTCTG	cat2	universal neutral	N	1.03093	3107	2341	2613	4460	3636	3590	1491	2498	3410	2716	5578	8418	1312	1536
ATCGAAAGGATGGGAGTACTAAGCTTGTTTACAGCAAATATGCAAATAAGTTTACAGCAAATACGCAAATATGTTTACGGCAAATAGGCAAATACGTTTACCGCAAATATGCAAATAGACGTTTAGTCAGCACGGACAAAGTACTGAGAT	TGTTTACAGCAAATATGCAAATAAGTTTACAGCAAATACGCAAATATGTTTACGGCAAATAGGCAAATACGTTTACCGCAAATATGCAAATAGACGTTTA	cat3		N	GTTTAC,GCAAATA,GCAAATA-4-1	748	588	554	1112	744	751	241	638	911	657	832	1057	262	412
ATCGAAAGGATGGGAGTACTAAGCTTCTCAGCACCATTTGTGTATCTTATCTAGGAAAATGGTCACTGAATTTATCTAGGTAGCCTGACTTTGTCCTTTATCAGTGTCTTTCCCCAAGACGTTTAGTCAGCACGGACAAAGTACTGAGAT	TCTCAGCACCATTTGTGTATCTTATCTAGGAAAATGGTCACTGAATTTATCTAGGTAGCCTGACTTTGTCCTTTATCAGTGTCTTTCCCCAAGACGTTTA	cat3		N	CTTATC,TTATCT,TTATC-1-20	2509	2250	1423	2465	3980	4143	2324	3148	2747	2391	2373	3739	2417	2536
ATCGAAAGGATGGGAGTACTAAGCTTCTTATCATTATCTGTATTTACGCTTATCGTTATCTGTATTTACACTTATCCTTATCTCTATTTACTCTTATCCTTATCTGTATTTACCCAAGACGTTTAGTCAGCACGGACAAAGTACTGAGAT	TCTTATCATTATCTGTATTTACGCTTATCGTTATCTGTATTTACACTTATCCTTATCTCTATTTACTCTTATCCTTATCTGTATTTACCCAAGACGTTTA	cat3		N	CTTATC,TTATCT,TATTTAC-4-1	2923	307	1248	1691	1631	2723	1394	1959	3018	2576	8061	9078	932	1153
ATCGAAAGGATGGGAGTACTAAGCTTCTCAGCACGATAAGTGTATGGGACTTATCAAAATGGTCCTTATCTTTGAGCAGGATAAGTGACTTTGTCTTATCACAGTGTCTCTTATCAAGACGTTTAGTCAGCACGGACAAAGTACTGAGAT	TCTCAGCACGATAAGTGTATGGGACTTATCAAAATGGTCCTTATCTTTGAGCAGGATAAGTGACTTTGTCTTATCACAGTGTCTCTTATCAAGACGTTTA	cat3		N	GATAAG,CTTATC,CTTATC-2-9	1771	1563	1262	2672	3968	4678	2314	3087	1332	921	1350	3882	2636	2768
ATCGAAAGGATGGGAGTACTAAGCTTCTCAGCAGATAAGGTGTATGGTGTTTGCGAAAATGGTGTTTGCATTTGAGCGATAAGCCTGACTTTGTTTGCCAACAGTGTGTTTGCCCAAGACGTTTAGTCAGCACGGACAAAGTACTGAGAT	TCTCAGCAGATAAGGTGTATGGTGTTTGCGAAAATGGTGTTTGCATTTGAGCGATAAGCCTGACTTTGTTTGCCAACAGTGTGTTTGCCCAAGACGTTTA	cat3		N	GATAAG,TGTTTGC,TGTTTGC-2-8	2371	1731	1564	1508	3475	3920	1869	3036	2171	2431	3074	3159	1883	2029
ATCGAAAGGATGGGAGTACTAAGCTTCTCAGCACCATTTGTGTATGCAAACAAGGAAAATGGTCACTGAATTTTATCAGGTAGCCTGACTTTGTCCTTTATCAGTGTCTTTCCCCAAGACGTTTAGTCAGCACGGACAAAGTACTGAGAT	TCTCAGCACCATTTGTGTATGCAAACAAGGAAAATGGTCACTGAATTTTATCAGGTAGCCTGACTTTGTCCTTTATCAGTGTCTTTCCCCAAGACGTTTA	cat3		N	GCAAACA,TTATC,TTATC-1-20	4370	2750	2311	3218	3832	4396	2739	3836	4056	3859	5154	4837	2778	3217
ATCGAAAGGATGGGAGTACTAAGCTTCTCAGCACCTTATCTGTATGGGAAGATAAAAAATGGTCTTATCTTTTGAGCAGCTTATCTGACTTTGTAGATAAACAGTGTCTTTATCTAAGACGTTTAGTCAGCACGGACAAAGTACTGAGAT	TCTCAGCACCTTATCTGTATGGGAAGATAAAAAATGGTCTTATCTTTTGAGCAGCTTATCTGACTTTGTAGATAAACAGTGTCTTTATCTAAGACGTTTA	cat3		N	CTTATC,AGATAA,TTATCT-2-9	1605	867	1108	1679	1582	2060	1222	1078	1423	1239	1732	3080	1466	1493
ATCGAAAGGATGGGAGTACTAAGCTTCTCAGCACCATTTGTGTATTATTTACAGGAAAATGGTCACTGAATTGTTTACGGTAGCCTGACTTTGTCCTTGTTTACTGTCTTTCCCCAAGACGTTTAGTCAGCACGGACAAAGTACTGAGAT	TCTCAGCACCATTTGTGTATTATTTACAGGAAAATGGTCACTGAATTGTTTACGGTAGCCTGACTTTGTCCTTGTTTACTGTCTTTCCCCAAGACGTTTA	cat3		N	TATTTAC,GTTTAC,GTTTAC-1-20	1489	880	960	982	2773	3328	3615	3062	1423	1154	1287	1694	2231	2472
ATCGAAAGGATGGGAGTACTAAGCTTCTCAGCACCATTTGTGTAGCAAATATAGGAAAATGGTCACTGAAGCAAATAAGGTAGCCTGACTTTGTCCGCAAATAGTGTCTTTCCCCAAGACGTTTAGTCAGCACGGACAAAGTACTGAGAT	TCTCAGCACCATTTGTGTAGCAAATATAGGAAAATGGTCACTGAAGCAAATAAGGTAGCCTGACTTTGTCCGCAAATAGTGTCTTTCCCCAAGACGTTTA	cat3		N	GCAAATA,GCAAATA,GCAAATA-1-19	1247	990	763	925	2891	3175	1657	2117	1371	1054	1453	721	1472	1606
ATCGAAAGGATGGGAGTACTAAGCTTCTCAGCACCATTTGTGTATTTATCATAGGAAAATGGTCACTGAATTATCGCAGGTAGCCTGACTTTGTCGCAAATAAGTGTCTTTCCCCAAGACGTTTAGTCAGCACGGACAAAGTACTGAGAT	TCTCAGCACCATTTGTGTATTTATCATAGGAAAATGGTCACTGAATTATCGCAGGTAGCCTGACTTTGTCGCAAATAAGTGTCTTTCCCCAAGACGTTTA	cat3		N	TTATC,TTATC,GCAAATA-1-20	1402	855	835	591	2476	2901	1395	2141	1382	1370	1139	1112	1106	1170
ATCGAAAGGATGGGAGTACTAAGCTTTATTTACCGTTTACTGCAAATAATATTTACAGTTTACCGCAAATATTATTTACGGTTTACGGCAAATACTATTTACAGTTTACTGCAAATAGACGTTTAGTCAGCACGGACAAAGTACTGAGAT	TTATTTACCGTTTACTGCAAATAATATTTACAGTTTACCGCAAATATTATTTACGGTTTACGGCAAATACTATTTACAGTTTACTGCAAATAGACGTTTA	cat3		N	TATTTAC,GTTTAC,GCAAATA-4-1	116	66	55	41	531	751	320	260	79	88	268	71	314	254
ATCGAAAGGATGGGAGTACTAAGCTTCTCAGCATTATCTGTGTATGGTGTTTGCGAAAATGGGCAAACAATTTGAGCTTATCTCCTGACTTTGTTTGCCAACAGTGGCAAACACCAAGACGTTTAGTCAGCACGGACAAAGTACTGAGAT	TCTCAGCATTATCTGTGTATGGTGTTTGCGAAAATGGGCAAACAATTTGAGCTTATCTCCTGACTTTGTTTGCCAACAGTGGCAAACACCAAGACGTTTA	cat3		N	TTATCT,TGTTTGC,GCAAACA-2-8	3135	2589	1300	1995	2518	2390	785	1330	1565	1593	1664	2117	1372	1433
ATCGAAAGGATGGGAGTACTAAGCTTCTCAGCAGCAAACATGTATGGGGCAAATAAAAATGGTGCAAATATTTGAGCAGCAAACATGACTTTGGCAAATAACAGTGTCGCAAATAAAGACGTTTAGTCAGCACGGACAAAGTACTGAGAT	TCTCAGCAGCAAACATGTATGGGGCAAATAAAAATGGTGCAAATATTTGAGCAGCAAACATGACTTTGGCAAATAACAGTGTCGCAAATAAAGACGTTTA	cat3		N	GCAAACA,GCAAATA,GCAAATA-2-8	870	1117	19	431	1040	1194	344	418	1030	1024	212	626	425	410
ATCGAAAGGATGGGAGTACTAAGCTTCTCAGCAGCAAACATGTATGGGTATTTACAAAATGGTTTATCAATTTGAGGCAAACACCTGACTTTATTTACCAACAGTGTTATCCCCCAAGACGTTTAGTCAGCACGGACAAAGTACTGAGAT	TCTCAGCAGCAAACATGTATGGGTATTTACAAAATGGTTTATCAATTTGAGGCAAACACCTGACTTTATTTACCAACAGTGTTATCCCCCAAGACGTTTA	cat3		N	GCAAACA,TATTTAC,TTATC-2-8	1631	1467	1075	784	2255	1923	831	744	1513	1552	1881	1483	1257	1406
ATCGAAAGGATGGGAGTACTAAGCTTCTCAGCAAGATAAGTGTATGGTATTTACGAAAATGGGTTTACAATTTGAGAGATAAGCCTGACTTATTTACTCAACAGTGTTTACCCCCAAGACGTTTAGTCAGCACGGACAAAGTACTGAGAT	TCTCAGCAAGATAAGTGTATGGTATTTACGAAAATGGGTTTACAATTTGAGAGATAAGCCTGACTTATTTACTCAACAGTGTTTACCCCCAAGACGTTTA	cat3		N	AGATAA,TATTTAC,GTTTAC-2-8	1468	1103	887	1095	2750	3223	2008	2688	2080	1639	1559	1356	1622	1557
ATCGAAAGGATGGGAGTACTAAGCTTCTCAGCACCATTTGTGTATGTTTACTAGGAAAATGGTCACTGAATGCAAATAGGTAGCCTGACTTTGTCCTTGCAAATAGTCTTTCCCCAAGACGTTTAGTCAGCACGGACAAAGTACTGAGAT	TCTCAGCACCATTTGTGTATGTTTACTAGGAAAATGGTCACTGAATGCAAATAGGTAGCCTGACTTTGTCCTTGCAAATAGTCTTTCCCCAAGACGTTTA	cat3		N	GTTTAC,GCAAATA,GCAAATA-1-20	1715	1228	1092	1609	1650	1587	1158	858	2091	1283	1554	1961	1154	1507
ATCGAAAGGATGGGAGTACTAAGCTTCTCAGCACCATTTGTGTATAGATAATAGGAAAATGGTCACTGAATTGTTTGCGGTAGCCTGACTTTGTCCTTGCAAATAGTCTTTCCCCAAGACGTTTAGTCAGCACGGACAAAGTACTGAGAT	TCTCAGCACCATTTGTGTATAGATAATAGGAAAATGGTCACTGAATTGTTTGCGGTAGCCTGACTTTGTCCTTGCAAATAGTCTTTCCCCAAGACGTTTA	cat3		N	AGATAA,TGTTTGC,GCAAATA-1-20	435	416	171	395	2023	2265	1393	1316	602	667	90	806	1148	1469
ATCGAAAGGATGGGAGTACTAAGCTTCTCAGCACGATAAGTGTATGGGAGATAAGAAAATGGTCTTATCATTTGAGCAGATAAGCTGACTTTGGATAAGAACAGTGTCTTATCCCAAGACGTTTAGTCAGCACGGACAAAGTACTGAGAT	TCTCAGCACGATAAGTGTATGGGAGATAAGAAAATGGTCTTATCATTTGAGCAGATAAGCTGACTTTGGATAAGAACAGTGTCTTATCCCAAGACGTTTA	cat3		N	GATAAG,GATAAG,TTATC-2-9	5523	3529	4764	6664	2354	2360	2529	2464	3981	3440	8231	9940	1819	1987
ATCGAAAGGATGGGAGTACTAAGCTTCTCAGCACCATTTGTGTATCTTATCTAGGAAAATGGTCACTGAATTATTTACGGTAGCCTGACTTTGTCCTTGCAAATAGTCTTTCCCCAAGACGTTTAGTCAGCACGGACAAAGTACTGAGAT	TCTCAGCACCATTTGTGTATCTTATCTAGGAAAATGGTCACTGAATTATTTACGGTAGCCTGACTTTGTCCTTGCAAATAGTCTTTCCCCAAGACGTTTA	cat3		N	CTTATC,TATTTAC,GCAAATA-1-20	3291	2327	2459	2861	2688	3123	1969	2786	3503	2630	5080	4005	1968	2076
ATCGAAAGGATGGGAGTACTAAGCTTCTCAGCAGATAAGGTGTATGGTTATCTGGAAAATGGCAAATAAATTTGAGGATAAGGCCTGACTTTATCTTTCAACAGGCAAATACCCCAAGACGTTTAGTCAGCACGGACAAAGTACTGAGAT	TCTCAGCAGATAAGGTGTATGGTTATCTGGAAAATGGCAAATAAATTTGAGGATAAGGCCTGACTTTATCTTTCAACAGGCAAATACCCCAAGACGTTTA	cat3		N	GATAAG,TTATCT,GCAAATA-2-8	1822	1265	1284	1885	2247	2042	1254	1534	1772	1416	3347	2820	1429	1432
ATCGAAAGGATGGGAGTACTAAGCTTCGATAAGCCTTATCTGTTATCGAGATAAGAATTATCTCTTATCATGATAAGAGTTATCCTTTATCTGGATAAGAATTATCTCTTATCCCAAGACGTTTAGTCAGCACGGACAAAGTACTGAGAT	TCGATAAGCCTTATCTGTTATCGAGATAAGAATTATCTCTTATCATGATAAGAGTTATCCTTTATCTGGATAAGAATTATCTCTTATCCCAAGACGTTTA	cat3		N	GATAAG,TTATC,TTATC-4-2	446	81	587	450	1635	2000	1357	2637	482	233	461	510	1073	1415
ATCGAAAGGATGGGAGTACTAAGCTTCTCAGCACCATTTGTGTAGCAAACATAGGAAAATGGTCACTGAAGCAAACAAGGTAGCCTGACTTTGTCCGCAAACAGTGTCTTTCCCCAAGACGTTTAGTCAGCACGGACAAAGTACTGAGAT	TCTCAGCACCATTTGTGTAGCAAACATAGGAAAATGGTCACTGAAGCAAACAAGGTAGCCTGACTTTGTCCGCAAACAGTGTCTTTCCCCAAGACGTTTA	cat3		N	GCAAACA,GCAAACA,GCAAACA-1-19	2737	2050	2362	2659	3457	3337	1951	2007	1926	1527	4019	3987	1696	1653
ATCGAAAGGATGGGAGTACTAAGCTTCTCAGCAGCAAACATGTATGGGGCAAACAAAAATGGTGCAAACATTTGAGCAGCAAACATGACTTTGGCAAACAACAGTGTCGCAAACAAAGACGTTTAGTCAGCACGGACAAAGTACTGAGAT	TCTCAGCAGCAAACATGTATGGGGCAAACAAAAATGGTGCAAACATTTGAGCAGCAAACATGACTTTGGCAAACAACAGTGTCGCAAACAAAGACGTTTA	cat3		N	GCAAACA,GCAAACA,GCAAACA-2-8	1983	1676	1617	1179	1017	1045	954	591	2172	1240	2645	1668	473	509
ATCGAAAGGATGGGAGTACTAAGCTTCTCAGCACCATTTGTGTATGATAAGTAGGAAAATGGTCACTGAATGTTTACAGGTAGCCTGACTTTGTCCTGTTTACGTGTCTTTCCCCAAGACGTTTAGTCAGCACGGACAAAGTACTGAGAT	TCTCAGCACCATTTGTGTATGATAAGTAGGAAAATGGTCACTGAATGTTTACAGGTAGCCTGACTTTGTCCTGTTTACGTGTCTTTCCCCAAGACGTTTA	cat3		N	GATAAG,GTTTAC,GTTTAC-1-20	5982	3235	2520	3884	4474	5195	3820	4677	3697	3740	4871	5526	2316	2773
ATCGAAAGGATGGGAGTACTAAGCTTCGATAAGCCAGATAAGTAGATAAGAGATAAGAAAGATAACTAGATAAGAGATAAGAGAGATAATTAGATAATCGATAAGGTAGATAACCAGATAATTTAGTCAGCACGGACAAAGTACTGAGAT	TCGATAAGCCAGATAAGTAGATAAGAGATAAGAAAGATAACTAGATAAGAGATAAGAGAGATAATTAGATAATCGATAAGGTAGATAACCAGATAATTTA	cat3		N	GATAAG,AGATAA,AGATAA-4-2	249	0	1	2	9	111	25	42	81	142	543	289	61	30
ATCGAAAGGATGGGAGTACTAAGCTTGCAAACACTATTTACGTTATCGGCAAACAATATTTACCTTATCAGCAAACAATATTTACTTTATCTGCAAACAATATTTACCTTATCCCAAGACGTTTAGTCAGCACGGACAAAGTACTGAGAT	TGCAAACACTATTTACGTTATCGGCAAACAATATTTACCTTATCAGCAAACAATATTTACTTTATCTGCAAACAATATTTACCTTATCCCAAGACGTTTA	cat3		N	GCAAACA,TATTTAC,TTATC-4-1	1197	737	131	268	1717	1762	1382	2006	881	575	242	379	918	917
ATCGAAAGGATGGGAGTACTAAGCTTCTTATCTCCTTATCTGTGTTTACGATTATCTAATTATCTCTGTTTACGATTATCTAGTTATCTTTGTTTACTCTTATCTGTTTATCTCCGTTTACTTTAGTCAGCACGGACAAAGTACTGAGAT	TCTTATCTCCTTATCTGTGTTTACGATTATCTAATTATCTCTGTTTACGATTATCTAGTTATCTTTGTTTACTCTTATCTGTTTATCTCCGTTTACTTTA	cat3		N	TTATCT,TTATCT,GTTTAC-4-2	2437	294	736	986	2976	4629	1966	2516	2733	2225	2128	3107	1722	1926
ATCGAAAGGATGGGAGTACTAAGCTTCCTTATCCCCTTATCGTTTATCTGACTTATCAACTTATCCTTTATCTGACTTATCAGCTTATCTTTTATCTTCCTTATCGTCTTATCCCTTATCTTTTAGTCAGCACGGACAAAGTACTGAGAT	TCCTTATCCCCTTATCGTTTATCTGACTTATCAACTTATCCTTTATCTGACTTATCAGCTTATCTTTTATCTTCCTTATCGTCTTATCCCTTATCTTTTA	cat3		N	CTTATC,CTTATC,TTATCT-4-2	7118	4655	3481	4651	6767	7022	5476	8087	6853	5866	7087	7957	5024	5348
ATCGAAAGGATGGGAGTACTAAGCTTCTCAGCACCATTTGTGTATAGATAATAGGAAAATGGTCACTGAATAGATAAAGGTAGCCTGACTTTGTCCTGCAAATATGTCTTTCCCCAAGACGTTTAGTCAGCACGGACAAAGTACTGAGAT	TCTCAGCACCATTTGTGTATAGATAATAGGAAAATGGTCACTGAATAGATAAAGGTAGCCTGACTTTGTCCTGCAAATATGTCTTTCCCCAAGACGTTTA	cat3		N	AGATAA,AGATAA,GCAAATA-1-20	1035	642	343	351	1442	1925	1665	1816	1201	886	151	552	2356	2165
ATCGAAAGGATGGGAGTACTAAGCTTCTCAGCATTATCTGTGTATGGTGTTTGCGAAAATGGTATTTACATTTGAGCTTATCTCCTGACTTTGTTTGCCAACAGTGTATTTACCCAAGACGTTTAGTCAGCACGGACAAAGTACTGAGAT	TCTCAGCATTATCTGTGTATGGTGTTTGCGAAAATGGTATTTACATTTGAGCTTATCTCCTGACTTTGTTTGCCAACAGTGTATTTACCCAAGACGTTTA	cat3		N	TTATCT,TGTTTGC,TATTTAC-2-8	2538	1857	819	1528	4264	4271	1354	1929	2304	1744	2163	4290	1849	3037
ATCGAAAGGATGGGAGTACTAAGCTTCTCAGCAAGATAAGTGTATGGTATTTACGAAAATGGTATTTACATTTGAGCAGATAACCTGACTTTATTTACCAACAGTGTATTTACCCAAGACGTTTAGTCAGCACGGACAAAGTACTGAGAT	TCTCAGCAAGATAAGTGTATGGTATTTACGAAAATGGTATTTACATTTGAGCAGATAACCTGACTTTATTTACCAACAGTGTATTTACCCAAGACGTTTA	cat3		N	AGATAA,TATTTAC,TATTTAC-2-8	1899	1648	866	1173	2880	2999	1382	1962	3584	2459	4429	3627	1846	1685
ATCGAAAGGATGGGAGTACTAAGCTTCTCAGCACCATTTGTGTATGATAAGTAGGAAAATGGTCACTGAATCTTATCAGGTAGCCTGACTTTGTCCTAGATAAGTGTCTTTCCCCAAGACGTTTAGTCAGCACGGACAAAGTACTGAGAT	TCTCAGCACCATTTGTGTATGATAAGTAGGAAAATGGTCACTGAATCTTATCAGGTAGCCTGACTTTGTCCTAGATAAGTGTCTTTCCCCAAGACGTTTA	cat3		N	GATAAG,CTTATC,AGATAA-1-20	2124	1394	1374	1504	3391	3833	2767	3470	1601	1417	2798	2641	1803	2032
ATCGAAAGGATGGGAGTACTAAGCTTCTCAGCACCTTATCTGTATGGGATTATCTAAAATGGTCGTTTACTTTGAGCAGCTTATCTGACTTTGTTTATCTACAGTGTCTGTTTACAAGACGTTTAGTCAGCACGGACAAAGTACTGAGAT	TCTCAGCACCTTATCTGTATGGGATTATCTAAAATGGTCGTTTACTTTGAGCAGCTTATCTGACTTTGTTTATCTACAGTGTCTGTTTACAAGACGTTTA	cat3		N	CTTATC,TTATCT,GTTTAC-2-9	3728	2601	1142	1314	2847	3403	1314	2749	4282	3069	1917	2322	2139	2657
ATCGAAAGGATGGGAGTACTAAGCTTCTCAGCACCATTTGTGTATGATAAGTAGGAAAATGGTCACTGAATGATAAGAGGTAGCCTGACTTTGTCCTTATTTACTGTCTTTCCCCAAGACGTTTAGTCAGCACGGACAAAGTACTGAGAT	TCTCAGCACCATTTGTGTATGATAAGTAGGAAAATGGTCACTGAATGATAAGAGGTAGCCTGACTTTGTCCTTATTTACTGTCTTTCCCCAAGACGTTTA	cat3		N	GATAAG,GATAAG,TATTTAC-1-20	2151	1372	2380	1787	3273	3667	2098	3419	1937	1554	3881	1631	1887	1744
ATCGAAAGGATGGGAGTACTAAGCTTCTCAGCACCATTTGTGTATGATAAGTAGGAAAATGGTCACTGAATTGTTTGCGGTAGCCTGACTTTGTCCTTTATTTACGTCTTTCCCCAAGACGTTTAGTCAGCACGGACAAAGTACTGAGAT	TCTCAGCACCATTTGTGTATGATAAGTAGGAAAATGGTCACTGAATTGTTTGCGGTAGCCTGACTTTGTCCTTTATTTACGTCTTTCCCCAAGACGTTTA	cat3		N	GATAAG,TGTTTGC,TATTTAC-1-20	4628	4150	4425	4066	4004	4601	2289	2585	4867	4089	7545	6586	2126	2613
ATCGAAAGGATGGGAGTACTAAGCTTCTCAGCACCATTTGTGTATCTTATCTAGGAAAATGGTCACTGAATCTTATCAGGTAGCCTGACTTTGTCCTTTATCTGTGTCTTTCCCCAAGACGTTTAGTCAGCACGGACAAAGTACTGAGAT	TCTCAGCACCATTTGTGTATCTTATCTAGGAAAATGGTCACTGAATCTTATCAGGTAGCCTGACTTTGTCCTTTATCTGTGTCTTTCCCCAAGACGTTTA	cat3		N	CTTATC,CTTATC,TTATCT-1-20	2710	1789	1717	1758	4180	5017	2966	4622	2830	1904	4239	3298	3527	3098
ATCGAAAGGATGGGAGTACTAAGCTTCTCAGCACCATTTGTGTATTTATCTTAGGAAAATGGTCACTGAATTTATCTAGGTAGCCTGACTTTGTCCTTATTTACTGTCTTTCCCCAAGACGTTTAGTCAGCACGGACAAAGTACTGAGAT	TCTCAGCACCATTTGTGTATTTATCTTAGGAAAATGGTCACTGAATTTATCTAGGTAGCCTGACTTTGTCCTTATTTACTGTCTTTCCCCAAGACGTTTA	cat3		N	TTATCT,TTATCT,TATTTAC-1-20	2152	1418	1581	1209	2732	2875	1176	2142	2636	1747	2679	1728	1603	1396
ATCGAAAGGATGGGAGTACTAAGCTTCTCAGCACAGATAATGTATGGGAAGATAAAAAATGGTCTTATCTTTTGAGCAGAGATAATGACTTTGTAGATAAACAGTGTCTTTATCTAAGACGTTTAGTCAGCACGGACAAAGTACTGAGAT	TCTCAGCACAGATAATGTATGGGAAGATAAAAAATGGTCTTATCTTTTGAGCAGAGATAATGACTTTGTAGATAAACAGTGTCTTTATCTAAGACGTTTA	cat3		N	AGATAA,AGATAA,TTATCT-2-9	864	577	600	489	1010	1016	849	1147	1231	696	1176	1784	780	1053
ATCGAAAGGATGGGAGTACTAAGCTTAGATAAATGTTTGCTTATTTACAAGATAAATGTTTGCCTATTTACTAGATAAGTGTTTGCGTATTTACCAGATAACTGTTTGCTTATTTACGACGTTTAGTCAGCACGGACAAAGTACTGAGAT	TAGATAAATGTTTGCTTATTTACAAGATAAATGTTTGCCTATTTACTAGATAAGTGTTTGCGTATTTACCAGATAACTGTTTGCTTATTTACGACGTTTA	cat3		N	AGATAA,TGTTTGC,TATTTAC-4-1	219	76	21	123	792	853	181	581	152	81	219	281	205	336
ATCGAAAGGATGGGAGTACTAAGCTTCTCAGCACTTATCGTGTATGGAGATAAGGAAAATGGCAAATAAATTTGAGCTTATCGCCTGACTAGATAATTCAACAGGCAAATACCCCAAGACGTTTAGTCAGCACGGACAAAGTACTGAGAT	TCTCAGCACTTATCGTGTATGGAGATAAGGAAAATGGCAAATAAATTTGAGCTTATCGCCTGACTAGATAATTCAACAGGCAAATACCCCAAGACGTTTA	cat3		N	CTTATC,AGATAA,GCAAATA-2-8	1440	880	929	1126	1382	1543	430	863	1130	969	1871	1109	819	905
ATCGAAAGGATGGGAGTACTAAGCTTCTCAGCAGATAAGGTGTATGGAGATAAGGAAAATGTGTTTGCAATTTGAGGATAAGGCCTGACTAGATAATTCAACAGTGTTTGCCCCCAAGACGTTTAGTCAGCACGGACAAAGTACTGAGAT	TCTCAGCAGATAAGGTGTATGGAGATAAGGAAAATGTGTTTGCAATTTGAGGATAAGGCCTGACTAGATAATTCAACAGTGTTTGCCCCCAAGACGTTTA	cat3		N	GATAAG,AGATAA,TGTTTGC-2-8	1957	1021	880	1924	1375	1662	941	1161	1033	764	760	1882	1054	1160
ATCGAAAGGATGGGAGTACTAAGCTTGATAAGAGCAAACATGCAAACAAGATAAGAGCAAACACGCAAACATGATAAGGGCAAACAGGCAAACACGATAAGCGCAAACATGCAAACAGACGTTTAGTCAGCACGGACAAAGTACTGAGAT	TGATAAGAGCAAACATGCAAACAAGATAAGAGCAAACACGCAAACATGATAAGGGCAAACAGGCAAACACGATAAGCGCAAACATGCAAACAGACGTTTA	cat3		N	GATAAG,GCAAACA,GCAAACA-4-1	675	271	204	145	229	380	125	63	452	305	355	149	204	104
ATCGAAAGGATGGGAGTACTAAGCTTGATAAGATTATCTGTGTTTGCGGATAAGGTTATCTGTGTTTGCAGATAAGCTTATCTCTGTTTGCTGATAAGCTTATCTGTGTTTGCCCAAGACGTTTAGTCAGCACGGACAAAGTACTGAGAT	TGATAAGATTATCTGTGTTTGCGGATAAGGTTATCTGTGTTTGCAGATAAGCTTATCTCTGTTTGCTGATAAGCTTATCTGTGTTTGCCCAAGACGTTTA	cat3		N	GATAAG,TTATCT,TGTTTGC-4-1	1968	987	1007	1354	2529	2536	1023	1658	2586	2104	3007	4487	1186	1603
ATCGAAAGGATGGGAGTACTAAGCTTCAGATAACCTTATCTGTGTTTACGAAGATAAAATTATCTCTGTTTACGAAGATAAAGTTATCTTTGTTTACTCAGATAAGTTTATCTCCGTTTACTTTAGTCAGCACGGACAAAGTACTGAGAT	TCAGATAACCTTATCTGTGTTTACGAAGATAAAATTATCTCTGTTTACGAAGATAAAGTTATCTTTGTTTACTCAGATAAGTTTATCTCCGTTTACTTTA	cat3		N	AGATAA,TTATCT,GTTTAC-4-2	1979	1094	2175	1524	1824	1621	1139	1652	1913	2100	4020	3818	1397	1228
ATCGAAAGGATGGGAGTACTAAGCTTCTCAGCACCATTTGTGTATGATAAGTAGGAAAATGGTCACTGAATCTTATCAGGTAGCCTGACTTTGTCCTGCAAATATGTCTTTCCCCAAGACGTTTAGTCAGCACGGACAAAGTACTGAGAT	TCTCAGCACCATTTGTGTATGATAAGTAGGAAAATGGTCACTGAATCTTATCAGGTAGCCTGACTTTGTCCTGCAAATATGTCTTTCCCCAAGACGTTTA	cat3		N	GATAAG,CTTATC,GCAAATA-1-20	2293	1761	1097	2451	3545	4208	3253	4437	1773	2379	2057	2701	2725	2515
ATCGAAAGGATGGGAGTACTAAGCTTTTATCTAGCAAACATGCAAACAATTATCTAGCAAACACGCAAACATTTATCTGGCAAACAGGCAAACACTTATCTCGCAAACATGCAAACAGACGTTTAGTCAGCACGGACAAAGTACTGAGAT	TTTATCTAGCAAACATGCAAACAATTATCTAGCAAACACGCAAACATTTATCTGGCAAACAGGCAAACACTTATCTCGCAAACATGCAAACAGACGTTTA	cat3		N	TTATCT,GCAAACA,GCAAACA-4-1	420	330	123	349	423	458	226	623	470	525	308	856	215	244
ATCGAAAGGATGGGAGTACTAAGCTTCGATAAGCCAGATAAGTGTTTACGAGATAAGAAAGATAACTGTTTACGAGATAAGAGAGATAATTGTTTACTCGATAAGGTAGATAACCGTTTACTTTAGTCAGCACGGACAAAGTACTGAGAT	TCGATAAGCCAGATAAGTGTTTACGAGATAAGAAAGATAACTGTTTACGAGATAAGAGAGATAATTGTTTACTCGATAAGGTAGATAACCGTTTACTTTA	cat3		N	GATAAG,AGATAA,GTTTAC-4-2	1085	704	252	294	1051	1205	632	974	905	877	323	938	852	997
ATCGAAAGGATGGGAGTACTAAGCTTCTCAGCACCATTTGTGTATTTATCTTAGGAAAATGGTCACTGAATTTATCTAGGTAGCCTGACTTTGTCCTGCAAACATGTCTTTCCCCAAGACGTTTAGTCAGCACGGACAAAGTACTGAGAT	TCTCAGCACCATTTGTGTATTTATCTTAGGAAAATGGTCACTGAATTTATCTAGGTAGCCTGACTTTGTCCTGCAAACATGTCTTTCCCCAAGACGTTTA	cat3		N	TTATCT,TTATCT,GCAAACA-1-20	2541	1569	1499	2153	2075	2426	676	876	1964	1925	2879	4340	929	926
ATCGAAAGGATGGGAGTACTAAGCTTTTATCTATGTTTGCTTATTTACATTATCTATGTTTGCCTATTTACTTTATCTGTGTTTGCGTATTTACCTTATCTCTGTTTGCTTATTTACGACGTTTAGTCAGCACGGACAAAGTACTGAGAT	TTTATCTATGTTTGCTTATTTACATTATCTATGTTTGCCTATTTACTTTATCTGTGTTTGCGTATTTACCTTATCTCTGTTTGCTTATTTACGACGTTTA	cat3		N	TTATCT,TGTTTGC,TATTTAC-4-1	2589	1170	1239	1996	1771	2561	1576	2223	1964	2130	4394	6557	658	789
ATCGAAAGGATGGGAGTACTAAGCTTCTCAGCACCATTTGTGTAGCAAACATAGGAAAATGGTCACTGAATATTTACAGGTAGCCTGACTTTGTCCGCAAATAGTGTCTTTCCCCAAGACGTTTAGTCAGCACGGACAAAGTACTGAGAT	TCTCAGCACCATTTGTGTAGCAAACATAGGAAAATGGTCACTGAATATTTACAGGTAGCCTGACTTTGTCCGCAAATAGTGTCTTTCCCCAAGACGTTTA	cat3		N	GCAAACA,TATTTAC,GCAAATA-1-19	2618	1822	1503	2532	2528	2678	1513	1686	1998	1796	2745	3468	1410	1402
ATCGAAAGGATGGGAGTACTAAGCTTCTCAGCACGTTTACTGTATGGGATTATCGAAAATGGTGCAAATATTTGAGCAGGTTTACTGACTTTGTTTATCAACAGTGTCGCAAATAAAGACGTTTAGTCAGCACGGACAAAGTACTGAGAT	TCTCAGCACGTTTACTGTATGGGATTATCGAAAATGGTGCAAATATTTGAGCAGGTTTACTGACTTTGTTTATCAACAGTGTCGCAAATAAAGACGTTTA	cat3		N	GTTTAC,TTATC,GCAAATA-2-9	661	405	181	366	2019	2118	1285	2000	776	567	614	306	1135	1312
ATCGAAAGGATGGGAGTACTAAGCTTCTCAGCACCATTTGTGTATAGATAATAGGAAAATGGTCACTGAATAGATAAAGGTAGCCTGACTTTGTCCTTTATCTGTGTCTTTCCCCAAGACGTTTAGTCAGCACGGACAAAGTACTGAGAT	TCTCAGCACCATTTGTGTATAGATAATAGGAAAATGGTCACTGAATAGATAAAGGTAGCCTGACTTTGTCCTTTATCTGTGTCTTTCCCCAAGACGTTTA	cat3		N	AGATAA,AGATAA,TTATCT-1-20	3467	2722	2161	2141	2478	2775	1577	2184	3067	2646	4159	3285	1699	1501
ATCGAAAGGATGGGAGTACTAAGCTTCTCAGCAGATAAGGTGTATGGGATAAGGGAAAATGGCAAACAAATTTGAGGATAAGGCCTGACTGATAAGTTCAACAGGCAAACACCCCAAGACGTTTAGTCAGCACGGACAAAGTACTGAGAT	TCTCAGCAGATAAGGTGTATGGGATAAGGGAAAATGGCAAACAAATTTGAGGATAAGGCCTGACTGATAAGTTCAACAGGCAAACACCCCAAGACGTTTA	cat3		N	GATAAG,GATAAG,GCAAACA-2-8	847	850	472	454	1424	1635	828	1608	836	734	879	538	1055	963
ATCGAAAGGATGGGAGTACTAAGCTTCGCAAACACATTATCGTTTATCAGGCAAACAAATTATCACTTATCTTGCAAACATATTATCACTTATCCCGCAAACAGTTTATCTCTTATCGACGTTTAGTCAGCACGGACAAAGTACTGAGAT	TCGCAAACACATTATCGTTTATCAGGCAAACAAATTATCACTTATCTTGCAAACATATTATCACTTATCCCGCAAACAGTTTATCTCTTATCGACGTTTA	cat3		N	GCAAACA,TTATC,TTATC-4-2	1315	861	506	780	2201	2327	2898	4649	1570	815	1383	2231	695	844
ATCGAAAGGATGGGAGTACTAAGCTTCTCAGCACCATTTGTGTATTTATCTTAGGAAAATGGTCACTGAATTTATCTAGGTAGCCTGACTTTGTCCTTTATCTGTGTCTTTCCCCAAGACGTTTAGTCAGCACGGACAAAGTACTGAGAT	TCTCAGCACCATTTGTGTATTTATCTTAGGAAAATGGTCACTGAATTTATCTAGGTAGCCTGACTTTGTCCTTTATCTGTGTCTTTCCCCAAGACGTTTA	cat3		N	TTATCT,TTATCT,TTATCT-1-20	1735	1185	640	2272	3657	3476	2345	2343	1702	1472	1629	3572	1861	1811
ATCGAAAGGATGGGAGTACTAAGCTTGATAAGATGTTTGCTTGTTTGCAGATAAGATGTTTGCCTGTTTGCTGATAAGGTGTTTGCGTGTTTGCCGATAAGCTGTTTGCTTGTTTGCGACGTTTAGTCAGCACGGACAAAGTACTGAGAT	TGATAAGATGTTTGCTTGTTTGCAGATAAGATGTTTGCCTGTTTGCTGATAAGGTGTTTGCGTGTTTGCCGATAAGCTGTTTGCTTGTTTGCGACGTTTA	cat3		N	GATAAG,TGTTTGC,TGTTTGC-4-1	1655	1072	1005	1042	1736	2332	1411	1039	1398	1647	2468	2395	908	1097
ATCGAAAGGATGGGAGTACTAAGCTTCTCAGCACGATAAGTGTATGGGAGATAAGAAAATGGTCCTTATCTTTGAGCAGGATAAGTGACTTTGTGATAAGACAGTGTCTCTTATCAAGACGTTTAGTCAGCACGGACAAAGTACTGAGAT	TCTCAGCACGATAAGTGTATGGGAGATAAGAAAATGGTCCTTATCTTTGAGCAGGATAAGTGACTTTGTGATAAGACAGTGTCTCTTATCAAGACGTTTA	cat3		N	GATAAG,GATAAG,CTTATC-2-9	2649	1519	1185	2547	2454	3000	1521	2486	2295	1693	1914	3369	2048	2209
ATCGAAAGGATGGGAGTACTAAGCTTCGTTTACCCGTTTACGTTTATCAGGTTTACAAGTTTACACTTATCTTGTTTACGTGTTTACACTTATCCCGTTTACAGGTTTACTCTTATCGACGTTTAGTCAGCACGGACAAAGTACTGAGAT	TCGTTTACCCGTTTACGTTTATCAGGTTTACAAGTTTACACTTATCTTGTTTACGTGTTTACACTTATCCCGTTTACAGGTTTACTCTTATCGACGTTTA	cat3		N	GTTTAC,GTTTAC,TTATC-4-2	2181	1960	1677	2204	5403	5834	4234	4903	2306	1677	1985	1978	2183	2190
ATCGAAAGGATGGGAGTACTAAGCTTCTCAGCACCATTTGTGTATGATAAGTAGGAAAATGGTCACTGAATCTTATCAGGTAGCCTGACTTTGTCCTGCAAACATGTCTTTCCCCAAGACGTTTAGTCAGCACGGACAAAGTACTGAGAT	TCTCAGCACCATTTGTGTATGATAAGTAGGAAAATGGTCACTGAATCTTATCAGGTAGCCTGACTTTGTCCTGCAAACATGTCTTTCCCCAAGACGTTTA	cat3		N	GATAAG,CTTATC,GCAAACA-1-20	4734	2919	2668	3896	4024	4391	1974	3077	3130	2403	5109	5411	1856	1837
ATCGAAAGGATGGGAGTACTAAGCTTCCTTATCCCGTTTACGTGTTTACGACTTATCAAGTTTACCTGTTTACGACTTATCAGGTTTACTTGTTTACTCCTTATCGTGTTTACCCGTTTACTTTAGTCAGCACGGACAAAGTACTGAGAT	TCCTTATCCCGTTTACGTGTTTACGACTTATCAAGTTTACCTGTTTACGACTTATCAGGTTTACTTGTTTACTCCTTATCGTGTTTACCCGTTTACTTTA	cat3		N	CTTATC,GTTTAC,GTTTAC-4-2	8360	5331	5241	6766	9233	9762	6259	8520	6729	5870	9103	10248	4816	4761
ATCGAAAGGATGGGAGTACTAAGCTTCTCAGCACCATTTGTGTATGTTTACTAGGAAAATGGTCACTGAATTTATCCAGGTAGCCTGACTTTGTCCGCAAATAGTGTCTTTCCCCAAGACGTTTAGTCAGCACGGACAAAGTACTGAGAT	TCTCAGCACCATTTGTGTATGTTTACTAGGAAAATGGTCACTGAATTTATCCAGGTAGCCTGACTTTGTCCGCAAATAGTGTCTTTCCCCAAGACGTTTA	cat3		N	GTTTAC,TTATC,GCAAATA-1-20	2207	1275	1032	1199	3558	3720	1695	2663	1512	1269	1589	2538	1839	2127
ATCGAAAGGATGGGAGTACTAAGCTTCTCAGCAGATAAGGTGTATGGAGATAAGGAAAATGGCAAATAAATTTGAGGATAAGGCCTGACTAGATAATTCAACAGGCAAATACCCCAAGACGTTTAGTCAGCACGGACAAAGTACTGAGAT	TCTCAGCAGATAAGGTGTATGGAGATAAGGAAAATGGCAAATAAATTTGAGGATAAGGCCTGACTAGATAATTCAACAGGCAAATACCCCAAGACGTTTA	cat3		N	GATAAG,AGATAA,GCAAATA-2-8	3020	1796	1080	1875	743	815	472	472	2155	1722	2512	2316	393	309
ATCGAAAGGATGGGAGTACTAAGCTTCTCAGCACCATTTGTGTATGATAAGTAGGAAAATGGTCACTGAATGTTTACAGGTAGCCTGACTTTGTCCTGCAAATATGTCTTTCCCCAAGACGTTTAGTCAGCACGGACAAAGTACTGAGAT	TCTCAGCACCATTTGTGTATGATAAGTAGGAAAATGGTCACTGAATGTTTACAGGTAGCCTGACTTTGTCCTGCAAATATGTCTTTCCCCAAGACGTTTA	cat3		N	GATAAG,GTTTAC,GCAAATA-1-20	2116	1178	525	849	3222	3397	3161	4112	1579	1882	997	1796	2828	3182
ATCGAAAGGATGGGAGTACTAAGCTTCTCAGCACCATTTGTGTATCTTATCTAGGAAAATGGTCACTGAATTTATCTAGGTAGCCTGACTTTGTCCTGCAAATATGTCTTTCCCCAAGACGTTTAGTCAGCACGGACAAAGTACTGAGAT	TCTCAGCACCATTTGTGTATCTTATCTAGGAAAATGGTCACTGAATTTATCTAGGTAGCCTGACTTTGTCCTGCAAATATGTCTTTCCCCAAGACGTTTA	cat3		N	CTTATC,TTATCT,GCAAATA-1-20	2400	1842	2387	3522	3130	3061	1734	1826	2597	2553	4474	5151	1894	1951
ATCGAAAGGATGGGAGTACTAAGCTTCTCAGCACCATTTGTGTATGATAAGTAGGAAAATGGTCACTGAATAGATAAAGGTAGCCTGACTTTGTCCTTGTTTGCTGTCTTTCCCCAAGACGTTTAGTCAGCACGGACAAAGTACTGAGAT	TCTCAGCACCATTTGTGTATGATAAGTAGGAAAATGGTCACTGAATAGATAAAGGTAGCCTGACTTTGTCCTTGTTTGCTGTCTTTCCCCAAGACGTTTA	cat3		N	GATAAG,AGATAA,TGTTTGC-1-20	2644	1598	1775	2241	3432	3879	2129	3252	2405	1976	2046	2212	2194	2023
ATCGAAAGGATGGGAGTACTAAGCTTCTCAGCACTTATCGTGTATGGTATTTACGAAAATGGTATTTACATTTGAGCCTTATCCCTGACTTTATTTACCAACAGTGTATTTACCCAAGACGTTTAGTCAGCACGGACAAAGTACTGAGAT	TCTCAGCACTTATCGTGTATGGTATTTACGAAAATGGTATTTACATTTGAGCCTTATCCCTGACTTTATTTACCAACAGTGTATTTACCCAAGACGTTTA	cat3		N	CTTATC,TATTTAC,TATTTAC-2-8	1224	866	819	1354	3459	3508	1483	2475	1613	855	1857	2699	1242	1632
ATCGAAAGGATGGGAGTACTAAGCTTCTTATCTCCTTATCTGGCAAATAGATTATCTAATTATCACGCAAATAGATTATCTAGTTATCCTGCAAATATCTTATCTGTTTATCCCGCAAATATTTAGTCAGCACGGACAAAGTACTGAGAT	TCTTATCTCCTTATCTGGCAAATAGATTATCTAATTATCACGCAAATAGATTATCTAGTTATCCTGCAAATATCTTATCTGTTTATCCCGCAAATATTTA	cat3		N	TTATCT,TTATC,GCAAATA-4-2	261	119	76	235	1460	1465	1440	1588	328	322	400	358	930	1252
ATCGAAAGGATGGGAGTACTAAGCTTCCTTATCCCCTTATCGTGTTTACGACTTATCAACTTATCCTGTTTACGACTTATCAGCTTATCTTGTTTACTCCTTATCGTCTTATCCCGTTTACTTTAGTCAGCACGGACAAAGTACTGAGAT	TCCTTATCCCCTTATCGTGTTTACGACTTATCAACTTATCCTGTTTACGACTTATCAGCTTATCTTGTTTACTCCTTATCGTCTTATCCCGTTTACTTTA	cat3		N	CTTATC,CTTATC,GTTTAC-4-2	6300	3766	3591	4658	8187	8006	5486	7657	5679	4562	7797	6383	4882	5844
ATCGAAAGGATGGGAGTACTAAGCTTCTCAGCACGATAAGTGTATGGGAGATAAGAAAATGGTCTTATCTTTTGAGCAGGATAAGTGACTTTGTGATAAGACAGTGTCTTTATCTAAGACGTTTAGTCAGCACGGACAAAGTACTGAGAT	TCTCAGCACGATAAGTGTATGGGAGATAAGAAAATGGTCTTATCTTTTGAGCAGGATAAGTGACTTTGTGATAAGACAGTGTCTTTATCTAAGACGTTTA	cat3		N	GATAAG,GATAAG,TTATCT-2-9	1627	1052	734	1068	2000	1885	1431	1601	1390	1166	1224	1562	1251	1278
ATCGAAAGGATGGGAGTACTAAGCTTGATAAGAGCAAACATGCAAATAAGATAAGAGCAAACACGCAAATATGATAAGGGCAAACAGGCAAATACGATAAGCGCAAACATGCAAATAGACGTTTAGTCAGCACGGACAAAGTACTGAGAT	TGATAAGAGCAAACATGCAAATAAGATAAGAGCAAACACGCAAATATGATAAGGGCAAACAGGCAAATACGATAAGCGCAAACATGCAAATAGACGTTTA	cat3		N	GATAAG,GCAAACA,GCAAATA-4-1	186	324	134	212	740	703	339	530	272	129	171	264	364	337
ATCGAAAGGATGGGAGTACTAAGCTTCTCAGCAAGATAAGTGTATGGGCAAACAGAAAATGGGCAAATAATTTGAGCAGATAACCTGACTTGCAAACACAACAGTGGCAAATACCAAGACGTTTAGTCAGCACGGACAAAGTACTGAGAT	TCTCAGCAAGATAAGTGTATGGGCAAACAGAAAATGGGCAAATAATTTGAGCAGATAACCTGACTTGCAAACACAACAGTGGCAAATACCAAGACGTTTA	cat3		N	AGATAA,GCAAACA,GCAAATA-2-8	486	338	760	297	1087	1122	637	813	385	499	1665	960	516	709
ATCGAAAGGATGGGAGTACTAAGCTTCTCAGCACGATAAGTGTATGGGAGCAAACAAAATGGTCATTATCTTTGAGCAGGATAAGTGACTTTGTGCAAACACAGTGTCTTTTATCAAGACGTTTAGTCAGCACGGACAAAGTACTGAGAT	TCTCAGCACGATAAGTGTATGGGAGCAAACAAAATGGTCATTATCTTTGAGCAGGATAAGTGACTTTGTGCAAACACAGTGTCTTTTATCAAGACGTTTA	cat3		N	GATAAG,GCAAACA,TTATC-2-9	2632	1936	886	878	3697	3724	1007	1659	2889	2079	1953	1165	2850	2948
ATCGAAAGGATGGGAGTACTAAGCTTCTCAGCATTATCTGTGTATGGTGTTTGCGAAAATGGGTTTACAATTTGAGTTATCTGCCTGACTTGTTTGCTCAACAGTGTTTACCCCCAAGACGTTTAGTCAGCACGGACAAAGTACTGAGAT	TCTCAGCATTATCTGTGTATGGTGTTTGCGAAAATGGGTTTACAATTTGAGTTATCTGCCTGACTTGTTTGCTCAACAGTGTTTACCCCCAAGACGTTTA	cat3		N	TTATCT,TGTTTGC,GTTTAC-2-8	2610	1924	1217	2040	3869	4316	1655	1490	2742	2726	3129	4488	1604	1978
ATCGAAAGGATGGGAGTACTAAGCTTCTCAGCACCATTTGTGTATGTTATCTAGGAAAATGGTCACTGAATTTTTATCGGTAGCCTGACTTTGTCCTTCTTATCTGTCTTTCCCCAAGACGTTTAGTCAGCACGGACAAAGTACTGAGAT	TCTCAGCACCATTTGTGTATGTTATCTAGGAAAATGGTCACTGAATTTTTATCGGTAGCCTGACTTTGTCCTTCTTATCTGTCTTTCCCCAAGACGTTTA	cat3		N	TTATCT,TTATC,TTATC-1-21	2976	2291	1933	1231	3036	3682	1424	2072	2143	1930	3674	2381	1668	1786
ATCGAAAGGATGGGAGTACTAAGCTTCTCAGCACCATTTGTGTATTTATCTTAGGAAAATGGTCACTGAATGCAAACAGGTAGCCTGACTTTGTCCTTGCAAATAGTCTTTCCCCAAGACGTTTAGTCAGCACGGACAAAGTACTGAGAT	TCTCAGCACCATTTGTGTATTTATCTTAGGAAAATGGTCACTGAATGCAAACAGGTAGCCTGACTTTGTCCTTGCAAATAGTCTTTCCCCAAGACGTTTA	cat3		N	TTATCT,GCAAACA,GCAAATA-1-20	1979	1562	2059	2765	1986	2033	1032	1223	2720	2657	4982	5628	1212	1284
ATCGAAAGGATGGGAGTACTAAGCTTCTCAGCATTATCTGTGTATGGTATTTACGAAAATGGGTTTACAATTTGAGTTATCTGCCTGACTTATTTACTCAACAGTGTTTACCCCCAAGACGTTTAGTCAGCACGGACAAAGTACTGAGAT	TCTCAGCATTATCTGTGTATGGTATTTACGAAAATGGGTTTACAATTTGAGTTATCTGCCTGACTTATTTACTCAACAGTGTTTACCCCCAAGACGTTTA	cat3		N	TTATCT,TATTTAC,GTTTAC-2-8	2336	1567	1136	1387	2530	3110	1167	2353	2158	1892	2879	1983	1281	1183
ATCGAAAGGATGGGAGTACTAAGCTTCTCAGCACCATTTGTGTATTTATCTTAGGAAAATGGTCACTGAATTATTTACGGTAGCCTGACTTTGTCCTTTATTTACGTCTTTCCCCAAGACGTTTAGTCAGCACGGACAAAGTACTGAGAT	TCTCAGCACCATTTGTGTATTTATCTTAGGAAAATGGTCACTGAATTATTTACGGTAGCCTGACTTTGTCCTTTATTTACGTCTTTCCCCAAGACGTTTA	cat3		N	TTATCT,TATTTAC,TATTTAC-1-20	3584	2255	1624	1831	3386	3669	1812	2783	3495	3452	3413	4228	2016	2497
ATCGAAAGGATGGGAGTACTAAGCTTCTCAGCACAGATAATGTATGGGATATTTACAAATGGTCATTATCTTTGAGCAGAGATAATGACTTTGTTATTTACCAGTGTCTTTTATCAAGACGTTTAGTCAGCACGGACAAAGTACTGAGAT	TCTCAGCACAGATAATGTATGGGATATTTACAAATGGTCATTATCTTTGAGCAGAGATAATGACTTTGTTATTTACCAGTGTCTTTTATCAAGACGTTTA	cat3		N	AGATAA,TATTTAC,TTATC-2-9	1955	1339	1186	1788	1706	1893	858	1071	830	792	1287	1987	1409	1434
ATCGAAAGGATGGGAGTACTAAGCTTCTCAGCAAGATAAGTGTATGGGCAAACAGAAAATGGGCAAACAATTTGAGCAGATAACCTGACTTGCAAACACAACAGTGGCAAACACCAAGACGTTTAGTCAGCACGGACAAAGTACTGAGAT	TCTCAGCAAGATAAGTGTATGGGCAAACAGAAAATGGGCAAACAATTTGAGCAGATAACCTGACTTGCAAACACAACAGTGGCAAACACCAAGACGTTTA	cat3		N	AGATAA,GCAAACA,GCAAACA-2-8	1936	1656	1226	2544	690	828	121	235	1577	1091	2619	4819	209	401
ATCGAAAGGATGGGAGTACTAAGCTTCTATTTACCAGTTTACTATTATCGATATTTACATGTTTACTGTTATCGATATTTACGCGTTTACTTTTATCTCTATTTACTCGTTTACCATTATCTTTAGTCAGCACGGACAAAGTACTGAGAT	TCTATTTACCAGTTTACTATTATCGATATTTACATGTTTACTGTTATCGATATTTACGCGTTTACTTTTATCTCTATTTACTCGTTTACCATTATCTTTA	cat3		N	TATTTAC,GTTTAC,TTATC-4-2	2361	492	1531	1317	1789	2475	1462	1715	1730	2040	4971	3822	676	761
ATCGAAAGGATGGGAGTACTAAGCTTGATAAGACTTATCGGCAAACAGGATAAGGCTTATCGGCAAACAAGATAAGCCTTATCCGCAAACATGATAAGCCTTATCGGCAAACACCAAGACGTTTAGTCAGCACGGACAAAGTACTGAGAT	TGATAAGACTTATCGGCAAACAGGATAAGGCTTATCGGCAAACAAGATAAGCCTTATCCGCAAACATGATAAGCCTTATCGGCAAACACCAAGACGTTTA	cat3		N	GATAAG,CTTATC,GCAAACA-4-1	1992	1480	1436	1089	2066	1906	1852	1277	1797	1292	1557	1075	1126	1115
ATCGAAAGGATGGGAGTACTAAGCTTCTCAGCACCATTTGTGTATGTTATCTAGGAAAATGGTCACTGAATTTTATCAGGTAGCCTGACTTTGTCCTTTTATCGTGTCTTTCCCCAAGACGTTTAGTCAGCACGGACAAAGTACTGAGAT	TCTCAGCACCATTTGTGTATGTTATCTAGGAAAATGGTCACTGAATTTTATCAGGTAGCCTGACTTTGTCCTTTTATCGTGTCTTTCCCCAAGACGTTTA	cat3		N	TTATC,TTATC,TTATC-1-21	3614	2538	2000	3712	3932	4656	3231	3892	3441	2698	3620	4853	2200	2366
ATCGAAAGGATGGGAGTACTAAGCTTCTCAGCATTATCTGTGTATGGGCAAATAGAAAATGGGCAAATAATTTGAGCTTATCTCCTGACTTGCAAATACAACAGTGGCAAATACCAAGACGTTTAGTCAGCACGGACAAAGTACTGAGAT	TCTCAGCATTATCTGTGTATGGGCAAATAGAAAATGGGCAAATAATTTGAGCTTATCTCCTGACTTGCAAATACAACAGTGGCAAATACCAAGACGTTTA	cat3		N	TTATCT,GCAAATA,GCAAATA-2-8	581	669	255	491	1146	1619	659	948	987	512	679	867	469	606
ATCGAAAGGATGGGAGTACTAAGCTTCTCAGCATATTTACTGTATGGGGTTTACGAAAATGGGTTTACAATTTGAGTATTTACCCTGACTTGTTTACTCAACAGTGTTTACCCCCAAGACGTTTAGTCAGCACGGACAAAGTACTGAGAT	TCTCAGCATATTTACTGTATGGGGTTTACGAAAATGGGTTTACAATTTGAGTATTTACCCTGACTTGTTTACTCAACAGTGTTTACCCCCAAGACGTTTA	cat3		N	TATTTAC,GTTTAC,GTTTAC-2-8	1693	1473	1373	1365	1757	2444	550	1081	2264	1252	2568	2202	940	1004
ATCGAAAGGATGGGAGTACTAAGCTTCCTTATCCCGCAAACATATTATCGACTTATCAAGCAAACATGTTATCGACTTATCAGGCAAACATTTTATCTCCTTATCGTGCAAACACATTATCTTTAGTCAGCACGGACAAAGTACTGAGAT	TCCTTATCCCGCAAACATATTATCGACTTATCAAGCAAACATGTTATCGACTTATCAGGCAAACATTTTATCTCCTTATCGTGCAAACACATTATCTTTA	cat3		N	CTTATC,GCAAACA,TTATC-4-2	2795	1679	1449	1904	3224	3334	2948	3070	2196	2072	2746	3803	1583	1739
ATCGAAAGGATGGGAGTACTAAGCTTCTCAGCACCATTTGTGTATCTTATCTAGGAAAATGGTCACTGAATGCAAACAGGTAGCCTGACTTTGTCCTTGCAAATAGTCTTTCCCCAAGACGTTTAGTCAGCACGGACAAAGTACTGAGAT	TCTCAGCACCATTTGTGTATCTTATCTAGGAAAATGGTCACTGAATGCAAACAGGTAGCCTGACTTTGTCCTTGCAAATAGTCTTTCCCCAAGACGTTTA	cat3		N	CTTATC,GCAAACA,GCAAATA-1-20	4146	3482	3887	5836	2818	3238	2091	2104	3666	3081	5571	6134	2030	1975
ATCGAAAGGATGGGAGTACTAAGCTTTGTTTGCCGCAAACAGTTATCGTGTTTGCAGCAAACACTTATCATGTTTGCAGCAAACATTTATCTTGTTTGCAGCAAACACTTATCCCAAGACGTTTAGTCAGCACGGACAAAGTACTGAGAT	TTGTTTGCCGCAAACAGTTATCGTGTTTGCAGCAAACACTTATCATGTTTGCAGCAAACATTTATCTTGTTTGCAGCAAACACTTATCCCAAGACGTTTA	cat3		N	TGTTTGC,GCAAACA,TTATC-4-1	2771	1439	2128	2340	858	1012	572	820	2157	2138	5135	3050	616	864
ATCGAAAGGATGGGAGTACTAAGCTTCTCAGCACCATTTGTGTATCTTATCTAGGAAAATGGTCACTGAATCTTATCAGGTAGCCTGACTTTGTCCTAGATAAGTGTCTTTCCCCAAGACGTTTAGTCAGCACGGACAAAGTACTGAGAT	TCTCAGCACCATTTGTGTATCTTATCTAGGAAAATGGTCACTGAATCTTATCAGGTAGCCTGACTTTGTCCTAGATAAGTGTCTTTCCCCAAGACGTTTA	cat3		N	CTTATC,CTTATC,AGATAA-1-20	4509	3000	1919	3066	3896	4694	2157	2618	3869	3210	3043	4308	2707	3046
ATCGAAAGGATGGGAGTACTAAGCTTCTTATCATGTTTGCTGTTTACGCTTATCGTGTTTGCTGTTTACACTTATCCTGTTTGCCGTTTACTCTTATCCTGTTTGCTGTTTACCCAAGACGTTTAGTCAGCACGGACAAAGTACTGAGAT	TCTTATCATGTTTGCTGTTTACGCTTATCGTGTTTGCTGTTTACACTTATCCTGTTTGCCGTTTACTCTTATCCTGTTTGCTGTTTACCCAAGACGTTTA	cat3		N	CTTATC,TGTTTGC,GTTTAC-4-1	3474	2386	1745	2523	4893	5803	2988	3240	3968	3234	4264	4953	2065	2448
ATCGAAAGGATGGGAGTACTAAGCTTCTCAGCACCATTTGTGTATTTATCTTAGGAAAATGGTCACTGAATGCAAACAGGTAGCCTGACTTTGTCCTTTATTTACGTCTTTCCCCAAGACGTTTAGTCAGCACGGACAAAGTACTGAGAT	TCTCAGCACCATTTGTGTATTTATCTTAGGAAAATGGTCACTGAATGCAAACAGGTAGCCTGACTTTGTCCTTTATTTACGTCTTTCCCCAAGACGTTTA	cat3		N	TTATCT,GCAAACA,TATTTAC-1-20	2193	1790	1949	2207	3212	3382	2360	2459	2456	1669	3004	3137	1787	2067
ATCGAAAGGATGGGAGTACTAAGCTTCTCAGCACCATTTGTGTATGTTTGCTAGGAAAATGGTCACTGAAGCAAACAAGGTAGCCTGACTTTGTCCGCAAACAGTGTCTTTCCCCAAGACGTTTAGTCAGCACGGACAAAGTACTGAGAT	TCTCAGCACCATTTGTGTATGTTTGCTAGGAAAATGGTCACTGAAGCAAACAAGGTAGCCTGACTTTGTCCGCAAACAGTGTCTTTCCCCAAGACGTTTA	cat3		N	TGTTTGC,GCAAACA,GCAAACA-1-19	1160	780	992	1030	3110	3417	1582	1876	851	886	2335	1704	1734	1877
ATCGAAAGGATGGGAGTACTAAGCTTCTCAGCAAGATAAGTGTATGGAGATAAGGAAAATGTATTTACAATTTGAGAGATAAGCCTGACTAGATAATTCAACAGTATTTACCCCCAAGACGTTTAGTCAGCACGGACAAAGTACTGAGAT	TCTCAGCAAGATAAGTGTATGGAGATAAGGAAAATGTATTTACAATTTGAGAGATAAGCCTGACTAGATAATTCAACAGTATTTACCCCCAAGACGTTTA	cat3		N	AGATAA,AGATAA,TATTTAC-2-8	1035	973	1019	2124	831	809	699	565	1520	1463	3269	3574	833	711
ATCGAAAGGATGGGAGTACTAAGCTTGATAAGATGTTTGCTTATTTACAGATAAGATGTTTGCCTATTTACTGATAAGGTGTTTGCGTATTTACCGATAAGCTGTTTGCTTATTTACGACGTTTAGTCAGCACGGACAAAGTACTGAGAT	TGATAAGATGTTTGCTTATTTACAGATAAGATGTTTGCCTATTTACTGATAAGGTGTTTGCGTATTTACCGATAAGCTGTTTGCTTATTTACGACGTTTA	cat3		N	GATAAG,TGTTTGC,TATTTAC-4-1	1005	949	720	1059	2103	2167	858	1654	1126	684	1264	1183	864	1016
ATCGAAAGGATGGGAGTACTAAGCTTTTATCTATGTTTGCTGCAAATAATTATCTATGTTTGCCGCAAATATTTATCTGTGTTTGCGGCAAATACTTATCTCTGTTTGCTGCAAATAGACGTTTAGTCAGCACGGACAAAGTACTGAGAT	TTTATCTATGTTTGCTGCAAATAATTATCTATGTTTGCCGCAAATATTTATCTGTGTTTGCGGCAAATACTTATCTCTGTTTGCTGCAAATAGACGTTTA	cat3		N	TTATCT,TGTTTGC,GCAAATA-4-1	892	639	567	587	518	676	92	306	258	195	1108	511	100	45
ATCGAAAGGATGGGAGTACTAAGCTTCTTATCTCCTTATCTGTTTATCTGATTATCTAATTATCTCTTTATCTGATTATCTAGTTATCTTTTTATCTTCTTATCTGTTTATCTCCTTATCTTTTAGTCAGCACGGACAAAGTACTGAGAT	TCTTATCTCCTTATCTGTTTATCTGATTATCTAATTATCTCTTTATCTGATTATCTAGTTATCTTTTTATCTTCTTATCTGTTTATCTCCTTATCTTTTA	cat3		N	TTATCT,TTATCT,TTATCT-4-2	2530	0	0	1	3	301	3	112	215	32	1783	2085	483	487
ATCGAAAGGATGGGAGTACTAAGCTTCTCAGCACCATTTGTGTATCTTATCTAGGAAAATGGTCACTGAATAGATAAAGGTAGCCTGACTTTGTCCTTATTTACTGTCTTTCCCCAAGACGTTTAGTCAGCACGGACAAAGTACTGAGAT	TCTCAGCACCATTTGTGTATCTTATCTAGGAAAATGGTCACTGAATAGATAAAGGTAGCCTGACTTTGTCCTTATTTACTGTCTTTCCCCAAGACGTTTA	cat3		N	CTTATC,AGATAA,TATTTAC-1-20	1378	925	598	1126	2609	2589	979	1626	1259	1184	1639	1566	1897	2072
ATCGAAAGGATGGGAGTACTAAGCTTCTCAGCACCATTTGTGTATCTTATCTAGGAAAATGGTCACTGAATTGTTTGCGGTAGCCTGACTTTGTCCTTTGTTTGCGTCTTTCCCCAAGACGTTTAGTCAGCACGGACAAAGTACTGAGAT	TCTCAGCACCATTTGTGTATCTTATCTAGGAAAATGGTCACTGAATTGTTTGCGGTAGCCTGACTTTGTCCTTTGTTTGCGTCTTTCCCCAAGACGTTTA	cat3		N	CTTATC,TGTTTGC,TGTTTGC-1-20	4205	2905	2404	3223	3772	4113	2061	3375	4634	3874	4411	4780	3026	3135
ATCGAAAGGATGGGAGTACTAAGCTTCTCAGCACTATTTACGTATGGGAGTTATCAAAATGGTCTTATCATTTGAGCATATTTACTGACTTTGTTTATCAACAGTGTCTTATCCCAAGACGTTTAGTCAGCACGGACAAAGTACTGAGAT	TCTCAGCACTATTTACGTATGGGAGTTATCAAAATGGTCTTATCATTTGAGCATATTTACTGACTTTGTTTATCAACAGTGTCTTATCCCAAGACGTTTA	cat3		N	TATTTAC,TTATC,TTATC-2-9	3961	2082	1887	2614	3447	3318	1244	2236	2961	2532	4876	4578	1680	1683
ATCGAAAGGATGGGAGTACTAAGCTTCAGATAACCGTTTACGTGTTTACGAAGATAAAAGTTTACCTGTTTACGAAGATAAAGGTTTACTTGTTTACTCAGATAAGTGTTTACCCGTTTACTTTAGTCAGCACGGACAAAGTACTGAGAT	TCAGATAACCGTTTACGTGTTTACGAAGATAAAAGTTTACCTGTTTACGAAGATAAAGGTTTACTTGTTTACTCAGATAAGTGTTTACCCGTTTACTTTA	cat3		N	AGATAA,GTTTAC,GTTTAC-4-2	1725	1657	899	1562	2892	3202	1993	3939	1469	1486	1851	2280	1875	1600
ATCGAAAGGATGGGAGTACTAAGCTTCTCAGCACCTTATCTGTATGGGAAGATAAAAAATGGTCGTTTACTTTGAGCAGCTTATCTGACTTTGTAGATAAACAGTGTCTGTTTACAAGACGTTTAGTCAGCACGGACAAAGTACTGAGAT	TCTCAGCACCTTATCTGTATGGGAAGATAAAAAATGGTCGTTTACTTTGAGCAGCTTATCTGACTTTGTAGATAAACAGTGTCTGTTTACAAGACGTTTA	cat3		N	CTTATC,AGATAA,GTTTAC-2-9	1898	887	869	1008	1804	1652	955	1368	1628	1024	1227	1808	1526	1990
ATCGAAAGGATGGGAGTACTAAGCTTGCAAACACGCAAACAGGCAAATAGGCAAACAAGCAAACACGCAAATAGGCAAACAAGCAAACATGCAAATATGCAAACAGGCAAACACGCAAATATTTAGTCAGCACGGACAAAGTACTGAGAT	TGCAAACACGCAAACAGGCAAATAGGCAAACAAGCAAACACGCAAATAGGCAAACAAGCAAACATGCAAATATGCAAACAGGCAAACACGCAAATATTTA	cat3		N	GCAAACA,GCAAACA,GCAAATA-4-1	289	213	197	462	230	295	98	149	298	228	443	490	119	112
ATCGAAAGGATGGGAGTACTAAGCTTCTCAGCACCATTTGTGTATCTTATCTAGGAAAATGGTCACTGAATTTATCTAGGTAGCCTGACTTTGTCCTTATTTACTGTCTTTCCCCAAGACGTTTAGTCAGCACGGACAAAGTACTGAGAT	TCTCAGCACCATTTGTGTATCTTATCTAGGAAAATGGTCACTGAATTTATCTAGGTAGCCTGACTTTGTCCTTATTTACTGTCTTTCCCCAAGACGTTTA	cat3		N	CTTATC,TTATCT,TATTTAC-1-20	3382	2410	3387	2738	4178	4529	3340	3522	3847	3014	6202	5326	2878	2922
ATCGAAAGGATGGGAGTACTAAGCTTTTATCTATTATCTGTATTTACGTTATCTGTTATCTGTATTTACATTATCTCTTATCTCTATTTACTTTATCTCTTATCTGTATTTACCCAAGACGTTTAGTCAGCACGGACAAAGTACTGAGAT	TTTATCTATTATCTGTATTTACGTTATCTGTTATCTGTATTTACATTATCTCTTATCTCTATTTACTTTATCTCTTATCTGTATTTACCCAAGACGTTTA	cat3		N	TTATCT,TTATCT,TATTTAC-4-1	411	0	0	0	1	231	2	227	54	9	410	519	140	146
ATCGAAAGGATGGGAGTACTAAGCTTCTCAGCAGATAAGGTGTATGGGCAAACAGAAAATGGGTTTACAATTTGAGGATAAGGCCTGACTGCAAACATCAACAGTGTTTACCCCCAAGACGTTTAGTCAGCACGGACAAAGTACTGAGAT	TCTCAGCAGATAAGGTGTATGGGCAAACAGAAAATGGGTTTACAATTTGAGGATAAGGCCTGACTGCAAACATCAACAGTGTTTACCCCCAAGACGTTTA	cat3		N	GATAAG,GCAAACA,GTTTAC-2-8	1605	872	668	755	2675	3002	1312	2228	1066	1104	1461	778	1233	1285
ATCGAAAGGATGGGAGTACTAAGCTTCTCAGCACCTTATCTGTATGGGACTTATCAAAATGGTCTTATCTTTTGAGCAGCTTATCTGACTTTGTCTTATCACAGTGTCTTTATCTAAGACGTTTAGTCAGCACGGACAAAGTACTGAGAT	TCTCAGCACCTTATCTGTATGGGACTTATCAAAATGGTCTTATCTTTTGAGCAGCTTATCTGACTTTGTCTTATCACAGTGTCTTTATCTAAGACGTTTA	cat3		N	CTTATC,CTTATC,TTATCT-2-9	3665	2636	2461	2529	2645	2734	1856	2087	2744	2036	3719	2208	1714	1728
ATCGAAAGGATGGGAGTACTAAGCTTGATAAGATGTTTGCTGTTTACGGATAAGGTGTTTGCTGTTTACAGATAAGCTGTTTGCCGTTTACTGATAAGCTGTTTGCTGTTTACCCAAGACGTTTAGTCAGCACGGACAAAGTACTGAGAT	TGATAAGATGTTTGCTGTTTACGGATAAGGTGTTTGCTGTTTACAGATAAGCTGTTTGCCGTTTACTGATAAGCTGTTTGCTGTTTACCCAAGACGTTTA	cat3		N	GATAAG,TGTTTGC,GTTTAC-4-1	1442	942	1117	1385	1960	2324	885	1554	1234	1187	2523	2555	962	1200
ATCGAAAGGATGGGAGTACTAAGCTTCTCAGCACCATTTGTGTATTTATCTTAGGAAAATGGTCACTGAATGCAAACAGGTAGCCTGACTTTGTCCTTTTATCGTGTCTTTCCCCAAGACGTTTAGTCAGCACGGACAAAGTACTGAGAT	TCTCAGCACCATTTGTGTATTTATCTTAGGAAAATGGTCACTGAATGCAAACAGGTAGCCTGACTTTGTCCTTTTATCGTGTCTTTCCCCAAGACGTTTA	cat3		N	TTATCT,GCAAACA,TTATC-1-20	2762	1639	1183	1704	4184	4384	2045	2633	1806	1774	1495	2635	2708	2370
ATCGAAAGGATGGGAGTACTAAGCTTCCTTATCCCCTTATCGTTTATCAGCTTATCAACTTATCACTTATCTTCTTATCGTCTTATCACTTATCCCCTTATCAGCTTATCTCTTATCGACGTTTAGTCAGCACGGACAAAGTACTGAGAT	TCCTTATCCCCTTATCGTTTATCAGCTTATCAACTTATCACTTATCTTCTTATCGTCTTATCACTTATCCCCTTATCAGCTTATCTCTTATCGACGTTTA	cat3		N	CTTATC,CTTATC,TTATC-4-2	7127	5026	3592	4674	5664	6175	3182	5142	5055	4488	5612	7776	3285	3598
ATCGAAAGGATGGGAGTACTAAGCTTCTCAGCACCATTTGTGTATGGTTTACAGGAAAATGGTCACTGAATTTTTATCGGTAGCCTGACTTTGTCCTTCTTATCTGTCTTTCCCCAAGACGTTTAGTCAGCACGGACAAAGTACTGAGAT	TCTCAGCACCATTTGTGTATGGTTTACAGGAAAATGGTCACTGAATTTTTATCGGTAGCCTGACTTTGTCCTTCTTATCTGTCTTTCCCCAAGACGTTTA	cat3		N	GTTTAC,TTATC,TTATC-1-21	2588	2007	1441	2847	4508	4576	2634	4366	2206	1871	2071	3716	2602	2994
ATCGAAAGGATGGGAGTACTAAGCTTCTCAGCATGTTTGCTGTATGGGTGTTTGCAAAATGGTTATTTACTTTGAGCATGTTTGCTGACTTTGTGTTTGCACAGTGTCTATTTACAAGACGTTTAGTCAGCACGGACAAAGTACTGAGAT	TCTCAGCATGTTTGCTGTATGGGTGTTTGCAAAATGGTTATTTACTTTGAGCATGTTTGCTGACTTTGTGTTTGCACAGTGTCTATTTACAAGACGTTTA	cat3		N	TGTTTGC,TGTTTGC,TATTTAC-2-8	1829	1381	1878	1223	2532	2952	3518	3481	2772	2412	3387	2762	1795	1761
ATCGAAAGGATGGGAGTACTAAGCTTCTTATCACTTATCGGCAAACAGCTTATCGCTTATCGGCAAACAACTTATCCCTTATCCGCAAACATCTTATCCCTTATCGGCAAACACCAAGACGTTTAGTCAGCACGGACAAAGTACTGAGAT	TCTTATCACTTATCGGCAAACAGCTTATCGCTTATCGGCAAACAACTTATCCCTTATCCGCAAACATCTTATCCCTTATCGGCAAACACCAAGACGTTTA	cat3		N	CTTATC,CTTATC,GCAAACA-4-1	1805	1610	1565	3075	1638	2149	1088	1959	1790	2142	4421	4766	832	1105
ATCGAAAGGATGGGAGTACTAAGCTTTTATCTAGCAAACATGTTTACGTTATCTGGCAAACATGTTTACATTATCTCGCAAACACGTTTACTTTATCTCGCAAACATGTTTACCCAAGACGTTTAGTCAGCACGGACAAAGTACTGAGAT	TTTATCTAGCAAACATGTTTACGTTATCTGGCAAACATGTTTACATTATCTCGCAAACACGTTTACTTTATCTCGCAAACATGTTTACCCAAGACGTTTA	cat3		N	TTATCT,GCAAACA,GTTTAC-4-1	2040	1305	733	1293	3153	3665	1354	2526	1787	1405	3115	2878	1403	1481
ATCGAAAGGATGGGAGTACTAAGCTTCTCAGCAGATAAGGTGTATGGCTTATCGGAAAATGTATTTACAATTTGAGGATAAGGCCTGACTCTTATCTTCAACAGTATTTACCCCCAAGACGTTTAGTCAGCACGGACAAAGTACTGAGAT	TCTCAGCAGATAAGGTGTATGGCTTATCGGAAAATGTATTTACAATTTGAGGATAAGGCCTGACTCTTATCTTCAACAGTATTTACCCCCAAGACGTTTA	cat3		N	GATAAG,CTTATC,TATTTAC-2-8	2021	1312	409	1087	2554	2919	1495	2308	1798	1075	791	2180	1801	1875
ATCGAAAGGATGGGAGTACTAAGCTTCTCAGCACCATTTGTGTATGAGATAAAGGAAAATGGTCACTGAATTTTTATCGGTAGCCTGACTTTGTCCTTCTTATCTGTCTTTCCCCAAGACGTTTAGTCAGCACGGACAAAGTACTGAGAT	TCTCAGCACCATTTGTGTATGAGATAAAGGAAAATGGTCACTGAATTTTTATCGGTAGCCTGACTTTGTCCTTCTTATCTGTCTTTCCCCAAGACGTTTA	cat3		N	AGATAA,TTATC,TTATC-1-21	3402	2418	1394	2703	4763	5324	3352	3423	3705	3606	2860	4325	3079	3557
ATCGAAAGGATGGGAGTACTAAGCTTCTCAGCATGTTTGCTGTATGGGTTATCGGAAAATGGCAAATAAATTTGAGTGTTTGCCCTGACTTTTATCTTCAACAGGCAAATACCCCAAGACGTTTAGTCAGCACGGACAAAGTACTGAGAT	TCTCAGCATGTTTGCTGTATGGGTTATCGGAAAATGGCAAATAAATTTGAGTGTTTGCCCTGACTTTTATCTTCAACAGGCAAATACCCCAAGACGTTTA	cat3		N	TGTTTGC,TTATC,GCAAATA-2-8	978	664	407	1109	1854	1983	1562	2475	877	950	520	1676	837	927
ATCGAAAGGATGGGAGTACTAAGCTTCTCAGCACTTATCGTGTATGGGCAAACAGAAAATGGTATTTACATTTGAGCCTTATCCCTGACTTGCAAACACAACAGTGTATTTACCCAAGACGTTTAGTCAGCACGGACAAAGTACTGAGAT	TCTCAGCACTTATCGTGTATGGGCAAACAGAAAATGGTATTTACATTTGAGCCTTATCCCTGACTTGCAAACACAACAGTGTATTTACCCAAGACGTTTA	cat3		N	CTTATC,GCAAACA,TATTTAC-2-8	2090	1179	480	961	3105	3452	1889	1685	1729	1801	1390	1727	1063	1263
ATCGAAAGGATGGGAGTACTAAGCTTCTCAGCACCATTTGTGTATGATAAGTAGGAAAATGGTCACTGAATGCAAACAGGTAGCCTGACTTTGTCCTTTTATCGTGTCTTTCCCCAAGACGTTTAGTCAGCACGGACAAAGTACTGAGAT	TCTCAGCACCATTTGTGTATGATAAGTAGGAAAATGGTCACTGAATGCAAACAGGTAGCCTGACTTTGTCCTTTTATCGTGTCTTTCCCCAAGACGTTTA	cat3		N	GATAAG,GCAAACA,TTATC-1-20	5347	3985	4993	5292	4110	4035	3753	3253	6667	5023	10363	10094	1588	1887
ATCGAAAGGATGGGAGTACTAAGCTTCTCAGCATTATCTGTGTATGGGTTTACGGAAAATGGCAAATAAATTTGAGTTATCTGCCTGACTGTTTACTTCAACAGGCAAATACCCCAAGACGTTTAGTCAGCACGGACAAAGTACTGAGAT	TCTCAGCATTATCTGTGTATGGGTTTACGGAAAATGGCAAATAAATTTGAGTTATCTGCCTGACTGTTTACTTCAACAGGCAAATACCCCAAGACGTTTA	cat3		N	TTATCT,GTTTAC,GCAAATA-2-8	2763	2183	487	2049	2824	3139	1419	2300	2581	1829	949	2685	1226	1320
ATCGAAAGGATGGGAGTACTAAGCTTCTCAGCACGTTTACTGTATGGGAGTTTACAAAATGGTCTTATCATTTGAGCAGTTTACCTGACTTTGGTTTACAACAGTGTCTTATCCCAAGACGTTTAGTCAGCACGGACAAAGTACTGAGAT	TCTCAGCACGTTTACTGTATGGGAGTTTACAAAATGGTCTTATCATTTGAGCAGTTTACCTGACTTTGGTTTACAACAGTGTCTTATCCCAAGACGTTTA	cat3		N	GTTTAC,GTTTAC,TTATC-2-9	2389	2199	2355	2896	3264	3045	2609	3566	3103	2441	3810	4771	2169	2532
ATCGAAAGGATGGGAGTACTAAGCTTGCAAACACGCAAACAGTTATCGGCAAACAAGCAAACACTTATCAGCAAACAAGCAAACATTTATCTGCAAACAAGCAAACACTTATCCCAAGACGTTTAGTCAGCACGGACAAAGTACTGAGAT	TGCAAACACGCAAACAGTTATCGGCAAACAAGCAAACACTTATCAGCAAACAAGCAAACATTTATCTGCAAACAAGCAAACACTTATCCCAAGACGTTTA	cat3		N	GCAAACA,GCAAACA,TTATC-4-1	360	257	339	589	1000	1222	435	1010	332	248	216	968	322	418
ATCGAAAGGATGGGAGTACTAAGCTTCTCAGCACCTTATCTGTATGGGAAGATAAAAAATGGTCTTATCATTTGAGCACTTATCCTGACTTTGAGATAAAACAGTGTCTTATCCCAAGACGTTTAGTCAGCACGGACAAAGTACTGAGAT	TCTCAGCACCTTATCTGTATGGGAAGATAAAAAATGGTCTTATCATTTGAGCACTTATCCTGACTTTGAGATAAAACAGTGTCTTATCCCAAGACGTTTA	cat3		N	CTTATC,AGATAA,TTATC-2-9	2067	1669	2030	1991	2101	2303	1418	1702	2301	1575	3212	2154	1228	1322
ATCGAAAGGATGGGAGTACTAAGCTTGCAAACACGCAAACAGGTTTACAGCAAACAAGCAAACAAGTTTACTGCAAACAGGCAAACAAGTTTACCGCAAACAAGCAAACATGTTTACGACGTTTAGTCAGCACGGACAAAGTACTGAGAT	TGCAAACACGCAAACAGGTTTACAGCAAACAAGCAAACAAGTTTACTGCAAACAGGCAAACAAGTTTACCGCAAACAAGCAAACATGTTTACGACGTTTA	cat3		N	GCAAACA,GCAAACA,GTTTAC-4-1	675	587	528	686	930	1291	1445	988	619	338	547	508	649	674
ATCGAAAGGATGGGAGTACTAAGCTTCTCAGCAGATAAGGTGTATGGGATAAGGGAAAATGGCAAATAAATTTGAGGATAAGGCCTGACTGATAAGTTCAACAGGCAAATACCCCAAGACGTTTAGTCAGCACGGACAAAGTACTGAGAT	TCTCAGCAGATAAGGTGTATGGGATAAGGGAAAATGGCAAATAAATTTGAGGATAAGGCCTGACTGATAAGTTCAACAGGCAAATACCCCAAGACGTTTA	cat3		N	GATAAG,GATAAG,GCAAATA-2-8	1372	702	664	1176	779	1165	277	270	1202	1057	1770	1401	480	861
ATCGAAAGGATGGGAGTACTAAGCTTCTCAGCATGTTTGCTGTATGGGGTTTACGAAAATGGGTTTACAATTTGAGTGTTTGCCCTGACTTGTTTACTCAACAGTGTTTACCCCCAAGACGTTTAGTCAGCACGGACAAAGTACTGAGAT	TCTCAGCATGTTTGCTGTATGGGGTTTACGAAAATGGGTTTACAATTTGAGTGTTTGCCCTGACTTGTTTACTCAACAGTGTTTACCCCCAAGACGTTTA	cat3		N	TGTTTGC,GTTTAC,GTTTAC-2-8	2201	1564	1485	2212	2865	3310	1776	2101	3364	2980	3260	3792	2190	2856
ATCGAAAGGATGGGAGTACTAAGCTTCTCAGCACTTATCTTGTATGGGAGTTTACAAAATGGTCGTTTACTTTGAGCAGTTATCTTGACTTTGTGTTTACACAGTGTCTGTTTACAAGACGTTTAGTCAGCACGGACAAAGTACTGAGAT	TCTCAGCACTTATCTTGTATGGGAGTTTACAAAATGGTCGTTTACTTTGAGCAGTTATCTTGACTTTGTGTTTACACAGTGTCTGTTTACAAGACGTTTA	cat3		N	TTATCT,GTTTAC,GTTTAC-2-9	1343	955	794	926	3542	3961	2585	3283	1935	1333	817	1299	2080	2463
ATCGAAAGGATGGGAGTACTAAGCTTCTCAGCACAGATAATGTATGGGAAGATAAAAAATGGTCTTATCATTTGAGCAAGATAACTGACTTTGAGATAAAACAGTGTCTTATCCCAAGACGTTTAGTCAGCACGGACAAAGTACTGAGAT	TCTCAGCACAGATAATGTATGGGAAGATAAAAAATGGTCTTATCATTTGAGCAAGATAACTGACTTTGAGATAAAACAGTGTCTTATCCCAAGACGTTTA	cat3		N	AGATAA,AGATAA,TTATC-2-9	1034	566	305	504	1705	1906	1633	3547	786	720	842	828	1286	1411
ATCGAAAGGATGGGAGTACTAAGCTTCTCAGCACGATAAGTGTATGGGAGATAAGAAAATGGTCGATAAGTTTGAGCAGGATAAGTGACTTTGTGATAAGACAGTGTCTGATAAGAAGACGTTTAGTCAGCACGGACAAAGTACTGAGAT	TCTCAGCACGATAAGTGTATGGGAGATAAGAAAATGGTCGATAAGTTTGAGCAGGATAAGTGACTTTGTGATAAGACAGTGTCTGATAAGAAGACGTTTA	cat3		N	GATAAG,GATAAG,GATAAG-2-9	952	854	593	751	1464	2020	1275	1576	974	720	1067	1548	887	1257
ATCGAAAGGATGGGAGTACTAAGCTTCTTATCACTTATCGTGCAAATAAGTTATCAATTATCTCGCAAATATTTTATCGGTTATCTGGCAAATACCTTATCCATTATCTTGCAAATAGACGTTTAGTCAGCACGGACAAAGTACTGAGAT	TCTTATCACTTATCGTGCAAATAAGTTATCAATTATCTCGCAAATATTTTATCGGTTATCTGGCAAATACCTTATCCATTATCTTGCAAATAGACGTTTA	cat3		N	TTATC,TTATC,GCAAATA-4-2	435	190	340	171	630	641	532	648	813	633	217	504	739	786
ATCGAAAGGATGGGAGTACTAAGCTTCTCAGCACCTTATCTGTATGGGAAGATAAAAAATGGTCAGATAATTTGAGCAGCTTATCTGACTTTGTAGATAAACAGTGTCTAGATAAAAGACGTTTAGTCAGCACGGACAAAGTACTGAGAT	TCTCAGCACCTTATCTGTATGGGAAGATAAAAAATGGTCAGATAATTTGAGCAGCTTATCTGACTTTGTAGATAAACAGTGTCTAGATAAAAGACGTTTA	cat3		N	CTTATC,AGATAA,AGATAA-2-9	1216	806	551	1502	1076	1013	894	641	1524	1044	1568	1577	778	723
ATCGAAAGGATGGGAGTACTAAGCTTCTCAGCACCATTTGTGTATAGATAATAGGAAAATGGTCACTGAATAGATAAAGGTAGCCTGACTTTGTCCTAGATAAGTGTCTTTCCCCAAGACGTTTAGTCAGCACGGACAAAGTACTGAGAT	TCTCAGCACCATTTGTGTATAGATAATAGGAAAATGGTCACTGAATAGATAAAGGTAGCCTGACTTTGTCCTAGATAAGTGTCTTTCCCCAAGACGTTTA	cat3		N	AGATAA,AGATAA,AGATAA-1-20	2484	1336	1001	1870	972	1239	489	815	1889	1741	1990	4328	1010	831
ATCGAAAGGATGGGAGTACTAAGCTTCTCAGCACCATTTGTGTATGCAAACAAGGAAAATGGTCACTGAATTGCAAACAGTAGCCTGACTTTGTCCTTCTTATCTGTCTTTCCCCAAGACGTTTAGTCAGCACGGACAAAGTACTGAGAT	TCTCAGCACCATTTGTGTATGCAAACAAGGAAAATGGTCACTGAATTGCAAACAGTAGCCTGACTTTGTCCTTCTTATCTGTCTTTCCCCAAGACGTTTA	cat3		N	GCAAACA,GCAAACA,TTATC-1-20	1517	1165	1604	2240	3560	3724	1971	2686	2191	2011	3541	4448	3501	3780
ATCGAAAGGATGGGAGTACTAAGCTTCTTATCATGTTTGCTTGTTTGCACTTATCATGTTTGCCTGTTTGCTCTTATCGTGTTTGCGTGTTTGCCCTTATCCTGTTTGCTTGTTTGCGACGTTTAGTCAGCACGGACAAAGTACTGAGAT	TCTTATCATGTTTGCTTGTTTGCACTTATCATGTTTGCCTGTTTGCTCTTATCGTGTTTGCGTGTTTGCCCTTATCCTGTTTGCTTGTTTGCGACGTTTA	cat3		N	CTTATC,TGTTTGC,TGTTTGC-4-1	2864	2273	2041	2216	4260	5864	1808	3232	2308	2902	5277	3888	1511	1833
ATCGAAAGGATGGGAGTACTAAGCTTCTCAGCACCATTTGTGTATGATAAGTAGGAAAATGGTCACTGAATGATAAGAGGTAGCCTGACTTTGTCCTTTATCAGTGTCTTTCCCCAAGACGTTTAGTCAGCACGGACAAAGTACTGAGAT	TCTCAGCACCATTTGTGTATGATAAGTAGGAAAATGGTCACTGAATGATAAGAGGTAGCCTGACTTTGTCCTTTATCAGTGTCTTTCCCCAAGACGTTTA	cat3		N	GATAAG,GATAAG,TTATC-1-20	2242	1666	1403	1041	3690	4305	1971	2330	1630	1533	2670	2274	1916	2226
ATCGAAAGGATGGGAGTACTAAGCTTTGTTTGCCGCAAATAGGCAAATAGTGTTTGCAGCAAATACGCAAATAGTGTTTGCAGCAAATATGCAAATATTGTTTGCGGCAAATACGCAAATATTTAGTCAGCACGGACAAAGTACTGAGAT	TTGTTTGCCGCAAATAGGCAAATAGTGTTTGCAGCAAATACGCAAATAGTGTTTGCAGCAAATATGCAAATATTGTTTGCGGCAAATACGCAAATATTTA	cat3		N	TGTTTGC,GCAAATA,GCAAATA-4-1	242	305	81	129	738	1011	396	746	706	397	70	349	629	844
ATCGAAAGGATGGGAGTACTAAGCTTCTCAGCACCTTATCTGTATGGGACTTATCAAAATGGTCAGATAATTTGAGCAGCTTATCTGACTTTGTCTTATCACAGTGTCTAGATAAAAGACGTTTAGTCAGCACGGACAAAGTACTGAGAT	TCTCAGCACCTTATCTGTATGGGACTTATCAAAATGGTCAGATAATTTGAGCAGCTTATCTGACTTTGTCTTATCACAGTGTCTAGATAAAAGACGTTTA	cat3		N	CTTATC,CTTATC,AGATAA-2-9	2017	1588	2017	1011	1654	1866	1378	1711	1639	1756	4181	2286	1286	1250
ATCGAAAGGATGGGAGTACTAAGCTTCTTATCATATTTACTGCAAATAACTTATCATATTTACCGCAAATATCTTATCGTATTTACGGCAAATACCTTATCCTATTTACTGCAAATAGACGTTTAGTCAGCACGGACAAAGTACTGAGAT	TCTTATCATATTTACTGCAAATAACTTATCATATTTACCGCAAATATCTTATCGTATTTACGGCAAATACCTTATCCTATTTACTGCAAATAGACGTTTA	cat3		N	CTTATC,TATTTAC,GCAAATA-4-1	470	141	48	361	584	678	489	579	522	306	417	367	148	180
ATCGAAAGGATGGGAGTACTAAGCTTCTCAGCAGCAAACATGTATGGGTTATCGGAAAATGGCAAATAAATTTGAGGCAAACACCTGACTTTTATCTTCAACAGGCAAATACCCCAAGACGTTTAGTCAGCACGGACAAAGTACTGAGAT	TCTCAGCAGCAAACATGTATGGGTTATCGGAAAATGGCAAATAAATTTGAGGCAAACACCTGACTTTTATCTTCAACAGGCAAATACCCCAAGACGTTTA	cat3		N	GCAAACA,TTATC,GCAAATA-2-8	909	653	530	1364	1075	983	367	735	605	608	1403	1512	373	363
ATCGAAAGGATGGGAGTACTAAGCTTCTCAGCAAGATAAGTGTATGGGCAAACAGAAAATGGGTTTACAATTTGAGAGATAAGCCTGACTGCAAACATCAACAGTGTTTACCCCCAAGACGTTTAGTCAGCACGGACAAAGTACTGAGAT	TCTCAGCAAGATAAGTGTATGGGCAAACAGAAAATGGGTTTACAATTTGAGAGATAAGCCTGACTGCAAACATCAACAGTGTTTACCCCCAAGACGTTTA	cat3		N	AGATAA,GCAAACA,GTTTAC-2-8	404	268	232	227	2126	2440	2024	1731	964	386	231	460	1155	1544
ATCGAAAGGATGGGAGTACTAAGCTTCTCAGCAGATAAGGTGTATGGTTATCTGGAAAATGGCAAACAAATTTGAGGATAAGGCCTGACTTTATCTTTCAACAGGCAAACACCCCAAGACGTTTAGTCAGCACGGACAAAGTACTGAGAT	TCTCAGCAGATAAGGTGTATGGTTATCTGGAAAATGGCAAACAAATTTGAGGATAAGGCCTGACTTTATCTTTCAACAGGCAAACACCCCAAGACGTTTA	cat3		N	GATAAG,TTATCT,GCAAACA-2-8	1840	1069	1152	1871	1651	1712	968	1418	1177	1067	2174	3204	512	730
ATCGAAAGGATGGGAGTACTAAGCTTCTCAGCACCTTATCTGTATGGGATGTTTGCAAATGGTCATTATCTTTGAGCAGCTTATCTGACTTTGTTGTTTGCCAGTGTCTTTTATCAAGACGTTTAGTCAGCACGGACAAAGTACTGAGAT	TCTCAGCACCTTATCTGTATGGGATGTTTGCAAATGGTCATTATCTTTGAGCAGCTTATCTGACTTTGTTGTTTGCCAGTGTCTTTTATCAAGACGTTTA	cat3		N	CTTATC,TGTTTGC,TTATC-2-9	3846	2135	1067	2362	2156	2154	1760	1295	2923	2563	2712	3822	1336	1647
ATCGAAAGGATGGGAGTACTAAGCTTTTATCTATTATCTGGCAAATAGTTATCTGTTATCTGGCAAATAATTATCTCTTATCTCGCAAATATTTATCTCTTATCTGGCAAATACCAAGACGTTTAGTCAGCACGGACAAAGTACTGAGAT	TTTATCTATTATCTGGCAAATAGTTATCTGTTATCTGGCAAATAATTATCTCTTATCTCGCAAATATTTATCTCTTATCTGGCAAATACCAAGACGTTTA	cat3		N	TTATCT,TTATCT,GCAAATA-4-1	445	137	71	110	1360	1473	1406	2263	294	308	164	344	429	380
ATCGAAAGGATGGGAGTACTAAGCTTCTCAGCAAGATAAGTGTATGGTGTTTGCGAAAATGGTATTTACATTTGAGCAGATAACCTGACTTTGTTTGCCAACAGTGTATTTACCCAAGACGTTTAGTCAGCACGGACAAAGTACTGAGAT	TCTCAGCAAGATAAGTGTATGGTGTTTGCGAAAATGGTATTTACATTTGAGCAGATAACCTGACTTTGTTTGCCAACAGTGTATTTACCCAAGACGTTTA	cat3		N	AGATAA,TGTTTGC,TATTTAC-2-8	679	468	577	941	2233	2428	871	630	604	654	1365	1366	1072	1215
ATCGAAAGGATGGGAGTACTAAGCTTCCTTATCCCTTATCTGTTATCGACTTATCAATTATCTCTTATCATCTTATCAGTTATCCTTTATCTGCTTATCAATTATCTCTTATCCCAAGACGTTTAGTCAGCACGGACAAAGTACTGAGAT	TCCTTATCCCTTATCTGTTATCGACTTATCAATTATCTCTTATCATCTTATCAGTTATCCTTTATCTGCTTATCAATTATCTCTTATCCCAAGACGTTTA	cat3		N	CTTATC,TTATC,TTATC-4-2	2164	967	1082	1028	3140	3741	2208	2731	1642	1385	3718	1110	1854	1647
ATCGAAAGGATGGGAGTACTAAGCTTCTCAGCACTTATCGTGTATGGAGATAAGGAAAATGGCAAACAAATTTGAGCTTATCGCCTGACTAGATAATTCAACAGGCAAACACCCCAAGACGTTTAGTCAGCACGGACAAAGTACTGAGAT	TCTCAGCACTTATCGTGTATGGAGATAAGGAAAATGGCAAACAAATTTGAGCTTATCGCCTGACTAGATAATTCAACAGGCAAACACCCCAAGACGTTTA	cat3		N	CTTATC,AGATAA,GCAAACA-2-8	662	516	540	865	1377	1559	758	1057	741	486	858	904	804	751
ATCGAAAGGATGGGAGTACTAAGCTTCTCAGCAAGATAAGTGTATGGGCAAACAGAAAATGGTATTTACATTTGAGCAGATAACCTGACTTGCAAACACAACAGTGTATTTACCCAAGACGTTTAGTCAGCACGGACAAAGTACTGAGAT	TCTCAGCAAGATAAGTGTATGGGCAAACAGAAAATGGTATTTACATTTGAGCAGATAACCTGACTTGCAAACACAACAGTGTATTTACCCAAGACGTTTA	cat3		N	AGATAA,GCAAACA,TATTTAC-2-8	1822	1026	909	1042	1746	2458	2039	1684	1911	1678	3999	2442	1518	1483
ATCGAAAGGATGGGAGTACTAAGCTTCTCAGCACCATTTGTGTATTTATCTTAGGAAAATGGTCACTGAATTATTTACGGTAGCCTGACTTTGTCCTTGCAAATAGTCTTTCCCCAAGACGTTTAGTCAGCACGGACAAAGTACTGAGAT	TCTCAGCACCATTTGTGTATTTATCTTAGGAAAATGGTCACTGAATTATTTACGGTAGCCTGACTTTGTCCTTGCAAATAGTCTTTCCCCAAGACGTTTA	cat3		N	TTATCT,TATTTAC,GCAAATA-1-20	1958	1711	1745	1169	2832	3176	2173	2389	2077	2063	2464	2034	1513	1705
ATCGAAAGGATGGGAGTACTAAGCTTCTCAGCACGATAAGTGTATGGGAGTTTACAAAATGGTCGTTTACTTTGAGCAGGATAAGTGACTTTGTGTTTACACAGTGTCTGTTTACAAGACGTTTAGTCAGCACGGACAAAGTACTGAGAT	TCTCAGCACGATAAGTGTATGGGAGTTTACAAAATGGTCGTTTACTTTGAGCAGGATAAGTGACTTTGTGTTTACACAGTGTCTGTTTACAAGACGTTTA	cat3		N	GATAAG,GTTTAC,GTTTAC-2-9	2135	1450	1135	938	2727	2937	1488	1696	1980	1976	1975	2305	1854	2020
ATCGAAAGGATGGGAGTACTAAGCTTCTCAGCAGATAAGGTGTATGGTTATCTGGAAAATGTGTTTGCAATTTGAGGATAAGGCCTGACTTTATCTTTCAACAGTGTTTGCCCCCAAGACGTTTAGTCAGCACGGACAAAGTACTGAGAT	TCTCAGCAGATAAGGTGTATGGTTATCTGGAAAATGTGTTTGCAATTTGAGGATAAGGCCTGACTTTATCTTTCAACAGTGTTTGCCCCCAAGACGTTTA	cat3		N	GATAAG,TTATCT,TGTTTGC-2-8	1972	1159	533	499	2469	2809	1237	2634	1646	1395	1234	612	1874	2045
ATCGAAAGGATGGGAGTACTAAGCTTCTCAGCACCATTTGTGTATCTTATCTAGGAAAATGGTCACTGAATTATTTACGGTAGCCTGACTTTGTCCTTGTTTACTGTCTTTCCCCAAGACGTTTAGTCAGCACGGACAAAGTACTGAGAT	TCTCAGCACCATTTGTGTATCTTATCTAGGAAAATGGTCACTGAATTATTTACGGTAGCCTGACTTTGTCCTTGTTTACTGTCTTTCCCCAAGACGTTTA	cat3		N	CTTATC,TATTTAC,GTTTAC-1-20	2114	1737	1440	1673	2933	3097	4788	5407	1917	1731	2238	2111	1539	1779
ATCGAAAGGATGGGAGTACTAAGCTTCTCAGCACCATTTGTGTAGCAAACATAGGAAAATGGTCACTGAAGCAAATAAGGTAGCCTGACTTTGTCCGCAAATAGTGTCTTTCCCCAAGACGTTTAGTCAGCACGGACAAAGTACTGAGAT	TCTCAGCACCATTTGTGTAGCAAACATAGGAAAATGGTCACTGAAGCAAATAAGGTAGCCTGACTTTGTCCGCAAATAGTGTCTTTCCCCAAGACGTTTA	cat3		N	GCAAACA,GCAAATA,GCAAATA-1-19	1884	1453	1704	2436	2546	2758	1026	1476	1806	1768	3290	2636	1356	1351
ATCGAAAGGATGGGAGTACTAAGCTTCTCAGCAGCAAACATGTATGGGTATTTACAAAATGGTGTTTACATTTGAGCGCAAACACTGACTTTTATTTACAACAGTGTGTTTACCCAAGACGTTTAGTCAGCACGGACAAAGTACTGAGAT	TCTCAGCAGCAAACATGTATGGGTATTTACAAAATGGTGTTTACATTTGAGCGCAAACACTGACTTTTATTTACAACAGTGTGTTTACCCAAGACGTTTA	cat3		N	GCAAACA,TATTTAC,GTTTAC-2-8	1032	835	711	621	1958	2090	743	1134	1100	579	1509	914	987	1122
ATCGAAAGGATGGGAGTACTAAGCTTCGATAAGCCGATAAGGTTTATCAGGATAAGAAGATAAGACTTATCTTGATAAGGTGATAAGACTTATCCCGATAAGAGGATAAGTCTTATCGACGTTTAGTCAGCACGGACAAAGTACTGAGAT	TCGATAAGCCGATAAGGTTTATCAGGATAAGAAGATAAGACTTATCTTGATAAGGTGATAAGACTTATCCCGATAAGAGGATAAGTCTTATCGACGTTTA	cat3		N	GATAAG,GATAAG,TTATC-4-2	1244	830	379	291	1098	1144	544	474	532	547	208	399	514	656
ATCGAAAGGATGGGAGTACTAAGCTTCTCAGCACGATAAGTGTATGGGAAGATAAAAAATGGTCTTATCTTTTGAGCAGGATAAGTGACTTTGTAGATAAACAGTGTCTTTATCTAAGACGTTTAGTCAGCACGGACAAAGTACTGAGAT	TCTCAGCACGATAAGTGTATGGGAAGATAAAAAATGGTCTTATCTTTTGAGCAGGATAAGTGACTTTGTAGATAAACAGTGTCTTTATCTAAGACGTTTA	cat3		N	GATAAG,AGATAA,TTATCT-2-9	1724	950	551	614	2882	2606	1425	2060	1279	1147	1294	987	2308	2376
ATCGAAAGGATGGGAGTACTAAGCTTCTCAGCACCATTTGTGTATCTTATCTAGGAAAATGGTCACTGAATAGATAAAGGTAGCCTGACTTTGTCCTAGATAAGTGTCTTTCCCCAAGACGTTTAGTCAGCACGGACAAAGTACTGAGAT	TCTCAGCACCATTTGTGTATCTTATCTAGGAAAATGGTCACTGAATAGATAAAGGTAGCCTGACTTTGTCCTAGATAAGTGTCTTTCCCCAAGACGTTTA	cat3		N	CTTATC,AGATAA,AGATAA-1-20	2792	2113	2186	2307	3623	3851	3988	6515	2971	1937	3161	3128	2412	2407
ATCGAAAGGATGGGAGTACTAAGCTTCTCAGCACTTATCGTGTATGGTTATCTGGAAAATGTATTTACAATTTGAGCTTATCGCCTGACTTTATCTTTCAACAGTATTTACCCCCAAGACGTTTAGTCAGCACGGACAAAGTACTGAGAT	TCTCAGCACTTATCGTGTATGGTTATCTGGAAAATGTATTTACAATTTGAGCTTATCGCCTGACTTTATCTTTCAACAGTATTTACCCCCAAGACGTTTA	cat3		N	CTTATC,TTATCT,TATTTAC-2-8	4604	3119	1863	3770	3772	3579	2023	2270	4091	3704	5130	5118	1615	1910
ATCGAAAGGATGGGAGTACTAAGCTTCTCAGCACCATTTGTGTATGATAAGTAGGAAAATGGTCACTGAATAGATAAAGGTAGCCTGACTTTGTCCTTTATCAGTGTCTTTCCCCAAGACGTTTAGTCAGCACGGACAAAGTACTGAGAT	TCTCAGCACCATTTGTGTATGATAAGTAGGAAAATGGTCACTGAATAGATAAAGGTAGCCTGACTTTGTCCTTTATCAGTGTCTTTCCCCAAGACGTTTA	cat3		N	GATAAG,AGATAA,TTATC-1-20	2984	2175	1449	2028	3045	3139	1841	2048	3073	2783	1825	3125	2239	2411
ATCGAAAGGATGGGAGTACTAAGCTTCTCAGCATGTTTGCTGTATGGGTGTTTGCAAAATGGTGCAAATATTTGAGCATGTTTGCTGACTTTGTGTTTGCACAGTGTCGCAAATAAAGACGTTTAGTCAGCACGGACAAAGTACTGAGAT	TCTCAGCATGTTTGCTGTATGGGTGTTTGCAAAATGGTGCAAATATTTGAGCATGTTTGCTGACTTTGTGTTTGCACAGTGTCGCAAATAAAGACGTTTA	cat3		N	TGTTTGC,TGTTTGC,GCAAATA-2-8	806	781	613	1560	1541	1699	1039	947	2412	1705	1561	2440	940	1144
ATCGAAAGGATGGGAGTACTAAGCTTCTCAGCAGATAAGGTGTATGGGATAAGGGAAAATGTATTTACAATTTGAGGATAAGGCCTGACTGATAAGTTCAACAGTATTTACCCCCAAGACGTTTAGTCAGCACGGACAAAGTACTGAGAT	TCTCAGCAGATAAGGTGTATGGGATAAGGGAAAATGTATTTACAATTTGAGGATAAGGCCTGACTGATAAGTTCAACAGTATTTACCCCCAAGACGTTTA	cat3		N	GATAAG,GATAAG,TATTTAC-2-8	2824	2023	1960	2102	1135	1607	663	781	2359	2338	3863	3221	628	643
ATCGAAAGGATGGGAGTACTAAGCTTCTTATCAAGATAAGTATTTACGCTTATCGAGATAAGTATTTACACTTATCCAGATAACTATTTACTCTTATCCAGATAAGTATTTACCCAAGACGTTTAGTCAGCACGGACAAAGTACTGAGAT	TCTTATCAAGATAAGTATTTACGCTTATCGAGATAAGTATTTACACTTATCCAGATAACTATTTACTCTTATCCAGATAAGTATTTACCCAAGACGTTTA	cat3		N	CTTATC,AGATAA,TATTTAC-4-1	609	76	187	228	489	663	263	329	519	586	470	776	282	340
ATCGAAAGGATGGGAGTACTAAGCTTCTCAGCACCTTATCTGTATGGGAGTTATCAAAATGGTCATTATCTTTGAGCAGGTTATCTGACTTTGTCTTATCACAGTGTCTTTTATCAAGACGTTTAGTCAGCACGGACAAAGTACTGAGAT	TCTCAGCACCTTATCTGTATGGGAGTTATCAAAATGGTCATTATCTTTGAGCAGGTTATCTGACTTTGTCTTATCACAGTGTCTTTTATCAAGACGTTTA	cat3		N	TTATC,TTATC,TTATC-2-10	4099	3330	1541	2033	4049	5139	3360	4305	2649	3073	1875	3161	2301	2691
ATCGAAAGGATGGGAGTACTAAGCTTCTCAGCACTGTTTGCGTATGGGAGTTATCAAAATGGTCTTATCATTTGAGCATGTTTGCTGACTTTGTTTATCAACAGTGTCTTATCCCAAGACGTTTAGTCAGCACGGACAAAGTACTGAGAT	TCTCAGCACTGTTTGCGTATGGGAGTTATCAAAATGGTCTTATCATTTGAGCATGTTTGCTGACTTTGTTTATCAACAGTGTCTTATCCCAAGACGTTTA	cat3		N	TGTTTGC,TTATC,TTATC-2-9	1937	1846	1234	1871	4108	4311	3551	2855	2316	2296	1752	4493	1596	1850
ATCGAAAGGATGGGAGTACTAAGCTTCTTATCAGCAAACATGTTTACGCTTATCGGCAAACATGTTTACACTTATCCGCAAACACGTTTACTCTTATCCGCAAACATGTTTACCCAAGACGTTTAGTCAGCACGGACAAAGTACTGAGAT	TCTTATCAGCAAACATGTTTACGCTTATCGGCAAACATGTTTACACTTATCCGCAAACACGTTTACTCTTATCCGCAAACATGTTTACCCAAGACGTTTA	cat3		N	CTTATC,GCAAACA,GTTTAC-4-1	1080	481	480	477	2816	2555	1004	1011	814	597	731	606	1424	1248
ATCGAAAGGATGGGAGTACTAAGCTTGCAAACACGTTTACTGCAAATAAGCAAACAAGTTTACCGCAAATATGCAAACAGGTTTACGGCAAATACGCAAACAAGTTTACTGCAAATAGACGTTTAGTCAGCACGGACAAAGTACTGAGAT	TGCAAACACGTTTACTGCAAATAAGCAAACAAGTTTACCGCAAATATGCAAACAGGTTTACGGCAAATACGCAAACAAGTTTACTGCAAATAGACGTTTA	cat3		N	GCAAACA,GTTTAC,GCAAATA-4-1	555	296	552	833	678	467	62	425	493	652	799	1532	428	290
ATCGAAAGGATGGGAGTACTAAGCTTCTCAGCAGCAAACATGTATGGGGCAAACAAAAATGGTGCAAATATTTGAGCAGCAAACATGACTTTGGCAAACAACAGTGTCGCAAATAAAGACGTTTAGTCAGCACGGACAAAGTACTGAGAT	TCTCAGCAGCAAACATGTATGGGGCAAACAAAAATGGTGCAAATATTTGAGCAGCAAACATGACTTTGGCAAACAACAGTGTCGCAAATAAAGACGTTTA	cat3		N	GCAAACA,GCAAACA,GCAAATA-2-8	587	237	96	12	976	1158	1511	1122	286	377	153	1	638	512
ATCGAAAGGATGGGAGTACTAAGCTTGATAAGACTTATCGGCAAATAGGATAAGGCTTATCGGCAAATAAGATAAGCCTTATCCGCAAATATGATAAGCCTTATCGGCAAATACCAAGACGTTTAGTCAGCACGGACAAAGTACTGAGAT	TGATAAGACTTATCGGCAAATAGGATAAGGCTTATCGGCAAATAAGATAAGCCTTATCCGCAAATATGATAAGCCTTATCGGCAAATACCAAGACGTTTA	cat3		N	GATAAG,CTTATC,GCAAATA-4-1	718	359	261	112	1253	1757	501	712	441	430	306	372	928	696
ATCGAAAGGATGGGAGTACTAAGCTTCTCAGCACCATTTGTGTATTGTTTGCAGGAAAATGGTCACTGAATTGTTTACGGTAGCCTGACTTTGTCCTTGCAAATAGTCTTTCCCCAAGACGTTTAGTCAGCACGGACAAAGTACTGAGAT	TCTCAGCACCATTTGTGTATTGTTTGCAGGAAAATGGTCACTGAATTGTTTACGGTAGCCTGACTTTGTCCTTGCAAATAGTCTTTCCCCAAGACGTTTA	cat3		N	TGTTTGC,GTTTAC,GCAAATA-1-20	3381	2278	2309	2531	4101	4449	2407	2929	3596	3080	3660	2760	2862	3120
ATCGAAAGGATGGGAGTACTAAGCTTTGTTTGCCTGTTTGCGGCAAACAGTGTTTGCATGTTTGCCGCAAACAGTGTTTGCATGTTTGCTGCAAACATTGTTTGCGTGTTTGCCGCAAACATTTAGTCAGCACGGACAAAGTACTGAGAT	TTGTTTGCCTGTTTGCGGCAAACAGTGTTTGCATGTTTGCCGCAAACAGTGTTTGCATGTTTGCTGCAAACATTGTTTGCGTGTTTGCCGCAAACATTTA	cat3		N	TGTTTGC,TGTTTGC,GCAAACA-4-1	2303	1774	1293	3107	2224	2986	594	766	709	903	4057	3058	296	363
ATCGAAAGGATGGGAGTACTAAGCTTCTCAGCACCATTTGTGTATATTTACTAGGAAAATGGTCACTGAAGCAAATAAGGTAGCCTGACTTTGTCCGCAAATAGTGTCTTTCCCCAAGACGTTTAGTCAGCACGGACAAAGTACTGAGAT	TCTCAGCACCATTTGTGTATATTTACTAGGAAAATGGTCACTGAAGCAAATAAGGTAGCCTGACTTTGTCCGCAAATAGTGTCTTTCCCCAAGACGTTTA	cat3		N	TATTTAC,GCAAATA,GCAAATA-1-19	2313	1652	1492	1922	1264	1786	718	1994	1977	1675	1827	2897	643	734
ATCGAAAGGATGGGAGTACTAAGCTTCTCAGCACCATTTGTGTATGATAAGTAGGAAAATGGTCACTGAATTATTTACGGTAGCCTGACTTTGTCCTTTTATCGTGTCTTTCCCCAAGACGTTTAGTCAGCACGGACAAAGTACTGAGAT	TCTCAGCACCATTTGTGTATGATAAGTAGGAAAATGGTCACTGAATTATTTACGGTAGCCTGACTTTGTCCTTTTATCGTGTCTTTCCCCAAGACGTTTA	cat3		N	GATAAG,TATTTAC,TTATC-1-20	3051	2099	2285	2876	3136	3157	2208	2250	2390	2306	2766	3574	1973	1648
ATCGAAAGGATGGGAGTACTAAGCTTAGATAAATTATCTGTATTTACGAGATAAGTTATCTGTATTTACAAGATAACTTATCTCTATTTACTAGATAACTTATCTGTATTTACCCAAGACGTTTAGTCAGCACGGACAAAGTACTGAGAT	TAGATAAATTATCTGTATTTACGAGATAAGTTATCTGTATTTACAAGATAACTTATCTCTATTTACTAGATAACTTATCTGTATTTACCCAAGACGTTTA	cat3		N	AGATAA,TTATCT,TATTTAC-4-1	503	2	0	0	0	381	9	233	196	97	533	2193	123	178
ATCGAAAGGATGGGAGTACTAAGCTTTTATCTATTATCTGGCAAACAGTTATCTGTTATCTGGCAAACAATTATCTCTTATCTCGCAAACATTTATCTCTTATCTGGCAAACACCAAGACGTTTAGTCAGCACGGACAAAGTACTGAGAT	TTTATCTATTATCTGGCAAACAGTTATCTGTTATCTGGCAAACAATTATCTCTTATCTCGCAAACATTTATCTCTTATCTGGCAAACACCAAGACGTTTA	cat3		N	TTATCT,TTATCT,GCAAACA-4-1	762	468	1105	1008	1113	1261	423	1141	464	707	4192	1943	212	218
ATCGAAAGGATGGGAGTACTAAGCTTCAGATAACCTTATCTGTTTATCAGAGATAAAATTATCTACTTATCTTAGATAAGTTTATCTACTTATCCCAGATAAAGTTATCTTCTTATCGACGTTTAGTCAGCACGGACAAAGTACTGAGAT	TCAGATAACCTTATCTGTTTATCAGAGATAAAATTATCTACTTATCTTAGATAAGTTTATCTACTTATCCCAGATAAAGTTATCTTCTTATCGACGTTTA	cat3		N	AGATAA,TTATCT,TTATC-4-2	1181	0	2	1	13	727	111	522	367	257	747	1186	571	618
ATCGAAAGGATGGGAGTACTAAGCTTCGATAAGCCGTTTACGTTTATCAGGATAAGAAGTTTACACTTATCTTGATAAGGTGTTTACACTTATCCCGATAAGAGGTTTACTCTTATCGACGTTTAGTCAGCACGGACAAAGTACTGAGAT	TCGATAAGCCGTTTACGTTTATCAGGATAAGAAGTTTACACTTATCTTGATAAGGTGTTTACACTTATCCCGATAAGAGGTTTACTCTTATCGACGTTTA	cat3		N	GATAAG,GTTTAC,TTATC-4-2	3252	2038	1809	1714	3222	3628	1826	2430	2612	2172	3076	2349	1766	2198
ATCGAAAGGATGGGAGTACTAAGCTTGATAAGAAGATAAGGCAAATAGGATAAGGAGATAAGGCAAATAAGATAAGCAGATAACGCAAATATGATAAGCAGATAAGGCAAATACCAAGACGTTTAGTCAGCACGGACAAAGTACTGAGAT	TGATAAGAAGATAAGGCAAATAGGATAAGGAGATAAGGCAAATAAGATAAGCAGATAACGCAAATATGATAAGCAGATAAGGCAAATACCAAGACGTTTA	cat3		N	GATAAG,AGATAA,GCAAATA-4-1	1894	1063	1484	1318	362	391	278	186	1050	805	2182	1664	218	290
ATCGAAAGGATGGGAGTACTAAGCTTCTCAGCACCATTTGTGTATCTTATCTAGGAAAATGGTCACTGAATGCAAACAGGTAGCCTGACTTTGTCCTTGCAAACAGTCTTTCCCCAAGACGTTTAGTCAGCACGGACAAAGTACTGAGAT	TCTCAGCACCATTTGTGTATCTTATCTAGGAAAATGGTCACTGAATGCAAACAGGTAGCCTGACTTTGTCCTTGCAAACAGTCTTTCCCCAAGACGTTTA	cat3		N	CTTATC,GCAAACA,GCAAACA-1-20	2160	1730	1033	2388	3014	3374	1794	3139	1616	1557	2129	2871	2011	2075
ATCGAAAGGATGGGAGTACTAAGCTTCAGATAACCAGATAAGTTTATCAGAGATAAAAAGATAAACTTATCTTAGATAAGTAGATAAACTTATCCCAGATAAAGAGATAATCTTATCGACGTTTAGTCAGCACGGACAAAGTACTGAGAT	TCAGATAACCAGATAAGTTTATCAGAGATAAAAAGATAAACTTATCTTAGATAAGTAGATAAACTTATCCCAGATAAAGAGATAATCTTATCGACGTTTA	cat3		N	AGATAA,AGATAA,TTATC-4-2	19	0	0	0	9	162	25	125	0	36	0	0	272	183
ATCGAAAGGATGGGAGTACTAAGCTTCCTTATCCCTGTTTGCTATTATCGACTTATCAATGTTTGCTGTTATCGACTTATCAGTGTTTGCTTTTATCTCCTTATCGTTGTTTGCCATTATCTTTAGTCAGCACGGACAAAGTACTGAGAT	TCCTTATCCCTGTTTGCTATTATCGACTTATCAATGTTTGCTGTTATCGACTTATCAGTGTTTGCTTTTATCTCCTTATCGTTGTTTGCCATTATCTTTA	cat3		N	CTTATC,TGTTTGC,TTATC-4-2	6905	5026	4453	6170	5700	5631	2830	4945	6326	6008	7649	11548	3906	4163
ATCGAAAGGATGGGAGTACTAAGCTTAGATAAATATTTACTGCAAATAAAGATAAATATTTACCGCAAATATAGATAAGTATTTACGGCAAATACAGATAACTATTTACTGCAAATAGACGTTTAGTCAGCACGGACAAAGTACTGAGAT	TAGATAAATATTTACTGCAAATAAAGATAAATATTTACCGCAAATATAGATAAGTATTTACGGCAAATACAGATAACTATTTACTGCAAATAGACGTTTA	cat3		N	AGATAA,TATTTAC,GCAAATA-4-1	96	0	0	0	1	30	0	5	92	48	105	282	3	16
ATCGAAAGGATGGGAGTACTAAGCTTCTTATCAGCAAACATGCAAACAACTTATCAGCAAACACGCAAACATCTTATCGGCAAACAGGCAAACACCTTATCCGCAAACATGCAAACAGACGTTTAGTCAGCACGGACAAAGTACTGAGAT	TCTTATCAGCAAACATGCAAACAACTTATCAGCAAACACGCAAACATCTTATCGGCAAACAGGCAAACACCTTATCCGCAAACATGCAAACAGACGTTTA	cat3		N	CTTATC,GCAAACA,GCAAACA-4-1	416	238	193	172	771	673	350	334	476	353	537	626	498	515
ATCGAAAGGATGGGAGTACTAAGCTTCTCAGCATATTTACTGTATGGGGTTTACGAAAATGGGCAAATAATTTGAGCTATTTACCTGACTTTGTTTACCAACAGTGGCAAATACCAAGACGTTTAGTCAGCACGGACAAAGTACTGAGAT	TCTCAGCATATTTACTGTATGGGGTTTACGAAAATGGGCAAATAATTTGAGCTATTTACCTGACTTTGTTTACCAACAGTGGCAAATACCAAGACGTTTA	cat3		N	TATTTAC,GTTTAC,GCAAATA-2-8	1952	1378	1483	1594	3007	3322	1618	2808	1646	1084	2935	2645	1186	1295
ATCGAAAGGATGGGAGTACTAAGCTTCTCAGCATGTTTGCTGTATGGGGCAAACAAAAATGGTGTTTACATTTGAGCTGTTTGCCTGACTTTGCAAACAAACAGTGTGTTTACCCAAGACGTTTAGTCAGCACGGACAAAGTACTGAGAT	TCTCAGCATGTTTGCTGTATGGGGCAAACAAAAATGGTGTTTACATTTGAGCTGTTTGCCTGACTTTGCAAACAAACAGTGTGTTTACCCAAGACGTTTA	cat3		N	TGTTTGC,GCAAACA,GTTTAC-2-8	2019	1614	997	1264	2766	3335	2315	2817	2068	2115	3682	3155	1710	2327
ATCGAAAGGATGGGAGTACTAAGCTTTGTTTGCCGCAAACAGTATTTACGTGTTTGCAGCAAACACTATTTACGTGTTTGCAGCAAACATTATTTACTTGTTTGCGGCAAACACTATTTACTTTAGTCAGCACGGACAAAGTACTGAGAT	TTGTTTGCCGCAAACAGTATTTACGTGTTTGCAGCAAACACTATTTACGTGTTTGCAGCAAACATTATTTACTTGTTTGCGGCAAACACTATTTACTTTA	cat3		N	TGTTTGC,GCAAACA,TATTTAC-4-1	1235	911	878	1831	744	1228	355	281	211	607	1516	3933	227	206
ATCGAAAGGATGGGAGTACTAAGCTTCTCAGCACAGATAATGTATGGGATTATCGAAAATGGTTTATCAATTTGAGCAGATAACCTGACTTTTTATCTCAACAGTGTTATCCCCCAAGACGTTTAGTCAGCACGGACAAAGTACTGAGAT	TCTCAGCACAGATAATGTATGGGATTATCGAAAATGGTTTATCAATTTGAGCAGATAACCTGACTTTTTATCTCAACAGTGTTATCCCCCAAGACGTTTA	cat3		N	AGATAA,TTATC,TTATC-2-9	1893	1263	877	1872	2526	2577	1387	2673	1762	1393	1506	2691	1194	1340
ATCGAAAGGATGGGAGTACTAAGCTTCTCAGCACCATTTGTGTATTTATCTTAGGAAAATGGTCACTGAATTGTTTGCGGTAGCCTGACTTTGTCCTTTATTTACGTCTTTCCCCAAGACGTTTAGTCAGCACGGACAAAGTACTGAGAT	TCTCAGCACCATTTGTGTATTTATCTTAGGAAAATGGTCACTGAATTGTTTGCGGTAGCCTGACTTTGTCCTTTATTTACGTCTTTCCCCAAGACGTTTA	cat3		N	TTATCT,TGTTTGC,TATTTAC-1-20	2696	1881	1764	2355	3306	3173	1727	2925	2373	2353	2918	1792	1788	1940
ATCGAAAGGATGGGAGTACTAAGCTTCTCAGCACCATTTGTGTATTTATCTTAGGAAAATGGTCACTGAATGCAAACAGGTAGCCTGACTTTGTCCTTGTTTACTGTCTTTCCCCAAGACGTTTAGTCAGCACGGACAAAGTACTGAGAT	TCTCAGCACCATTTGTGTATTTATCTTAGGAAAATGGTCACTGAATGCAAACAGGTAGCCTGACTTTGTCCTTGTTTACTGTCTTTCCCCAAGACGTTTA	cat3		N	TTATCT,GCAAACA,GTTTAC-1-20	3538	2587	2225	2275	2637	3578	1798	2594	4408	3430	5435	2960	1639	1978
ATCGAAAGGATGGGAGTACTAAGCTTAGATAAAAGATAAGGCAAACAGAGATAAGAGATAAGGCAAACAAAGATAACAGATAACGCAAACATAGATAACAGATAAGGCAAACACCAAGACGTTTAGTCAGCACGGACAAAGTACTGAGAT	TAGATAAAAGATAAGGCAAACAGAGATAAGAGATAAGGCAAACAAAGATAACAGATAACGCAAACATAGATAACAGATAAGGCAAACACCAAGACGTTTA	cat3		N	AGATAA,AGATAA,GCAAACA-4-1	149	195	153	108	92	227	31	170	263	94	230	97	129	97
ATCGAAAGGATGGGAGTACTAAGCTTCTCAGCACCATTTGTGTATGATAAGTAGGAAAATGGTCACTGAATGCAAACAGGTAGCCTGACTTTGTCCTTGCAAATAGTCTTTCCCCAAGACGTTTAGTCAGCACGGACAAAGTACTGAGAT	TCTCAGCACCATTTGTGTATGATAAGTAGGAAAATGGTCACTGAATGCAAACAGGTAGCCTGACTTTGTCCTTGCAAATAGTCTTTCCCCAAGACGTTTA	cat3		N	GATAAG,GCAAACA,GCAAATA-1-20	2149	1605	774	1453	1921	2746	1301	1561	1664	1349	1043	3427	1148	1195
ATCGAAAGGATGGGAGTACTAAGCTTCTCAGCACCATTTGTGTATAGATAATAGGAAAATGGTCACTGAATTTATCCAGGTAGCCTGACTTTGTCCGCAAATAGTGTCTTTCCCCAAGACGTTTAGTCAGCACGGACAAAGTACTGAGAT	TCTCAGCACCATTTGTGTATAGATAATAGGAAAATGGTCACTGAATTTATCCAGGTAGCCTGACTTTGTCCGCAAATAGTGTCTTTCCCCAAGACGTTTA	cat3		N	AGATAA,TTATC,GCAAATA-1-20	711	472	383	278	1499	1733	1032	1936	284	455	409	230	786	1202
ATCGAAAGGATGGGAGTACTAAGCTTCTCAGCACTTATCGTGTATGGCTTATCGGAAAATGGCAAATAAATTTGAGCTTATCGCCTGACTCTTATCTTCAACAGGCAAATACCCCAAGACGTTTAGTCAGCACGGACAAAGTACTGAGAT	TCTCAGCACTTATCGTGTATGGCTTATCGGAAAATGGCAAATAAATTTGAGCTTATCGCCTGACTCTTATCTTCAACAGGCAAATACCCCAAGACGTTTA	cat3		N	CTTATC,CTTATC,GCAAATA-2-8	2572	1826	1049	2159	3340	3742	2786	4004	2155	1526	2426	4236	2308	2288
ATCGAAAGGATGGGAGTACTAAGCTTCTCAGCATTATCTGTGTATGGGCAAACAGAAAATGGTATTTACATTTGAGCTTATCTCCTGACTTGCAAACACAACAGTGTATTTACCCAAGACGTTTAGTCAGCACGGACAAAGTACTGAGAT	TCTCAGCATTATCTGTGTATGGGCAAACAGAAAATGGTATTTACATTTGAGCTTATCTCCTGACTTGCAAACACAACAGTGTATTTACCCAAGACGTTTA	cat3		N	TTATCT,GCAAACA,TATTTAC-2-8	2175	1562	1510	2212	2703	2681	1122	1159	2519	2452	2167	5509	1389	1216
ATCGAAAGGATGGGAGTACTAAGCTTCTCAGCACCATTTGTGTATTGTTTGCAGGAAAATGGTCACTGAATTTTATCAGGTAGCCTGACTTTGTCCTGCAAATATGTCTTTCCCCAAGACGTTTAGTCAGCACGGACAAAGTACTGAGAT	TCTCAGCACCATTTGTGTATTGTTTGCAGGAAAATGGTCACTGAATTTTATCAGGTAGCCTGACTTTGTCCTGCAAATATGTCTTTCCCCAAGACGTTTA	cat3		N	TGTTTGC,TTATC,GCAAATA-1-20	2346	1851	1852	3572	2586	3122	2694	4153	3587	3582	4002	5215	2277	2668
ATCGAAAGGATGGGAGTACTAAGCTTCTCAGCACCATTTGTGTATTATTTACAGGAAAATGGTCACTGAATTTATTTACGTAGCCTGACTTTGTCCTTCTTATCTGTCTTTCCCCAAGACGTTTAGTCAGCACGGACAAAGTACTGAGAT	TCTCAGCACCATTTGTGTATTATTTACAGGAAAATGGTCACTGAATTTATTTACGTAGCCTGACTTTGTCCTTCTTATCTGTCTTTCCCCAAGACGTTTA	cat3		N	TATTTAC,TATTTAC,TTATC-1-20	3353	2204	1812	3305	3519	4194	2084	3014	2721	2208	2717	3477	2466	2284
ATCGAAAGGATGGGAGTACTAAGCTTCTCAGCACTTATCGTGTATGGAGATAAGGAAAATGTGTTTGCAATTTGAGCTTATCGCCTGACTAGATAATTCAACAGTGTTTGCCCCCAAGACGTTTAGTCAGCACGGACAAAGTACTGAGAT	TCTCAGCACTTATCGTGTATGGAGATAAGGAAAATGTGTTTGCAATTTGAGCTTATCGCCTGACTAGATAATTCAACAGTGTTTGCCCCCAAGACGTTTA	cat3		N	CTTATC,AGATAA,TGTTTGC-2-8	2012	1243	1454	1993	2448	2406	1201	2102	1370	1776	2164	3024	1074	1223
ATCGAAAGGATGGGAGTACTAAGCTTCTCAGCATGTTTGCTGTATGGGTATTTACAAAATGGTTATTTACTTTGAGCATGTTTGCTGACTTTGTATTTACACAGTGTCTATTTACAAGACGTTTAGTCAGCACGGACAAAGTACTGAGAT	TCTCAGCATGTTTGCTGTATGGGTATTTACAAAATGGTTATTTACTTTGAGCATGTTTGCTGACTTTGTATTTACACAGTGTCTATTTACAAGACGTTTA	cat3		N	TGTTTGC,TATTTAC,TATTTAC-2-8	2369	1469	2243	2274	1624	1564	975	1189	2427	2483	4207	4997	941	1218
ATCGAAAGGATGGGAGTACTAAGCTTCTCAGCAAGATAAGTGTATGGTTATCTGGAAAATGGCAAACAAATTTGAGAGATAAGCCTGACTTTATCTTTCAACAGGCAAACACCCCAAGACGTTTAGTCAGCACGGACAAAGTACTGAGAT	TCTCAGCAAGATAAGTGTATGGTTATCTGGAAAATGGCAAACAAATTTGAGAGATAAGCCTGACTTTATCTTTCAACAGGCAAACACCCCAAGACGTTTA	cat3		N	AGATAA,TTATCT,GCAAACA-2-8	533	433	759	490	1931	2140	984	959	689	744	1133	647	1067	882
ATCGAAAGGATGGGAGTACTAAGCTTCTCAGCACCATTTGTGTATTGTTTGCAGGAAAATGGTCACTGAATTGCAAACAGTAGCCTGACTTTGTCCTTCTTATCTGTCTTTCCCCAAGACGTTTAGTCAGCACGGACAAAGTACTGAGAT	TCTCAGCACCATTTGTGTATTGTTTGCAGGAAAATGGTCACTGAATTGCAAACAGTAGCCTGACTTTGTCCTTCTTATCTGTCTTTCCCCAAGACGTTTA	cat3		N	TGTTTGC,GCAAACA,TTATC-1-20	2597	1705	836	1585	3398	3787	3418	5287	2682	2449	2034	2021	2443	2784
ATCGAAAGGATGGGAGTACTAAGCTTCTCAGCAAGATAAGTGTATGGTGTTTGCGAAAATGGTGTTTGCATTTGAGCAGATAACCTGACTTTGTTTGCCAACAGTGTGTTTGCCCAAGACGTTTAGTCAGCACGGACAAAGTACTGAGAT	TCTCAGCAAGATAAGTGTATGGTGTTTGCGAAAATGGTGTTTGCATTTGAGCAGATAACCTGACTTTGTTTGCCAACAGTGTGTTTGCCCAAGACGTTTA	cat3		N	AGATAA,TGTTTGC,TGTTTGC-2-8	1373	954	864	1529	3229	3571	2081	2846	1200	807	2334	2760	1937	1985
ATCGAAAGGATGGGAGTACTAAGCTTCTCAGCACCATTTGTGTATCTTATCTAGGAAAATGGTCACTGAATAGATAAAGGTAGCCTGACTTTGTCCTTTATCAGTGTCTTTCCCCAAGACGTTTAGTCAGCACGGACAAAGTACTGAGAT	TCTCAGCACCATTTGTGTATCTTATCTAGGAAAATGGTCACTGAATAGATAAAGGTAGCCTGACTTTGTCCTTTATCAGTGTCTTTCCCCAAGACGTTTA	cat3		N	CTTATC,AGATAA,TTATC-1-20	2540	1384	561	1312	4045	4176	3528	4975	2197	1990	699	2549	3114	2799
ATCGAAAGGATGGGAGTACTAAGCTTCTCAGCACTTATCTTGTATGGGATGTTTGCAAATGGTCATTATCTTTGAGCAGTTATCTTGACTTTGTTGTTTGCCAGTGTCTTTTATCAAGACGTTTAGTCAGCACGGACAAAGTACTGAGAT	TCTCAGCACTTATCTTGTATGGGATGTTTGCAAATGGTCATTATCTTTGAGCAGTTATCTTGACTTTGTTGTTTGCCAGTGTCTTTTATCAAGACGTTTA	cat3		N	TTATCT,TGTTTGC,TTATC-2-9	2251	1694	1093	1841	3036	3352	2694	4117	1995	2185	1810	3661	1765	2212
ATCGAAAGGATGGGAGTACTAAGCTTCTTATCACTTATCGTGTTTGCGCTTATCGCTTATCGTGTTTGCACTTATCCCTTATCCTGTTTGCTCTTATCCCTTATCGTGTTTGCCCAAGACGTTTAGTCAGCACGGACAAAGTACTGAGAT	TCTTATCACTTATCGTGTTTGCGCTTATCGCTTATCGTGTTTGCACTTATCCCTTATCCTGTTTGCTCTTATCCCTTATCGTGTTTGCCCAAGACGTTTA	cat3		N	CTTATC,CTTATC,TGTTTGC-4-1	3354	2222	1576	3535	5053	6299	3248	4649	3441	2880	3068	4500	2334	2649
ATCGAAAGGATGGGAGTACTAAGCTTCTCAGCACTTATCGTGTATGGTTATCTGGAAAATGTGTTTGCAATTTGAGCTTATCGCCTGACTTTATCTTTCAACAGTGTTTGCCCCCAAGACGTTTAGTCAGCACGGACAAAGTACTGAGAT	TCTCAGCACTTATCGTGTATGGTTATCTGGAAAATGTGTTTGCAATTTGAGCTTATCGCCTGACTTTATCTTTCAACAGTGTTTGCCCCCAAGACGTTTA	cat3		N	CTTATC,TTATCT,TGTTTGC-2-8	4231	3287	2191	3644	3557	3939	1311	2187	3875	3451	3964	5233	2176	1968
ATCGAAAGGATGGGAGTACTAAGCTTCTCAGCACCATTTGTGTATTTATCTTAGGAAAATGGTCACTGAATTGTTTGCGGTAGCCTGACTTTGTCCTTTTATCGTGTCTTTCCCCAAGACGTTTAGTCAGCACGGACAAAGTACTGAGAT	TCTCAGCACCATTTGTGTATTTATCTTAGGAAAATGGTCACTGAATTGTTTGCGGTAGCCTGACTTTGTCCTTTTATCGTGTCTTTCCCCAAGACGTTTA	cat3		N	TTATCT,TGTTTGC,TTATC-1-20	2384	2055	2219	2534	2831	3572	2000	2269	2621	2288	3457	3351	1621	1804
ATCGAAAGGATGGGAGTACTAAGCTTCGATAAGCCTGTTTGCTATTATCGAGATAAGAATGTTTGCTGTTATCGAGATAAGAGTGTTTGCTTTTATCTCGATAAGGTTGTTTGCCATTATCTTTAGTCAGCACGGACAAAGTACTGAGAT	TCGATAAGCCTGTTTGCTATTATCGAGATAAGAATGTTTGCTGTTATCGAGATAAGAGTGTTTGCTTTTATCTCGATAAGGTTGTTTGCCATTATCTTTA	cat3		N	GATAAG,TGTTTGC,TTATC-4-2	2593	1984	2155	1683	2141	1887	1569	1823	2721	2159	3098	3425	1070	1321
ATCGAAAGGATGGGAGTACTAAGCTTCTCAGCACCATTTGTGTATGATAAGTAGGAAAATGGTCACTGAATGATAAGAGGTAGCCTGACTTTGTCCTGTTTACGTGTCTTTCCCCAAGACGTTTAGTCAGCACGGACAAAGTACTGAGAT	TCTCAGCACCATTTGTGTATGATAAGTAGGAAAATGGTCACTGAATGATAAGAGGTAGCCTGACTTTGTCCTGTTTACGTGTCTTTCCCCAAGACGTTTA	cat3		N	GATAAG,GATAAG,GTTTAC-1-20	1523	1003	484	1151	3497	4449	3001	3534	1359	1380	1589	1703	2149	2325
ATCGAAAGGATGGGAGTACTAAGCTTCTCAGCACCATTTGTGTATGCAAACAAGGAAAATGGTCACTGAATTGTTTACGGTAGCCTGACTTTGTCCTTTTATCGTGTCTTTCCCCAAGACGTTTAGTCAGCACGGACAAAGTACTGAGAT	TCTCAGCACCATTTGTGTATGCAAACAAGGAAAATGGTCACTGAATTGTTTACGGTAGCCTGACTTTGTCCTTTTATCGTGTCTTTCCCCAAGACGTTTA	cat3		N	GCAAACA,GTTTAC,TTATC-1-20	4179	3496	4070	6494	2919	3585	2047	2777	6733	5665	8733	10313	3511	3153
ATCGAAAGGATGGGAGTACTAAGCTTTGTTTGCCTGTTTGCGTTATCGTGTTTGCATGTTTGCCTTATCATGTTTGCATGTTTGCTTTATCTTGTTTGCATGTTTGCCTTATCCCAAGACGTTTAGTCAGCACGGACAAAGTACTGAGAT	TTGTTTGCCTGTTTGCGTTATCGTGTTTGCATGTTTGCCTTATCATGTTTGCATGTTTGCTTTATCTTGTTTGCATGTTTGCCTTATCCCAAGACGTTTA	cat3		N	TGTTTGC,TGTTTGC,TTATC-4-1	2973	2159	1777	2348	5090	5785	2510	3699	3024	3294	4072	3967	2503	3106
ATCGAAAGGATGGGAGTACTAAGCTTGATAAGAAGATAAGGCAAACAGGATAAGGAGATAAGGCAAACAAGATAAGCAGATAACGCAAACATGATAAGCAGATAAGGCAAACACCAAGACGTTTAGTCAGCACGGACAAAGTACTGAGAT	TGATAAGAAGATAAGGCAAACAGGATAAGGAGATAAGGCAAACAAGATAAGCAGATAACGCAAACATGATAAGCAGATAAGGCAAACACCAAGACGTTTA	cat3		N	GATAAG,AGATAA,GCAAACA-4-1	1920	1304	2150	2783	613	663	1374	1409	1000	1067	3571	3955	489	397
ATCGAAAGGATGGGAGTACTAAGCTTCTCAGCACCATTTGTGTATTTATCTTAGGAAAATGGTCACTGAATGCAAATAGGTAGCCTGACTTTGTCCTTGCAAATAGTCTTTCCCCAAGACGTTTAGTCAGCACGGACAAAGTACTGAGAT	TCTCAGCACCATTTGTGTATTTATCTTAGGAAAATGGTCACTGAATGCAAATAGGTAGCCTGACTTTGTCCTTGCAAATAGTCTTTCCCCAAGACGTTTA	cat3		N	TTATCT,GCAAATA,GCAAATA-1-20	666	504	743	363	2484	2992	1620	2522	701	582	1111	285	1805	1856
ATCGAAAGGATGGGAGTACTAAGCTTCTCAGCACAGATAATGTATGGGATGTTTGCAAATGGTCATTATCTTTGAGCAGAGATAATGACTTTGTTGTTTGCCAGTGTCTTTTATCAAGACGTTTAGTCAGCACGGACAAAGTACTGAGAT	TCTCAGCACAGATAATGTATGGGATGTTTGCAAATGGTCATTATCTTTGAGCAGAGATAATGACTTTGTTGTTTGCCAGTGTCTTTTATCAAGACGTTTA	cat3		N	AGATAA,TGTTTGC,TTATC-2-9	985	1068	475	768	3580	3952	2369	2683	981	1453	843	1189	3229	3052
ATCGAAAGGATGGGAGTACTAAGCTTCGATAAGCCTTATCTGTTTATCAGGATAAGAATTATCTACTTATCTTGATAAGGTTTATCTACTTATCCCGATAAGAGTTATCTTCTTATCGACGTTTAGTCAGCACGGACAAAGTACTGAGAT	TCGATAAGCCTTATCTGTTTATCAGGATAAGAATTATCTACTTATCTTGATAAGGTTTATCTACTTATCCCGATAAGAGTTATCTTCTTATCGACGTTTA	cat3		N	GATAAG,TTATCT,TTATC-4-2	1496	702	1626	1656	2418	3020	731	1017	1491	850	3051	2769	1453	1315
ATCGAAAGGATGGGAGTACTAAGCTTTATTTACCTATTTACGTTATCGTATTTACATATTTACCTTATCATATTTACATATTTACTTTATCTTATTTACATATTTACCTTATCCCAAGACGTTTAGTCAGCACGGACAAAGTACTGAGAT	TTATTTACCTATTTACGTTATCGTATTTACATATTTACCTTATCATATTTACATATTTACTTTATCTTATTTACATATTTACCTTATCCCAAGACGTTTA	cat3		N	TATTTAC,TATTTAC,TTATC-4-1	7	0	0	0	0	0	0	0	0	0	1	1	0	0
ATCGAAAGGATGGGAGTACTAAGCTTAGATAAAGCAAACATGCAAACAAAGATAAAGCAAACACGCAAACATAGATAAGGCAAACAGGCAAACACAGATAACGCAAACATGCAAACAGACGTTTAGTCAGCACGGACAAAGTACTGAGAT	TAGATAAAGCAAACATGCAAACAAAGATAAAGCAAACACGCAAACATAGATAAGGCAAACAGGCAAACACAGATAACGCAAACATGCAAACAGACGTTTA	cat3		N	AGATAA,GCAAACA,GCAAACA-4-1	61	90	0	7	536	529	197	358	134	88	0	2	225	279
ATCGAAAGGATGGGAGTACTAAGCTTGATAAGAGATAAGGGCAAACAGGATAAGGGATAAGGGCAAACAAGATAAGCGATAAGCGCAAACATGATAAGCGATAAGGGCAAACACCAAGACGTTTAGTCAGCACGGACAAAGTACTGAGAT	TGATAAGAGATAAGGGCAAACAGGATAAGGGATAAGGGCAAACAAGATAAGCGATAAGCGCAAACATGATAAGCGATAAGGGCAAACACCAAGACGTTTA	cat3		N	GATAAG,GATAAG,GCAAACA-4-1	150	245	63	70	844	941	1016	1163	91	68	39	63	556	547
ATCGAAAGGATGGGAGTACTAAGCTTCTCAGCACCATTTGTGTATGTTTGCTAGGAAAATGGTCACTGAAGCAAATAAGGTAGCCTGACTTTGTCCGCAAATAGTGTCTTTCCCCAAGACGTTTAGTCAGCACGGACAAAGTACTGAGAT	TCTCAGCACCATTTGTGTATGTTTGCTAGGAAAATGGTCACTGAAGCAAATAAGGTAGCCTGACTTTGTCCGCAAATAGTGTCTTTCCCCAAGACGTTTA	cat3		N	TGTTTGC,GCAAATA,GCAAATA-1-19	1422	1008	2069	2622	2121	2218	1413	1296	1835	1559	3524	3028	1096	1484
ATCGAAAGGATGGGAGTACTAAGCTTCTCAGCACCATTTGTGTATGATAAGTAGGAAAATGGTCACTGAATTGTTTGCGGTAGCCTGACTTTGTCCTTGCAAACAGTCTTTCCCCAAGACGTTTAGTCAGCACGGACAAAGTACTGAGAT	TCTCAGCACCATTTGTGTATGATAAGTAGGAAAATGGTCACTGAATTGTTTGCGGTAGCCTGACTTTGTCCTTGCAAACAGTCTTTCCCCAAGACGTTTA	cat3		N	GATAAG,TGTTTGC,GCAAACA-1-20	1083	633	347	379	3590	4129	3120	3649	534	670	259	232	2167	2878
ATCGAAAGGATGGGAGTACTAAGCTTTGTTTGCCGCAAACAGGTTTACATGTTTGCAGCAAACAAGTTTACTTGTTTGCGGCAAACAAGTTTACCTGTTTGCAGCAAACATGTTTACGACGTTTAGTCAGCACGGACAAAGTACTGAGAT	TTGTTTGCCGCAAACAGGTTTACATGTTTGCAGCAAACAAGTTTACTTGTTTGCGGCAAACAAGTTTACCTGTTTGCAGCAAACATGTTTACGACGTTTA	cat3		N	TGTTTGC,GCAAACA,GTTTAC-4-1	158	259	194	230	773	1453	842	1077	24	165	312	894	134	185
ATCGAAAGGATGGGAGTACTAAGCTTCTTTATCCCATTATCGTATTATCGATTTATCAATTTATCCTGTTATCGAGTTATCAGCTTATCTTTTTATCTCATTATCGTCTTATCCCATTATCTTTAGTCAGCACGGACAAAGTACTGAGAT	TCTTTATCCCATTATCGTATTATCGATTTATCAATTTATCCTGTTATCGAGTTATCAGCTTATCTTTTTATCTCATTATCGTCTTATCCCATTATCTTTA	cat3		N	TTATC,TTATC,TTATC-4-3	4454	2572	2649	3147	4524	4832	2398	3294	3275	3572	6114	5079	1539	1588
ATCGAAAGGATGGGAGTACTAAGCTTCTCAGCAGATAAGGTGTATGGTGTTTGCGAAAATGGGCAAATAATTTGAGCGATAAGCCTGACTTTGTTTGCCAACAGTGGCAAATACCAAGACGTTTAGTCAGCACGGACAAAGTACTGAGAT	TCTCAGCAGATAAGGTGTATGGTGTTTGCGAAAATGGGCAAATAATTTGAGCGATAAGCCTGACTTTGTTTGCCAACAGTGGCAAATACCAAGACGTTTA	cat3		N	GATAAG,TGTTTGC,GCAAATA-2-8	3034	2399	1270	3012	1716	1724	430	1106	2424	2044	2555	4921	950	1164
ATCGAAAGGATGGGAGTACTAAGCTTCTTATCATATTTACTGTTTACGCTTATCGTATTTACTGTTTACACTTATCCTATTTACCGTTTACTCTTATCCTATTTACTGTTTACCCAAGACGTTTAGTCAGCACGGACAAAGTACTGAGAT	TCTTATCATATTTACTGTTTACGCTTATCGTATTTACTGTTTACACTTATCCTATTTACCGTTTACTCTTATCCTATTTACTGTTTACCCAAGACGTTTA	cat3		N	CTTATC,TATTTAC,GTTTAC-4-1	2574	1487	1337	1853	3477	3507	1697	1990	2365	2030	4020	5219	828	1357
ATCGAAAGGATGGGAGTACTAAGCTTGATAAGAGATAAGGTGTTTGCGGATAAGGGATAAGGTGTTTGCAGATAAGCGATAAGCTGTTTGCTGATAAGCGATAAGGTGTTTGCCCAAGACGTTTAGTCAGCACGGACAAAGTACTGAGAT	TGATAAGAGATAAGGTGTTTGCGGATAAGGGATAAGGTGTTTGCAGATAAGCGATAAGCTGTTTGCTGATAAGCGATAAGGTGTTTGCCCAAGACGTTTA	cat3		N	GATAAG,GATAAG,TGTTTGC-4-1	1131	643	956	1016	1088	1200	522	836	795	788	2316	1785	643	715
ATCGAAAGGATGGGAGTACTAAGCTTCTCAGCACCATTTGTGTATCTTATCTAGGAAAATGGTCACTGAATGCAAACAGGTAGCCTGACTTTGTCCTTTATTTACGTCTTTCCCCAAGACGTTTAGTCAGCACGGACAAAGTACTGAGAT	TCTCAGCACCATTTGTGTATCTTATCTAGGAAAATGGTCACTGAATGCAAACAGGTAGCCTGACTTTGTCCTTTATTTACGTCTTTCCCCAAGACGTTTA	cat3		N	CTTATC,GCAAACA,TATTTAC-1-20	2709	1615	2177	2271	3191	3314	1948	2630	2581	1624	3430	3731	1778	1483
ATCGAAAGGATGGGAGTACTAAGCTTCTCAGCACCATTTGTGTATCTTATCTAGGAAAATGGTCACTGAATTGTTTGCGGTAGCCTGACTTTGTCCTTTTATCGTGTCTTTCCCCAAGACGTTTAGTCAGCACGGACAAAGTACTGAGAT	TCTCAGCACCATTTGTGTATCTTATCTAGGAAAATGGTCACTGAATTGTTTGCGGTAGCCTGACTTTGTCCTTTTATCGTGTCTTTCCCCAAGACGTTTA	cat3		N	CTTATC,TGTTTGC,TTATC-1-20	2233	1789	1471	2047	3886	3953	2236	2824	2577	1982	2823	3099	2835	2736
ATCGAAAGGATGGGAGTACTAAGCTTCTCAGCACGATAAGTGTATGGGACTTATCAAAATGGTCTTATCATTTGAGCAGATAAGCTGACTTTGCTTATCAACAGTGTCTTATCCCAAGACGTTTAGTCAGCACGGACAAAGTACTGAGAT	TCTCAGCACGATAAGTGTATGGGACTTATCAAAATGGTCTTATCATTTGAGCAGATAAGCTGACTTTGCTTATCAACAGTGTCTTATCCCAAGACGTTTA	cat3		N	GATAAG,CTTATC,TTATC-2-9	2515	1954	1586	1539	3365	3926	1878	3062	3206	2549	2754	2777	2319	2571
ATCGAAAGGATGGGAGTACTAAGCTTCTCAGCACCATTTGTGTATTTATCTTAGGAAAATGGTCACTGAATTGTTTGCGGTAGCCTGACTTTGTCCTTTGTTTGCGTCTTTCCCCAAGACGTTTAGTCAGCACGGACAAAGTACTGAGAT	TCTCAGCACCATTTGTGTATTTATCTTAGGAAAATGGTCACTGAATTGTTTGCGGTAGCCTGACTTTGTCCTTTGTTTGCGTCTTTCCCCAAGACGTTTA	cat3		N	TTATCT,TGTTTGC,TGTTTGC-1-20	4490	3630	1361	1943	2911	3179	1546	2819	4696	5399	3181	2789	2134	1646
ATCGAAAGGATGGGAGTACTAAGCTTCTCAGCACCATTTGTGTATTGTTTGCAGGAAAATGGTCACTGAATTTTATCAGGTAGCCTGACTTTGTCCTTTATCAGTGTCTTTCCCCAAGACGTTTAGTCAGCACGGACAAAGTACTGAGAT	TCTCAGCACCATTTGTGTATTGTTTGCAGGAAAATGGTCACTGAATTTTATCAGGTAGCCTGACTTTGTCCTTTATCAGTGTCTTTCCCCAAGACGTTTA	cat3		N	TGTTTGC,TTATC,TTATC-1-20	2827	2464	1712	1936	3976	4108	3561	4139	3340	2685	2751	3209	3058	3060
ATCGAAAGGATGGGAGTACTAAGCTTCTCAGCACGATAAGTGTATGGGAAGATAAAAAATGGTCAGATAATTTGAGCAGGATAAGTGACTTTGTAGATAAACAGTGTCTAGATAAAAGACGTTTAGTCAGCACGGACAAAGTACTGAGAT	TCTCAGCACGATAAGTGTATGGGAAGATAAAAAATGGTCAGATAATTTGAGCAGGATAAGTGACTTTGTAGATAAACAGTGTCTAGATAAAAGACGTTTA	cat3		N	GATAAG,AGATAA,AGATAA-2-9	671	444	274	489	654	461	767	656	414	299	424	443	337	208
ATCGAAAGGATGGGAGTACTAAGCTTCTCAGCACCATTTGTGTATCTTATCTAGGAAAATGGTCACTGAATAGATAAAGGTAGCCTGACTTTGTCCTGCAAATATGTCTTTCCCCAAGACGTTTAGTCAGCACGGACAAAGTACTGAGAT	TCTCAGCACCATTTGTGTATCTTATCTAGGAAAATGGTCACTGAATAGATAAAGGTAGCCTGACTTTGTCCTGCAAATATGTCTTTCCCCAAGACGTTTA	cat3		N	CTTATC,AGATAA,GCAAATA-1-20	2679	2180	1039	1586	2530	2914	2340	3169	3597	3270	1970	2129	2123	2573
ATCGAAAGGATGGGAGTACTAAGCTTCTCAGCACGATAAGTGTATGGGAAGATAAAAAATGGTCTTATCATTTGAGCAGATAAGCTGACTTTGAGATAAAACAGTGTCTTATCCCAAGACGTTTAGTCAGCACGGACAAAGTACTGAGAT	TCTCAGCACGATAAGTGTATGGGAAGATAAAAAATGGTCTTATCATTTGAGCAGATAAGCTGACTTTGAGATAAAACAGTGTCTTATCCCAAGACGTTTA	cat3		N	GATAAG,AGATAA,TTATC-2-9	2058	1470	1270	1204	1798	1872	676	1690	1481	1124	2314	1639	1035	1274
ATCGAAAGGATGGGAGTACTAAGCTTCTCAGCACCATTTGTGTATGCTTATCAGGAAAATGGTCACTGAATTTTTATCGGTAGCCTGACTTTGTCCTTCTTATCTGTCTTTCCCCAAGACGTTTAGTCAGCACGGACAAAGTACTGAGAT	TCTCAGCACCATTTGTGTATGCTTATCAGGAAAATGGTCACTGAATTTTTATCGGTAGCCTGACTTTGTCCTTCTTATCTGTCTTTCCCCAAGACGTTTA	cat3		N	CTTATC,TTATC,TTATC-1-21	2295	1857	1948	2662	3318	3643	3180	4562	1918	2332	2300	4463	2511	2567
ATCGAAAGGATGGGAGTACTAAGCTTCTCAGCACCATTTGTGTATTTATCTTAGGAAAATGGTCACTGAATGTTTACAGGTAGCCTGACTTTGTCCTTTATCAGTGTCTTTCCCCAAGACGTTTAGTCAGCACGGACAAAGTACTGAGAT	TCTCAGCACCATTTGTGTATTTATCTTAGGAAAATGGTCACTGAATGTTTACAGGTAGCCTGACTTTGTCCTTTATCAGTGTCTTTCCCCAAGACGTTTA	cat3		N	TTATCT,GTTTAC,TTATC-1-20	2400	1782	780	1329	2573	2579	1254	2583	2158	1386	1611	1894	1502	1474
ATCGAAAGGATGGGAGTACTAAGCTTGATAAGAGCAAACATTATTTACAGATAAGAGCAAACACTATTTACTGATAAGGGCAAACAGTATTTACCGATAAGCGCAAACATTATTTACGACGTTTAGTCAGCACGGACAAAGTACTGAGAT	TGATAAGAGCAAACATTATTTACAGATAAGAGCAAACACTATTTACTGATAAGGGCAAACAGTATTTACCGATAAGCGCAAACATTATTTACGACGTTTA	cat3		N	GATAAG,GCAAACA,TATTTAC-4-1	1954	1189	1568	2086	717	612	319	485	1094	1089	1688	2918	429	355
ATCGAAAGGATGGGAGTACTAAGCTTCTCAGCACCATTTGTGTATGATAAGTAGGAAAATGGTCACTGAATTTATCTAGGTAGCCTGACTTTGTCCTGCAAACATGTCTTTCCCCAAGACGTTTAGTCAGCACGGACAAAGTACTGAGAT	TCTCAGCACCATTTGTGTATGATAAGTAGGAAAATGGTCACTGAATTTATCTAGGTAGCCTGACTTTGTCCTGCAAACATGTCTTTCCCCAAGACGTTTA	cat3		N	GATAAG,TTATCT,GCAAACA-1-20	3314	2214	1172	1317	3150	3543	1297	1990	2316	2274	1675	1446	1241	1389
ATCGAAAGGATGGGAGTACTAAGCTTCTCAGCACTTATCGTGTATGGTGTTTGCGAAAATGGTGTTTGCATTTGAGCCTTATCCCTGACTTTGTTTGCCAACAGTGTGTTTGCCCAAGACGTTTAGTCAGCACGGACAAAGTACTGAGAT	TCTCAGCACTTATCGTGTATGGTGTTTGCGAAAATGGTGTTTGCATTTGAGCCTTATCCCTGACTTTGTTTGCCAACAGTGTGTTTGCCCAAGACGTTTA	cat3		N	CTTATC,TGTTTGC,TGTTTGC-2-8	2797	1940	958	1799	4836	5695	3642	4148	2558	2274	2257	2528	1830	1935
ATCGAAAGGATGGGAGTACTAAGCTTCTCAGCATGTTTGCTGTATGGGTATTTACAAAATGGTGCAAATATTTGAGCATGTTTGCTGACTTTGTATTTACACAGTGTCGCAAATAAAGACGTTTAGTCAGCACGGACAAAGTACTGAGAT	TCTCAGCATGTTTGCTGTATGGGTATTTACAAAATGGTGCAAATATTTGAGCATGTTTGCTGACTTTGTATTTACACAGTGTCGCAAATAAAGACGTTTA	cat3		N	TGTTTGC,TATTTAC,GCAAATA-2-8	382	313	278	1066	1527	1573	1008	1133	420	368	263	1185	877	904
ATCGAAAGGATGGGAGTACTAAGCTTCTCAGCATGTTTGCTGTATGGGGCAAACAAAAATGGTTTATCAATTTGAGTGTTTGCCCTGACTTGCAAACACAACAGTGTTATCCCCCAAGACGTTTAGTCAGCACGGACAAAGTACTGAGAT	TCTCAGCATGTTTGCTGTATGGGGCAAACAAAAATGGTTTATCAATTTGAGTGTTTGCCCTGACTTGCAAACACAACAGTGTTATCCCCCAAGACGTTTA	cat3		N	TGTTTGC,GCAAACA,TTATC-2-8	2416	1446	2312	1967	2745	2707	1993	2015	2543	2242	3887	3652	1271	1461
ATCGAAAGGATGGGAGTACTAAGCTTCTCAGCACCATTTGTGTATCTTATCTAGGAAAATGGTCACTGAATCTTATCAGGTAGCCTGACTTTGTCCTTATTTACTGTCTTTCCCCAAGACGTTTAGTCAGCACGGACAAAGTACTGAGAT	TCTCAGCACCATTTGTGTATCTTATCTAGGAAAATGGTCACTGAATCTTATCAGGTAGCCTGACTTTGTCCTTATTTACTGTCTTTCCCCAAGACGTTTA	cat3		N	CTTATC,CTTATC,TATTTAC-1-20	1462	1116	269	360	4641	5372	4122	4721	1453	1366	838	454	2769	3024
ATCGAAAGGATGGGAGTACTAAGCTTTGTTTGCCTATTTACGTATTTACGTGTTTGCATATTTACCTATTTACGTGTTTGCATATTTACTTATTTACTTGTTTGCGTATTTACCTATTTACTTTAGTCAGCACGGACAAAGTACTGAGAT	TTGTTTGCCTATTTACGTATTTACGTGTTTGCATATTTACCTATTTACGTGTTTGCATATTTACTTATTTACTTGTTTGCGTATTTACCTATTTACTTTA	cat3		N	TGTTTGC,TATTTAC,TATTTAC-4-1	2789	907	1810	2016	2940	3331	1480	2691	2393	2020	4015	3602	1162	1450
ATCGAAAGGATGGGAGTACTAAGCTTGATAAGACTTATCGTGTTTGCGGATAAGGCTTATCGTGTTTGCAGATAAGCCTTATCCTGTTTGCTGATAAGCCTTATCGTGTTTGCCCAAGACGTTTAGTCAGCACGGACAAAGTACTGAGAT	TGATAAGACTTATCGTGTTTGCGGATAAGGCTTATCGTGTTTGCAGATAAGCCTTATCCTGTTTGCTGATAAGCCTTATCGTGTTTGCCCAAGACGTTTA	cat3		N	GATAAG,CTTATC,TGTTTGC-4-1	3300	2121	1590	2449	2042	2304	1320	1572	3346	2677	2474	4057	1389	1488
ATCGAAAGGATGGGAGTACTAAGCTTCTCAGCACCATTTGTGTATTGTTTGCAGGAAAATGGTCACTGAATTGCAAACAGTAGCCTGACTTTGTCCTTCGTTTACGTCTTTCCCCAAGACGTTTAGTCAGCACGGACAAAGTACTGAGAT	TCTCAGCACCATTTGTGTATTGTTTGCAGGAAAATGGTCACTGAATTGCAAACAGTAGCCTGACTTTGTCCTTCGTTTACGTCTTTCCCCAAGACGTTTA	cat3		N	TGTTTGC,GCAAACA,GTTTAC-1-20	5735	3968	3632	4111	4055	4568	1925	4346	5735	5753	6791	6362	3224	3574
ATCGAAAGGATGGGAGTACTAAGCTTCTCAGCACTTATCGTGTATGGTGTTTGCGAAAATGGTATTTACATTTGAGCCTTATCCCTGACTTTGTTTGCCAACAGTGTATTTACCCAAGACGTTTAGTCAGCACGGACAAAGTACTGAGAT	TCTCAGCACTTATCGTGTATGGTGTTTGCGAAAATGGTATTTACATTTGAGCCTTATCCCTGACTTTGTTTGCCAACAGTGTATTTACCCAAGACGTTTA	cat3		N	CTTATC,TGTTTGC,TATTTAC-2-8	2059	1716	1418	1585	4486	4910	2138	3224	1873	1826	1947	2474	1733	2154
ATCGAAAGGATGGGAGTACTAAGCTTATCAATAAATCAATTAAATCAATGATCAATAAATCAATAAAATCAATGATCAATTAATCAATCAAATCAATTATCAATTAATCAATCAAATCAATTTTAGTCAGCACGGACAAAGTACTGAGAT	TATCAATAAATCAATTAAATCAATGATCAATAAATCAATAAAATCAATGATCAATTAATCAATCAAATCAATTATCAATTAATCAATCAAATCAATTTTA	cat4		N	ATCAAT,AATCAAT,AAATCAAT-4-1	9	0	0	0	0	65	0	39	0	0	0	0	0	0
ATCGAAAGGATGGGAGTACTAAGCTTCTCAGCAATTGATCTGTATGGGCAGCTGGAAAATGGAAATCAATTTTGAGCAATTGATCTGACTTTGCAGCTGAACAGTGTAAATCAATAAGACGTTTAGTCAGCACGGACAAAGTACTGAGAT	TCTCAGCAATTGATCTGTATGGGCAGCTGGAAAATGGAAATCAATTTTGAGCAATTGATCTGACTTTGCAGCTGAACAGTGTAAATCAATAAGACGTTTA	cat4		N	ATTGATC,CAGCTG,AAATCAAT-2-8	1066	451	918	947	1873	1990	863	1354	188	42	0	1	126	120
ATCGAAAGGATGGGAGTACTAAGCTATCAATTATTGATTTATTGATTATCAATTATTGATTTATTGATTATCAATTATTGATTTATTGATTATCAATTATTGATTTATTGATTCCAAGACGTTTAGTCAGCACGGACAAAGTACTGAGAT	ATCAATTATTGATTTATTGATTATCAATTATTGATTTATTGATTATCAATTATTGATTTATTGATTATCAATTATTGATTTATTGATTCCAAGACGTTTA	cat4		N	ATCAAT,TATTGATT,TATTGATT-4-0	0	0	0	0	0	0	1	0	0	0	0	0	0	0
ATCGAAAGGATGGGAGTACTAAGCTTATTGATCCATCAATTAATCAATAATTGATCAATCAATCAATCAATTATTGATCGATCAATGAATCAATCATTGATCAATCAATTAATCAATGACGTTTAGTCAGCACGGACAAAGTACTGAGAT	TATTGATCCATCAATTAATCAATAATTGATCAATCAATCAATCAATTATTGATCGATCAATGAATCAATCATTGATCAATCAATTAATCAATGACGTTTA	cat4		N	ATTGATC,ATCAAT,AATCAAT-4-1	1622	431	543	578	1821	2239	3034	3853	0	0	2	2	0	0
ATCGAAAGGATGGGAGTACTAAGCTTCTCAGCACCATTTGTGTAATTGATCTAGGAAAATGGTCACTGAAAATCAATAGGTAGCCTGACTTTGTCCTATTGATTTGTCTTTCCCCAAGACGTTTAGTCAGCACGGACAAAGTACTGAGAT	TCTCAGCACCATTTGTGTAATTGATCTAGGAAAATGGTCACTGAAAATCAATAGGTAGCCTGACTTTGTCCTATTGATTTGTCTTTCCCCAAGACGTTTA	cat4		N	ATTGATC,AATCAAT,TATTGATT-1-19	2367	1698	2001	3016	3556	3594	2150	2652	752	499	420	506	478	447
ATCGAAAGGATGGGAGTACTAAGCTTCTCAGCAATCAATATGTATGGGCCATCTGAAAATGGTAAATCAATTTGAGCAGATCAATAGACTTTGTCCATCTGCAGTGTCTAAATCAATGACGTTTAGTCAGCACGGACAAAGTACTGAGAT	TCTCAGCAATCAATATGTATGGGCCATCTGAAAATGGTAAATCAATTTGAGCAGATCAATAGACTTTGTCCATCTGCAGTGTCTAAATCAATGACGTTTA	cat4		N	ATCAATA,CCATCTG,AAATCAAT-2-8	1656	1428	573	656	2355	2617	1632	1808	131	167	211	160	22	48
ATCGAAAGGATGGGAGTACTAAGCTTCTCAGCACCATTTGTGTATATTGATCAGGAAAATGGTCACTGAATTCAGCTGGGTAGCCTGACTTTGTCCTTAATCAATGTCTTTCCCCAAGACGTTTAGTCAGCACGGACAAAGTACTGAGAT	TCTCAGCACCATTTGTGTATATTGATCAGGAAAATGGTCACTGAATTCAGCTGGGTAGCCTGACTTTGTCCTTAATCAATGTCTTTCCCCAAGACGTTTA	cat4		N	ATTGATC,CAGCTG,AATCAAT-1-20	1844	1211	863	898	4411	4551	2279	2381	481	294	93	410	451	661
ATCGAAAGGATGGGAGTACTAAGCTTCTCAGCACCATTTGTGTACAGCTGATAGGAAAATGGTCACTGAATCAATACAGGTAGCCTGACTTTGTCAAATCAATGTGTCTTTCCCCAAGACGTTTAGTCAGCACGGACAAAGTACTGAGAT	TCTCAGCACCATTTGTGTACAGCTGATAGGAAAATGGTCACTGAATCAATACAGGTAGCCTGACTTTGTCAAATCAATGTGTCTTTCCCCAAGACGTTTA	cat4		N	CAGCTG,ATCAATA,AAATCAAT-1-19	3850	2459	1612	3029	2674	2627	892	2167	3492	3775	3225	4203	1412	1630
ATCGAAAGGATGGGAGTACTAAGCTTCTCAGCACAGATGGTGTATGGGCCATCTGAAAATGGTCCATCTGTTTGAGCACAGATGGTGACTTTGCCATCTGACAGTGTCCCATCTGAAGACGTTTAGTCAGCACGGACAAAGTACTGAGAT	TCTCAGCACAGATGGTGTATGGGCCATCTGAAAATGGTCCATCTGTTTGAGCACAGATGGTGACTTTGCCATCTGACAGTGTCCCATCTGAAGACGTTTA	cat4		N	CAGATGG,CCATCTG,CCATCTG-2-8	3454	2609	1606	1766	2852	3135	3897	4315	2375	2155	2468	3752	5847	5777
ATCGAAAGGATGGGAGTACTAAGCTATTGATCATTGATCAAATCAATATTGATCATTGATCAAATCAATATTGATCATTGATCAAATCAATATTGATCATTGATCAAATCAATCCAAGACGTTTAGTCAGCACGGACAAAGTACTGAGAT	ATTGATCATTGATCAAATCAATATTGATCATTGATCAAATCAATATTGATCATTGATCAAATCAATATTGATCATTGATCAAATCAATCCAAGACGTTTA	cat4		N	ATTGATC,ATTGATC,AAATCAAT-4-0	874	367	314	383	1353	1842	527	685	0	0	2	0	0	0
ATCGAAAGGATGGGAGTACTAAGCTTCCATCTGCAATCAATGAATCAATGCCATCTGAAATCAATCAATCAATGCCATCTGAAATCAATTAATCAATTCCATCTGGAATCAATCAATCAATTTTAGTCAGCACGGACAAAGTACTGAGAT	TCCATCTGCAATCAATGAATCAATGCCATCTGAAATCAATCAATCAATGCCATCTGAAATCAATTAATCAATTCCATCTGGAATCAATCAATCAATTTTA	cat4		N	CCATCTG,AATCAAT,AATCAAT-4-1	446	377	467	533	1423	1952	468	446	312	426	904	304	717	905
ATCGAAAGGATGGGAGTACTAAGCTTCTCAGCACCATTTGTGTATCCATCATAGGAAAATGGTCACTGAATCCATCAAGGTAGCCTGACTTTGTCCTATTGATTTGTCTTTCCCCAAGACGTTTAGTCAGCACGGACAAAGTACTGAGAT	TCTCAGCACCATTTGTGTATCCATCATAGGAAAATGGTCACTGAATCCATCAAGGTAGCCTGACTTTGTCCTATTGATTTGTCTTTCCCCAAGACGTTTA	cat4		N	TCCATCA,TCCATCA,TATTGATT-1-19	3684	2796	2570	3741	4483	4878	5636	7815	2562	1927	4145	3706	1723	2054
ATCGAAAGGATGGGAGTACTAAGCTTCTCAGCATCCATCATGTATGGGAATCAATAAAATGGTAAATCAATTTGAGCAGTCCATCAGACTTTGTAATCAATCAGTGTCTAAATCAATGACGTTTAGTCAGCACGGACAAAGTACTGAGAT	TCTCAGCATCCATCATGTATGGGAATCAATAAAATGGTAAATCAATTTGAGCAGTCCATCAGACTTTGTAATCAATCAGTGTCTAAATCAATGACGTTTA	cat4		N	TCCATCA,AATCAAT,AAATCAAT-2-8	1851	1252	709	1317	1375	1372	778	788	1109	771	821	1518	585	701
ATCGAAAGGATGGGAGTACTAAGCTTCTCAGCACCATTTGTGTATCCATCATAGGAAAATGGTCACTGAATCCATCAAGGTAGCCTGACTTTGTCCCCATCTGGTGTCTTTCCCCAAGACGTTTAGTCAGCACGGACAAAGTACTGAGAT	TCTCAGCACCATTTGTGTATCCATCATAGGAAAATGGTCACTGAATCCATCAAGGTAGCCTGACTTTGTCCCCATCTGGTGTCTTTCCCCAAGACGTTTA	cat4		N	TCCATCA,TCCATCA,CCATCTG-1-19	4468	3364	1961	4938	4121	4174	1858	2834	2810	2814	2964	4949	1300	1329
ATCGAAAGGATGGGAGTACTAAGCTTCTCAGCACCATTTGTGTATATTGATCAGGAAAATGGTCACTGAATTCAGCTGGGTAGCCTGACTTTGTCCTTTCCATCAGTCTTTCCCCAAGACGTTTAGTCAGCACGGACAAAGTACTGAGAT	TCTCAGCACCATTTGTGTATATTGATCAGGAAAATGGTCACTGAATTCAGCTGGGTAGCCTGACTTTGTCCTTTCCATCAGTCTTTCCCCAAGACGTTTA	cat4		N	ATTGATC,CAGCTG,TCCATCA-1-20	2403	2035	835	2172	4323	5532	4141	5955	424	554	257	655	382	590
ATCGAAAGGATGGGAGTACTAAGCTTATCAATACATCAATAGAATCAATGATCAATAAATCAATACAATCAATGATCAATAAATCAATATAATCAATTATCAATAGATCAATACAATCAATTTTAGTCAGCACGGACAAAGTACTGAGAT	TATCAATACATCAATAGAATCAATGATCAATAAATCAATACAATCAATGATCAATAAATCAATATAATCAATTATCAATAGATCAATACAATCAATTTTA	cat4		N	ATCAATA,ATCAATA,AATCAAT-4-1	223	0	0	0	0	48	0	43	0	0	0	0	0	0
ATCGAAAGGATGGGAGTACTAAGCTTCTCAGCACCATTTGTGTAATCAATATAGGAAAATGGTCACTGAAATCAATAAGGTAGCCTGACTTTGTCCAAATCAATTGTCTTTCCCCAAGACGTTTAGTCAGCACGGACAAAGTACTGAGAT	TCTCAGCACCATTTGTGTAATCAATATAGGAAAATGGTCACTGAAATCAATAAGGTAGCCTGACTTTGTCCAAATCAATTGTCTTTCCCCAAGACGTTTA	cat4		N	ATCAATA,ATCAATA,AAATCAAT-1-19	3221	2141	2517	3436	3298	3502	2434	3023	2097	1689	3835	3901	1120	1291
ATCGAAAGGATGGGAGTACTAAGCTTCTCAGCAATTGATCTGTATGGGATCAATGAAAATGGTATTGATTTTTGAGCAATTGATCTGACTTTGATCAATAACAGTGTTATTGATTAAGACGTTTAGTCAGCACGGACAAAGTACTGAGAT	TCTCAGCAATTGATCTGTATGGGATCAATGAAAATGGTATTGATTTTTGAGCAATTGATCTGACTTTGATCAATAACAGTGTTATTGATTAAGACGTTTA	cat4		N	ATTGATC,ATCAAT,TATTGATT-2-8	1472	1241	1706	1569	2226	2562	1914	1966	27	1	0	2	19	2
ATCGAAAGGATGGGAGTACTAAGCTTCTCAGCACCATTTGTGTATCAGCTGTAGGAAAATGGTCACTGAATCAGCTGAGGTAGCCTGACTTTGTCCTCAGATGGTGTCTTTCCCCAAGACGTTTAGTCAGCACGGACAAAGTACTGAGAT	TCTCAGCACCATTTGTGTATCAGCTGTAGGAAAATGGTCACTGAATCAGCTGAGGTAGCCTGACTTTGTCCTCAGATGGTGTCTTTCCCCAAGACGTTTA	cat4		N	CAGCTG,CAGCTG,CAGATGG-1-20	7000	5180	5229	8697	3696	3688	1847	1869	5939	4788	9288	9204	1889	2029
ATCGAAAGGATGGGAGTACTAAGCTTATTGATCCATTGATCGATTGATCGATTGATCAATTGATCCATTGATCGATTGATCAATTGATCTATTGATCTATTGATCGATTGATCCATTGATCTTTAGTCAGCACGGACAAAGTACTGAGAT	TATTGATCCATTGATCGATTGATCGATTGATCAATTGATCCATTGATCGATTGATCAATTGATCTATTGATCTATTGATCGATTGATCCATTGATCTTTA	cat4		N	ATTGATC,ATTGATC,ATTGATC-4-1	3814	2312	1313	1807	5439	5181	1820	2997	0	0	3	1	0	0
ATCGAAAGGATGGGAGTACTAAGCTTCTCAGCACCATTTGTGTAATTGATCTAGGAAAATGGTCACTGAACAGATGGAGGTAGCCTGACTTTGTCCCAGATGGGTGTCTTTCCCCAAGACGTTTAGTCAGCACGGACAAAGTACTGAGAT	TCTCAGCACCATTTGTGTAATTGATCTAGGAAAATGGTCACTGAACAGATGGAGGTAGCCTGACTTTGTCCCAGATGGGTGTCTTTCCCCAAGACGTTTA	cat4		N	ATTGATC,CAGATGG,CAGATGG-1-19	2355	1756	2485	3605	4232	4350	2785	2306	508	827	236	640	1165	1017
ATCGAAAGGATGGGAGTACTAAGCTTCCATCTGCCCATCTGGAATCAATGCCATCTGACCATCTGCAATCAATGCCATCTGACCATCTGTAATCAATTCCATCTGGCCATCTGCAATCAATTTTAGTCAGCACGGACAAAGTACTGAGAT	TCCATCTGCCCATCTGGAATCAATGCCATCTGACCATCTGCAATCAATGCCATCTGACCATCTGTAATCAATTCCATCTGGCCATCTGCAATCAATTTTA	cat4		N	CCATCTG,CCATCTG,AATCAAT-4-1	2403	2318	852	1347	3306	3427	1503	1560	1106	1360	1209	1336	1556	1561
ATCGAAAGGATGGGAGTACTAAGCTAATCAATAATCAATAAATCAATAATCAATAATCAATAAATCAATAATCAATAATCAATAAATCAATAATCAATAATCAATAAATCAATCCAAGACGTTTAGTCAGCACGGACAAAGTACTGAGAT	AATCAATAATCAATAAATCAATAATCAATAATCAATAAATCAATAATCAATAATCAATAAATCAATAATCAATAATCAATAAATCAATCCAAGACGTTTA	cat4		N	AATCAAT,AATCAAT,AAATCAAT-4-0	0	0	0	0	0	0	0	0	0	0	0	0	0	0
ATCGAAAGGATGGGAGTACTAAGCTTCTCAGCAATTGATCTGTATGGGCAGCTGGAAAATGGAATCAATATTTGAGCATTGATCCTGACTTTCAGCTGCAACAGTGAATCAATCCAAGACGTTTAGTCAGCACGGACAAAGTACTGAGAT	TCTCAGCAATTGATCTGTATGGGCAGCTGGAAAATGGAATCAATATTTGAGCATTGATCCTGACTTTCAGCTGCAACAGTGAATCAATCCAAGACGTTTA	cat4		N	ATTGATC,CAGCTG,AATCAAT-2-8	1408	979	734	1301	1556	1426	438	1034	131	110	218	138	71	48
ATCGAAAGGATGGGAGTACTAAGCTCCATCTGTATTGATTTATTGATTCCATCTGTATTGATTTATTGATTCCATCTGTATTGATTTATTGATTCCATCTGTATTGATTTATTGATTGACGTTTAGTCAGCACGGACAAAGTACTGAGAT	CCATCTGTATTGATTTATTGATTCCATCTGTATTGATTTATTGATTCCATCTGTATTGATTTATTGATTCCATCTGTATTGATTTATTGATTGACGTTTA	cat4		N	CCATCTG,TATTGATT,TATTGATT-4-0	1582	405	344	1281	1259	1485	867	1309	1242	732	1077	2157	498	591
ATCGAAAGGATGGGAGTACTAAGCTTCTCAGCACAGCTGGTGTATGGATCAATGGAAAATGCCATCTGAATTTGAGCAGCTGGCCTGACTATCAATTTCAACAGCCATCTGCCCCAAGACGTTTAGTCAGCACGGACAAAGTACTGAGAT	TCTCAGCACAGCTGGTGTATGGATCAATGGAAAATGCCATCTGAATTTGAGCAGCTGGCCTGACTATCAATTTCAACAGCCATCTGCCCCAAGACGTTTA	cat4		N	CAGCTG,ATCAAT,CCATCTG-2-8	3323	2821	2194	1946	2935	3618	2042	2592	1620	1778	1440	1658	2770	3202
ATCGAAAGGATGGGAGTACTAAGCTTCTCAGCAATTGATCTGTATGGGCAGCTGGAAAATGGCAGATGGATTTGAGCATTGATCCTGACTTTCAGCTGCAACAGTGCAGATGGCCAAGACGTTTAGTCAGCACGGACAAAGTACTGAGAT	TCTCAGCAATTGATCTGTATGGGCAGCTGGAAAATGGCAGATGGATTTGAGCATTGATCCTGACTTTCAGCTGCAACAGTGCAGATGGCCAAGACGTTTA	cat4		N	ATTGATC,CAGCTG,CAGATGG-2-8	1113	915	944	1328	2191	2492	1056	1474	299	78	208	215	425	387
ATCGAAAGGATGGGAGTACTAAGCTTCTCAGCACCATTTGTGTACAGCTGATAGGAAAATGGTCACTGACCATCTGCAGGTAGCCTGACTTTGTCTATTGATTGTGTCTTTCCCCAAGACGTTTAGTCAGCACGGACAAAGTACTGAGAT	TCTCAGCACCATTTGTGTACAGCTGATAGGAAAATGGTCACTGACCATCTGCAGGTAGCCTGACTTTGTCTATTGATTGTGTCTTTCCCCAAGACGTTTA	cat4		N	CAGCTG,CCATCTG,TATTGATT-1-19	3201	2412	3159	3343	5889	6719	3123	4014	3097	2650	5284	5151	2957	3502
ATCGAAAGGATGGGAGTACTAAGCTTCTCAGCACCATTTGTGTAATTGATCTAGGAAAATGGTCACTGAAATCAATAAGGTAGCCTGACTTTGTCCCCATCTGGTGTCTTTCCCCAAGACGTTTAGTCAGCACGGACAAAGTACTGAGAT	TCTCAGCACCATTTGTGTAATTGATCTAGGAAAATGGTCACTGAAATCAATAAGGTAGCCTGACTTTGTCCCCATCTGGTGTCTTTCCCCAAGACGTTTA	cat4		N	ATTGATC,ATCAATA,CCATCTG-1-19	4757	3030	2060	3805	4906	5075	2751	4323	728	567	660	558	661	819
ATCGAAAGGATGGGAGTACTAAGCTTCTCAGCAATCAATATGTATGGGATCAATAAAAATGGTATCAATATTTGAGCATCAATACTGACTTTATCAATAAACAGTGTATCAATCCAAGACGTTTAGTCAGCACGGACAAAGTACTGAGAT	TCTCAGCAATCAATATGTATGGGATCAATAAAAATGGTATCAATATTTGAGCATCAATACTGACTTTATCAATAAACAGTGTATCAATCCAAGACGTTTA	cat4		N	ATCAATA,ATCAATA,ATCAAT-2-8	1809	1237	974	1032	1156	1411	719	1075	153	110	43	174	146	120
ATCGAAAGGATGGGAGTACTAAGCTTCTCAGCACAGATGGTGTATGGGCAGATGGAAAATGGTTATTGATTTTGAGCAGCAGATGGGACTTTGTCAGATGGCAGTGTCTTATTGATTGACGTTTAGTCAGCACGGACAAAGTACTGAGAT	TCTCAGCACAGATGGTGTATGGGCAGATGGAAAATGGTTATTGATTTTGAGCAGCAGATGGGACTTTGTCAGATGGCAGTGTCTTATTGATTGACGTTTA	cat4		N	CAGATGG,CAGATGG,TATTGATT-2-8	2720	2264	1379	2648	2159	2679	1181	1100	2020	1867	1816	2846	2028	1921
ATCGAAAGGATGGGAGTACTAAGCTCAGATGGAATCAATTATTGATTCAGATGGAATCAATTATTGATTCAGATGGAATCAATTATTGATTCAGATGGAATCAATTATTGATTCCAAGACGTTTAGTCAGCACGGACAAAGTACTGAGAT	CAGATGGAATCAATTATTGATTCAGATGGAATCAATTATTGATTCAGATGGAATCAATTATTGATTCAGATGGAATCAATTATTGATTCCAAGACGTTTA	cat4		N	CAGATGG,AATCAAT,TATTGATT-4-0	364	572	304	541	2470	2823	1566	1561	139	357	1068	675	848	815
ATCGAAAGGATGGGAGTACTAAGCTTATTGATCCCAGATGGGTCCATCAGATTGATCACAGATGGCTCCATCAGATTGATCACAGATGGTTCCATCATATTGATCGCAGATGGCTCCATCATTTAGTCAGCACGGACAAAGTACTGAGAT	TATTGATCCCAGATGGGTCCATCAGATTGATCACAGATGGCTCCATCAGATTGATCACAGATGGTTCCATCATATTGATCGCAGATGGCTCCATCATTTA	cat4		N	ATTGATC,CAGATGG,TCCATCA-4-1	2694	1932	1585	2598	3122	3528	1205	2308	75	59	2	61	159	315
ATCGAAAGGATGGGAGTACTAAGCTTCTCAGCACAGATGGTGTATGGGCAGATGGAAAATGGTTCCATCATTTGAGCACAGATGGTGACTTTGCAGATGGACAGTGTCTCCATCAAAGACGTTTAGTCAGCACGGACAAAGTACTGAGAT	TCTCAGCACAGATGGTGTATGGGCAGATGGAAAATGGTTCCATCATTTGAGCACAGATGGTGACTTTGCAGATGGACAGTGTCTCCATCAAAGACGTTTA	cat4		N	CAGATGG,CAGATGG,TCCATCA-2-8	3889	2693	2598	4553	4631	4495	2485	3495	2851	2362	5243	6658	4337	3957
ATCGAAAGGATGGGAGTACTAAGCTTCAGCTGACAGATGGTCCATCTGACAGCTGACAGATGGCCCATCTGTCAGCTGGCAGATGGGCCATCTGCCAGCTGCCAGATGGTCCATCTGGACGTTTAGTCAGCACGGACAAAGTACTGAGAT	TCAGCTGACAGATGGTCCATCTGACAGCTGACAGATGGCCCATCTGTCAGCTGGCAGATGGGCCATCTGCCAGCTGCCAGATGGTCCATCTGGACGTTTA	cat4		N	CAGCTG,CAGATGG,CCATCTG-4-1	1819	1840	4433	4857	703	1053	594	420	1779	1305	4268	5664	2810	3245
ATCGAAAGGATGGGAGTACTAAGCTTATTGATCCATTGATCGTCCATCAGATTGATCAATTGATCCTCCATCAGATTGATCAATTGATCTTCCATCATATTGATCGATTGATCCTCCATCATTTAGTCAGCACGGACAAAGTACTGAGAT	TATTGATCCATTGATCGTCCATCAGATTGATCAATTGATCCTCCATCAGATTGATCAATTGATCTTCCATCATATTGATCGATTGATCCTCCATCATTTA	cat4		N	ATTGATC,ATTGATC,TCCATCA-4-1	5716	3551	4040	5762	5618	5683	1776	2317	9	0	3	3	9	1
ATCGAAAGGATGGGAGTACTAAGCTTCTCAGCACCATTTGTGTATCAGCTGTAGGAAAATGGTCACTGAATCAGCTGAGGTAGCCTGACTTTGTCCTTCCATCATGTCTTTCCCCAAGACGTTTAGTCAGCACGGACAAAGTACTGAGAT	TCTCAGCACCATTTGTGTATCAGCTGTAGGAAAATGGTCACTGAATCAGCTGAGGTAGCCTGACTTTGTCCTTCCATCATGTCTTTCCCCAAGACGTTTA	cat4		N	CAGCTG,CAGCTG,TCCATCA-1-20	4665	3379	2149	2290	5594	6081	4324	5754	3949	3378	4012	3454	2650	3008
ATCGAAAGGATGGGAGTACTAAGCTATTGATCTATTGATTTATTGATTATTGATCTATTGATTTATTGATTATTGATCTATTGATTTATTGATTATTGATCTATTGATTTATTGATTGACGTTTAGTCAGCACGGACAAAGTACTGAGAT	ATTGATCTATTGATTTATTGATTATTGATCTATTGATTTATTGATTATTGATCTATTGATTTATTGATTATTGATCTATTGATTTATTGATTGACGTTTA	cat4		N	ATTGATC,TATTGATT,TATTGATT-4-0	188	0	0	0	0	11	0	3	0	0	0	0	0	0
ATCGAAAGGATGGGAGTACTAAGCTTCTCAGCACCATTTGTGTATTCCATCAAGGAAAATGGTCACTGAATTATCAATGGTAGCCTGACTTTGTCCTTAATCAATGTCTTTCCCCAAGACGTTTAGTCAGCACGGACAAAGTACTGAGAT	TCTCAGCACCATTTGTGTATTCCATCAAGGAAAATGGTCACTGAATTATCAATGGTAGCCTGACTTTGTCCTTAATCAATGTCTTTCCCCAAGACGTTTA	cat4		N	TCCATCA,ATCAAT,AATCAAT-1-20	4983	3898	3668	6349	4521	4770	2723	4490	2538	2171	2782	4950	2401	2430
ATCGAAAGGATGGGAGTACTAAGCTTCTCAGCAATTGATCTGTATGGGATTGATCAAAATGGTATCAATATTTGAGCAATTGATCTGACTTTGATTGATCACAGTGTCATCAATAAAGACGTTTAGTCAGCACGGACAAAGTACTGAGAT	TCTCAGCAATTGATCTGTATGGGATTGATCAAAATGGTATCAATATTTGAGCAATTGATCTGACTTTGATTGATCACAGTGTCATCAATAAAGACGTTTA	cat4		N	ATTGATC,ATTGATC,ATCAATA-2-8	2246	1320	1070	2278	2403	3210	1309	1990	22	36	1	0	1	8
ATCGAAAGGATGGGAGTACTAAGCTTCTCAGCAATTGATCTGTATGGGATTGATCAAAATGGTAATCAATTTTGAGCAATTGATCTGACTTTGATTGATCACAGTGTCAATCAATAAGACGTTTAGTCAGCACGGACAAAGTACTGAGAT	TCTCAGCAATTGATCTGTATGGGATTGATCAAAATGGTAATCAATTTTGAGCAATTGATCTGACTTTGATTGATCACAGTGTCAATCAATAAGACGTTTA	cat4		N	ATTGATC,ATTGATC,AATCAAT-2-8	3536	2498	1236	1641	2397	2372	1058	1720	89	104	0	99	1	11
ATCGAAAGGATGGGAGTACTAAGCTTCTCAGCAATTGATCTGTATGGGCCATCTGAAAATGGTCCATCTGTTTGAGCAATTGATCTGACTTTGCCATCTGACAGTGTCCCATCTGAAGACGTTTAGTCAGCACGGACAAAGTACTGAGAT	TCTCAGCAATTGATCTGTATGGGCCATCTGAAAATGGTCCATCTGTTTGAGCAATTGATCTGACTTTGCCATCTGACAGTGTCCCATCTGAAGACGTTTA	cat4		N	ATTGATC,CCATCTG,CCATCTG-2-8	2116	1565	1245	1337	3975	4365	2163	3729	268	196	172	4	406	436
ATCGAAAGGATGGGAGTACTAAGCTTCTCAGCAATTGATCTGTATGGGCAGATGGAAAATGGTAAATCAATTTGAGCAGATTGATCGACTTTGTCAGATGGCAGTGTCTAAATCAATGACGTTTAGTCAGCACGGACAAAGTACTGAGAT	TCTCAGCAATTGATCTGTATGGGCAGATGGAAAATGGTAAATCAATTTGAGCAGATTGATCGACTTTGTCAGATGGCAGTGTCTAAATCAATGACGTTTA	cat4		N	ATTGATC,CAGATGG,AAATCAAT-2-8	2072	1227	1398	2717	2469	2696	1255	1734	23	47	1	0	85	108
ATCGAAAGGATGGGAGTACTAAGCTTCTCAGCACAGATGGTGTATGGGTCCATCAAAAATGGTCCATCTGTTTGAGCACAGATGGTGACTTTGTCCATCAACAGTGTCCCATCTGAAGACGTTTAGTCAGCACGGACAAAGTACTGAGAT	TCTCAGCACAGATGGTGTATGGGTCCATCAAAAATGGTCCATCTGTTTGAGCACAGATGGTGACTTTGTCCATCAACAGTGTCCCATCTGAAGACGTTTA	cat4		N	CAGATGG,TCCATCA,CCATCTG-2-8	7362	5567	4431	6373	3124	3500	2011	3304	3713	3744	4491	6227	3986	4578
ATCGAAAGGATGGGAGTACTAAGCTTCTCAGCACAGCTGGTGTATGGTCCATCAGAAAATGGATCAATAATTTGAGCAGCTGGCCTGACTTCCATCATCAACAGTATCAATCCCCAAGACGTTTAGTCAGCACGGACAAAGTACTGAGAT	TCTCAGCACAGCTGGTGTATGGTCCATCAGAAAATGGATCAATAATTTGAGCAGCTGGCCTGACTTCCATCATCAACAGTATCAATCCCCAAGACGTTTA	cat4		N	CAGCTG,TCCATCA,ATCAAT-2-8	1874	1346	629	1529	2681	2957	3396	4518	416	443	225	515	666	575
ATCGAAAGGATGGGAGTACTAAGCTTCAGCTGACAGCTGGATCAATAGCAGCTGGCAGCTGGATCAATAACAGCTGCCAGCTGCATCAATATCAGCTGCCAGCTGGATCAATACCAAGACGTTTAGTCAGCACGGACAAAGTACTGAGAT	TCAGCTGACAGCTGGATCAATAGCAGCTGGCAGCTGGATCAATAACAGCTGCCAGCTGCATCAATATCAGCTGCCAGCTGGATCAATACCAAGACGTTTA	cat4		N	CAGCTG,CAGCTG,ATCAATA-4-1	1504	1578	1804	1021	2328	2553	1588	1844	410	614	440	1108	284	526
ATCGAAAGGATGGGAGTACTAAGCTTCATCAATCCATCAATGTATCAATGAATCAATAAATCAATCTATCAATGAATCAATAGATCAATTTATCAATTCATCAATGTATCAATCCATCAATTTTAGTCAGCACGGACAAAGTACTGAGAT	TCATCAATCCATCAATGTATCAATGAATCAATAAATCAATCTATCAATGAATCAATAGATCAATTTATCAATTCATCAATGTATCAATCCATCAATTTTA	cat4		N	ATCAAT,ATCAAT,ATCAAT-4-2	814	10	220	70	499	1138	577	709	0	0	0	1	0	0
ATCGAAAGGATGGGAGTACTAAGCTTCTCAGCACCATTTGTGTAATTGATCTAGGAAAATGGTCACTGAATCCATCAAGGTAGCCTGACTTTGTCCAAATCAATTGTCTTTCCCCAAGACGTTTAGTCAGCACGGACAAAGTACTGAGAT	TCTCAGCACCATTTGTGTAATTGATCTAGGAAAATGGTCACTGAATCCATCAAGGTAGCCTGACTTTGTCCAAATCAATTGTCTTTCCCCAAGACGTTTA	cat4		N	ATTGATC,TCCATCA,AAATCAAT-1-19	3053	2511	1361	1853	3386	3634	2981	3594	570	680	129	510	592	502
ATCGAAAGGATGGGAGTACTAAGCTTCTCAGCACAGATGGTGTATGGGCAGATGGAAAATGGTCCATCTGTTTGAGCACAGATGGTGACTTTGCAGATGGACAGTGTCCCATCTGAAGACGTTTAGTCAGCACGGACAAAGTACTGAGAT	TCTCAGCACAGATGGTGTATGGGCAGATGGAAAATGGTCCATCTGTTTGAGCACAGATGGTGACTTTGCAGATGGACAGTGTCCCATCTGAAGACGTTTA	cat4		N	CAGATGG,CAGATGG,CCATCTG-2-8	2456	1934	777	1529	2199	2259	1576	2999	2038	1491	1282	1710	3501	4138
ATCGAAAGGATGGGAGTACTAAGCTTCTCAGCACAGCTGGTGTATGGATCAATAGAAAATGGCCATCTGATTTGAGCCAGCTGCCTGACTTATCAATACAACAGTGCCATCTGCCAAGACGTTTAGTCAGCACGGACAAAGTACTGAGAT	TCTCAGCACAGCTGGTGTATGGATCAATAGAAAATGGCCATCTGATTTGAGCCAGCTGCCTGACTTATCAATACAACAGTGCCATCTGCCAAGACGTTTA	cat4		N	CAGCTG,ATCAATA,CCATCTG-2-8	2170	1421	844	1478	2957	3110	2023	4511	977	522	1035	593	2123	2234
ATCGAAAGGATGGGAGTACTAAGCTTCTCAGCACCATTTGTGTAATTGATCTAGGAAAATGGTCACTGAACAGATGGAGGTAGCCTGACTTTGTCCCCATCTGGTGTCTTTCCCCAAGACGTTTAGTCAGCACGGACAAAGTACTGAGAT	TCTCAGCACCATTTGTGTAATTGATCTAGGAAAATGGTCACTGAACAGATGGAGGTAGCCTGACTTTGTCCCCATCTGGTGTCTTTCCCCAAGACGTTTA	cat4		N	ATTGATC,CAGATGG,CCATCTG-1-19	4641	3239	2676	3691	3867	3989	2643	4126	1262	1137	743	498	1433	1692
ATCGAAAGGATGGGAGTACTAAGCTTCTCAGCAATCAATGTGTATGGCCATCTGGAAAATGGTATTGATTTTTGAGCAATCAATCTGACTTTCCATCTGAACAGTGTTATTGATTAAGACGTTTAGTCAGCACGGACAAAGTACTGAGAT	TCTCAGCAATCAATGTGTATGGCCATCTGGAAAATGGTATTGATTTTTGAGCAATCAATCTGACTTTCCATCTGAACAGTGTTATTGATTAAGACGTTTA	cat4		N	ATCAAT,CCATCTG,TATTGATT-2-8	2224	1735	2427	1854	3391	4014	1432	3632	1957	1920	4520	2383	1812	1549
ATCGAAAGGATGGGAGTACTAAGCTTCTCAGCACAGCTGGTGTATGGATCAATAGAAAATGGAAATCAATTTTGAGCACAGCTGCTGACTTTATCAATAAACAGTGTAAATCAATAAGACGTTTAGTCAGCACGGACAAAGTACTGAGAT	TCTCAGCACAGCTGGTGTATGGATCAATAGAAAATGGAAATCAATTTTGAGCACAGCTGCTGACTTTATCAATAAACAGTGTAAATCAATAAGACGTTTA	cat4		N	CAGCTG,ATCAATA,AAATCAAT-2-8	724	556	374	615	1286	1210	409	845	474	224	397	330	838	752
ATCGAAAGGATGGGAGTACTAAGCTTCAGCTGAATCAATATTATTGATTGCAGCTGAATCAATAATATTGATTGCAGCTGTATCAATACTATTGATTTCAGCTGTATCAATACTATTGATTTTTAGTCAGCACGGACAAAGTACTGAGAT	TCAGCTGAATCAATATTATTGATTGCAGCTGAATCAATAATATTGATTGCAGCTGTATCAATACTATTGATTTCAGCTGTATCAATACTATTGATTTTTA	cat4		N	CAGCTG,ATCAATA,TATTGATT-4-1	958	477	140	493	628	888	225	154	410	305	310	399	219	225
ATCGAAAGGATGGGAGTACTAAGCTTCAGATGGCCAGATGGGATCAATACAGATGGACAGATGGAATCAATTCAGATGGGCAGATGGAATCAATCCAGATGGACAGATGGTATCAATGACGTTTAGTCAGCACGGACAAAGTACTGAGAT	TCAGATGGCCAGATGGGATCAATACAGATGGACAGATGGAATCAATTCAGATGGGCAGATGGAATCAATCCAGATGGACAGATGGTATCAATGACGTTTA	cat4		N	CAGATGG,CAGATGG,ATCAAT-4-1	1581	1159	1048	1489	1533	1744	1046	735	547	285	940	588	1148	1041
ATCGAAAGGATGGGAGTACTAAGCTTCTCAGCAATTGATCTGTATGGGCAGCTGGAAAATGGATCAATAATTTGAGCATTGATCCTGACTTTCAGCTGCAACAGTGATCAATACCAAGACGTTTAGTCAGCACGGACAAAGTACTGAGAT	TCTCAGCAATTGATCTGTATGGGCAGCTGGAAAATGGATCAATAATTTGAGCATTGATCCTGACTTTCAGCTGCAACAGTGATCAATACCAAGACGTTTA	cat4		N	ATTGATC,CAGCTG,ATCAATA-2-8	1243	845	955	953	2223	2358	1064	846	114	135	114	7	3	14
ATCGAAAGGATGGGAGTACTAAGCTTCAGATGGCTCCATCAGTCCATCAGCAGATGGATCCATCACTCCATCAGCAGATGGATCCATCATTCCATCATCAGATGGGTCCATCACTCCATCATTTAGTCAGCACGGACAAAGTACTGAGAT	TCAGATGGCTCCATCAGTCCATCAGCAGATGGATCCATCACTCCATCAGCAGATGGATCCATCATTCCATCATCAGATGGGTCCATCACTCCATCATTTA	cat4		N	CAGATGG,TCCATCA,TCCATCA-4-1	4540	3380	2890	3331	6448	6828	4552	5061	572	202	1382	1310	272	242
ATCGAAAGGATGGGAGTACTAAGCTCCATCTGCCATCTGTATTGATTCCATCTGCCATCTGTATTGATTCCATCTGCCATCTGTATTGATTCCATCTGCCATCTGTATTGATTCCAAGACGTTTAGTCAGCACGGACAAAGTACTGAGAT	CCATCTGCCATCTGTATTGATTCCATCTGCCATCTGTATTGATTCCATCTGCCATCTGTATTGATTCCATCTGCCATCTGTATTGATTCCAAGACGTTTA	cat4		N	CCATCTG,CCATCTG,TATTGATT-4-0	655	449	702	633	440	360	405	545	517	281	699	733	692	721
ATCGAAAGGATGGGAGTACTAAGCTTTCCATCACTCCATCAGTCCATCAGTCCATCAATCCATCACTCCATCAGTCCATCAATCCATCATTCCATCATTCCATCAGTCCATCACTCCATCATTTAGTCAGCACGGACAAAGTACTGAGAT	TTCCATCACTCCATCAGTCCATCAGTCCATCAATCCATCACTCCATCAGTCCATCAATCCATCATTCCATCATTCCATCAGTCCATCACTCCATCATTTA	cat4		N	TCCATCA,TCCATCA,TCCATCA-4-1	874	594	376	508	1015	1327	832	868	630	287	431	562	400	379
ATCGAAAGGATGGGAGTACTAAGCTTCAGCTGATCCATCATTCCATCAACAGCTGATCCATCACTCCATCATCAGCTGGTCCATCAGTCCATCACCAGCTGCTCCATCATTCCATCAGACGTTTAGTCAGCACGGACAAAGTACTGAGAT	TCAGCTGATCCATCATTCCATCAACAGCTGATCCATCACTCCATCATCAGCTGGTCCATCAGTCCATCACCAGCTGCTCCATCATTCCATCAGACGTTTA	cat4		N	CAGCTG,TCCATCA,TCCATCA-4-1	7897	5754	3165	4418	6587	7258	3908	6504	643	837	1002	145	706	668
ATCGAAAGGATGGGAGTACTAAGCTTCTCAGCACCATTTGTGTAAATCAATTAGGAAAATGGTCACTGAATATTGATTGGTAGCCTGACTTTGTCCTTATTGATTGTCTTTCCCCAAGACGTTTAGTCAGCACGGACAAAGTACTGAGAT	TCTCAGCACCATTTGTGTAAATCAATTAGGAAAATGGTCACTGAATATTGATTGGTAGCCTGACTTTGTCCTTATTGATTGTCTTTCCCCAAGACGTTTA	cat4		N	AATCAAT,TATTGATT,TATTGATT-1-19	4218	2519	3395	3404	3619	3754	2801	3235	3183	2885	5618	5478	1625	1672
ATCGAAAGGATGGGAGTACTAAGCTTCCATCAATCAATATATTGATTTCCATCAATCAATATATTGATTTCCATCAATCAATATATTGATTTCCATCAATCAATATATTGATTCCAAGACGTTTAGTCAGCACGGACAAAGTACTGAGAT	TCCATCAATCAATATATTGATTTCCATCAATCAATATATTGATTTCCATCAATCAATATATTGATTTCCATCAATCAATATATTGATTCCAAGACGTTTA	cat4		N	TCCATCA,ATCAATA,TATTGATT-4-0	721	0	6	2	82	563	95	218	182	251	395	690	119	195
ATCGAAAGGATGGGAGTACTAAGCTTTCCATCACATCAATTTATTGATTGTCCATCAAATCAATATATTGATTGTCCATCAAATCAATCTATTGATTTTCCATCAGATCAATCTATTGATTTTTAGTCAGCACGGACAAAGTACTGAGAT	TTCCATCACATCAATTTATTGATTGTCCATCAAATCAATATATTGATTGTCCATCAAATCAATCTATTGATTTTCCATCAGATCAATCTATTGATTTTTA	cat4		N	TCCATCA,ATCAAT,TATTGATT-4-1	2125	1177	613	1592	2884	3088	1614	2544	44	0	96	62	31	41
ATCGAAAGGATGGGAGTACTAAGCTTATTGATCCATCAATTCCATCTGAATTGATCAATCAATCCCATCTGTATTGATCGATCAATGCCATCTGCATTGATCAATCAATTCCATCTGGACGTTTAGTCAGCACGGACAAAGTACTGAGAT	TATTGATCCATCAATTCCATCTGAATTGATCAATCAATCCCATCTGTATTGATCGATCAATGCCATCTGCATTGATCAATCAATTCCATCTGGACGTTTA	cat4		N	ATTGATC,ATCAAT,CCATCTG-4-1	2483	1589	1326	1853	3673	4088	1898	2795	1	0	1	0	0	1
ATCGAAAGGATGGGAGTACTAAGCTTCTCAGCAATCAATGTGTATGGTATTGATTAAAATGGTAAATCAATTTGAGCAGATCAATTGACTTTGTATTGATTCAGTGTCTAAATCAATGACGTTTAGTCAGCACGGACAAAGTACTGAGAT	TCTCAGCAATCAATGTGTATGGTATTGATTAAAATGGTAAATCAATTTGAGCAGATCAATTGACTTTGTATTGATTCAGTGTCTAAATCAATGACGTTTA	cat4		N	ATCAAT,TATTGATT,AAATCAAT-2-8	1587	1560	894	1766	2636	2779	639	1093	156	144	180	63	79	47
ATCGAAAGGATGGGAGTACTAAGCTTCTCAGCACAGATGGTGTATGGGCAGATGGAAAATGGTATCAATATTTGAGCACAGATGGTGACTTTGCAGATGGACAGTGTCATCAATAAAGACGTTTAGTCAGCACGGACAAAGTACTGAGAT	TCTCAGCACAGATGGTGTATGGGCAGATGGAAAATGGTATCAATATTTGAGCACAGATGGTGACTTTGCAGATGGACAGTGTCATCAATAAAGACGTTTA	cat4		N	CAGATGG,CAGATGG,ATCAATA-2-8	2480	1449	2430	3087	2385	2282	769	1304	1745	1604	5171	3550	1098	1067
ATCGAAAGGATGGGAGTACTAAGCTAATCAATTATTGATTTATTGATTAATCAATTATTGATTTATTGATTAATCAATTATTGATTTATTGATTAATCAATTATTGATTTATTGATTGACGTTTAGTCAGCACGGACAAAGTACTGAGAT	AATCAATTATTGATTTATTGATTAATCAATTATTGATTTATTGATTAATCAATTATTGATTTATTGATTAATCAATTATTGATTTATTGATTGACGTTTA	cat4		N	AATCAAT,TATTGATT,TATTGATT-4-0	0	0	0	1	0	0	0	0	0	0	0	0	0	0
ATCGAAAGGATGGGAGTACTAAGCTTCTCAGCAATCAATGTGTATGGATCAATGGAAAATGCCATCTGAATTTGAGATCAATGCCTGACTATCAATTTCAACAGCCATCTGCCCCAAGACGTTTAGTCAGCACGGACAAAGTACTGAGAT	TCTCAGCAATCAATGTGTATGGATCAATGGAAAATGCCATCTGAATTTGAGATCAATGCCTGACTATCAATTTCAACAGCCATCTGCCCCAAGACGTTTA	cat4		N	ATCAAT,ATCAAT,CCATCTG-2-8	2340	1631	995	1616	3263	3884	1116	1342	226	337	229	228	53	180
ATCGAAAGGATGGGAGTACTAAGCTTCTCAGCACAGCTGGTGTATGGCAGCTGGGAAAATGCAGATGGAATTTGAGCAGCTGGCCTGACTCAGCTGTTCAACAGCAGATGGCCCCAAGACGTTTAGTCAGCACGGACAAAGTACTGAGAT	TCTCAGCACAGCTGGTGTATGGCAGCTGGGAAAATGCAGATGGAATTTGAGCAGCTGGCCTGACTCAGCTGTTCAACAGCAGATGGCCCCAAGACGTTTA	cat4		N	CAGCTG,CAGCTG,CAGATGG-2-8	1723	1118	726	1325	533	617	457	551	2140	1519	1579	1436	1536	1541
ATCGAAAGGATGGGAGTACTAAGCTTCTCAGCACAGCTGGTGTATGGCAGATGGGAAAATGGCCATCTGATTTGAGCCAGCTGCCTGACTTCAGATGGCAACAGTGCCATCTGCCAAGACGTTTAGTCAGCACGGACAAAGTACTGAGAT	TCTCAGCACAGCTGGTGTATGGCAGATGGGAAAATGGCCATCTGATTTGAGCCAGCTGCCTGACTTCAGATGGCAACAGTGCCATCTGCCAAGACGTTTA	cat4		N	CAGCTG,CAGATGG,CCATCTG-2-8	3433	2958	3126	3120	3130	3424	2382	3888	2375	1799	4735	3783	3314	3836
ATCGAAAGGATGGGAGTACTAAGCTTCTCAGCAATCAATATGTATGGGATCAATGAAAATGGCCATCTGATTTGAGCATCAATACTGACTTTATCAATCAACAGTGCCATCTGCCAAGACGTTTAGTCAGCACGGACAAAGTACTGAGAT	TCTCAGCAATCAATATGTATGGGATCAATGAAAATGGCCATCTGATTTGAGCATCAATACTGACTTTATCAATCAACAGTGCCATCTGCCAAGACGTTTA	cat4		N	ATCAATA,ATCAAT,CCATCTG-2-8	3420	2025	1305	1711	2582	2734	715	1411	451	254	327	335	254	305
ATCGAAAGGATGGGAGTACTAAGCTTCTCAGCACCATTTGTGTACCATCTGTAGGAAAATGGTCACTGAACCATCTGAGGTAGCCTGACTTTGTCCAAATCAATTGTCTTTCCCCAAGACGTTTAGTCAGCACGGACAAAGTACTGAGAT	TCTCAGCACCATTTGTGTACCATCTGTAGGAAAATGGTCACTGAACCATCTGAGGTAGCCTGACTTTGTCCAAATCAATTGTCTTTCCCCAAGACGTTTA	cat4		N	CCATCTG,CCATCTG,AAATCAAT-1-19	2700	2136	1440	3082	5559	5438	3799	7493	2860	1961	1927	4785	1883	2571
ATCGAAAGGATGGGAGTACTAAGCTTCTCAGCACAGATGGTGTATGGGATCAATAAAAATGGTATCAATATTTGAGCCAGATGGCTGACTTTATCAATAAACAGTGTATCAATCCAAGACGTTTAGTCAGCACGGACAAAGTACTGAGAT	TCTCAGCACAGATGGTGTATGGGATCAATAAAAATGGTATCAATATTTGAGCCAGATGGCTGACTTTATCAATAAACAGTGTATCAATCCAAGACGTTTA	cat4		N	CAGATGG,ATCAATA,ATCAAT-2-8	1204	749	436	482	2108	2253	2147	1591	178	123	52	65	584	576
ATCGAAAGGATGGGAGTACTAAGCTTCTCAGCACCATTTGTGTAATTGATCTAGGAAAATGGTCACTGAACAGATGGAGGTAGCCTGACTTTGTCCAAATCAATTGTCTTTCCCCAAGACGTTTAGTCAGCACGGACAAAGTACTGAGAT	TCTCAGCACCATTTGTGTAATTGATCTAGGAAAATGGTCACTGAACAGATGGAGGTAGCCTGACTTTGTCCAAATCAATTGTCTTTCCCCAAGACGTTTA	cat4		N	ATTGATC,CAGATGG,AAATCAAT-1-19	2643	2235	1571	3470	3109	3372	2128	2271	760	575	538	870	913	1217
ATCGAAAGGATGGGAGTACTAAGCTAAATCAATAAATCAATAAATCAATAAATCAATAAATCAATAAATCAATAAATCAATAAATCAATAAATCAATAAATCAATAAATCAATAAATCAATTTTAGTCAGCACGGACAAAGTACTGAGAT	AAATCAATAAATCAATAAATCAATAAATCAATAAATCAATAAATCAATAAATCAATAAATCAATAAATCAATAAATCAATAAATCAATAAATCAATTTTA	cat4		N	AAATCAAT,AAATCAAT,AAATCAAT-4-0	0	0	0	0	0	1	0	0	0	0	0	0	0	0
ATCGAAAGGATGGGAGTACTAAGCTTATTGATCCCAGCTGTCAGCTGGATTGATCACAGCTGTCAGCTGAATTGATCACAGCTGCCAGCTGTATTGATCACAGCTGTCAGCTGCCAAGACGTTTAGTCAGCACGGACAAAGTACTGAGAT	TATTGATCCCAGCTGTCAGCTGGATTGATCACAGCTGTCAGCTGAATTGATCACAGCTGCCAGCTGTATTGATCACAGCTGTCAGCTGCCAAGACGTTTA	cat4		N	ATTGATC,CAGCTG,CAGCTG-4-1	1879	1955	606	890	2456	2405	1374	1928	333	175	212	571	611	902
ATCGAAAGGATGGGAGTACTAAGCTTCAGATGGCATCAATAGATCAATACAGATGGAATCAATAAATCAATTCAGATGGGATCAATAAATCAATCCAGATGGAATCAATATATCAATGACGTTTAGTCAGCACGGACAAAGTACTGAGAT	TCAGATGGCATCAATAGATCAATACAGATGGAATCAATAAATCAATTCAGATGGGATCAATAAATCAATCCAGATGGAATCAATATATCAATGACGTTTA	cat4		N	CAGATGG,ATCAATA,ATCAAT-4-1	600	451	113	180	979	1112	640	875	0	13	0	0	0	7
ATCGAAAGGATGGGAGTACTAAGCTTATCAATACATCAATTAAATCAATGATCAATAAATCAATAAAATCAATGATCAATAAATCAATCAAATCAATTATCAATAGATCAATCAAATCAATTTTAGTCAGCACGGACAAAGTACTGAGAT	TATCAATACATCAATTAAATCAATGATCAATAAATCAATAAAATCAATGATCAATAAATCAATCAAATCAATTATCAATAGATCAATCAAATCAATTTTA	cat4		N	ATCAATA,ATCAAT,AAATCAAT-4-1	0	0	0	0	0	270	6	125	0	0	1	0	0	0
ATCGAAAGGATGGGAGTACTAAGCTTCTCAGCACCATTTGTGTAATTGATCTAGGAAAATGGTCACTGAACAGCTGCAGGTAGCCTGACTTTGTCTATTGATTGTGTCTTTCCCCAAGACGTTTAGTCAGCACGGACAAAGTACTGAGAT	TCTCAGCACCATTTGTGTAATTGATCTAGGAAAATGGTCACTGAACAGCTGCAGGTAGCCTGACTTTGTCTATTGATTGTGTCTTTCCCCAAGACGTTTA	cat4		N	ATTGATC,CAGCTG,TATTGATT-1-19	2362	2141	1392	1845	4819	5184	3525	4946	1106	1084	370	528	860	870
ATCGAAAGGATGGGAGTACTAAGCTTATTGATCCCAGCTGTCAGATGGAATTGATCACAGCTGCCAGATGGTATTGATCGCAGCTGGCAGATGGCATTGATCACAGCTGTCAGATGGGACGTTTAGTCAGCACGGACAAAGTACTGAGAT	TATTGATCCCAGCTGTCAGATGGAATTGATCACAGCTGCCAGATGGTATTGATCGCAGCTGGCAGATGGCATTGATCACAGCTGTCAGATGGGACGTTTA	cat4		N	ATTGATC,CAGCTG,CAGATGG-4-1	1887	1595	1751	2000	2429	2743	771	1784	271	247	849	443	460	604
ATCGAAAGGATGGGAGTACTAAGCTTCTCAGCACAGATGGTGTATGGGTCCATCAAAAATGGTAATCAATTTTGAGCACAGATGGTGACTTTGTCCATCAACAGTGTCAATCAATAAGACGTTTAGTCAGCACGGACAAAGTACTGAGAT	TCTCAGCACAGATGGTGTATGGGTCCATCAAAAATGGTAATCAATTTTGAGCACAGATGGTGACTTTGTCCATCAACAGTGTCAATCAATAAGACGTTTA	cat4		N	CAGATGG,TCCATCA,AATCAAT-2-8	1232	727	697	771	2683	2878	962	1124	1191	849	1294	802	2156	2090
ATCGAAAGGATGGGAGTACTAAGCTTCAGCTGATCCATCATATCAATAACAGCTGATCCATCACATCAATATCAGCTGGTCCATCAGATCAATACCAGCTGCTCCATCATATCAATAGACGTTTAGTCAGCACGGACAAAGTACTGAGAT	TCAGCTGATCCATCATATCAATAACAGCTGATCCATCACATCAATATCAGCTGGTCCATCAGATCAATACCAGCTGCTCCATCATATCAATAGACGTTTA	cat4		N	CAGCTG,TCCATCA,ATCAATA-4-1	2455	1485	1112	1559	2966	3156	3039	2464	0	17	1	2	55	13
ATCGAAAGGATGGGAGTACTAAGCTTCTCAGCACCATCTGTGTATGGGAATCAATAAAATGGTAATCAATTTTGAGCACCATCTGTGACTTTGAATCAATACAGTGTCAATCAATAAGACGTTTAGTCAGCACGGACAAAGTACTGAGAT	TCTCAGCACCATCTGTGTATGGGAATCAATAAAATGGTAATCAATTTTGAGCACCATCTGTGACTTTGAATCAATACAGTGTCAATCAATAAGACGTTTA	cat4		N	CCATCTG,AATCAAT,AATCAAT-2-8	3101	2495	1011	1925	1483	1312	520	585	1438	1114	1594	1193	697	860
ATCGAAAGGATGGGAGTACTAAGCTTCTCAGCACCATTTGTGTAATTGATCTAGGAAAATGGTCACTGAACCATCTGAGGTAGCCTGACTTTGTCCCCATCTGGTGTCTTTCCCCAAGACGTTTAGTCAGCACGGACAAAGTACTGAGAT	TCTCAGCACCATTTGTGTAATTGATCTAGGAAAATGGTCACTGAACCATCTGAGGTAGCCTGACTTTGTCCCCATCTGGTGTCTTTCCCCAAGACGTTTA	cat4		N	ATTGATC,CCATCTG,CCATCTG-1-19	3802	2915	2695	3336	4397	4658	2636	2906	1010	591	814	280	809	652
ATCGAAAGGATGGGAGTACTAAGCTTCTCAGCAATCAATATGTATGGGAATCAATAAAATGGTAATCAATTTTGAGCAATCAATATGACTTTGAATCAATACAGTGTCAATCAATAAGACGTTTAGTCAGCACGGACAAAGTACTGAGAT	TCTCAGCAATCAATATGTATGGGAATCAATAAAATGGTAATCAATTTTGAGCAATCAATATGACTTTGAATCAATACAGTGTCAATCAATAAGACGTTTA	cat4		N	ATCAATA,AATCAAT,AATCAAT-2-8	2033	1085	1309	1751	1333	1405	502	477	1955	1079	2412	2692	387	403
ATCGAAAGGATGGGAGTACTAAGCTTCAGCTGACAGATGGTTCCATCAACAGCTGACAGATGGCTCCATCATCAGCTGGCAGATGGGTCCATCACCAGCTGCCAGATGGTTCCATCAGACGTTTAGTCAGCACGGACAAAGTACTGAGAT	TCAGCTGACAGATGGTTCCATCAACAGCTGACAGATGGCTCCATCATCAGCTGGCAGATGGGTCCATCACCAGCTGCCAGATGGTTCCATCAGACGTTTA	cat4		N	CAGCTG,CAGATGG,TCCATCA-4-1	3682	3048	2194	2831	1761	1931	1765	2244	2364	1944	4031	4126	5313	5735
ATCGAAAGGATGGGAGTACTAAGCTTCTCAGCAATTGATCTGTATGGGATTGATCAAAATGGTAAATCAATTTGAGCAGATTGATCGACTTTGTATTGATCCAGTGTCTAAATCAATGACGTTTAGTCAGCACGGACAAAGTACTGAGAT	TCTCAGCAATTGATCTGTATGGGATTGATCAAAATGGTAAATCAATTTGAGCAGATTGATCGACTTTGTATTGATCCAGTGTCTAAATCAATGACGTTTA	cat4		N	ATTGATC,ATTGATC,AAATCAAT-2-8	3203	2213	1743	1680	2852	2869	1510	1475	93	8	1	3	28	19
ATCGAAAGGATGGGAGTACTAAGCTAATCAATAATCAATTATTGATTAATCAATAATCAATTATTGATTAATCAATAATCAATTATTGATTAATCAATAATCAATTATTGATTCCAAGACGTTTAGTCAGCACGGACAAAGTACTGAGAT	AATCAATAATCAATTATTGATTAATCAATAATCAATTATTGATTAATCAATAATCAATTATTGATTAATCAATAATCAATTATTGATTCCAAGACGTTTA	cat4		N	AATCAAT,AATCAAT,TATTGATT-4-0	0	0	0	0	0	0	0	0	0	0	0	0	0	0
ATCGAAAGGATGGGAGTACTAAGCTTCTCAGCAATCAATATGTATGGGCCATCTGAAAATGGTAATCAATTTTGAGCAATCAATATGACTTTGCCATCTGACAGTGTCAATCAATAAGACGTTTAGTCAGCACGGACAAAGTACTGAGAT	TCTCAGCAATCAATATGTATGGGCCATCTGAAAATGGTAATCAATTTTGAGCAATCAATATGACTTTGCCATCTGACAGTGTCAATCAATAAGACGTTTA	cat4		N	ATCAATA,CCATCTG,AATCAAT-2-8	2569	2260	1278	2377	2066	2216	1044	1050	1548	1299	1687	2291	806	751
ATCGAAAGGATGGGAGTACTAAGCTTCTCAGCAATTGATCTGTATGGGCAGATGGAAAATGGTCCATCTGTTTGAGCAATTGATCTGACTTTGCAGATGGACAGTGTCCCATCTGAAGACGTTTAGTCAGCACGGACAAAGTACTGAGAT	TCTCAGCAATTGATCTGTATGGGCAGATGGAAAATGGTCCATCTGTTTGAGCAATTGATCTGACTTTGCAGATGGACAGTGTCCCATCTGAAGACGTTTA	cat4		N	ATTGATC,CAGATGG,CCATCTG-2-8	2402	2011	1405	1492	3273	3901	2213	2811	82	309	84	74	301	254
ATCGAAAGGATGGGAGTACTAAGCTTCTCAGCATCCATCATGTATGGGTCCATCAAAAATGGTATCAATATTTGAGCATCCATCATGACTTTGTCCATCAACAGTGTCATCAATAAAGACGTTTAGTCAGCACGGACAAAGTACTGAGAT	TCTCAGCATCCATCATGTATGGGTCCATCAAAAATGGTATCAATATTTGAGCATCCATCATGACTTTGTCCATCAACAGTGTCATCAATAAAGACGTTTA	cat4		N	TCCATCA,TCCATCA,ATCAATA-2-8	4195	2709	1892	2230	3899	4206	2746	3621	2619	1954	1353	2389	1006	1124
ATCGAAAGGATGGGAGTACTAAGCTTCTCAGCACAGATGGTGTATGGGATCAATGAAAATGGTATTGATTTTTGAGCACAGATGGTGACTTTGATCAATAACAGTGTTATTGATTAAGACGTTTAGTCAGCACGGACAAAGTACTGAGAT	TCTCAGCACAGATGGTGTATGGGATCAATGAAAATGGTATTGATTTTTGAGCACAGATGGTGACTTTGATCAATAACAGTGTTATTGATTAAGACGTTTA	cat4		N	CAGATGG,ATCAAT,TATTGATT-2-8	1935	1244	412	808	1808	2009	922	1474	15	0	0	1	176	199
ATCGAAAGGATGGGAGTACTAAGCTTCTCAGCACAGCTGGTGTATGGCCATCTGGAAAATGGAATCAATATTTGAGCCAGCTGCCTGACTTCCATCTGCAACAGTGAATCAATCCAAGACGTTTAGTCAGCACGGACAAAGTACTGAGAT	TCTCAGCACAGCTGGTGTATGGCCATCTGGAAAATGGAATCAATATTTGAGCCAGCTGCCTGACTTCCATCTGCAACAGTGAATCAATCCAAGACGTTTA	cat4		N	CAGCTG,CCATCTG,AATCAAT-2-8	1622	908	684	597	1901	2208	1571	1408	1070	687	910	1026	1645	1849
ATCGAAAGGATGGGAGTACTAAGCTTCTCAGCACCATTTGTGTAAATCAATTAGGAAAATGGTCACTGAAAATCAATAGGTAGCCTGACTTTGTCCTATTGATTTGTCTTTCCCCAAGACGTTTAGTCAGCACGGACAAAGTACTGAGAT	TCTCAGCACCATTTGTGTAAATCAATTAGGAAAATGGTCACTGAAAATCAATAGGTAGCCTGACTTTGTCCTATTGATTTGTCTTTCCCCAAGACGTTTA	cat4		N	AATCAAT,AATCAAT,TATTGATT-1-19	4598	3206	2652	5368	3172	4180	1860	3645	3788	3347	6410	9198	1379	1452
ATCGAAAGGATGGGAGTACTAAGCTATCAATAAATCAATTATTGATTATCAATAAATCAATTATTGATTATCAATAAATCAATTATTGATTATCAATAAATCAATTATTGATTCCAAGACGTTTAGTCAGCACGGACAAAGTACTGAGAT	ATCAATAAATCAATTATTGATTATCAATAAATCAATTATTGATTATCAATAAATCAATTATTGATTATCAATAAATCAATTATTGATTCCAAGACGTTTA	cat4		N	ATCAATA,AATCAAT,TATTGATT-4-0	1	0	0	0	0	0	0	0	0	0	0	0	0	0
ATCGAAAGGATGGGAGTACTAAGCTTCTCAGCAATCAATGTGTATGGATCAATGGAAAATGAATCAATAATTTGAGATCAATGCCTGACTATCAATTTCAACAGAATCAATCCCCAAGACGTTTAGTCAGCACGGACAAAGTACTGAGAT	TCTCAGCAATCAATGTGTATGGATCAATGGAAAATGAATCAATAATTTGAGATCAATGCCTGACTATCAATTTCAACAGAATCAATCCCCAAGACGTTTA	cat4		N	ATCAAT,ATCAAT,AATCAAT-2-8	2054	1655	2978	2427	2275	2442	1425	1487	92	152	115	23	15	84
ATCGAAAGGATGGGAGTACTAAGCTTCTCAGCACCATTTGTGTATCCATCATAGGAAAATGGTCACTGAAATCAATCAGGTAGCCTGACTTTGTCTATTGATTGTGTCTTTCCCCAAGACGTTTAGTCAGCACGGACAAAGTACTGAGAT	TCTCAGCACCATTTGTGTATCCATCATAGGAAAATGGTCACTGAAATCAATCAGGTAGCCTGACTTTGTCTATTGATTGTGTCTTTCCCCAAGACGTTTA	cat4		N	TCCATCA,ATCAAT,TATTGATT-1-19	1992	1198	1564	1844	5648	5989	3719	5824	1327	892	2904	2480	2061	2009
ATCGAAAGGATGGGAGTACTAAGCTTCCAGCTGCCCAGCTGGTCAGCTGGACAGCTGAACAGCTGCTCAGCTGGACAGCTGAGCAGCTGTTCAGCTGTCCAGCTGGTCAGCTGCCCAGCTGTTTAGTCAGCACGGACAAAGTACTGAGAT	TCCAGCTGCCCAGCTGGTCAGCTGGACAGCTGAACAGCTGCTCAGCTGGACAGCTGAGCAGCTGTTCAGCTGTCCAGCTGGTCAGCTGCCCAGCTGTTTA	cat4		N	CAGCTG,CAGCTG,CAGCTG-4-2	0	0	0	0	0	0	0	0	0	0	0	0	0	0
ATCGAAAGGATGGGAGTACTAAGCTTCTCAGCACCATTTGTGTATCAGATGGAGGAAAATGGTCACTGAATTATCAATGGTAGCCTGACTTTGTCCTTAATCAATGTCTTTCCCCAAGACGTTTAGTCAGCACGGACAAAGTACTGAGAT	TCTCAGCACCATTTGTGTATCAGATGGAGGAAAATGGTCACTGAATTATCAATGGTAGCCTGACTTTGTCCTTAATCAATGTCTTTCCCCAAGACGTTTA	cat4		N	CAGATGG,ATCAAT,AATCAAT-1-20	2740	2631	2802	3044	4857	5091	3336	3345	2294	2103	3281	4417	1992	2644
ATCGAAAGGATGGGAGTACTAAGCTTCTCAGCACCATCTGTGTATGGGCCATCTGAAAATGGTCCATCTGTTTGAGCACCATCTGTGACTTTGCCATCTGACAGTGTCCCATCTGAAGACGTTTAGTCAGCACGGACAAAGTACTGAGAT	TCTCAGCACCATCTGTGTATGGGCCATCTGAAAATGGTCCATCTGTTTGAGCACCATCTGTGACTTTGCCATCTGACAGTGTCCCATCTGAAGACGTTTA	cat4		N	CCATCTG,CCATCTG,CCATCTG-2-8	5173	4030	3678	5444	4116	4879	1432	2226	2761	2434	4797	5342	2761	2447
ATCGAAAGGATGGGAGTACTAAGCTTATTGATCCCAGCTGTCCATCTGAATTGATCACAGCTGCCCATCTGTATTGATCGCAGCTGGCCATCTGCATTGATCACAGCTGTCCATCTGGACGTTTAGTCAGCACGGACAAAGTACTGAGAT	TATTGATCCCAGCTGTCCATCTGAATTGATCACAGCTGCCCATCTGTATTGATCGCAGCTGGCCATCTGCATTGATCACAGCTGTCCATCTGGACGTTTA	cat4		N	ATTGATC,CAGCTG,CCATCTG-4-1	2902	2053	1056	1382	4240	4315	2923	2818	56	9	1	244	328	259
ATCGAAAGGATGGGAGTACTAAGCTTCTCAGCACCATTTGTGTATCAGCTGTAGGAAAATGGTCACTGAATCAGATGGGGTAGCCTGACTTTGTCCTTAATCAATGTCTTTCCCCAAGACGTTTAGTCAGCACGGACAAAGTACTGAGAT	TCTCAGCACCATTTGTGTATCAGCTGTAGGAAAATGGTCACTGAATCAGATGGGGTAGCCTGACTTTGTCCTTAATCAATGTCTTTCCCCAAGACGTTTA	cat4		N	CAGCTG,CAGATGG,AATCAAT-1-20	3121	1974	1663	1119	3219	3485	1869	2391	2370	2428	1692	1465	1348	1528
ATCGAAAGGATGGGAGTACTAAGCTTCTCAGCACCATTTGTGTACAGCTGATAGGAAAATGGTCACTGAAATCAATCAGGTAGCCTGACTTTGTCAAATCAATGTGTCTTTCCCCAAGACGTTTAGTCAGCACGGACAAAGTACTGAGAT	TCTCAGCACCATTTGTGTACAGCTGATAGGAAAATGGTCACTGAAATCAATCAGGTAGCCTGACTTTGTCAAATCAATGTGTCTTTCCCCAAGACGTTTA	cat4		N	CAGCTG,AATCAAT,AAATCAAT-1-19	2587	1925	1765	2359	3299	3660	2428	2217	2572	2150	3065	2627	1648	1866
ATCGAAAGGATGGGAGTACTAAGCTTTCCATCACAATCAATGAATCAATGTCCATCAAAATCAATCAATCAATGTCCATCAAAATCAATTAATCAATTTCCATCAGAATCAATCAATCAATTTTAGTCAGCACGGACAAAGTACTGAGAT	TTCCATCACAATCAATGAATCAATGTCCATCAAAATCAATCAATCAATGTCCATCAAAATCAATTAATCAATTTCCATCAGAATCAATCAATCAATTTTA	cat4		N	TCCATCA,AATCAAT,AATCAAT-4-1	605	604	323	322	1940	1565	1047	1133	491	769	438	1044	1156	1320
ATCGAAAGGATGGGAGTACTAAGCTTCTCAGCATCCATCATGTATGGGATCAATAAAAATGGTTATTGATTTTGAGCAGTCCATCAGACTTTGTATCAATACAGTGTCTTATTGATTGACGTTTAGTCAGCACGGACAAAGTACTGAGAT	TCTCAGCATCCATCATGTATGGGATCAATAAAAATGGTTATTGATTTTGAGCAGTCCATCAGACTTTGTATCAATACAGTGTCTTATTGATTGACGTTTA	cat4		N	TCCATCA,ATCAATA,TATTGATT-2-8	5640	3842	2877	2967	3066	3800	1812	2128	450	391	563	425	219	233
ATCGAAAGGATGGGAGTACTAAGCTTATTGATCCAATCAATGAATCAATGATTGATCAAATCAATCAATCAATGATTGATCAAATCAATTAATCAATTATTGATCGAATCAATCAATCAATTTTAGTCAGCACGGACAAAGTACTGAGAT	TATTGATCCAATCAATGAATCAATGATTGATCAAATCAATCAATCAATGATTGATCAAATCAATTAATCAATTATTGATCGAATCAATCAATCAATTTTA	cat4		N	ATTGATC,AATCAAT,AATCAAT-4-1	743	339	235	151	1832	2158	544	1376	0	0	1	0	0	0
ATCGAAAGGATGGGAGTACTAAGCTTCCATCATCCATCAAAATCAATTCCATCATCCATCAAAATCAATTCCATCATCCATCAAAATCAATTCCATCATCCATCAAAATCAATCCAAGACGTTTAGTCAGCACGGACAAAGTACTGAGAT	TCCATCATCCATCAAAATCAATTCCATCATCCATCAAAATCAATTCCATCATCCATCAAAATCAATTCCATCATCCATCAAAATCAATCCAAGACGTTTA	cat4		N	TCCATCA,TCCATCA,AAATCAAT-4-0	864	568	608	543	1551	1596	1280	1452	672	474	799	663	606	601
ATCGAAAGGATGGGAGTACTAAGCTTCTCAGCACCATTTGTGTATCAGCTGTAGGAAAATGGTCACTGAATTCCATCAGGTAGCCTGACTTTGTCCTTATCAATTGTCTTTCCCCAAGACGTTTAGTCAGCACGGACAAAGTACTGAGAT	TCTCAGCACCATTTGTGTATCAGCTGTAGGAAAATGGTCACTGAATTCCATCAGGTAGCCTGACTTTGTCCTTATCAATTGTCTTTCCCCAAGACGTTTA	cat4		N	CAGCTG,TCCATCA,ATCAAT-1-20	3808	3204	2244	3777	7182	7779	3713	6327	3409	2550	3400	6177	3359	3552
ATCGAAAGGATGGGAGTACTAAGCTTCTCAGCACCATTTGTGTATCAGCTGTAGGAAAATGGTCACTGAATCAGCTGAGGTAGCCTGACTTTGTCCTAAATCAATGTCTTTCCCCAAGACGTTTAGTCAGCACGGACAAAGTACTGAGAT	TCTCAGCACCATTTGTGTATCAGCTGTAGGAAAATGGTCACTGAATCAGCTGAGGTAGCCTGACTTTGTCCTAAATCAATGTCTTTCCCCAAGACGTTTA	cat4		N	CAGCTG,CAGCTG,AAATCAAT-1-20	3424	2723	1706	3082	4776	5151	3551	4792	2912	2915	2726	4204	2308	2347
ATCGAAAGGATGGGAGTACTAAGCTTCTCAGCACCATTTGTGTATCCATCATAGGAAAATGGTCACTGAACCATCTGAGGTAGCCTGACTTTGTCCCCATCTGGTGTCTTTCCCCAAGACGTTTAGTCAGCACGGACAAAGTACTGAGAT	TCTCAGCACCATTTGTGTATCCATCATAGGAAAATGGTCACTGAACCATCTGAGGTAGCCTGACTTTGTCCCCATCTGGTGTCTTTCCCCAAGACGTTTA	cat4		N	TCCATCA,CCATCTG,CCATCTG-1-19	3070	2525	1318	2736	4382	4909	2939	3705	2889	2650	2207	2878	1826	1831
ATCGAAAGGATGGGAGTACTAAGCTTCTCAGCACCATTTGTGTATCAGCTGTAGGAAAATGGTCACTGAATCAGATGGGGTAGCCTGACTTTGTCCTTCAGATGGGTCTTTCCCCAAGACGTTTAGTCAGCACGGACAAAGTACTGAGAT	TCTCAGCACCATTTGTGTATCAGCTGTAGGAAAATGGTCACTGAATCAGATGGGGTAGCCTGACTTTGTCCTTCAGATGGGTCTTTCCCCAAGACGTTTA	cat4		N	CAGCTG,CAGATGG,CAGATGG-1-20	4155	3764	2569	3624	4542	4886	2794	2645	3420	3010	2614	4167	1848	2059
ATCGAAAGGATGGGAGTACTAAGCTTCTCAGCAATCAATGTGTATGTATTGATTGAAAATGTATTGATTATTTGAGAATCAATCCTGACTTATTGATTCAACAGTTATTGATTCCAAGACGTTTAGTCAGCACGGACAAAGTACTGAGAT	TCTCAGCAATCAATGTGTATGTATTGATTGAAAATGTATTGATTATTTGAGAATCAATCCTGACTTATTGATTCAACAGTTATTGATTCCAAGACGTTTA	cat4		N	AATCAAT,TATTGATT,TATTGATT-2-7	1190	377	144	438	2010	2750	929	2754	545	351	167	436	1254	854
ATCGAAAGGATGGGAGTACTAAGCTTAATCAATCAATCAATGAATCAATGAATCAATAAATCAATCAATCAATGAATCAATAAATCAATTAATCAATTAATCAATGAATCAATCAATCAATTTTAGTCAGCACGGACAAAGTACTGAGAT	TAATCAATCAATCAATGAATCAATGAATCAATAAATCAATCAATCAATGAATCAATAAATCAATTAATCAATTAATCAATGAATCAATCAATCAATTTTA	cat4		N	AATCAAT,AATCAAT,AATCAAT-4-1	1056	1	0	1	4	252	5	32	123	126	585	337	50	46
ATCGAAAGGATGGGAGTACTAAGCTTCTCAGCACCATTTGTGTACAGCTGATAGGAAAATGGTCACTGATCCATCACAGGTAGCCTGACTTTGTCTATTGATTGTGTCTTTCCCCAAGACGTTTAGTCAGCACGGACAAAGTACTGAGAT	TCTCAGCACCATTTGTGTACAGCTGATAGGAAAATGGTCACTGATCCATCACAGGTAGCCTGACTTTGTCTATTGATTGTGTCTTTCCCCAAGACGTTTA	cat4		N	CAGCTG,TCCATCA,TATTGATT-1-19	4687	3032	2651	4859	5531	5987	7856	9095	1901	1761	1247	1672	950	934
ATCGAAAGGATGGGAGTACTAAGCTTCTCAGCAATTGATCTGTATGGGATTGATCAAAATGGTTCCATCATTTGAGCAATTGATCTGACTTTGATTGATCACAGTGTCTCCATCAAAGACGTTTAGTCAGCACGGACAAAGTACTGAGAT	TCTCAGCAATTGATCTGTATGGGATTGATCAAAATGGTTCCATCATTTGAGCAATTGATCTGACTTTGATTGATCACAGTGTCTCCATCAAAGACGTTTA	cat4		N	ATTGATC,ATTGATC,TCCATCA-2-8	3169	2254	2130	2620	3138	3415	1542	1774	124	203	520	217	32	14
ATCGAAAGGATGGGAGTACTAAGCTATTGATCAATCAATAAATCAATATTGATCAATCAATAAATCAATATTGATCAATCAATAAATCAATATTGATCAATCAATAAATCAATCCAAGACGTTTAGTCAGCACGGACAAAGTACTGAGAT	ATTGATCAATCAATAAATCAATATTGATCAATCAATAAATCAATATTGATCAATCAATAAATCAATATTGATCAATCAATAAATCAATCCAAGACGTTTA	cat4		N	ATTGATC,AATCAAT,AAATCAAT-4-0	383	0	0	0	1	240	4	91	0	0	1	0	0	0
ATCGAAAGGATGGGAGTACTAAGCTTCTCAGCACCATTTGTGTAATCAATATAGGAAAATGGTCACTGAACCATCTGAGGTAGCCTGACTTTGTCCTATTGATTTGTCTTTCCCCAAGACGTTTAGTCAGCACGGACAAAGTACTGAGAT	TCTCAGCACCATTTGTGTAATCAATATAGGAAAATGGTCACTGAACCATCTGAGGTAGCCTGACTTTGTCCTATTGATTTGTCTTTCCCCAAGACGTTTA	cat4		N	ATCAATA,CCATCTG,TATTGATT-1-19	3324	2128	2351	3981	2997	3363	1338	1998	2428	1734	3426	4028	1274	1376
ATCGAAAGGATGGGAGTACTAAGCTTCTCAGCACCATTTGTGTACCATCTGTAGGAAAATGGTCACTGAAAATCAATAGGTAGCCTGACTTTGTCCAAATCAATTGTCTTTCCCCAAGACGTTTAGTCAGCACGGACAAAGTACTGAGAT	TCTCAGCACCATTTGTGTACCATCTGTAGGAAAATGGTCACTGAAAATCAATAGGTAGCCTGACTTTGTCCAAATCAATTGTCTTTCCCCAAGACGTTTA	cat4		N	CCATCTG,AATCAAT,AAATCAAT-1-19	2597	1505	1146	1763	3567	3604	2320	1962	2395	1984	2254	2947	1582	1723
ATCGAAAGGATGGGAGTACTAAGCTTCTCAGCACCATTTGTGTATCCATCATAGGAAAATGGTCACTGAAATCAATCAGGTAGCCTGACTTTGTCAAATCAATGTGTCTTTCCCCAAGACGTTTAGTCAGCACGGACAAAGTACTGAGAT	TCTCAGCACCATTTGTGTATCCATCATAGGAAAATGGTCACTGAAATCAATCAGGTAGCCTGACTTTGTCAAATCAATGTGTCTTTCCCCAAGACGTTTA	cat4		N	TCCATCA,ATCAAT,AAATCAAT-1-19	2118	1692	2447	1945	4692	4874	3034	3777	1776	1449	4628	2397	2033	2010
ATCGAAAGGATGGGAGTACTAAGCTTCTCAGCACAGCTGGTGTATGGATCAATAGAAAATGGAATCAATATTTGAGCCAGCTGCCTGACTTATCAATACAACAGTGAATCAATCCAAGACGTTTAGTCAGCACGGACAAAGTACTGAGAT	TCTCAGCACAGCTGGTGTATGGATCAATAGAAAATGGAATCAATATTTGAGCCAGCTGCCTGACTTATCAATACAACAGTGAATCAATCCAAGACGTTTA	cat4		N	CAGCTG,ATCAATA,AATCAAT-2-8	921	281	224	856	1478	1717	864	1100	111	225	61	284	360	515
ATCGAAAGGATGGGAGTACTAAGCTATTGATCCCATCTGTATTGATTATTGATCCCATCTGTATTGATTATTGATCCCATCTGTATTGATTATTGATCCCATCTGTATTGATTCCAAGACGTTTAGTCAGCACGGACAAAGTACTGAGAT	ATTGATCCCATCTGTATTGATTATTGATCCCATCTGTATTGATTATTGATCCCATCTGTATTGATTATTGATCCCATCTGTATTGATTCCAAGACGTTTA	cat4		N	ATTGATC,CCATCTG,TATTGATT-4-0	978	820	706	1340	1600	1588	600	657	0	0	2	0	0	0
ATCGAAAGGATGGGAGTACTAAGCTTCTCAGCATCCATCATGTATGGGATCAATAAAAATGGTATCAATATTTGAGCTCCATCACTGACTTTATCAATAAACAGTGTATCAATCCAAGACGTTTAGTCAGCACGGACAAAGTACTGAGAT	TCTCAGCATCCATCATGTATGGGATCAATAAAAATGGTATCAATATTTGAGCTCCATCACTGACTTTATCAATAAACAGTGTATCAATCCAAGACGTTTA	cat4		N	TCCATCA,ATCAATA,ATCAAT-2-8	842	518	188	250	2397	2586	901	1959	50	53	201	2	319	245
ATCGAAAGGATGGGAGTACTAAGCTTATTGATCCATCAATAGAATCAATGATTGATCAATCAATACAATCAATGATTGATCAATCAATATAATCAATTATTGATCGATCAATACAATCAATTTTAGTCAGCACGGACAAAGTACTGAGAT	TATTGATCCATCAATAGAATCAATGATTGATCAATCAATACAATCAATGATTGATCAATCAATATAATCAATTATTGATCGATCAATACAATCAATTTTA	cat4		N	ATTGATC,ATCAATA,AATCAAT-4-1	884	53	176	146	414	902	403	660	0	0	1	0	0	0
ATCGAAAGGATGGGAGTACTAAGCTTCTCAGCAATTGATCTGTATGGGATTGATCAAAATGGTATTGATCTTTGAGCAATTGATCTGACTTTGATTGATCACAGTGTCATTGATCAAGACGTTTAGTCAGCACGGACAAAGTACTGAGAT	TCTCAGCAATTGATCTGTATGGGATTGATCAAAATGGTATTGATCTTTGAGCAATTGATCTGACTTTGATTGATCACAGTGTCATTGATCAAGACGTTTA	cat4		N	ATTGATC,ATTGATC,ATTGATC-2-8	3657	2245	3545	2257	5209	5532	1812	2453	125	3	7	0	4	25
ATCGAAAGGATGGGAGTACTAAGCTATCAATAAAATCAATAAATCAATATCAATAAAATCAATAAATCAATATCAATAAAATCAATAAATCAATATCAATAAAATCAATAAATCAATGACGTTTAGTCAGCACGGACAAAGTACTGAGAT	ATCAATAAAATCAATAAATCAATATCAATAAAATCAATAAATCAATATCAATAAAATCAATAAATCAATATCAATAAAATCAATAAATCAATGACGTTTA	cat4		N	ATCAATA,AAATCAAT,AAATCAAT-4-0	0	0	0	0	0	0	0	0	0	0	0	0	0	0
ATCGAAAGGATGGGAGTACTAAGCTTCTCAGCACAGCTGGTGTATGGCAGATGGGAAAATGGCAGATGGATTTGAGCCAGCTGCCTGACTTCAGATGGCAACAGTGCAGATGGCCAAGACGTTTAGTCAGCACGGACAAAGTACTGAGAT	TCTCAGCACAGCTGGTGTATGGCAGATGGGAAAATGGCAGATGGATTTGAGCCAGCTGCCTGACTTCAGATGGCAACAGTGCAGATGGCCAAGACGTTTA	cat4		N	CAGCTG,CAGATGG,CAGATGG-2-8	4078	3342	1959	3404	1467	2041	968	1033	3606	3327	3325	4152	1783	2217
ATCGAAAGGATGGGAGTACTAAGCTTCTCAGCACCATTTGTGTACAGATGGTAGGAAAATGGTCACTGAATCCATCAAGGTAGCCTGACTTTGTCCTCCATCAGTGTCTTTCCCCAAGACGTTTAGTCAGCACGGACAAAGTACTGAGAT	TCTCAGCACCATTTGTGTACAGATGGTAGGAAAATGGTCACTGAATCCATCAAGGTAGCCTGACTTTGTCCTCCATCAGTGTCTTTCCCCAAGACGTTTA	cat4		N	CAGATGG,TCCATCA,TCCATCA-1-19	2060	1976	2195	2841	3914	4447	1821	3124	2296	2158	3770	3975	1877	2222
ATCGAAAGGATGGGAGTACTAAGCTTCTCAGCACCATTTGTGTACAGATGGTAGGAAAATGGTCACTGAACCATCTGAGGTAGCCTGACTTTGTCCCCATCTGGTGTCTTTCCCCAAGACGTTTAGTCAGCACGGACAAAGTACTGAGAT	TCTCAGCACCATTTGTGTACAGATGGTAGGAAAATGGTCACTGAACCATCTGAGGTAGCCTGACTTTGTCCCCATCTGGTGTCTTTCCCCAAGACGTTTA	cat4		N	CAGATGG,CCATCTG,CCATCTG-1-19	2441	2306	1168	1641	4201	4879	1992	2140	1755	1406	1795	1887	2659	2855
ATCGAAAGGATGGGAGTACTAAGCTATTGATCAAATCAATAAATCAATATTGATCAAATCAATAAATCAATATTGATCAAATCAATAAATCAATATTGATCAAATCAATAAATCAATGACGTTTAGTCAGCACGGACAAAGTACTGAGAT	ATTGATCAAATCAATAAATCAATATTGATCAAATCAATAAATCAATATTGATCAAATCAATAAATCAATATTGATCAAATCAATAAATCAATGACGTTTA	cat4		N	ATTGATC,AAATCAAT,AAATCAAT-4-0	791	0	0	1	1	127	4	311	0	0	0	0	0	0
ATCGAAAGGATGGGAGTACTAAGCTTCAGCTGAATCAATGAAATCAATACAGCTGAATCAATTAAATCAATTCAGCTGGATCAATTAAATCAATCCAGCTGCATCAATTAAATCAATGACGTTTAGTCAGCACGGACAAAGTACTGAGAT	TCAGCTGAATCAATGAAATCAATACAGCTGAATCAATTAAATCAATTCAGCTGGATCAATTAAATCAATCCAGCTGCATCAATTAAATCAATGACGTTTA	cat4		N	CAGCTG,ATCAAT,AAATCAAT-4-1	918	827	614	1327	836	1084	458	691	222	237	106	58	63	75
ATCGAAAGGATGGGAGTACTAAGCTTCTCAGCACCATTTGTGTATCCATCATAGGAAAATGGTCACTGAAAATCAATAGGTAGCCTGACTTTGTCCAAATCAATTGTCTTTCCCCAAGACGTTTAGTCAGCACGGACAAAGTACTGAGAT	TCTCAGCACCATTTGTGTATCCATCATAGGAAAATGGTCACTGAAAATCAATAGGTAGCCTGACTTTGTCCAAATCAATTGTCTTTCCCCAAGACGTTTA	cat4		N	TCCATCA,AATCAAT,AAATCAAT-1-19	2404	2378	1639	2374	4605	4817	2213	3983	2056	2121	3093	3864	2210	2083
ATCGAAAGGATGGGAGTACTAAGCTTCTCAGCACCATTTGTGTATCAGCTGTAGGAAAATGGTCACTGAATATCAATAGGTAGCCTGACTTTGTCCTAATCAATTGTCTTTCCCCAAGACGTTTAGTCAGCACGGACAAAGTACTGAGAT	TCTCAGCACCATTTGTGTATCAGCTGTAGGAAAATGGTCACTGAATATCAATAGGTAGCCTGACTTTGTCCTAATCAATTGTCTTTCCCCAAGACGTTTA	cat4		N	CAGCTG,ATCAAT,AATCAAT-1-20	4100	2892	1684	2644	3658	4122	2211	3520	2776	2513	2901	2350	1864	2096
ATCGAAAGGATGGGAGTACTAAGCTTCAGATGGCATCAATTTATTGATTGCAGATGGAATCAATATATTGATTGCAGATGGAATCAATCTATTGATTTCAGATGGGATCAATCTATTGATTTTTAGTCAGCACGGACAAAGTACTGAGAT	TCAGATGGCATCAATTTATTGATTGCAGATGGAATCAATATATTGATTGCAGATGGAATCAATCTATTGATTTCAGATGGGATCAATCTATTGATTTTTA	cat4		N	CAGATGG,ATCAAT,TATTGATT-4-1	1204	701	163	421	2285	2370	954	2336	37	3	1	0	14	50
ATCGAAAGGATGGGAGTACTAAGCTTATCAATACATCAATAGATCAATAATCAATAAATCAATAAATCAATTATCAATAGATCAATAAATCAATCATCAATAAATCAATATATCAATGACGTTTAGTCAGCACGGACAAAGTACTGAGAT	TATCAATACATCAATAGATCAATAATCAATAAATCAATAAATCAATTATCAATAGATCAATAAATCAATCATCAATAAATCAATATATCAATGACGTTTA	cat4		N	ATCAATA,ATCAATA,ATCAAT-4-1	66	0	0	0	1	3	0	1	0	0	0	1	0	0
ATCGAAAGGATGGGAGTACTAAGCTTCTCAGCACCATTTGTGTAATTGATCTAGGAAAATGGTCACTGAACCATCTGAGGTAGCCTGACTTTGTCCTATTGATTTGTCTTTCCCCAAGACGTTTAGTCAGCACGGACAAAGTACTGAGAT	TCTCAGCACCATTTGTGTAATTGATCTAGGAAAATGGTCACTGAACCATCTGAGGTAGCCTGACTTTGTCCTATTGATTTGTCTTTCCCCAAGACGTTTA	cat4		N	ATTGATC,CCATCTG,TATTGATT-1-19	5224	3672	2753	4094	5744	6339	4737	5625	1033	699	366	566	828	993
ATCGAAAGGATGGGAGTACTAAGCTTCTCAGCAATTGATCTGTATGGGCAGATGGAAAATGGTATCAATATTTGAGCAATTGATCTGACTTTGCAGATGGACAGTGTCATCAATAAAGACGTTTAGTCAGCACGGACAAAGTACTGAGAT	TCTCAGCAATTGATCTGTATGGGCAGATGGAAAATGGTATCAATATTTGAGCAATTGATCTGACTTTGCAGATGGACAGTGTCATCAATAAAGACGTTTA	cat4		N	ATTGATC,CAGATGG,ATCAATA-2-8	1473	923	640	986	2664	3375	1083	1206	27	43	1	104	49	84
ATCGAAAGGATGGGAGTACTAAGCTTCTCAGCAATCAATGTGTATGGCCATCTGGAAAATGGCCATCTGATTTGAGCATCAATCCTGACTTCCATCTGCAACAGTGCCATCTGCCAAGACGTTTAGTCAGCACGGACAAAGTACTGAGAT	TCTCAGCAATCAATGTGTATGGCCATCTGGAAAATGGCCATCTGATTTGAGCATCAATCCTGACTTCCATCTGCAACAGTGCCATCTGCCAAGACGTTTA	cat4		N	ATCAAT,CCATCTG,CCATCTG-2-8	2762	1865	1248	1442	4229	4682	3013	2726	1973	1817	2452	1810	2288	1977
ATCGAAAGGATGGGAGTACTAAGCTTATTGATCCTCCATCAGATCAATAGATTGATCATCCATCACATCAATAGATTGATCATCCATCATATCAATATATTGATCGTCCATCACATCAATATTTAGTCAGCACGGACAAAGTACTGAGAT	TATTGATCCTCCATCAGATCAATAGATTGATCATCCATCACATCAATAGATTGATCATCCATCATATCAATATATTGATCGTCCATCACATCAATATTTA	cat4		N	ATTGATC,TCCATCA,ATCAATA-4-1	1463	870	1170	1460	3054	3269	1500	1742	0	0	4	0	0	0
ATCGAAAGGATGGGAGTACTAAGCTTCTCAGCACCATTTGTGTACAGCTGATAGGAAAATGGTCACTGACAGATGGCAGGTAGCCTGACTTTGTCAAATCAATGTGTCTTTCCCCAAGACGTTTAGTCAGCACGGACAAAGTACTGAGAT	TCTCAGCACCATTTGTGTACAGCTGATAGGAAAATGGTCACTGACAGATGGCAGGTAGCCTGACTTTGTCAAATCAATGTGTCTTTCCCCAAGACGTTTA	cat4		N	CAGCTG,CAGATGG,AAATCAAT-1-19	3448	2594	2623	4638	2801	3042	1806	2667	3811	2832	5457	7564	2343	2432
ATCGAAAGGATGGGAGTACTAAGCTTCTCAGCACCATTTGTGTAATTGATCTAGGAAAATGGTCACTGAACCATCTGAGGTAGCCTGACTTTGTCCAAATCAATTGTCTTTCCCCAAGACGTTTAGTCAGCACGGACAAAGTACTGAGAT	TCTCAGCACCATTTGTGTAATTGATCTAGGAAAATGGTCACTGAACCATCTGAGGTAGCCTGACTTTGTCCAAATCAATTGTCTTTCCCCAAGACGTTTA	cat4		N	ATTGATC,CCATCTG,AAATCAAT-1-19	3665	2625	2426	3396	3081	3162	2243	2034	878	876	341	382	539	353
ATCGAAAGGATGGGAGTACTAAGCTTCTCAGCACCATTTGTGTATCCATCATAGGAAAATGGTCACTGAAATCAATAAGGTAGCCTGACTTTGTCCAAATCAATTGTCTTTCCCCAAGACGTTTAGTCAGCACGGACAAAGTACTGAGAT	TCTCAGCACCATTTGTGTATCCATCATAGGAAAATGGTCACTGAAATCAATAAGGTAGCCTGACTTTGTCCAAATCAATTGTCTTTCCCCAAGACGTTTA	cat4		N	TCCATCA,ATCAATA,AAATCAAT-1-19	3241	2515	2121	2180	3016	3174	1297	1780	2597	2031	4273	2664	1125	1657
ATCGAAAGGATGGGAGTACTAAGCTTCTCAGCACCATTTGTGTATCAGCTGTAGGAAAATGGTCACTGAATCAGCTGAGGTAGCCTGACTTTGTCCTATCAATATGTCTTTCCCCAAGACGTTTAGTCAGCACGGACAAAGTACTGAGAT	TCTCAGCACCATTTGTGTATCAGCTGTAGGAAAATGGTCACTGAATCAGCTGAGGTAGCCTGACTTTGTCCTATCAATATGTCTTTCCCCAAGACGTTTA	cat4		N	CAGCTG,CAGCTG,ATCAATA-1-20	2626	1786	1333	1589	5383	6059	3794	4239	1730	1502	3848	2812	2674	2919
ATCGAAAGGATGGGAGTACTAAGCTATCAATATATTGATTTATTGATTATCAATATATTGATTTATTGATTATCAATATATTGATTTATTGATTATCAATATATTGATTTATTGATTGACGTTTAGTCAGCACGGACAAAGTACTGAGAT	ATCAATATATTGATTTATTGATTATCAATATATTGATTTATTGATTATCAATATATTGATTTATTGATTATCAATATATTGATTTATTGATTGACGTTTA	cat4		N	ATCAATA,TATTGATT,TATTGATT-4-0	0	0	0	0	0	0	0	0	0	0	0	0	0	0
ATCGAAAGGATGGGAGTACTAAGCTTCTCAGCACAGCTGGTGTATGGCAGCTGGGAAAATGCCATCTGAATTTGAGCAGCTGGCCTGACTCAGCTGTTCAACAGCCATCTGCCCCAAGACGTTTAGTCAGCACGGACAAAGTACTGAGAT	TCTCAGCACAGCTGGTGTATGGCAGCTGGGAAAATGCCATCTGAATTTGAGCAGCTGGCCTGACTCAGCTGTTCAACAGCCATCTGCCCCAAGACGTTTA	cat4		N	CAGCTG,CAGCTG,CCATCTG-2-8	5389	4456	5224	7694	2873	3011	2423	2363	5151	3831	12422	9741	4708	4875
ATCGAAAGGATGGGAGTACTAAGCTTCTCAGCACCATTTGTGTAATTGATCTAGGAAAATGGTCACTGAAAATCAATAGGTAGCCTGACTTTGTCCAATCAATGTGTCTTTCCCCAAGACGTTTAGTCAGCACGGACAAAGTACTGAGAT	TCTCAGCACCATTTGTGTAATTGATCTAGGAAAATGGTCACTGAAAATCAATAGGTAGCCTGACTTTGTCCAATCAATGTGTCTTTCCCCAAGACGTTTA	cat4		N	ATTGATC,AATCAAT,AATCAAT-1-19	1291	950	561	647	3196	3357	1350	1804	185	387	304	1	373	499
ATCGAAAGGATGGGAGTACTAAGCTTCTCAGCACCATTTGTGTACAGATGGTAGGAAAATGGTCACTGAACAGATGGAGGTAGCCTGACTTTGTCCCCATCTGGTGTCTTTCCCCAAGACGTTTAGTCAGCACGGACAAAGTACTGAGAT	TCTCAGCACCATTTGTGTACAGATGGTAGGAAAATGGTCACTGAACAGATGGAGGTAGCCTGACTTTGTCCCCATCTGGTGTCTTTCCCCAAGACGTTTA	cat4		N	CAGATGG,CAGATGG,CCATCTG-1-19	3647	2893	2194	3173	3490	3925	2172	2552	3319	2704	3138	3035	3351	4014
ATCGAAAGGATGGGAGTACTAAGCTTCTCAGCACAGCTGGTGTATGGATCAATAGAAAATGGTATTGATTTTTGAGCACAGCTGCTGACTTTATCAATAAACAGTGTTATTGATTAAGACGTTTAGTCAGCACGGACAAAGTACTGAGAT	TCTCAGCACAGCTGGTGTATGGATCAATAGAAAATGGTATTGATTTTTGAGCACAGCTGCTGACTTTATCAATAAACAGTGTTATTGATTAAGACGTTTA	cat4		N	CAGCTG,ATCAATA,TATTGATT-2-8	2005	1670	1105	1160	1381	1554	940	999	1090	640	989	512	515	674
ATCGAAAGGATGGGAGTACTAAGCTTCTCAGCACAGATGGTGTATGGGCAGATGGAAAATGGTCAGATGGTTTGAGCACAGATGGTGACTTTGCAGATGGACAGTGTCCAGATGGAAGACGTTTAGTCAGCACGGACAAAGTACTGAGAT	TCTCAGCACAGATGGTGTATGGGCAGATGGAAAATGGTCAGATGGTTTGAGCACAGATGGTGACTTTGCAGATGGACAGTGTCCAGATGGAAGACGTTTA	cat4		N	CAGATGG,CAGATGG,CAGATGG-2-8	3807	3034	3440	4710	2008	2081	1168	1940	2761	2235	5977	6688	2470	2695
ATCGAAAGGATGGGAGTACTAAGCTTCTCAGCACCATTTGTGTAATTGATCTAGGAAAATGGTCACTGAAATCAATAAGGTAGCCTGACTTTGTCCATCAATAGTGTCTTTCCCCAAGACGTTTAGTCAGCACGGACAAAGTACTGAGAT	TCTCAGCACCATTTGTGTAATTGATCTAGGAAAATGGTCACTGAAATCAATAAGGTAGCCTGACTTTGTCCATCAATAGTGTCTTTCCCCAAGACGTTTA	cat4		N	ATTGATC,ATCAATA,ATCAATA-1-19	2348	1668	2693	1825	4742	5057	2709	3189	376	348	390	237	412	619
ATCGAAAGGATGGGAGTACTAAGCTTCTCAGCACCATTTGTGTATTCCATCAAGGAAAATGGTCACTGAATTATCAATAGTAGCCTGACTTTGTCCTTCATCAATGTCTTTCCCCAAGACGTTTAGTCAGCACGGACAAAGTACTGAGAT	TCTCAGCACCATTTGTGTATTCCATCAAGGAAAATGGTCACTGAATTATCAATAGTAGCCTGACTTTGTCCTTCATCAATGTCTTTCCCCAAGACGTTTA	cat4		N	TCCATCA,ATCAATA,ATCAAT-1-20	3499	1847	1185	2592	5747	6496	4050	5129	2700	1542	2738	2937	2520	2445
ATCGAAAGGATGGGAGTACTAAGCTTCTCAGCACCATTTGTGTAATCAATATAGGAAAATGGTCACTGAAAATCAATAGGTAGCCTGACTTTGTCCTATTGATTTGTCTTTCCCCAAGACGTTTAGTCAGCACGGACAAAGTACTGAGAT	TCTCAGCACCATTTGTGTAATCAATATAGGAAAATGGTCACTGAAAATCAATAGGTAGCCTGACTTTGTCCTATTGATTTGTCTTTCCCCAAGACGTTTA	cat4		N	ATCAATA,AATCAAT,TATTGATT-1-19	3152	2423	1641	1924	3101	3337	1186	2080	2049	1898	3192	3086	1138	1256
ATCGAAAGGATGGGAGTACTAAGCTTCTCAGCACCATTTGTGTATCAGCTGTAGGAAAATGGTCACTGAATAATCAATGGTAGCCTGACTTTGTCCTTAATCAATGTCTTTCCCCAAGACGTTTAGTCAGCACGGACAAAGTACTGAGAT	TCTCAGCACCATTTGTGTATCAGCTGTAGGAAAATGGTCACTGAATAATCAATGGTAGCCTGACTTTGTCCTTAATCAATGTCTTTCCCCAAGACGTTTA	cat4		N	CAGCTG,AATCAAT,AATCAAT-1-20	3671	2963	2315	2272	4618	5522	3095	3558	3711	3179	3529	3809	2767	3266
ATCGAAAGGATGGGAGTACTAAGCTTCTCAGCACCATTTGTGTACCATCTGTAGGAAAATGGTCACTGAATATTGATTGGTAGCCTGACTTTGTCCTAAATCAATGTCTTTCCCCAAGACGTTTAGTCAGCACGGACAAAGTACTGAGAT	TCTCAGCACCATTTGTGTACCATCTGTAGGAAAATGGTCACTGAATATTGATTGGTAGCCTGACTTTGTCCTAAATCAATGTCTTTCCCCAAGACGTTTA	cat4		N	CCATCTG,TATTGATT,AAATCAAT-1-19	3012	2404	3112	2135	4548	4872	1786	2911	2007	1717	4435	2943	2246	2257
ATCGAAAGGATGGGAGTACTAAGCTTCTCAGCAATTGATCTGTATGGGATCAATAAAAATGGTCCATCTGTTTGAGCAATTGATCTGACTTTGATCAATAACAGTGTCCCATCTGAAGACGTTTAGTCAGCACGGACAAAGTACTGAGAT	TCTCAGCAATTGATCTGTATGGGATCAATAAAAATGGTCCATCTGTTTGAGCAATTGATCTGACTTTGATCAATAACAGTGTCCCATCTGAAGACGTTTA	cat4		N	ATTGATC,ATCAATA,CCATCTG-2-8	1619	854	684	1002	2623	2835	893	1348	101	176	97	0	52	76
ATCGAAAGGATGGGAGTACTAAGCTTCTCAGCACCATTTGTGTAATTGATCTAGGAAAATGGTCACTGAAATTGATCAGGTAGCCTGACTTTGTCCATTGATCGTGTCTTTCCCCAAGACGTTTAGTCAGCACGGACAAAGTACTGAGAT	TCTCAGCACCATTTGTGTAATTGATCTAGGAAAATGGTCACTGAAATTGATCAGGTAGCCTGACTTTGTCCATTGATCGTGTCTTTCCCCAAGACGTTTA	cat4		N	ATTGATC,ATTGATC,ATTGATC-1-19	4099	2979	1512	2572	4557	5068	2722	2750	127	195	2	0	26	29
ATCGAAAGGATGGGAGTACTAAGCTTCTCAGCACCATTTGTGTATCCATCATAGGAAAATGGTCACTGAATATTGATTGGTAGCCTGACTTTGTCCTAAATCAATGTCTTTCCCCAAGACGTTTAGTCAGCACGGACAAAGTACTGAGAT	TCTCAGCACCATTTGTGTATCCATCATAGGAAAATGGTCACTGAATATTGATTGGTAGCCTGACTTTGTCCTAAATCAATGTCTTTCCCCAAGACGTTTA	cat4		N	TCCATCA,TATTGATT,AAATCAAT-1-19	4224	3203	2913	4158	3209	3672	1332	2806	3072	2719	3397	3360	1375	1843
ATCGAAAGGATGGGAGTACTAAGCTTCTCAGCACCATTTGTGTACCATCTGTAGGAAAATGGTCACTGAACCATCTGAGGTAGCCTGACTTTGTCCCCATCTGGTGTCTTTCCCCAAGACGTTTAGTCAGCACGGACAAAGTACTGAGAT	TCTCAGCACCATTTGTGTACCATCTGTAGGAAAATGGTCACTGAACCATCTGAGGTAGCCTGACTTTGTCCCCATCTGGTGTCTTTCCCCAAGACGTTTA	cat4		N	CCATCTG,CCATCTG,CCATCTG-1-19	4691	4196	3046	4688	5380	5988	4344	4208	3181	2968	2672	4723	2727	2649
ATCGAAAGGATGGGAGTACTAAGCTTCTCAGCAATTGATCTGTATGGGCAGATGGAAAATGGTTATTGATTTTGAGCAGATTGATCGACTTTGTCAGATGGCAGTGTCTTATTGATTGACGTTTAGTCAGCACGGACAAAGTACTGAGAT	TCTCAGCAATTGATCTGTATGGGCAGATGGAAAATGGTTATTGATTTTGAGCAGATTGATCGACTTTGTCAGATGGCAGTGTCTTATTGATTGACGTTTA	cat4		N	ATTGATC,CAGATGG,TATTGATT-2-8	2730	2203	1928	2121	3238	3305	1102	1493	129	114	33	36	26	92
ATCGAAAGGATGGGAGTACTAAGCTTCTCAGCACCATTTGTGTATCCATCATAGGAAAATGGTCACTGAAAAATCAATGGTAGCCTGACTTTGTCCTAAATCAATGTCTTTCCCCAAGACGTTTAGTCAGCACGGACAAAGTACTGAGAT	TCTCAGCACCATTTGTGTATCCATCATAGGAAAATGGTCACTGAAAAATCAATGGTAGCCTGACTTTGTCCTAAATCAATGTCTTTCCCCAAGACGTTTA	cat4		N	TCCATCA,AAATCAAT,AAATCAAT-1-19	3327	2242	3128	3771	4110	4562	3128	3423	2629	2492	5114	5079	1608	1917
ATCGAAAGGATGGGAGTACTAAGCTTCTCAGCACCATTTGTGTAATTGATCTAGGAAAATGGTCACTGAATCCATCAAGGTAGCCTGACTTTGTCCAATCAATGTGTCTTTCCCCAAGACGTTTAGTCAGCACGGACAAAGTACTGAGAT	TCTCAGCACCATTTGTGTAATTGATCTAGGAAAATGGTCACTGAATCCATCAAGGTAGCCTGACTTTGTCCAATCAATGTGTCTTTCCCCAAGACGTTTA	cat4		N	ATTGATC,TCCATCA,AATCAAT-1-19	2957	2294	1386	1723	4070	4990	2619	3957	623	809	645	251	624	637
ATCGAAAGGATGGGAGTACTAAGCTTTCCATCACATCAATAGAATCAATGTCCATCAAATCAATACAATCAATGTCCATCAAATCAATATAATCAATTTCCATCAGATCAATACAATCAATTTTAGTCAGCACGGACAAAGTACTGAGAT	TTCCATCACATCAATAGAATCAATGTCCATCAAATCAATACAATCAATGTCCATCAAATCAATATAATCAATTTCCATCAGATCAATACAATCAATTTTA	cat4		N	TCCATCA,ATCAATA,AATCAAT-4-1	430	212	58	579	1307	1083	370	785	0	12	2	2	18	0
ATCGAAAGGATGGGAGTACTAAGCTTCTCAGCAATCAATATGTATGGGAATCAATAAAATGGTTATTGATTTTGAGCAGATCAATAGACTTTGTAATCAATCAGTGTCTTATTGATTGACGTTTAGTCAGCACGGACAAAGTACTGAGAT	TCTCAGCAATCAATATGTATGGGAATCAATAAAATGGTTATTGATTTTGAGCAGATCAATAGACTTTGTAATCAATCAGTGTCTTATTGATTGACGTTTA	cat4		N	ATCAATA,AATCAAT,TATTGATT-2-8	2734	1471	992	1522	2025	1895	1031	1424	156	86	99	138	46	32
ATCGAAAGGATGGGAGTACTAAGCTTCTCAGCACCATTTGTGTATCAGCTGTAGGAAAATGGTCACTGAATCAGATGGGGTAGCCTGACTTTGTCCTTATCAATAGTCTTTCCCCAAGACGTTTAGTCAGCACGGACAAAGTACTGAGAT	TCTCAGCACCATTTGTGTATCAGCTGTAGGAAAATGGTCACTGAATCAGATGGGGTAGCCTGACTTTGTCCTTATCAATAGTCTTTCCCCAAGACGTTTA	cat4		N	CAGCTG,CAGATGG,ATCAATA-1-20	4359	3496	3112	3480	3792	3991	2734	2438	3856	3527	5545	5809	2091	2112
ATCGAAAGGATGGGAGTACTAAGCTTATTGATCCCCATCTGGCCATCTGGATTGATCACCATCTGCCCATCTGGATTGATCACCATCTGTCCATCTGTATTGATCGCCATCTGCCCATCTGTTTAGTCAGCACGGACAAAGTACTGAGAT	TATTGATCCCCATCTGGCCATCTGGATTGATCACCATCTGCCCATCTGGATTGATCACCATCTGTCCATCTGTATTGATCGCCATCTGCCCATCTGTTTA	cat4		N	ATTGATC,CCATCTG,CCATCTG-4-1	3060	2100	1538	2255	1834	2210	1815	1754	1	0	2	3	611	574
ATCGAAAGGATGGGAGTACTAAGCTTCTCAGCTATTGATTTGTATGGTATTGATTAAAATGGTATTGATTTTTGAGCTATTGATTTGACTTTTATTGATTACAGTGTTATTGATTAAGACGTTTAGTCAGCACGGACAAAGTACTGAGAT	TCTCAGCTATTGATTTGTATGGTATTGATTAAAATGGTATTGATTTTTGAGCTATTGATTTGACTTTTATTGATTACAGTGTTATTGATTAAGACGTTTA	cat4		N	TATTGATT,TATTGATT,TATTGATT-2-7	808	222	718	440	1856	2491	464	1083	539	337	1442	242	498	711
ATCGAAAGGATGGGAGTACTAAGCTTCTCAGCACCATTTGTGTAATCAATATAGGAAAATGGTCACTGAAATCAATCAGGTAGCCTGACTTTGTCTATTGATTGTGTCTTTCCCCAAGACGTTTAGTCAGCACGGACAAAGTACTGAGAT	TCTCAGCACCATTTGTGTAATCAATATAGGAAAATGGTCACTGAAATCAATCAGGTAGCCTGACTTTGTCTATTGATTGTGTCTTTCCCCAAGACGTTTA	cat4		N	ATCAATA,ATCAAT,TATTGATT-1-19	2287	1772	2053	1865	4170	4415	2759	3699	1470	1336	3558	2689	1987	1677
ATCGAAAGGATGGGAGTACTAAGCTTCTCAGCACCATTTGTGTATTCCATCAAGGAAAATGGTCACTGAATTTCCATCAGTAGCCTGACTTTGTCCTTCATCAATGTCTTTCCCCAAGACGTTTAGTCAGCACGGACAAAGTACTGAGAT	TCTCAGCACCATTTGTGTATTCCATCAAGGAAAATGGTCACTGAATTTCCATCAGTAGCCTGACTTTGTCCTTCATCAATGTCTTTCCCCAAGACGTTTA	cat4		N	TCCATCA,TCCATCA,ATCAAT-1-20	4567	3370	3817	3765	5032	5520	2868	3025	3979	3190	6121	4677	3077	2692
ATCGAAAGGATGGGAGTACTAAGCTTATTGATTTATTGATTTATTGATTTATTGATTTATTGATTTATTGATTTATTGATTTATTGATTTATTGATTTATTGATTTATTGATTTATTGATTTTTAGTCAGCACGGACAAAGTACTGAGAT	TATTGATTTATTGATTTATTGATTTATTGATTTATTGATTTATTGATTTATTGATTTATTGATTTATTGATTTATTGATTTATTGATTTATTGATTTTTA	cat4		N	TATTGATT,TATTGATT,TATTGATT-4-0	0	0	0	0	0	0	0	0	0	0	0	0	0	0
ATCGAAAGGATGGGAGTACTAAGCTTCTCAGCAATTGATCTGTATGGGTCCATCAAAAATGGTATCAATATTTGAGCAATTGATCTGACTTTGTCCATCAACAGTGTCATCAATAAAGACGTTTAGTCAGCACGGACAAAGTACTGAGAT	TCTCAGCAATTGATCTGTATGGGTCCATCAAAAATGGTATCAATATTTGAGCAATTGATCTGACTTTGTCCATCAACAGTGTCATCAATAAAGACGTTTA	cat4		N	ATTGATC,TCCATCA,ATCAATA-2-8	3263	2538	2025	2146	2498	2730	1988	2372	0	99	111	96	52	25
ATCGAAAGGATGGGAGTACTAAGCTTCTCAGCACCATTTGTGTATATTGATCAGGAAAATGGTCACTGAATTATTGATCGTAGCCTGACTTTGTCCTTCATCAATGTCTTTCCCCAAGACGTTTAGTCAGCACGGACAAAGTACTGAGAT	TCTCAGCACCATTTGTGTATATTGATCAGGAAAATGGTCACTGAATTATTGATCGTAGCCTGACTTTGTCCTTCATCAATGTCTTTCCCCAAGACGTTTA	cat4		N	ATTGATC,ATTGATC,ATCAAT-1-20	2415	1360	2020	1556	4986	5820	2718	4223	83	0	4	2	84	158
ATCGAAAGGATGGGAGTACTAAGCTTCTCAGCAATCAATGTGTATGAAATCAATGAAAATGAAATCAATATTTGAGAATCAATCCTGACTAAATCAATCAACAGTAAATCAATCCAAGACGTTTAGTCAGCACGGACAAAGTACTGAGAT	TCTCAGCAATCAATGTGTATGAAATCAATGAAAATGAAATCAATATTTGAGAATCAATCCTGACTAAATCAATCAACAGTAAATCAATCCAAGACGTTTA	cat4		N	AATCAAT,AAATCAAT,AAATCAAT-2-7	1986	1417	1379	1023	2069	2590	4071	5353	1504	1031	2149	1618	935	1029
ATCGAAAGGATGGGAGTACTAAGCTTATCAATAATCAATGCCATCTGGATCAATGATCAATGCCATCTGAATCAATCATCAATCCCATCTGTATCAATCATCAATGCCATCTGCCAAGACGTTTAGTCAGCACGGACAAAGTACTGAGAT	TATCAATAATCAATGCCATCTGGATCAATGATCAATGCCATCTGAATCAATCATCAATCCCATCTGTATCAATCATCAATGCCATCTGCCAAGACGTTTA	cat4		N	ATCAAT,ATCAAT,CCATCTG-4-1	3242	2181	1321	1630	2750	2972	1410	2206	71	35	2	192	51	32
ATCGAAAGGATGGGAGTACTAAGCTTCTCAGCACCATTTGTGTATCAGCTGTAGGAAAATGGTCACTGAATATCAATAGGTAGCCTGACTTTGTCCTCCATCTGTGTCTTTCCCCAAGACGTTTAGTCAGCACGGACAAAGTACTGAGAT	TCTCAGCACCATTTGTGTATCAGCTGTAGGAAAATGGTCACTGAATATCAATAGGTAGCCTGACTTTGTCCTCCATCTGTGTCTTTCCCCAAGACGTTTA	cat4		N	CAGCTG,ATCAAT,CCATCTG-1-20	3500	2951	2655	3990	4289	4875	2616	3263	4193	2897	4305	5726	2758	3011
ATCGAAAGGATGGGAGTACTAAGCTTCTCAGCAAATCAATTGTATGGGAATCAATAAAATGGTAAATCAATTTGAGCAGAATCAATGACTTTGTAATCAATCAGTGTCTAAATCAATGACGTTTAGTCAGCACGGACAAAGTACTGAGAT	TCTCAGCAAATCAATTGTATGGGAATCAATAAAATGGTAAATCAATTTGAGCAGAATCAATGACTTTGTAATCAATCAGTGTCTAAATCAATGACGTTTA	cat4		N	AATCAAT,AATCAAT,AAATCAAT-2-8	1118	888	342	437	1122	1118	893	865	453	374	373	588	326	453
ATCGAAAGGATGGGAGTACTAAGCTTCAGCTGACCATCTGTAATCAATACAGCTGACCATCTGCAATCAATTCAGCTGGCCATCTGGAATCAATCCAGCTGCCCATCTGTAATCAATGACGTTTAGTCAGCACGGACAAAGTACTGAGAT	TCAGCTGACCATCTGTAATCAATACAGCTGACCATCTGCAATCAATTCAGCTGGCCATCTGGAATCAATCCAGCTGCCCATCTGTAATCAATGACGTTTA	cat4		N	CAGCTG,CCATCTG,AATCAAT-4-1	2884	1812	1079	1389	2392	2682	583	874	1486	1482	1968	1757	895	1088
ATCGAAAGGATGGGAGTACTAAGCTTCTCAGCTATTGATTTGTATGGTATTGATTAAAATGGAAATCAATTTTGAGCTATTGATTTGACTTTTATTGATTACAGTGTAAATCAATAAGACGTTTAGTCAGCACGGACAAAGTACTGAGAT	TCTCAGCTATTGATTTGTATGGTATTGATTAAAATGGAAATCAATTTTGAGCTATTGATTTGACTTTTATTGATTACAGTGTAAATCAATAAGACGTTTA	cat4		N	TATTGATT,TATTGATT,AAATCAAT-2-7	693	235	150	444	1354	1368	619	878	499	437	917	806	415	425
ATCGAAAGGATGGGAGTACTAAGCTTCTCAGCACCATTTGTGTATCAGCTGTAGGAAAATGGTCACTGAATCAGATGGGGTAGCCTGACTTTGTCCTTTCCATCAGTCTTTCCCCAAGACGTTTAGTCAGCACGGACAAAGTACTGAGAT	TCTCAGCACCATTTGTGTATCAGCTGTAGGAAAATGGTCACTGAATCAGATGGGGTAGCCTGACTTTGTCCTTTCCATCAGTCTTTCCCCAAGACGTTTA	cat4		N	CAGCTG,CAGATGG,TCCATCA-1-20	3474	2767	3052	3606	6706	7606	5289	8052	3684	3762	4182	6445	4002	3704
ATCGAAAGGATGGGAGTACTAAGCTTCAGCTGATCCATCATTATTGATTGCAGCTGATCCATCAATATTGATTGCAGCTGTTCCATCACTATTGATTTCAGCTGTTCCATCACTATTGATTTTTAGTCAGCACGGACAAAGTACTGAGAT	TCAGCTGATCCATCATTATTGATTGCAGCTGATCCATCAATATTGATTGCAGCTGTTCCATCACTATTGATTTCAGCTGTTCCATCACTATTGATTTTTA	cat4		N	CAGCTG,TCCATCA,TATTGATT-4-1	2286	1725	658	1290	4309	5250	3672	3288	582	590	311	419	838	856
ATCGAAAGGATGGGAGTACTAAGCTTCTCAGCACCAGCTGTGTATGGGACAGCTGAAAATGGTCCAGCTGTTTGAGCAGCAGCTGTGACTTTGTCAGCTGACAGTGTCTCAGCTGAAGACGTTTAGTCAGCACGGACAAAGTACTGAGAT	TCTCAGCACCAGCTGTGTATGGGACAGCTGAAAATGGTCCAGCTGTTTGAGCAGCAGCTGTGACTTTGTCAGCTGACAGTGTCTCAGCTGAAGACGTTTA	cat4		N	CAGCTG,CAGCTG,CAGCTG-2-9	3872	2826	2416	1516	2567	2965	2450	2257	3410	2799	4308	2734	2786	2534
ATCGAAAGGATGGGAGTACTAAGCTTCTCAGCACCATTTGTGTACAGATGGTAGGAAAATGGTCACTGAACAGATGGAGGTAGCCTGACTTTGTCCTATTGATTTGTCTTTCCCCAAGACGTTTAGTCAGCACGGACAAAGTACTGAGAT	TCTCAGCACCATTTGTGTACAGATGGTAGGAAAATGGTCACTGAACAGATGGAGGTAGCCTGACTTTGTCCTATTGATTTGTCTTTCCCCAAGACGTTTA	cat4		N	CAGATGG,CAGATGG,TATTGATT-1-19	5000	3708	4650	5231	4207	4942	3238	3442	4104	3566	6471	5679	3249	3702
ATCGAAAGGATGGGAGTACTAAGCTTATTGATCCTCCATCAGCCATCTGGATTGATCATCCATCACCCATCTGGATTGATCATCCATCATCCATCTGTATTGATCGTCCATCACCCATCTGTTTAGTCAGCACGGACAAAGTACTGAGAT	TATTGATCCTCCATCAGCCATCTGGATTGATCATCCATCACCCATCTGGATTGATCATCCATCATCCATCTGTATTGATCGTCCATCACCCATCTGTTTA	cat4		N	ATTGATC,TCCATCA,CCATCTG-4-1	2983	2455	2730	3709	5249	6386	3123	3945	614	447	204	186	58	89
ATCGAAAGGATGGGAGTACTAAGCTTATCAATACATCAATAGCCATCTGGATCAATAAATCAATACCCATCTGGATCAATAAATCAATATCCATCTGTATCAATAGATCAATACCCATCTGTTTAGTCAGCACGGACAAAGTACTGAGAT	TATCAATACATCAATAGCCATCTGGATCAATAAATCAATACCCATCTGGATCAATAAATCAATATCCATCTGTATCAATAGATCAATACCCATCTGTTTA	cat4		N	ATCAATA,ATCAATA,CCATCTG-4-1	659	529	358	446	853	872	250	466	77	0	1	0	15	0
ATCGAAAGGATGGGAGTACTAAGCTTCTCAGCACCATTTGTGTATCCATCATAGGAAAATGGTCACTGAAATCAATAAGGTAGCCTGACTTTGTCCTATTGATTTGTCTTTCCCCAAGACGTTTAGTCAGCACGGACAAAGTACTGAGAT	TCTCAGCACCATTTGTGTATCCATCATAGGAAAATGGTCACTGAAATCAATAAGGTAGCCTGACTTTGTCCTATTGATTTGTCTTTCCCCAAGACGTTTA	cat4		N	TCCATCA,ATCAATA,TATTGATT-1-19	4543	3503	2886	3884	4152	4305	1259	1818	2866	2753	5055	6578	1334	1570
ATCGAAAGGATGGGAGTACTAAGCTTCTCAGCACCATTTGTGTAATTGATCTAGGAAAATGGTCACTGAACAGATGGAGGTAGCCTGACTTTGTCCATCAATAGTGTCTTTCCCCAAGACGTTTAGTCAGCACGGACAAAGTACTGAGAT	TCTCAGCACCATTTGTGTAATTGATCTAGGAAAATGGTCACTGAACAGATGGAGGTAGCCTGACTTTGTCCATCAATAGTGTCTTTCCCCAAGACGTTTA	cat4		N	ATTGATC,CAGATGG,ATCAATA-1-19	1615	1132	1089	1490	4046	4501	1559	3585	333	500	330	99	863	852
ATCGAAAGGATGGGAGTACTAAGCTTTCCATCACATCAATTCCATCTGATCCATCAAATCAATCCCATCTGTTCCATCAGATCAATGCCATCTGCTCCATCAAATCAATTCCATCTGGACGTTTAGTCAGCACGGACAAAGTACTGAGAT	TTCCATCACATCAATTCCATCTGATCCATCAAATCAATCCCATCTGTTCCATCAGATCAATGCCATCTGCTCCATCAAATCAATTCCATCTGGACGTTTA	cat4		N	TCCATCA,ATCAAT,CCATCTG-4-1	7023	5108	3376	5101	5895	6408	4541	4478	283	293	682	634	1358	1569
ATCGAAAGGATGGGAGTACTAAGCTATCAATAATCAATATATTGATTATCAATAATCAATATATTGATTATCAATAATCAATATATTGATTATCAATAATCAATATATTGATTCCAAGACGTTTAGTCAGCACGGACAAAGTACTGAGAT	ATCAATAATCAATATATTGATTATCAATAATCAATATATTGATTATCAATAATCAATATATTGATTATCAATAATCAATATATTGATTCCAAGACGTTTA	cat4		N	ATCAATA,ATCAATA,TATTGATT-4-0	0	1	0	0	0	0	0	0	0	0	0	0	0	0
ATCGAAAGGATGGGAGTACTAAGCTTCAGCTGACAGATGGTATCAATGCAGCTGGCAGATGGTATCAATACAGCTGCCAGATGGCATCAATTCAGCTGCCAGATGGTATCAATCCAAGACGTTTAGTCAGCACGGACAAAGTACTGAGAT	TCAGCTGACAGATGGTATCAATGCAGCTGGCAGATGGTATCAATACAGCTGCCAGATGGCATCAATTCAGCTGCCAGATGGTATCAATCCAAGACGTTTA	cat4		N	CAGCTG,CAGATGG,ATCAAT-4-1	1651	1492	1391	1739	1445	1242	959	1012	977	888	2453	2140	3827	3800
ATCGAAAGGATGGGAGTACTAAGCTTCTCAGCACAGCTGGTGTATGGCCATCTGGAAAATGGAAATCAATTTTGAGCACAGCTGCTGACTTTCCATCTGAACAGTGTAAATCAATAAGACGTTTAGTCAGCACGGACAAAGTACTGAGAT	TCTCAGCACAGCTGGTGTATGGCCATCTGGAAAATGGAAATCAATTTTGAGCACAGCTGCTGACTTTCCATCTGAACAGTGTAAATCAATAAGACGTTTA	cat4		N	CAGCTG,CCATCTG,AAATCAAT-2-8	1360	1218	1529	1369	1378	1414	263	539	1364	971	2922	2371	1323	1611
ATCGAAAGGATGGGAGTACTAAGCTTCAGATGGCATCAATAGAATCAATGCAGATGGAATCAATACAATCAATGCAGATGGAATCAATATAATCAATTCAGATGGGATCAATACAATCAATTTTAGTCAGCACGGACAAAGTACTGAGAT	TCAGATGGCATCAATAGAATCAATGCAGATGGAATCAATACAATCAATGCAGATGGAATCAATATAATCAATTCAGATGGGATCAATACAATCAATTTTA	cat4		N	CAGATGG,ATCAATA,AATCAAT-4-1	280	201	43	156	1232	1198	520	531	5	26	1	12	25	30
ATCGAAAGGATGGGAGTACTAAGCTTCTCAGCACCATTTGTGTACAGCTGATAGGAAAATGGTCACTGATCCATCACAGGTAGCCTGACTTTGTCAAATCAATGTGTCTTTCCCCAAGACGTTTAGTCAGCACGGACAAAGTACTGAGAT	TCTCAGCACCATTTGTGTACAGCTGATAGGAAAATGGTCACTGATCCATCACAGGTAGCCTGACTTTGTCAAATCAATGTGTCTTTCCCCAAGACGTTTA	cat4		N	CAGCTG,TCCATCA,AAATCAAT-1-19	4928	3678	2985	4847	3850	3621	2459	3154	1636	1099	476	1156	641	665
ATCGAAAGGATGGGAGTACTAAGCTATCAATACCATCTGAAATCAATATCAATACCATCTGAAATCAATATCAATACCATCTGAAATCAATATCAATACCATCTGAAATCAATCCAAGACGTTTAGTCAGCACGGACAAAGTACTGAGAT	ATCAATACCATCTGAAATCAATATCAATACCATCTGAAATCAATATCAATACCATCTGAAATCAATATCAATACCATCTGAAATCAATCCAAGACGTTTA	cat4		N	ATCAATA,CCATCTG,AAATCAAT-4-0	701	407	332	507	1287	1439	1489	3195	423	342	693	651	281	397
ATCGAAAGGATGGGAGTACTAAGCTTATCAATACCATCTGTCCATCTGAATCAATACCATCTGCCCATCTGTATCAATGCCATCTGGCCATCTGCATCAATCCCATCTGTCCATCTGGACGTTTAGTCAGCACGGACAAAGTACTGAGAT	TATCAATACCATCTGTCCATCTGAATCAATACCATCTGCCCATCTGTATCAATGCCATCTGGCCATCTGCATCAATCCCATCTGTCCATCTGGACGTTTA	cat4		N	ATCAAT,CCATCTG,CCATCTG-4-1	3358	2384	1388	2699	2694	2428	2383	2639	2241	1812	2387	3652	4333	4768
ATCGAAAGGATGGGAGTACTAAGCTTCCATCATATTGATTAAATCAATTCCATCATATTGATTAAATCAATTCCATCATATTGATTAAATCAATTCCATCATATTGATTAAATCAATGACGTTTAGTCAGCACGGACAAAGTACTGAGAT	TCCATCATATTGATTAAATCAATTCCATCATATTGATTAAATCAATTCCATCATATTGATTAAATCAATTCCATCATATTGATTAAATCAATGACGTTTA	cat4		N	TCCATCA,TATTGATT,AAATCAAT-4-0	1092	1	14	12	94	720	179	340	863	415	527	765	196	336
ATCGAAAGGATGGGAGTACTAAGCTTCTCAGCACCATTTGTGTATATCAATTAGGAAAATGGTCACTGAATATCAATAGGTAGCCTGACTTTGTCCTATCAATGTGTCTTTCCCCAAGACGTTTAGTCAGCACGGACAAAGTACTGAGAT	TCTCAGCACCATTTGTGTATATCAATTAGGAAAATGGTCACTGAATATCAATAGGTAGCCTGACTTTGTCCTATCAATGTGTCTTTCCCCAAGACGTTTA	cat4		N	ATCAAT,ATCAAT,ATCAAT-1-20	3323	2756	1849	2288	3123	3192	5904	11353	3488	3665	2845	3421	1804	1459
ATCGAAAGGATGGGAGTACTAAGCTTCTCAGCACCATTTGTGTATCCATCATAGGAAAATGGTCACTGAATCCATCAAGGTAGCCTGACTTTGTCCAAATCAATTGTCTTTCCCCAAGACGTTTAGTCAGCACGGACAAAGTACTGAGAT	TCTCAGCACCATTTGTGTATCCATCATAGGAAAATGGTCACTGAATCCATCAAGGTAGCCTGACTTTGTCCAAATCAATTGTCTTTCCCCAAGACGTTTA	cat4		N	TCCATCA,TCCATCA,AAATCAAT-1-19	4153	2842	2255	3285	5729	6386	3382	5286	2599	2353	3158	3725	1893	2151
ATCGAAAGGATGGGAGTACTAAGCTTCTCAGCAATTGATCTGTATGGGTCCATCAAAAATGGTCCATCTGTTTGAGCAATTGATCTGACTTTGTCCATCAACAGTGTCCCATCTGAAGACGTTTAGTCAGCACGGACAAAGTACTGAGAT	TCTCAGCAATTGATCTGTATGGGTCCATCAAAAATGGTCCATCTGTTTGAGCAATTGATCTGACTTTGTCCATCAACAGTGTCCCATCTGAAGACGTTTA	cat4		N	ATTGATC,TCCATCA,CCATCTG-2-8	2838	1957	2105	1742	3738	4076	1353	2648	471	263	73	124	73	208
ATCGAAAGGATGGGAGTACTAAGCTTATTGATCCATCAATAGATCAATAATTGATCAATCAATAAATCAATTATTGATCGATCAATAAATCAATCATTGATCAATCAATATATCAATGACGTTTAGTCAGCACGGACAAAGTACTGAGAT	TATTGATCCATCAATAGATCAATAATTGATCAATCAATAAATCAATTATTGATCGATCAATAAATCAATCATTGATCAATCAATATATCAATGACGTTTA	cat4		N	ATTGATC,ATCAATA,ATCAAT-4-1	650	1	104	50	438	804	161	389	0	0	0	0	0	0
ATCGAAAGGATGGGAGTACTAAGCTTCAGCTGATCCATCATATCAATGCAGCTGGTCCATCATATCAATACAGCTGCTCCATCACATCAATTCAGCTGCTCCATCATATCAATCCAAGACGTTTAGTCAGCACGGACAAAGTACTGAGAT	TCAGCTGATCCATCATATCAATGCAGCTGGTCCATCATATCAATACAGCTGCTCCATCACATCAATTCAGCTGCTCCATCATATCAATCCAAGACGTTTA	cat4		N	CAGCTG,TCCATCA,ATCAAT-4-1	1454	975	836	788	2080	2308	2078	2190	667	411	613	526	699	731
ATCGAAAGGATGGGAGTACTAAGCTTCTCAGCACAGATGGTGTATGGGAATCAATAAAATGGTTATTGATTTTGAGCAGCAGATGGGACTTTGTAATCAATCAGTGTCTTATTGATTGACGTTTAGTCAGCACGGACAAAGTACTGAGAT	TCTCAGCACAGATGGTGTATGGGAATCAATAAAATGGTTATTGATTTTGAGCAGCAGATGGGACTTTGTAATCAATCAGTGTCTTATTGATTGACGTTTA	cat4		N	CAGATGG,AATCAAT,TATTGATT-2-8	1373	783	645	1039	2350	2714	1317	1701	1253	961	673	1534	1420	1631
ATCGAAAGGATGGGAGTACTAAGCTTATCAATACCATCTGTAATCAATAATCAATACCATCTGCAATCAATTATCAATGCCATCTGGAATCAATCATCAATCCCATCTGTAATCAATGACGTTTAGTCAGCACGGACAAAGTACTGAGAT	TATCAATACCATCTGTAATCAATAATCAATACCATCTGCAATCAATTATCAATGCCATCTGGAATCAATCATCAATCCCATCTGTAATCAATGACGTTTA	cat4		N	ATCAAT,CCATCTG,AATCAAT-4-1	2422	1312	1322	1980	2339	2866	2421	3020	992	695	1176	2352	720	721
ATCGAAAGGATGGGAGTACTAAGCTTATTGATCCATCAATTTATTGATTGATTGATCAATCAATATATTGATTGATTGATCAATCAATCTATTGATTTATTGATCGATCAATCTATTGATTTTTAGTCAGCACGGACAAAGTACTGAGAT	TATTGATCCATCAATTTATTGATTGATTGATCAATCAATATATTGATTGATTGATCAATCAATCTATTGATTTATTGATCGATCAATCTATTGATTTTTA	cat4		N	ATTGATC,ATCAAT,TATTGATT-4-1	1693	11	204	142	536	1323	920	1839	0	0	0	1	0	0
ATCGAAAGGATGGGAGTACTAAGCTTCTCAGCACCAGCTGTGTATGGGAATCAATAAAATGGTCATCAATTTTGAGCAGCAGCTGTGACTTTGTATCAATACAGTGTCTATCAATAAGACGTTTAGTCAGCACGGACAAAGTACTGAGAT	TCTCAGCACCAGCTGTGTATGGGAATCAATAAAATGGTCATCAATTTTGAGCAGCAGCTGTGACTTTGTATCAATACAGTGTCTATCAATAAGACGTTTA	cat4		N	CAGCTG,ATCAAT,ATCAAT-2-9	1581	998	1525	1398	2497	2987	2844	4107	931	607	2590	2984	1043	935
ATCGAAAGGATGGGAGTACTAAGCTTCTCAGCACCATTTGTGTAATTGATCTAGGAAAATGGTCACTGAATCCATCAAGGTAGCCTGACTTTGTCCTATTGATTTGTCTTTCCCCAAGACGTTTAGTCAGCACGGACAAAGTACTGAGAT	TCTCAGCACCATTTGTGTAATTGATCTAGGAAAATGGTCACTGAATCCATCAAGGTAGCCTGACTTTGTCCTATTGATTTGTCTTTCCCCAAGACGTTTA	cat4		N	ATTGATC,TCCATCA,TATTGATT-1-19	2304	1525	474	1278	3650	4324	2854	4752	431	401	105	187	658	510
ATCGAAAGGATGGGAGTACTAAGCTTATTGATCCCAGCTGTTATTGATTGATTGATCACAGCTGATATTGATTGATTGATCACAGCTGCTATTGATTTATTGATCGCAGCTGCTATTGATTTTTAGTCAGCACGGACAAAGTACTGAGAT	TATTGATCCCAGCTGTTATTGATTGATTGATCACAGCTGATATTGATTGATTGATCACAGCTGCTATTGATTTATTGATCGCAGCTGCTATTGATTTTTA	cat4		N	ATTGATC,CAGCTG,TATTGATT-4-1	1085	680	504	747	1556	1662	348	928	1	0	1	0	0	5
ATCGAAAGGATGGGAGTACTAAGCTTCTCAGCAATTGATCTGTATGGGTCCATCAAAAATGGTAATCAATTTTGAGCAATTGATCTGACTTTGTCCATCAACAGTGTCAATCAATAAGACGTTTAGTCAGCACGGACAAAGTACTGAGAT	TCTCAGCAATTGATCTGTATGGGTCCATCAAAAATGGTAATCAATTTTGAGCAATTGATCTGACTTTGTCCATCAACAGTGTCAATCAATAAGACGTTTA	cat4		N	ATTGATC,TCCATCA,AATCAAT-2-8	3194	2225	1280	2078	4401	5395	1922	1936	449	491	270	440	88	152
ATCGAAAGGATGGGAGTACTAAGCTTCTCAGCATCCATCATGTATGGGATCAATAAAAATGGTAATCAATTTTGAGCATCCATCATGACTTTGATCAATAACAGTGTCAATCAATAAGACGTTTAGTCAGCACGGACAAAGTACTGAGAT	TCTCAGCATCCATCATGTATGGGATCAATAAAAATGGTAATCAATTTTGAGCATCCATCATGACTTTGATCAATAACAGTGTCAATCAATAAGACGTTTA	cat4		N	TCCATCA,ATCAATA,AATCAAT-2-8	1619	726	1408	1347	2360	2723	1052	1586	76	60	0	68	29	20
ATCGAAAGGATGGGAGTACTAAGCTTCAGCTGAAATCAATTAAATCAATGCAGCTGAAATCAATAAAATCAATGCAGCTGTAATCAATCAAATCAATTCAGCTGTAATCAATCAAATCAATTTTAGTCAGCACGGACAAAGTACTGAGAT	TCAGCTGAAATCAATTAAATCAATGCAGCTGAAATCAATAAAATCAATGCAGCTGTAATCAATCAAATCAATTCAGCTGTAATCAATCAAATCAATTTTA	cat4		N	CAGCTG,AATCAAT,AAATCAAT-4-1	398	272	97	72	1291	1163	1486	1996	143	103	34	17	552	491
ATCGAAAGGATGGGAGTACTAAGCTTCTCAGCACCATTTGTGTAATCAATATAGGAAAATGGTCACTGAACCATCTGAGGTAGCCTGACTTTGTCCAATCAATGTGTCTTTCCCCAAGACGTTTAGTCAGCACGGACAAAGTACTGAGAT	TCTCAGCACCATTTGTGTAATCAATATAGGAAAATGGTCACTGAACCATCTGAGGTAGCCTGACTTTGTCCAATCAATGTGTCTTTCCCCAAGACGTTTA	cat4		N	ATCAATA,CCATCTG,AATCAAT-1-19	2900	1924	666	1204	4377	4402	6405	7888	1569	1354	1792	952	1622	1590
ATCGAAAGGATGGGAGTACTAAGCTTCTCAGCACCATTTGTGTATCAGCTGTAGGAAAATGGTCACTGAATATCAATAGGTAGCCTGACTTTGTCCTTAATCAATGTCTTTCCCCAAGACGTTTAGTCAGCACGGACAAAGTACTGAGAT	TCTCAGCACCATTTGTGTATCAGCTGTAGGAAAATGGTCACTGAATATCAATAGGTAGCCTGACTTTGTCCTTAATCAATGTCTTTCCCCAAGACGTTTA	cat4		N	CAGCTG,ATCAATA,AATCAAT-1-20	2557	1498	1525	1293	5541	5212	3849	5970	2390	1591	3496	2583	3313	3325
ATCGAAAGGATGGGAGTACTAAGCTTCTCAGCACCATTTGTGTAATCAATATAGGAAAATGGTCACTGAACCATCTGAGGTAGCCTGACTTTGTCCAAATCAATTGTCTTTCCCCAAGACGTTTAGTCAGCACGGACAAAGTACTGAGAT	TCTCAGCACCATTTGTGTAATCAATATAGGAAAATGGTCACTGAACCATCTGAGGTAGCCTGACTTTGTCCAAATCAATTGTCTTTCCCCAAGACGTTTA	cat4		N	ATCAATA,CCATCTG,AAATCAAT-1-19	2770	2047	2569	2776	3326	3426	3788	4320	1983	2038	3604	3701	1247	1670
ATCGAAAGGATGGGAGTACTAAGCTTCTCAGCACCATTTGTGTATCAGCTGTAGGAAAATGGTCACTGAATCAGATGGGGTAGCCTGACTTTGTCCTTATCAATTGTCTTTCCCCAAGACGTTTAGTCAGCACGGACAAAGTACTGAGAT	TCTCAGCACCATTTGTGTATCAGCTGTAGGAAAATGGTCACTGAATCAGATGGGGTAGCCTGACTTTGTCCTTATCAATTGTCTTTCCCCAAGACGTTTA	cat4		N	CAGCTG,CAGATGG,ATCAAT-1-20	3812	2815	3058	2696	4529	5290	2530	3366	2816	2416	3486	3671	1953	2227
ATCGAAAGGATGGGAGTACTAAGCTTCAGATGGCATCAATTCCATCTGACAGATGGAATCAATCCCATCTGTCAGATGGGATCAATGCCATCTGCCAGATGGAATCAATTCCATCTGGACGTTTAGTCAGCACGGACAAAGTACTGAGAT	TCAGATGGCATCAATTCCATCTGACAGATGGAATCAATCCCATCTGTCAGATGGGATCAATGCCATCTGCCAGATGGAATCAATTCCATCTGGACGTTTA	cat4		N	CAGATGG,ATCAAT,CCATCTG-4-1	1972	1438	1254	1158	2751	2954	1253	1679	130	231	264	102	597	649
ATCGAAAGGATGGGAGTACTAAGCTTCTCAGCACCATTTGTGTAATTGATCTAGGAAAATGGTCACTGAACAGCTGCAGGTAGCCTGACTTTGTCAAATCAATGTGTCTTTCCCCAAGACGTTTAGTCAGCACGGACAAAGTACTGAGAT	TCTCAGCACCATTTGTGTAATTGATCTAGGAAAATGGTCACTGAACAGCTGCAGGTAGCCTGACTTTGTCAAATCAATGTGTCTTTCCCCAAGACGTTTA	cat4		N	ATTGATC,CAGCTG,AAATCAAT-1-19	5850	4484	4094	3878	3288	3647	4340	3994	1334	1125	763	514	630	847
ATCGAAAGGATGGGAGTACTAAGCTTCAGATGGCCAGATGGGCCATCTGGCAGATGGACAGATGGCCCATCTGGCAGATGGACAGATGGTCCATCTGTCAGATGGGCAGATGGCCCATCTGTTTAGTCAGCACGGACAAAGTACTGAGAT	TCAGATGGCCAGATGGGCCATCTGGCAGATGGACAGATGGCCCATCTGGCAGATGGACAGATGGTCCATCTGTCAGATGGGCAGATGGCCCATCTGTTTA	cat4		N	CAGATGG,CAGATGG,CCATCTG-4-1	1186	1302	906	1474	1397	1511	982	1186	565	449	993	2333	695	881
ATCGAAAGGATGGGAGTACTAAGCTATTGATCTATTGATTAAATCAATATTGATCTATTGATTAAATCAATATTGATCTATTGATTAAATCAATATTGATCTATTGATTAAATCAATGACGTTTAGTCAGCACGGACAAAGTACTGAGAT	ATTGATCTATTGATTAAATCAATATTGATCTATTGATTAAATCAATATTGATCTATTGATTAAATCAATATTGATCTATTGATTAAATCAATGACGTTTA	cat4		N	ATTGATC,TATTGATT,AAATCAAT-4-0	213	0	0	0	0	4	1	1	0	0	0	0	0	0
ATCGAAAGGATGGGAGTACTAAGCTTTCCATCACATCAATAGATCAATAGTCCATCAAATCAATACATCAATAGTCCATCAAATCAATATATCAATATTCCATCAGATCAATACATCAATATTTAGTCAGCACGGACAAAGTACTGAGAT	TTCCATCACATCAATAGATCAATAGTCCATCAAATCAATACATCAATAGTCCATCAAATCAATATATCAATATTCCATCAGATCAATACATCAATATTTA	cat4		N	TCCATCA,ATCAATA,ATCAATA-4-1	1188	314	255	455	758	1112	229	322	0	0	2	39	0	0
ATCGAAAGGATGGGAGTACTAAGCTTCTCAGCAATTGATCTGTATGGGCCATCTGAAAATGGTTATTGATTTTGAGCAGATTGATCGACTTTGTCCATCTGCAGTGTCTTATTGATTGACGTTTAGTCAGCACGGACAAAGTACTGAGAT	TCTCAGCAATTGATCTGTATGGGCCATCTGAAAATGGTTATTGATTTTGAGCAGATTGATCGACTTTGTCCATCTGCAGTGTCTTATTGATTGACGTTTA	cat4		N	ATTGATC,CCATCTG,TATTGATT-2-8	1280	1123	467	1570	4392	5279	2277	2565	217	24	2	62	51	45
ATCGAAAGGATGGGAGTACTAAGCTTATCAATACCCATCTGGAATCAATGATCAATAACCATCTGCAATCAATGATCAATAACCATCTGTAATCAATTATCAATAGCCATCTGCAATCAATTTTAGTCAGCACGGACAAAGTACTGAGAT	TATCAATACCCATCTGGAATCAATGATCAATAACCATCTGCAATCAATGATCAATAACCATCTGTAATCAATTATCAATAGCCATCTGCAATCAATTTTA	cat4		N	ATCAATA,CCATCTG,AATCAAT-4-1	1309	939	342	436	2117	2075	1315	1325	0	0	1	1	1	8
ATCGAAAGGATGGGAGTACTAAGCTTCTCAGCAATTGATCTGTATGGGATTGATCAAAATGGTCAGATGGTTTGAGCAATTGATCTGACTTTGATTGATCACAGTGTCCAGATGGAAGACGTTTAGTCAGCACGGACAAAGTACTGAGAT	TCTCAGCAATTGATCTGTATGGGATTGATCAAAATGGTCAGATGGTTTGAGCAATTGATCTGACTTTGATTGATCACAGTGTCCAGATGGAAGACGTTTA	cat4		N	ATTGATC,ATTGATC,CAGATGG-2-8	3004	2059	2688	2067	2747	2994	1143	1566	138	151	0	37	64	117
ATCGAAAGGATGGGAGTACTAAGCTTCTCAGCACCATTTGTGTACAGATGGTAGGAAAATGGTCACTGAACCATCTGAGGTAGCCTGACTTTGTCCAAATCAATTGTCTTTCCCCAAGACGTTTAGTCAGCACGGACAAAGTACTGAGAT	TCTCAGCACCATTTGTGTACAGATGGTAGGAAAATGGTCACTGAACCATCTGAGGTAGCCTGACTTTGTCCAAATCAATTGTCTTTCCCCAAGACGTTTA	cat4		N	CAGATGG,CCATCTG,AAATCAAT-1-19	4153	3333	3166	4271	4439	5229	2288	3499	3724	3691	7122	5982	2448	2713
ATCGAAAGGATGGGAGTACTAAGCTTCTCAGCACCATTTGTGTAATTGATCTAGGAAAATGGTCACTGAATCCATCAAGGTAGCCTGACTTTGTCCTCCATCAGTGTCTTTCCCCAAGACGTTTAGTCAGCACGGACAAAGTACTGAGAT	TCTCAGCACCATTTGTGTAATTGATCTAGGAAAATGGTCACTGAATCCATCAAGGTAGCCTGACTTTGTCCTCCATCAGTGTCTTTCCCCAAGACGTTTA	cat4		N	ATTGATC,TCCATCA,TCCATCA-1-19	4505	3825	2318	2739	6541	7237	3958	5393	665	636	448	779	820	876
ATCGAAAGGATGGGAGTACTAAGCTTCTCAGCACCATTTGTGTATATTGATCAGGAAAATGGTCACTGAATTATCAATAGTAGCCTGACTTTGTCCTTCATCAATGTCTTTCCCCAAGACGTTTAGTCAGCACGGACAAAGTACTGAGAT	TCTCAGCACCATTTGTGTATATTGATCAGGAAAATGGTCACTGAATTATCAATAGTAGCCTGACTTTGTCCTTCATCAATGTCTTTCCCCAAGACGTTTA	cat4		N	ATTGATC,ATCAATA,ATCAAT-1-20	2920	2273	1812	2335	4115	4653	2265	2931	647	704	168	231	617	418
ATCGAAAGGATGGGAGTACTAAGCTTATTGATCCATCAATTAAATCAATGATTGATCAATCAATAAAATCAATGATTGATCAATCAATCAAATCAATTATTGATCGATCAATCAAATCAATTTTAGTCAGCACGGACAAAGTACTGAGAT	TATTGATCCATCAATTAAATCAATGATTGATCAATCAATAAAATCAATGATTGATCAATCAATCAAATCAATTATTGATCGATCAATCAAATCAATTTTA	cat4		N	ATTGATC,ATCAAT,AAATCAAT-4-1	723	156	156	96	715	828	610	1371	0	0	0	0	0	0
ATCGAAAGGATGGGAGTACTAAGCTTCTCAGCACCATTTGTGTAATTGATCTAGGAAAATGGTCACTGAAATTGATCAGGTAGCCTGACTTTGTCCAATCAATGTGTCTTTCCCCAAGACGTTTAGTCAGCACGGACAAAGTACTGAGAT	TCTCAGCACCATTTGTGTAATTGATCTAGGAAAATGGTCACTGAAATTGATCAGGTAGCCTGACTTTGTCCAATCAATGTGTCTTTCCCCAAGACGTTTA	cat4		N	ATTGATC,ATTGATC,AATCAAT-1-19	2714	2184	2017	2343	4200	4907	1958	2287	106	174	92	151	47	70
ATCGAAAGGATGGGAGTACTAAGCTTCTCAGCACCATTTGTGTACAGATGGTAGGAAAATGGTCACTGAAAATCAATAGGTAGCCTGACTTTGTCCAATCAATGTGTCTTTCCCCAAGACGTTTAGTCAGCACGGACAAAGTACTGAGAT	TCTCAGCACCATTTGTGTACAGATGGTAGGAAAATGGTCACTGAAAATCAATAGGTAGCCTGACTTTGTCCAATCAATGTGTCTTTCCCCAAGACGTTTA	cat4		N	CAGATGG,AATCAAT,AATCAAT-1-19	3461	2922	2160	3362	4477	4498	3223	3486	3038	2562	3597	4190	2135	2153
ATCGAAAGGATGGGAGTACTAAGCTTCTCAGCACAGCTGGTGTATGGATCAATGGAAAATGAATCAATAATTTGAGCAGCTGGCCTGACTATCAATTTCAACAGAATCAATCCCCAAGACGTTTAGTCAGCACGGACAAAGTACTGAGAT	TCTCAGCACAGCTGGTGTATGGATCAATGGAAAATGAATCAATAATTTGAGCAGCTGGCCTGACTATCAATTTCAACAGAATCAATCCCCAAGACGTTTA	cat4		N	CAGCTG,ATCAAT,AATCAAT-2-8	3296	2518	1966	3266	1493	1348	977	775	1108	802	1535	1998	385	343
ATCGAAAGGATGGGAGTACTAAGCTTCTCAGCAATCAATATGTATGGGATCAATAAAAATGGTTATTGATTTTGAGCAGATCAATAGACTTTGTATCAATACAGTGTCTTATTGATTGACGTTTAGTCAGCACGGACAAAGTACTGAGAT	TCTCAGCAATCAATATGTATGGGATCAATAAAAATGGTTATTGATTTTGAGCAGATCAATAGACTTTGTATCAATACAGTGTCTTATTGATTGACGTTTA	cat4		N	ATCAATA,ATCAATA,TATTGATT-2-8	1188	785	525	628	2666	3269	2061	3122	81	16	2	1	13	58
ATCGAAAGGATGGGAGTACTAAGCTTCAGCTGACAGCTGGCAGATGGGCAGCTGGCAGCTGGCAGATGGACAGCTGCCAGCTGCCAGATGGTCAGCTGCCAGCTGGCAGATGGCCAAGACGTTTAGTCAGCACGGACAAAGTACTGAGAT	TCAGCTGACAGCTGGCAGATGGGCAGCTGGCAGCTGGCAGATGGACAGCTGCCAGCTGCCAGATGGTCAGCTGCCAGCTGGCAGATGGCCAAGACGTTTA	cat4		N	CAGCTG,CAGCTG,CAGATGG-4-1	2196	4080	2680	2405	2003	1767	740	1039	2433	2108	3276	2196	1518	1638
ATCGAAAGGATGGGAGTACTAAGCTTCTCAGCACAGCTGGTGTATGGTCCATCAGAAAATGGATCAATAATTTGAGCCAGCTGCCTGACTTTCCATCACAACAGTGATCAATACCAAGACGTTTAGTCAGCACGGACAAAGTACTGAGAT	TCTCAGCACAGCTGGTGTATGGTCCATCAGAAAATGGATCAATAATTTGAGCCAGCTGCCTGACTTTCCATCACAACAGTGATCAATACCAAGACGTTTA	cat4		N	CAGCTG,TCCATCA,ATCAATA-2-8	2430	1869	771	1177	2223	2288	1021	1400	102	84	1	1	320	222
ATCGAAAGGATGGGAGTACTAAGCTTCTCAGCACAGATGGTGTATGGGCAGATGGAAAATGGTAAATCAATTTGAGCAGCAGATGGGACTTTGTCAGATGGCAGTGTCTAAATCAATGACGTTTAGTCAGCACGGACAAAGTACTGAGAT	TCTCAGCACAGATGGTGTATGGGCAGATGGAAAATGGTAAATCAATTTGAGCAGCAGATGGGACTTTGTCAGATGGCAGTGTCTAAATCAATGACGTTTA	cat4		N	CAGATGG,CAGATGG,AAATCAAT-2-8	1811	1435	376	645	1803	2591	1023	1338	1203	920	728	1206	2347	2159
ATCGAAAGGATGGGAGTACTAAGCTTCTCAGCATCCATCATGTATGGGATCAATAAAAATGGTATCAATATTTGAGCATCCATCATGACTTTGATCAATAACAGTGTCATCAATAAAGACGTTTAGTCAGCACGGACAAAGTACTGAGAT	TCTCAGCATCCATCATGTATGGGATCAATAAAAATGGTATCAATATTTGAGCATCCATCATGACTTTGATCAATAACAGTGTCATCAATAAAGACGTTTA	cat4		N	TCCATCA,ATCAATA,ATCAATA-2-8	2730	1915	1815	1617	2556	2650	884	1529	74	62	51	0	35	11
ATCGAAAGGATGGGAGTACTAAGCTTCTCAGCACCATTTGTGTATATTGATTAGGAAAATGGTCACTGAATTATTGATTGTAGCCTGACTTTGTCCTTTATTGATTTCTTTCCCCAAGACGTTTAGTCAGCACGGACAAAGTACTGAGAT	TCTCAGCACCATTTGTGTATATTGATTAGGAAAATGGTCACTGAATTATTGATTGTAGCCTGACTTTGTCCTTTATTGATTTCTTTCCCCAAGACGTTTA	cat4		N	TATTGATT,TATTGATT,TATTGATT-1-19	5258	3135	1755	3139	3662	4519	3706	4435	3494	2706	4865	3840	1695	2083
ATCGAAAGGATGGGAGTACTAAGCTTCTCAGCACCATTTGTGTATCCATCATAGGAAAATGGTCACTGAACCATCTGAGGTAGCCTGACTTTGTCCAATCAATGTGTCTTTCCCCAAGACGTTTAGTCAGCACGGACAAAGTACTGAGAT	TCTCAGCACCATTTGTGTATCCATCATAGGAAAATGGTCACTGAACCATCTGAGGTAGCCTGACTTTGTCCAATCAATGTGTCTTTCCCCAAGACGTTTA	cat4		N	TCCATCA,CCATCTG,AATCAAT-1-19	5508	4516	4303	7681	5268	6468	4166	5752	4594	4139	8335	9811	2048	2338
ATCGAAAGGATGGGAGTACTAAGCTTCTCAGCACAGATGGTGTATGGGATCAATAAAAATGGTTATTGATTTTGAGCAGCAGATGGGACTTTGTATCAATACAGTGTCTTATTGATTGACGTTTAGTCAGCACGGACAAAGTACTGAGAT	TCTCAGCACAGATGGTGTATGGGATCAATAAAAATGGTTATTGATTTTGAGCAGCAGATGGGACTTTGTATCAATACAGTGTCTTATTGATTGACGTTTA	cat4		N	CAGATGG,ATCAATA,TATTGATT-2-8	1727	1638	893	1273	2553	2658	909	986	369	175	228	87	513	435
ATCGAAAGGATGGGAGTACTAAGCTTCTCAGCACCATTTGTGTATCCATCATAGGAAAATGGTCACTGAATCCATCAAGGTAGCCTGACTTTGTCCAATCAATGTGTCTTTCCCCAAGACGTTTAGTCAGCACGGACAAAGTACTGAGAT	TCTCAGCACCATTTGTGTATCCATCATAGGAAAATGGTCACTGAATCCATCAAGGTAGCCTGACTTTGTCCAATCAATGTGTCTTTCCCCAAGACGTTTA	cat4		N	TCCATCA,TCCATCA,AATCAAT-1-19	2284	2137	1258	1856	4553	4533	1669	2621	1806	1534	2853	1701	1267	1329
ATCGAAAGGATGGGAGTACTAAGCTTCTCAGCACCATTTGTGTAATTGATCTAGGAAAATGGTCACTGAAATCAATCAGGTAGCCTGACTTTGTCAAATCAATGTGTCTTTCCCCAAGACGTTTAGTCAGCACGGACAAAGTACTGAGAT	TCTCAGCACCATTTGTGTAATTGATCTAGGAAAATGGTCACTGAAATCAATCAGGTAGCCTGACTTTGTCAAATCAATGTGTCTTTCCCCAAGACGTTTA	cat4		N	ATTGATC,ATCAAT,AAATCAAT-1-19	2268	1797	1493	1111	4413	4355	2136	3378	439	458	130	423	720	889
ATCGAAAGGATGGGAGTACTAAGCTTCTCAGCACCATTTGTGTAAATCAATTAGGAAAATGGTCACTGAAAATCAATAGGTAGCCTGACTTTGTCCAAATCAATTGTCTTTCCCCAAGACGTTTAGTCAGCACGGACAAAGTACTGAGAT	TCTCAGCACCATTTGTGTAAATCAATTAGGAAAATGGTCACTGAAAATCAATAGGTAGCCTGACTTTGTCCAAATCAATTGTCTTTCCCCAAGACGTTTA	cat4		N	AATCAAT,AATCAAT,AAATCAAT-1-19	4005	2382	1570	2312	3838	4114	2408	3569	2668	2615	2434	2766	2328	2298
ATCGAAAGGATGGGAGTACTAAGCTTCTCAGCACCATTTGTGTATATCAATAAGGAAAATGGTCACTGAATTATCAATGGTAGCCTGACTTTGTCCTTAATCAATGTCTTTCCCCAAGACGTTTAGTCAGCACGGACAAAGTACTGAGAT	TCTCAGCACCATTTGTGTATATCAATAAGGAAAATGGTCACTGAATTATCAATGGTAGCCTGACTTTGTCCTTAATCAATGTCTTTCCCCAAGACGTTTA	cat4		N	ATCAATA,ATCAAT,AATCAAT-1-20	3448	2899	2460	2842	5123	5513	2609	4409	2899	2324	3673	4456	2279	2629
ATCGAAAGGATGGGAGTACTAAGCTTCTCAGCACCATTTGTGTATCAGCTGTAGGAAAATGGTCACTGAATATCAATAGGTAGCCTGACTTTGTCCTTATCAATTGTCTTTCCCCAAGACGTTTAGTCAGCACGGACAAAGTACTGAGAT	TCTCAGCACCATTTGTGTATCAGCTGTAGGAAAATGGTCACTGAATATCAATAGGTAGCCTGACTTTGTCCTTATCAATTGTCTTTCCCCAAGACGTTTA	cat4		N	CAGCTG,ATCAATA,ATCAAT-1-20	2924	2590	2534	2768	4840	5050	3281	4560	2731	3033	2819	2522	3091	3312
ATCGAAAGGATGGGAGTACTAAGCTTCTCAGCACCATTTGTGTATATTGATCAGGAAAATGGTCACTGAATTATTGATCGTAGCCTGACTTTGTCCTTCCAGCTGGTCTTTCCCCAAGACGTTTAGTCAGCACGGACAAAGTACTGAGAT	TCTCAGCACCATTTGTGTATATTGATCAGGAAAATGGTCACTGAATTATTGATCGTAGCCTGACTTTGTCCTTCCAGCTGGTCTTTCCCCAAGACGTTTA	cat4		N	ATTGATC,ATTGATC,CAGCTG-1-20	4890	3535	3898	4401	3945	4056	1848	1822	229	82	1	18	22	14
ATCGAAAGGATGGGAGTACTAAGCTCAAAGGAATGTTTGTTTGCCATTAGGCTGATCCTAGGCTGATCCTAGGCATTAGGCATGTTTACATTTAGTGTTAAGGTTAAAAGCATCAGGCCTTAAAGGTCAGCACGGACAAAGTACTGAGAT	CAAAGGAATGTTTGTTTGCCATTAGGCTGATCCTAGGCTGATCCTAGGCATTAGGCATGTTTACATTTAGTGTTAAGGTTAAAAGCATCAGGCCTTAAAG	cat5	KMAC-designed opening DE	Y	CAAAGG:-31.2,AAGGAA:-18.7,GGAATGT:-37.0,ATGTTTGTT:-7.6,TGTTTGCCA:-5.8,GCCATTA:-5.3,ATTAGGCTGATCC:-19.0,ATCCTAGGC:-18.0,AGGCTGATCC:-22.1,ATCCTAGGCA:-21.9,GGCATTAGGC:-17.8,AGGCATGT:-5.7,ATGTTTACAT:-17.5,ACATTTA:-27.4,TTTAGTGTTAA:-5.8,TTAAGGTTAAAA:-18.1,AAAAGCATCAGG:-20.7,CAGGCCTTA:-17.9,CTTAAAGTGTGA:-18.7	1847	1196	638	739	1770	2027	961	1074	1500	1306	2131	853	727	719
ATCGAAAGGATGGGAGTACTAAGCTATATTTACAGCAGATAAGCAAACAAATGTAAACATAGCAAGAATTTACACATACACAGAAGAGGGATAAGTAAAAGCATCAGGGCTTGTTTGCTCTTGTTGTCAGCACGGACAAAGTACTGAGAT	ATATTTACAGCAGATAAGCAAACAAATGTAAACATAGCAAGAATTTACACATACACAGAAGAGGGATAAGTAAAAGCATCAGGGCTTGTTTGCTCTTGTT	cat5	KMAC-designed opening DE	Y	ATATTTACA:-5.8,TACAGCAGA:-8.1,CAGATAAGC:-5.5,AAGCAAACAAA:-5.8,CAAATGT:-13.7,ATGTAAACAT:-17.5,ACATAGCAA:-5.5,GCAAGAATT:-24.3,AATTTA:-21.7,TTTACACA:-8.5,CACATACAC:-6.0,ACACAGA:-19.5,CAGAAGAGGG:-8.5,AGGGATAA:-12.4,ATAAG:-39.3,TAAGTAAA:-11.2,TAAAAGCATCAGG:-20.7,CAGGGCTTGTT:-16.6,TGTTTGCTCT:-7.9,CTCTTGTTT:-5.3	857	594	679	581	844	915	425	802	1149	1148	2166	1019	297	286
ATCGAAAGGATGGGAGTACTAAGCTGATGCTTTTAACCTTAAAGTGCTAATCATTAAAAGCATTCCTTATCTCTTTGCTTTAAGGTTAACTAAATTCCTTATCAGGAATGTAAACATGCCTTTGAGTCAGCACGGACAAAGTACTGAGAT	GATGCTTTTAACCTTAAAGTGCTAATCATTAAAAGCATTCCTTATCTCTTTGCTTTAAGGTTAACTAAATTCCTTATCAGGAATGTAAACATGCCTTTGA	cat5	KMAC-designed opening DE	Y	GATGCTTTTAACC:-18.4,AACCTTAAAGTG:-18.1,AGTGCTAA:-7.5,CTAATC:-27.9,AATCATTAA:-5.6,TTAAAAGC:-10.5,AAGCATTC:-7.6,ATTCCTTA:-5.3,CTTATCTCT:-8.5,CTCTTTG:-12.8,TTTGCTTT:-19.3,CTTTAAGGTTAA:-18.1,TTAACTA:-14.0,ACTAA:-20.2,CTAAATT:-9.3,AATTC:-20.9,ATTCCTTA:-5.3,CTTATCAGG:-10.4,CAGGAATGT:-7.7,ATGTAAACAT:-17.5,ACATGCCT:-5.7,GCCTTTGATCT:-5.2	1000	544	644	286	1445	1663	693	930	1519	1122	2045	1294	898	1340
ATCGAAAGGATGGGAGTACTAAGCTCAAAGGGATAACTAAGCTGATAAGGAATGCTTTGATGAGTCAACAGTGCTGTTTGTGATTTTGCTGAAAACAAAACAAAGCAAATAAAGTGTGAAAGGAAGTCAGCACGGACAAAGTACTGAGAT	CAAAGGGATAACTAAGCTGATAAGGAATGCTTTGATGAGTCAACAGTGCTGTTTGTGATTTTGCTGAAAACAAAACAAAGCAAATAAAGTGTGAAAGGAA	cat5	KMAC-designed opening DE	Y	CAAAGGG:-10.8,AGGGATAAC:-15.8,TAACTA:-12.9,ACTAAGCT:-5.9,AGCTGATA:-7.2,GATAAGGA:-5.1,AGGAATGC:-12.4,ATGCTT:-20.3,GCTTTGAT:-11.4,TGATGAGTC:-5.2,AGTCAACAG:-6.6,ACAGTGCT:-6.9,TGCTGTTTG:-6.5,TTTGTGATTT:-5.8,ATTTTGCTGAAA:-5.9,GAAAACAAA:-7.8,CAAAACAAAG:-5.8,AAAGCAAA:-19.3,CAAATAAA:-5.9,TAAAGTGTGAAA:-22.8,GAAAGGAATT:-10.8	321	182	4	297	787	823	672	309	364	286	1	0	876	724
ATCGAAAGGATGGGAGTACTAAGCTGTAAGTAAACAGGATCAAAGCATCAGGGGTTGTTAACTCTCCAGGCAAGAGTTTACTTTAATCCTAGGCAAACAGCAGATAAATATTAACACTTCAAAGGGTCAGCACGGACAAAGTACTGAGAT	GTAAGTAAACAGGATCAAAGCATCAGGGGTTGTTAACTCTCCAGGCAAGAGTTTACTTTAATCCTAGGCAAACAGCAGATAAATATTAACACTTCAAAGG	cat5	KMAC-designed opening DE	Y	GTAAGT:-10.3,AAGTAAACAG:-5.5,ACAGGAT:-13.2,GGATCAAAG:-7.2,AAAGCATCAGGGG:-19.9,GGGGTTGTTAACTC:-21.3,ACTCTCCAG:-6.3,CCAGGCAAG:-17.8,CAAGAGTTT:-7.3,GTTTACTTT:-10.2,CTTTAATCC:-5.6,ATCCTAGGC:-18.0,AGGCAAACA:-7.2,AACAGCAG:-9.1,GCAGATAA:-6.0,ATAAATATT:-5.2,TATTAACACT:-5.5,CACTTCAAAG:-6.4,AAAGGGACA:-5.3	691	758	1151	1420	694	603	553	902	1245	752	1813	2060	476	528
ATCGAAAGGATGGGAGTACTAAGCTTTCACAGAAGATAAGGCCTGTGTTATCTCTTTGACAGAGTTAACAACCCCCTGATGAAGAGGGCAGGGCTGATCCTTTGAAGTTAATGTCAAGAGTTAACGTCAGCACGGACAAAGTACTGAGAT	TTCACAGAAGATAAGGCCTGTGTTATCTCTTTGACAGAGTTAACAACCCCCTGATGAAGAGGGCAGGGCTGATCCTTTGAAGTTAATGTCAAGAGTTAAC	cat5	KMAC-designed opening DE	Y	TTCACAG:-8.6,ACAGAAGA:-5.3,AAGATAA:-33.5,ATAAG:-39.3,TAAGGCCTG:-17.9,CCTGTGTT:-5.5,TGTTATCTC:-7.6,TCTCTTTGA:-7.9,TTGACAGAG:-5.5,AGAGTTAACAACCCC:-21.0,CCCCCTGATG:-19.8,GATGAA:-12.6,TGAAG:-13.6,GAAGAGGGCA:-5.5,GGCAGGGCT:-5.9,GGCTGATCCT:-21.5,TCCTTTGA:-7.2,TTGAAGT:-12.2,AAGTTAAT:-7.3,TAATGTCA:-6.7,GTCAAGAGTTAA:-22.2,TTAACTAA:-5.3	2006	1569	1121	1117	1210	1115	324	292	824	737	1060	907	462	330
ATCGAAAGGATGGGAGTACTAAGCTTAAGGTTAAAAGCAAACAGAGCAAACAAAGCAGGTGCTAATGTAAGTCAACAGCTGATAACATTCCTTTTGAAGTCATTCCTAATGCCAGAAGAGTTAACGTCAGCACGGACAAAGTACTGAGAT	TAAGGTTAAAAGCAAACAGAGCAAACAAAGCAGGTGCTAATGTAAGTCAACAGCTGATAACATTCCTTTTGAAGTCATTCCTAATGCCAGAAGAGTTAAC	cat5	KMAC-designed opening DE	Y	TAAGGTTAAAAG:-18.7,AAAGCAAACA:-8.4,AACAGAGC:-5.1,GAGCAAAC:-9.8,AAACAAAGCA:-6.4,AGCAGGTGC:-5.2,GTGCTAA:-17.4,CTAATGTAA:-17.2,GTAAGT:-10.3,AAGTCAACA:-8.2,AACAGCTG:-8.6,GCTGATAA:-11.8,ATAAC:-18.1,TAACATTC:-6.4,ATTCCTTT:-17.6,CTTTTGAAG:-10.3,GAAGTCATT:-5.5,CATTCCTA:-7.5,CCTAATGCCAG:-19.0,CCAGAAGAG:-5.8,AGAGTTAACAA:-21.9	272	242	287	365	1310	1497	749	1220	736	645	1096	831	1074	1154
ATCGAAAGGATGGGAGTACTAAGCTTCAAACAAATAATCACATTCTTAGTCAAGAGTTAACCTTAAAGTGTGTGTTTTCTTATCTCTGTGTGTGTGTCAACAAATAAGAATTTAAATGCTTTTAAGTCAGCACGGACAAAGTACTGAGAT	TCAAACAAATAATCACATTCTTAGTCAAGAGTTAACCTTAAAGTGTGTGTTTTCTTATCTCTGTGTGTGTGTCAACAAATAAGAATTTAAATGCTTTTAA	cat5	KMAC-designed opening DE	Y	TCAAACAAA:-5.4,CAAATAA:-5.9,ATAAT:-17.9,TAATCAC:-5.6,TCACATTCT:-5.3,TTCTTAG:-14.2,TTAGTCA:-8.7,GTCAAGAGTTAA:-22.2,TTAACCTTAAAGTGT:-17.8,GTGTGTGTTT:-6.0,GTTTTCTTA:-5.5,CTTATCTCTG:-6.1,TCTGTGTGTGTGT:-9.9,GTGTCAACA:-5.5,AACAAATAA:-5.3,ATAAG:-39.3,TAAGAATTT:-11.4,ATTTAAA:-5.2,TAAATGC:-6.2,ATGCTTTTAACCT:-18.7	556	518	389	255	732	848	483	526	1241	996	659	394	681	707
ATCGAAAGGATGGGAGTACTAAGCTGTTAGCTCTGTGATAGCTCACTGTTTTTGAAATATTTACTTCAGAGTAAATTCCTGGAACTCTGTTTCAGGGGGATTAATCTCTCTGTGTGTGTGTAAAGGTCAGCACGGACAAAGTACTGAGAT	GTTAGCTCTGTGATAGCTCACTGTTTTTGAAATATTTACTTCAGAGTAAATTCCTGGAACTCTGTTTCAGGGGGATTAATCTCTCTGTGTGTGTGTAAAG	cat5	KMAC-designed opening DE	Y	GTTAGCT:-5.6,AGCTCTGTGATAG:-10.5,ATAG:-34.3,ATAGCTCA:-5.2,CTCACTGTT:-5.6,TGTTTTTGA:-5.5,TTGAAATA:-5.9,AATATTTAC:-9.9,TTACTTCA:-6.1,TTCAGA:-9.2,CAGAGTAAA:-5.1,TAAATTC:-10.0,ATTCCTGGA:-6.1,TGGAACTC:-8.5,ACTCTGT:-9.7,CTGTTTCA:-5.9,TTCAG:-19.0,TCAGGGGG:-8.8,GGGGATTA:-8.7,ATTAATCT:-6.7,ATCTCTCTG:-5.3,TCTGTGTGTGT:-9.2,GTGTGTAAA:-5.2,TAAAGTGTGAAAT:-21.0	572	368	401	448	1218	1282	672	452	779	616	770	835	511	759
ATCGAAAGGATGGGAGTACTAAGCTGCAAACAAAGCTTTGATGTCAAAGCAAATATTTACAAAGTCAACAAAGGTTAAAAGCACTGTGATTTGTTTTTATCTTTCTTTTATCTGATGCCCTGCCTGTCAGCACGGACAAAGTACTGAGAT	GCAAACAAAGCTTTGATGTCAAAGCAAATATTTACAAAGTCAACAAAGGTTAAAAGCACTGTGATTTGTTTTTATCTTTCTTTTATCTGATGCCCTGCCT	cat5	KMAC-designed opening DE	Y	GCAAACAAA:-8.5,CAAAGCT:-11.6,AGCTTTG:-11.6,TTTGATGTC:-7.3,TGTCAAAG:-7.3,AAAGCAA:-13.1,GCAAATATT:-8.2,TATTTACA:-14.0,TACAAAGT:-7.3,AAGTCAACA:-8.2,AACAAAGG:-10.9,AAGGTTAAAAGCA:-18.4,AGCACTGTG:-5.1,TGTGATTTGT:-6.1,TTGTTTTTA:-5.9,TTTATCTT:-8.9,TCTTTCTTTT:-5.7,TTTTATCT:-11.3,ATCTGATGCCC:-5.8,GCCCTGCCT:-8.9	993	562	941	958	2012	1976	960	2695	1989	1492	3889	3283	2540	2814
ATCGAAAGGATGGGAGTACTAAGCTAAAGGGAATGCAGATAACAAGCCCTCTTCTGTGATAATTCCTGTTTGTTTATCTGTGTGTATGTGTGAAATTCCTGTGTCAAAGCCAGGCAAACAAATCAGTCAGCACGGACAAAGTACTGAGAT	AAAGGGAATGCAGATAACAAGCCCTCTTCTGTGATAATTCCTGTTTGTTTATCTGTGTGTATGTGTGAAATTCCTGTGTCAAAGCCAGGCAAACAAATCA	cat5	KMAC-designed opening DE	Y	AAAGGGAA:-7.9,GGAATGCAG:-7.0,GCAGATAA:-6.0,ATAACAAGCCC:-15.5,GCCCTCTTCTG:-5.1,TCTGTGAT:-8.5,TGATAATTC:-6.1,ATTCCTG:-12.4,CCTGTT:-5.8,TGTTTGTTTA:-6.7,TTTATCTG:-14.7,TCTGTGTGT:-13.0,GTGTATGTGTG:-5.6,TGTGAA:-34.5,TGAAATTC:-10.3,ATTCCTGT:-6.1,CTGTGTCAA:-5.5,TCAAAGCCA:-5.9,GCCAGGCAA:-20.1,GCAAACAAA:-8.5,CAAATCACA:-6.4	325	137	63	316	883	945	597	540	315	362	171	262	603	731
ATCGAAAGGATGGGAGTACTAAGCTATAAACAGAAAGGAATGCTTTGAAGTTAACTCTTGCCTAGGATCACATTCCCTTTAAGGTTAACACTAAGAATTCCACATCAAAAGGAATGTTAACTCTGGTCAGCACGGACAAAGTACTGAGAT	ATAAACAGAAAGGAATGCTTTGAAGTTAACTCTTGCCTAGGATCACATTCCCTTTAAGGTTAACACTAAGAATTCCACATCAAAAGGAATGTTAACTCTG	cat5	KMAC-designed opening DE	Y	ATAAACAGA:-5.1,CAGAAAGG:-5.1,AAGGAAT:-13.5,GAATGCTT:-7.6,GCTTTGAAGT:-7.3,AAGTTAA:-9.7,TTAACT:-44.8,AACTCTTGCC:-5.5,TGCCTAG:-6.1,CTAGGATCA:-21.6,ATCACATTC:-5.2,ATTCCCTTT:-7.5,CTTTAAGGTTA:-18.1,GTTAA:-67.3,TTAACACTAA:-6.7,CTAAGAATT:-12.6,AATTCCACA:-5.8,CACATCAA:-8.5,TCAAAAGGA:-7.2,AGGAATGTT:-7.3,TGTTAACTCT:-22.8,CTCTGTCA:-7.1	371	144	330	659	690	734	559	556	1501	1261	1319	1691	796	1310
ATCGAAAGGATGGGAGTACTAAGCTTCTCAGCAGGTGCTAAGAATTTACATTCCAGGAATGGTAAATATAGCACAGCAGGCAGCTGTGAACAAACAAAACAATGGTTTGGTTTGGTGTGTGTGTGGTCAGCACGGACAAAGTACTGAGAT	TCTCAGCAGGTGCTAAGAATTTACATTCCAGGAATGGTAAATATAGCACAGCAGGCAGCTGTGAACAAACAAAACAATGGTTTGGTTTGGTGTGTGTGTG	cat5	KMAC-designed opening DE	Y	TCTCAGCA:-7.0,AGCAGGTGC:-5.2,GTGCTAA:-17.4,CTAAGAATTT:-13.1,ATTTACAT:-6.5,ACATTCC:-37.0,TTCCA:-11.7,TCCAGGAAT:-6.1,GAATGGTA:-5.1,GGTAAATAT:-5.5,ATATAGC:-5.9,ACAGCAGGCA:-5.2,GGCAGCTGT:-5.4,CTGTGAA:-8.6,TGAAC:-10.4,GAACAAACA:-7.9,AACAAAACAA:-10.4,ACAATGGT:-7.0,TGGTTTGGT:-5.5,TGGTTTGGT:-5.5,TGGTGTGTGTGTG:-5.3	140	143	93	125	376	470	878	592	488	601	486	588	1768	2158
ATCGAAAGGATGGGAGTACTAAGCTATTCCCTTTAGTGTTAACCTTAAAGTTAATCCTGTGACATCAGCAGAGGGCATCAAAGAGCTCTGTGAAATTCTGCTGTGATCCTAGGCATTAGGCCTTAGTCAGCACGGACAAAGTACTGAGAT	ATTCCCTTTAGTGTTAACCTTAAAGTTAATCCTGTGACATCAGCAGAGGGCATCAAAGAGCTCTGTGAAATTCTGCTGTGATCCTAGGCATTAGGCCTTA	cat5	KMAC-designed opening DE	Y	ATTCCCTTT:-7.5,CTTTAGTGTTAA:-5.8,TTAACCTTAAAGT:-18.1,AAGTTAA:-9.7,TTAATCC:-14.0,ATCCTGT:-13.2,CTGTGACA:-6.1,GACATCAG:-5.6,TCAGCAGAG:-5.1,AGAGGGCATCA:-6.7,ATCAAAGAG:-6.6,AGAGCTCTGTGA:-13.7,GTGAAATTCT:-21.8,TTCTGCTGT:-7.7,CTGTGAT:-13.1,TGATC:-19.8,GATCCTAGGCA:-22.2,GGCATTAGGC:-17.8,AGGCCTTAA:-18.0	3181	2351	1148	1608	2565	2810	912	1139	1819	1665	1609	1378	399	676
ATCGAAAGGATGGGAGTACTAAGCTCTTATCTTGCTCACAGAGAAATTCACAGCTCCCTCTGTGTGTGTATGTGTGTGTGTGTTGGTTTGCTCTGAGTCACACCTGTGCTAATTGATCAAAGAGAGTCAGCACGGACAAAGTACTGAGAT	CTTATCTTGCTCACAGAGAAATTCACAGCTCCCTCTGTGTGTGTATGTGTGTGTGTGTTGGTTTGCTCTGAGTCACACCTGTGCTAATTGATCAAAGAGA	cat5	KMAC-designed opening DE	Y	CTTATCTTG:-11.4,CTTGCTCA:-6.5,CTCACAGA:-6.5,CAGAGAAA:-5.7,GAAATTCAC:-6.4,TCACAGCT:-7.5,AGCTCCCTCT:-5.8,CTCTGTGTG:-10.8,TGTGTGTATG:-6.7,TATGTGTGTGTG:-5.7,TGTGTGTTGG:-5.5,TTGGTTT:-7.2,GTTTGCTCTG:-6.4,TCTGAGTC:-5.1,AGTCACA:-8.5,CACACCTGT:-5.1,CTGTGCTAA:-5.8,CTAATTGA:-7.2,TTGATC:-13.9,GATCAAAGAG:-5.2,AGAGATAAA:-5.6	965	898	470	755	2021	2382	1268	2323	330	340	208	157	268	314
ATCGAAAGGATGGGAGTACTAAGCTGAGAACAAAACAAAGGATCAGCCTAATGCCAGGTAAACACAAGATGGCAGTGACATTTTGTGATTAAATGCCTTTGTTCCTTTTGAGATAATTCCCTTTGGTCAGCACGGACAAAGTACTGAGAT	GAGAACAAAACAAAGGATCAGCCTAATGCCAGGTAAACACAAGATGGCAGTGACATTTTGTGATTAAATGCCTTTGTTCCTTTTGAGATAATTCCCTTTG	cat5	KMAC-designed opening DE	Y	GAGAACAAA:-5.4,CAAAACAAAG:-5.8,AAAGGA:-21.9,AGGATCAGCCTAA:-19.6,CTAATGCCAGG:-19.3,CAGGTAAA:-7.1,TAAACACAA:-5.2,ACAAGAT:-7.9,AGATGGCAGT:-5.2,CAGTGACA:-5.3,GACATTTT:-6.4,TTTTGTGATT:-5.6,GATTA:-43.6,ATTAAAT:-20.9,AAATGCCT:-8.3,GCCTTT:-9.2,CTTTGTTCCT:-5.2,TCCTTTTGA:-7.2,TTGAGATA:-5.1,GATAATT:-8.1,AATTCCCT:-5.1,CCCTTTGAA:-6.6	2177	1618	1761	1751	1915	2070	984	877	1779	1829	1637	2679	800	824
ATCGAAAGGATGGGAGTACTAAGCTTGAATTTAGAGCTCTGTGTGTGTGACACACAGAGGAACAAAGGCATACCTCTGTGTGTGTGTTTGAAAACAAACACACACACAGAGAAGAGGGGGTTGTTGTCAGCACGGACAAAGTACTGAGAT	TGAATTTAGAGCTCTGTGTGTGTGACACACAGAGGAACAAAGGCATACCTCTGTGTGTGTGTTTGAAAACAAACACACACACAGAGAAGAGGGGGTTGTT	cat5	KMAC-designed opening DE	Y	TGAAT:-24.9,GAATTTA:-10.0,TTTAGAGCTCTG:-12.0,TCTGTGTGT:-13.0,GTGTGTGA:-7.2,GTGACAC:-8.3,ACACACAGA:-13.0,CAGAGGA:-6.1,AGGAACAAAG:-5.2,AAAGGCAT:-7.4,GCATACCT:-6.1,ACCTCTGTG:-5.6,TGTGTGTGTGTT:-10.9,TGTTTGAAA:-6.7,GAAAACAAAC:-5.2,AAACACACACACA:-5.9,CACAGAGAA:-6.0,AGAAGAGGG:-8.0,AGGGGGTTGTTA:-21.6	856	468	455	386	679	806	302	722	703	604	1628	701	512	578
ATCGAAAGGATGGGAGTACTAAGCTGTGTGAGTGTTTGCTTTGATGTCTCTTTGATCAAAGCAAACAAAGGAGATCAAAGAAAAGAGATTAGCGAATTTCACACACACACAAACATCAAAGAAAAGTCAGCACGGACAAAGTACTGAGAT	GTGTGAGTGTTTGCTTTGATGTCTCTTTGATCAAAGCAAACAAAGGAGATCAAAGAAAAGAGATTAGCGAATTTCACACACACACAAACATCAAAGAAAA	cat5	KMAC-designed opening DE	Y	GTGTGAGTGT:-5.1,GTGTTTGCTT:-5.5,GCTTTGATGT:-5.5,ATGTCTCT:-6.2,CTCTTTGATC:-5.2,GATCAAAGC:-6.4,AAGCAAACA:-15.3,AACAAAGGA:-7.7,AGGAGA:-8.0,GAGATCAAAG:-7.0,AAAGAAAA:-7.1,AAAAGAGA:-6.9,GAGATTAGC:-9.3,GAATTTCACA:-24.3,CACACACACACAA:-5.4,ACAAACATCA:-5.1,ATCAAAGA:-7.4,AAGAAAAGAAA:-10.5	1	8	0	1	632	526	344	604	3	3	5	8	86	101
ATCGAAAGGATGGGAGTACTAAGCTCTCTTCTGGAATTCCTTATCATTATCTCAGCAGGCTGAGCTCTAAATGTAAATTCCTTTTGAAATTCCTTTGAAGTGTTAATGGCTTTGATCTGTGTGTGGTCAGCACGGACAAAGTACTGAGAT	CTCTTCTGGAATTCCTTATCATTATCTCAGCAGGCTGAGCTCTAAATGTAAATTCCTTTTGAAATTCCTTTGAAGTGTTAATGGCTTTGATCTGTGTGTG	cat5	KMAC-designed opening DE	Y	CTCTTCTGG:-5.8,CTGGAATTC:-7.6,ATTCCTT:-13.5,CCTTA:-11.5,CTTATCAT:-5.1,TCATTATC:-7.0,TATCTCA:-19.1,CTCAGCAGG:-5.7,CAGGCTGAGC:-5.8,GAGCTCTAAAT:-13.7,AAATGTAAA:-5.4,TAAATTC:-10.0,ATTCCTT:-13.5,CCTTTTGAA:-6.0,TGAAATTC:-10.3,ATTCCTTT:-17.6,CTTTGAAGTG:-6.4,AGTGTTAAT:-7.3,TAATGGC:-5.3,TGGCTTTGA:-5.9,TTGATCTG:-7.3,TCTGTGT:-19.5,GTGTGTGTGTGTT:-11.1	1054	733	1086	1023	598	490	583	1199	2934	2676	1404	1182	649	908
ATCGAAAGGATGGGAGTACTAAGCTAACAAGGCATTAGGATCAGCCCTGGCTGATCCTAATGCCAGGCACACAGCAGGCCTTATCTCTGCTGTAAGTTAATCATTAACTCTCCAGCTGTGGTCAGGTCAGCACGGACAAAGTACTGAGAT	AACAAGGCATTAGGATCAGCCCTGGCTGATCCTAATGCCAGGCACACAGCAGGCCTTATCTCTGCTGTAAGTTAATCATTAACTCTCCAGCTGTGGTCAG	cat5	KMAC-designed opening DE	Y	AACAAGGCA:-5.6,GGCATTAGG:-19.6,TAGGATCAGCC:-23.1,AGCCCTGGCT:-5.5,GGCTGATCCTA:-23.1,CCTAATGCCAGGC:-18.7,AGGCACACA:-5.4,CACAGCAGG:-5.9,CAGGCCTTA:-17.9,CTTATCTCTG:-6.1,TCTGCTGTAA:-7.0,GTAAGT:-10.3,AAGTTAAT:-7.3,TAATC:-43.6,AATCATTAA:-5.6,TTAACTC:-20.4,ACTCTCCAG:-6.3,CCAGCTGT:-10.6,CTGTGGTCA:-5.4,GTCAGGAA:-5.9	442	258	25	471	912	1089	111	329	93	135	6	886	45	75
ATCGAAAGGATGGGAGTACTAAGCTAACAACCCCCTGATGCTTTTAATCTTAAGGCCTTTGATCTAAATTCTTATCTAATCTCTTTTGTGTCAAAGTAACTCTGCTGACACAGAGAGATAAGCAAGTCAGCACGGACAAAGTACTGAGAT	AACAACCCCCTGATGCTTTTAATCTTAAGGCCTTTGATCTAAATTCTTATCTAATCTCTTTTGTGTCAAAGTAACTCTGCTGACACAGAGAGATAAGCAA	cat5	KMAC-designed opening DE	Y	AACAACCCCCTG:-21.6,CCTGATGCTTTTAA:-19.0,TTAATCTT:-5.1,TCTTA:-22.0,CTTAAGGCCT:-20.3,GCCTTTGATCT:-5.2,ATCTAA:-5.2,CTAAATTCTT:-13.4,TCTTATCT:-14.3,ATCTAA:-5.2,CTAATCTC:-11.9,TCTCTTTT:-6.9,TTTTGTGTC:-5.2,TGTCAAAG:-7.3,AAAGTAAC:-5.9,TAACTCT:-14.1,CTCTGCTGA:-5.1,CTGACACA:-10.1,CACAGAGAGA:-5.2,GAGATAAGC:-6.4,AAGCAAACAA:-7.9	288	134	2	30	1023	1152	1640	2681	234	300	3	1	657	536
ATCGAAAGGATGGGAGTACTAAGCTTGTTTGCTCTTTGAAGTAATGTGTGTGTGTGGAATGTTTACTTATCATCTCTGTGACACACCTGTTTCAGATAGAGATAAAAACAAACAGCAGCTGTTTGGTCAGCACGGACAAAGTACTGAGAT	TGTTTGCTCTTTGAAGTAATGTGTGTGTGTGGAATGTTTACTTATCATCTCTGTGACACACCTGTTTCAGATAGAGATAAAAACAAACAGCAGCTGTTTG	cat5	KMAC-designed opening DE	Y	TGTTTGCTCT:-7.9,CTCTTTGA:-10.8,TTGAAGT:-12.2,AAGTA:-14.9,AGTAATGTG:-7.6,TGTGTGTGTGTGG:-5.2,GTGGAATG:-5.1,AATGTTTAC:-27.0,TTACT:-66.2,TACTTA:-11.5,CTTATCAT:-5.1,TCATCTCT:-9.0,CTCTGTGA:-15.6,GTGACACA:-6.0,CACACCTGT:-5.1,CTGTTTCA:-5.9,TTCAGA:-9.2,CAGATAGA:-6.5,TAGAGAT:-7.2,AGATAAAAA:-7.3,AAAACAAAC:-14.2,AAACAGCAG:-8.5,GCAGCTGT:-9.2,CTGTTTGTT:-6.5	2075	1426	1075	1635	2338	2405	1688	2584	2287	2117	2882	3697	1229	1405
ATCGAAAGGATGGGAGTACTAAGCTGCATTCCTAGGCAGCTGTGAAATTCTTTATCTCTTTGATCTCTGTGTGTGTGTGGAATGTAAATATGAACTCTTTGATCTTTCATGTAACTGTCACACATGTCAGCACGGACAAAGTACTGAGAT	GCATTCCTAGGCAGCTGTGAAATTCTTTATCTCTTTGATCTCTGTGTGTGTGTGGAATGTAAATATGAACTCTTTGATCTTTCATGTAACTGTCACACAT	cat5	KMAC-designed opening DE	Y	GCATTCCT:-12.4,TCCTAGGCAG:-22.5,GCAGCTGTG:-9.3,TGTGAAATTCT:-22.5,TTCTTT:-13.3,CTTTATC:-14.9,TATCTCT:-10.6,CTCTTTGAT:-6.6,TGATCTCT:-5.9,CTCTGTGTG:-10.8,TGTGTGTGTGG:-7.0,GTGGAATG:-5.1,AATGTAAA:-27.3,TAAATAT:-20.7,ATATGAACT:-5.1,AACTCTT:-11.4,TCTTTGAT:-7.4,TGATCTTT:-5.7,CTTTCATGT:-6.7,ATGTA:-32.9,TGTAACTG:-5.4,ACTGTCA:-6.6,GTCACACA:-7.1,CACATTCCT:-7.7	1745	1594	422	1237	2670	2591	1882	2534	1025	718	780	514	410	417
ATCGAAAGGATGGGAGTACTAAGCTTGTGTCAGCTGTTTACATCACAGCAGTTAACACTATCCTCTTGTTTGTTTTCTCTGTGTCATTAAGGCCTAATGCCAGGCAAAGTGTAAACTCTTGCTGAGTCAGCACGGACAAAGTACTGAGAT	TGTGTCAGCTGTTTACATCACAGCAGTTAACACTATCCTCTTGTTTGTTTTCTCTGTGTCATTAAGGCCTAATGCCAGGCAAAGTGTAAACTCTTGCTGA	cat5	KMAC-designed opening DE	Y	TGTGTCAG:-10.1,TCAGCTGT:-6.1,CTGTTTACAT:-5.2,ACATCACA:-6.0,CACAGCAG:-8.0,GCAGTTAA:-6.7,TTAACACTA:-7.3,ACTATC:-10.3,TATCCTCT:-5.4,CTCTTGTTT:-5.3,GTTTGTTTT:-14.2,TTTTCTC:-8.9,TCTCTGT:-18.1,CTGTGTCA:-7.9,GTCATTAA:-6.4,TTAAGGCCT:-18.0,GCCTAATGCCA:-17.8,GCCAGGCAA:-20.1,GCAAAGT:-5.4,AAGTGTAA:-5.1,GTAAAC:-58.6,AAACTCTTGC:-5.8,TTGCTGACA:-6.1	4962	3403	3147	4015	2805	3198	1761	1995	6280	4204	6405	10408	2032	2671
ATCGAAAGGATGGGAGTACTAAGCTTTGTTAACTCTTGCTTTGTGACATTCCTTTGCTGTGTCACAGAGCTCTGTGAGTCATTGTCTCCAGCTGTGAGTCAGGAAGATAAAAGCAGGTGCAAACAGTCAGCACGGACAAAGTACTGAGAT	TTGTTAACTCTTGCTTTGTGACATTCCTTTGCTGTGTCACAGAGCTCTGTGAGTCATTGTCTCCAGCTGTGAGTCAGGAAGATAAAAGCAGGTGCAAACA	cat5	KMAC-designed opening DE	Y	TTGTTAACT:-21.0,AACTCTTGC:-5.8,TTGCTTTGT:-7.0,TTGTGACA:-7.0,GACATTCCT:-5.2,TCCTTTGCT:-6.7,TGCTGTG:-13.7,TGTGTCAC:-6.0,TCACAGAGCTC:-14.0,GCTCTGTGA:-10.7,GTGAGTCAT:-6.4,TCATTGTC:-6.4,TGTCTCCA:-6.5,TCCAGCTG:-8.7,GCTGTGA:-10.4,GTGAGTCA:-7.5,GTCAGGAAG:-5.8,GAAGATAA:-5.3,ATAA:-111.3,ATAAA:-33.7,TAAAAGCA:-5.8,AGCAGGTGC:-5.2,GTGCAAAC:-6.0,AAACAGTGA:-5.6	281	296	402	911	677	743	718	1056	1499	1268	2100	3609	1610	2324
ATCGAAAGGATGGGAGTACTAAGCTTGCCTGCCTGTCAAGAGTTTGAAAGCACAGGAATGTAAACATTCCAAATGTTTACAAATGTTTTTATCTCTCTGTGATGTCTTGAAAGTCACACATCACAGTCAGCACGGACAAAGTACTGAGAT	TGCCTGCCTGTCAAGAGTTTGAAAGCACAGGAATGTAAACATTCCAAATGTTTACAAATGTTTTTATCTCTCTGTGATGTCTTGAAAGTCACACATCACA	cat5	KMAC-designed opening DE	Y	TGCCTGCCT:-5.3,GCCTGTCAAG:-17.7,CAAGAGTTT:-7.3,GTTTGAA:-8.8,TGAAAGCA:-7.9,AGCACAGG:-5.4,CAGGAATGT:-7.7,ATGTAAACAT:-17.5,ACATTCCAA:-8.2,CCAAATGT:-5.6,ATGTTTACAA:-5.5,ACAAATGT:-6.7,ATGTTTT:-6.7,TTTTTATCT:-7.3,ATCT:-87.1,ATCTCTCTG:-5.3,TCTGTGAT:-8.5,TGATGTCT:-10.8,TGAAA:-37.1,GAAAGTCA:-5.2,GTCACACA:-7.1,CACATCACA:-7.0	1269	1051	827	596	1333	1803	513	804	2724	1985	1739	1436	1574	1696
ATCGAAAGGATGGGAGTACTAAGCTGTGTGTGTGTTTGCACATTCCTTTGACAAAAGAATTCCCTTTGATGTAAACACAGTTACAAATGTTTGCTGACATTTAGAGCTTTGAAGAGGGCATTGTTGTCAGCACGGACAAAGTACTGAGAT	GTGTGTGTGTTTGCACATTCCTTTGACAAAAGAATTCCCTTTGATGTAAACACAGTTACAAATGTTTGCTGACATTTAGAGCTTTGAAGAGGGCATTGTT	cat5	KMAC-designed opening DE	Y	GTGTGTGTGTT:-10.7,TGTTTGCAC:-9.0,GCACATTCC:-6.2,TTCCTTTGA:-5.7,TTGACAAAA:-5.2,AAAAGA:-13.9,AAGAATT:-23.2,AATTCCCTT:-6.1,CCTTTGATGT:-9.2,ATGTAAACA:-21.8,AACACAGT:-5.9,CAGTTACA:-5.4,TACAAATG:-6.6,AATGTTTGC:-8.7,TTGCTGACA:-6.1,GACATTT:-8.2,ATTTAGAGCT:-13.7,AGCTTTGAAG:-5.8,GAAGAGGGCAT:-5.6,GCATTGT:-6.3,TTGTTAACTCTT:-21.9	1028	462	410	649	1232	1100	875	1482	3120	2433	2560	3702	2259	2294
ATCGAAAGGATGGGAGTACTAAGCTAGGCCTTAAGTAAAGTGTGAAATCAAAGTGTGTATGTGTGAGTGTGACTCTGTGGTCAGGAAAGTCAACAAAGCAAGAATTTAATAGAGCTCTGTGATAGGTCAGCACGGACAAAGTACTGAGAT	AGGCCTTAAGTAAAGTGTGAAATCAAAGTGTGTATGTGTGAGTGTGACTCTGTGGTCAGGAAAGTCAACAAAGCAAGAATTTAATAGAGCTCTGTGATAG	cat5	KMAC-designed opening DE	Y	AGGCCTTAAG:-20.3,TAAGTAAA:-11.2,TAAAGTGTGAAAT:-21.0,AAATCAAAG:-5.2,AAAGTGT:-23.1,GTGTGTATGTGT:-5.9,GTGTGAGTGTG:-5.2,TGTGACTC:-6.7,ACTCTGT:-9.7,CTGTGGTCA:-5.4,GTCAGGAA:-5.9,GGAAAGT:-7.2,AAGTCAACA:-8.2,AACAAAGCAA:-5.5,GCAAGAATTT:-23.1,ATTTAAT:-20.9,TAATAGA:-7.3,TAGAGCTCTGTGAT:-13.4,TGATAGC:-14.0	521	505	241	516	1828	1476	1134	961	908	553	850	1017	481	643
ATCGAAAGGATGGGAGTACTAAGCTGATGAGTCAACAGCAGGAATGTGACACACACACATACACACACAGATTAATCTCTTTAAAGATAACAAGCCCTCTTCTGTGTGTGTGTGAAATTCAAAGGGTCAGCACGGACAAAGTACTGAGAT	GATGAGTCAACAGCAGGAATGTGACACACACACATACACACACAGATTAATCTCTTTAAAGATAACAAGCCCTCTTCTGTGTGTGTGTGAAATTCAAAGG	cat5	KMAC-designed opening DE	Y	GATGAGTC:-6.6,AGTCAACAG:-6.6,ACAGCAGG:-8.0,CAGGAATGT:-7.7,ATGTGACA:-7.9,GACACACAC:-6.3,ACACACATAC:-7.7,ATACACACAC:-8.2,ACACAGA:-19.5,CAGATTA:-8.0,ATTAATCT:-6.7,ATCTCTT:-7.1,TCTTTAAA:-6.9,TAAAGATAA:-5.2,ATAACAAGCCC:-15.5,GCCCTCTTCTG:-5.1,TCTGTGTGTGTGT:-9.9,GTGTGAAATTC:-24.0,ATTCA:-24.9,TTCAAAGGG:-6.6	996	654	296	775	1039	1532	865	823	1464	981	717	727	1090	925
ATCGAAAGGATGGGAGTACTAAGCTATGTATACATTCCTGATGCTTTTGAATATTTGCTTTGTTTGCTTTGATTGATAACACATTCCTTTCTTTCACACACATACACAGTTAACTCTTGCCTGGCGTCAGCACGGACAAAGTACTGAGAT	ATGTATACATTCCTGATGCTTTTGAATATTTGCTTTGTTTGCTTTGATTGATAACACATTCCTTTCTTTCACACACATACACAGTTAACTCTTGCCTGGC	cat5	KMAC-designed opening DE	Y	ATGTATA:-8.2,TATACAT:-8.2,ACATTCCTG:-7.7,CCTGATGCTTT:-21.0,CTTTTGAA:-9.4,TGAATA:-13.2,AATATTTGC:-8.2,TTGCTTT:-13.1,CTTTGTT:-23.2,TGTTTGCTT:-15.3,GCTTTGAT:-11.4,TGATTGAT:-8.0,TGATAACACA:-5.2,CACATTCC:-14.3,TTCCTTTCT:-10.4,TTCTTTCA:-8.3,TTCACA:-34.5,CACACACATACAC:-6.7,ACACAGTT:-5.4,AGTTA:-39.0,GTTAACTCTTG:-23.4,CTTGCCTGGCATT:-18.4	1043	841	488	779	1942	2072	1292	1330	2368	2964	2208	1819	1665	2002
ATCGAAAGGATGGGAGTACTAAGCTTTAGATAGCTGACAAAAGAAAAAGCAGGGGGCATTAGGATCAGAGCTGTGTAAACAGCAGGCTGAGCTCTAAAAGGAATGTCCTTTCAAAGCAAAGGTTAGTCAGCACGGACAAAGTACTGAGAT	TTAGATAGCTGACAAAAGAAAAAGCAGGGGGCATTAGGATCAGAGCTGTGTAAACAGCAGGCTGAGCTCTAAAAGGAATGTCCTTTCAAAGCAAAGGTTA	cat5	KMAC-designed opening DE	Y	TTAGATAG:-5.2,ATAG:-34.3,ATAG:-34.3,ATAGCTGAC:-8.7,TGACAAAA:-7.2,AAAAGAAAAA:-8.1,AAAAGCA:-8.6,AGCAGGGGGCA:-5.2,GGCATTAGG:-19.6,TAGGATCAG:-24.8,TCAGAGCTG:-5.6,GCTGTGT:-8.8,GTGTAAACA:-11.2,AACAGCAGG:-7.5,CAGGCTGAGC:-5.8,GAGCTCTAAA:-13.7,TAAAAG:-14.8,AAAGGAAT:-17.6,GAATGTC:-9.8,TGTCCTTT:-6.1,CTTTCAA:-12.0,TCAAAGC:-16.1,AAGCAAAGG:-6.1,AAGGTTAAAAG:-18.7	423	225	182	224	919	1038	485	823	660	389	525	929	1063	1173
ATCGAAAGGATGGGAGTACTAAGCTAAAGAGAGAAAAAAGAATGTAAACAGGAATGTTTGCTGTGTGTGTGTATGTGACACACACACACAGATAACTCTTTGCCTGGCATTAGGCTTATCTTGTAGTCAGCACGGACAAAGTACTGAGAT	AAAGAGAGAAAAAAGAATGTAAACAGGAATGTTTGCTGTGTGTGTGTATGTGACACACACACACAGATAACTCTTTGCCTGGCATTAGGCTTATCTTGTA	cat5	KMAC-designed opening DE	Y	AAAGAGAGA:-7.9,GAGAAAA:-8.9,AAAAAAGAA:-12.4,AGAATGT:-15.3,ATGTAAACA:-21.8,AACAGG:-5.8,CAGGAATG:-11.9,AATGTTTGCT:-5.5,TGCTGTGTG:-6.5,TGTGTGTGTATGT:-6.4,ATGTGACA:-7.9,GACACACACACA:-6.2,CACACAGAT:-6.1,AGATAACT:-6.4,AACTCTT:-11.4,TCTTTGC:-5.3,TTGCCTGGCA:-23.7,GGCATTAGGCT:-17.8,GGCTTATCT:-9.3,ATCTTGT:-7.9,TTGTAAACAT:-5.5	538	449	498	1249	2117	2152	1407	1494	731	572	418	1621	530	642
ATCGAAAGGATGGGAGTACTAAGCTAGAAAGCATTCCTATCCCTTTGAATGTTTACCTCTGTGTCAGCTGTGTAAACAGCAAACATTAACAAGCCCTGCTGTTTTCTTTTTCTTTCTTCTTTCACGTCAGCACGGACAAAGTACTGAGAT	AGAAAGCATTCCTATCCCTTTGAATGTTTACCTCTGTGTCAGCTGTGTAAACAGCAAACATTAACAAGCCCTGCTGTTTTCTTTTTCTTTCTTCTTTCAC	cat5	KMAC-designed opening DE	Y	AGAAAGCA:-11.4,AGCATTCC:-8.4,TTCCTATC:-6.4,TATCCCT:-8.0,CCCTTTGAA:-6.6,TGAAT:-24.9,GAATGTT:-7.1,TGTTTACCT:-10.2,ACCTCTGTG:-5.6,TGTGTCAG:-10.1,TCAGCTGT:-6.1,CTGTGTAAA:-6.1,TAAAC:-54.7,AAACAGCA:-13.4,AGCAAACATT:-5.5,CATTAAC:-13.7,TAACAAGCCCT:-16.3,CCCTGCTGTT:-5.2,TGTTTTC:-14.4,TTTCTTTTT:-6.9,TTTTCTTT:-7.1,CTTTCTTCT:-5.6,TTCTTTCA:-8.3,TTCACACC:-9.6	1788	1096	867	602	3707	4185	1149	1840	2453	1806	1833	1729	1425	1654
ATCGAAAGGATGGGAGTACTAAGCTATGTTTACATTCCAGTCATTCCTATCTGGCATTAGGATCAGATAATTCCCTTTGAAGTGTTAACTTCAAAGAGGTCACACATCAAGAGTTAACTCTTCTGGTCAGCACGGACAAAGTACTGAGAT	ATGTTTACATTCCAGTCATTCCTATCTGGCATTAGGATCAGATAATTCCCTTTGAAGTGTTAACTTCAAAGAGGTCACACATCAAGAGTTAACTCTTCTG	cat5	KMAC-designed opening DE	Y	ATGTTTACA:-25.9,TACATTCC:-9.8,TTCCAGTC:-5.1,AGTCATTCC:-6.1,TTCCTATC:-6.4,TATCTGG:-16.7,CTGGCATTAGG:-19.0,TAGGATCAG:-24.8,TCAGATA:-6.2,GATAATT:-8.1,AATTCCCTTT:-5.5,CTTTGAAGTG:-6.4,AGTGTTAA:-9.9,TTAACTT:-9.7,ACTTCAAAGA:-5.5,AAGAGGTCA:-5.5,GTCACACA:-7.1,CACATCAA:-8.5,TCAAGAGTTAAC:-23.1,TAACTCT:-14.1,CTCTTCTGG:-5.8	645	672	469	443	931	1017	866	1892	1838	1903	1184	705	2188	2318
ATCGAAAGGATGGGAGTACTAAGCTAGGCATTTCACACTTTAAGAATTCTTAGTTAAGGTTAAATGTTTACTCTGTGATTGATAAATATTTACATAAATTCTTTACTTTAGCAAAGGAATGTATAGTCAGCACGGACAAAGTACTGAGAT	AGGCATTTCACACTTTAAGAATTCTTAGTTAAGGTTAAATGTTTACTCTGTGATTGATAAATATTTACATAAATTCTTTACTTTAGCAAAGGAATGTATA	cat5	KMAC-designed opening DE	Y	AGGCATTT:-8.3,ATTTCAC:-12.6,TCACACTTTAAG:-18.7,TAAGAATT:-13.7,AATTCTTAG:-12.6,TTAGTTAA:-5.3,TTAAGGTTAAA:-18.1,TAAATGTT:-24.6,TGTTTACTCT:-5.5,CTCTGTGAT:-10.7,TGATTGAT:-8.0,TGATAA:-19.3,ATAAATATT:-5.2,TATTTACAT:-5.2,ACATAA:-5.6,ATAAA:-33.7,TAAATTCTT:-12.6,TCTTTACT:-8.3,TACTTTAG:-7.6,TTAGCA:-22.4,AGCAAAGGA:-6.7,AGGAATGT:-19.2,ATGTATA:-8.2	90	0	0	0	17	360	39	139	55	8	0	1	387	439
ATCGAAAGGATGGGAGTACTAAGCTGAGTAAATGCCTGTCAAGAGTTAACTGCATTCCTTTCTTTTGAAACAGAAGAAAGGAATGCAAACAGCAGGGAATTTAATGCCAGGCAAAGTGTAAACAGGTCAGCACGGACAAAGTACTGAGAT	GAGTAAATGCCTGTCAAGAGTTAACTGCATTCCTTTCTTTTGAAACAGAAGAAAGGAATGCAAACAGCAGGGAATTTAATGCCAGGCAAAGTGTAAACAG	cat5	KMAC-designed opening DE	Y	GAGTAAAT:-8.2,AAATGCCT:-8.3,GCCTGTCAAG:-17.7,CAAGAGTTAA:-24.8,TTAACTGC:-6.7,CTGCATT:-9.4,CATTCCT:-25.2,TCCTTTCT:-10.6,TTCTTT:-13.3,CTTTTGAA:-9.4,TGAAACAG:-5.9,ACAGAAGA:-5.3,AAGAAAGGA:-6.6,AGGAATGCA:-8.2,TGCAAACAG:-7.9,ACAGCAGGG:-5.2,AGGGAATTT:-6.4,ATTTAAT:-20.9,TAATGCCAGGCAA:-19.0,GCAAAGT:-5.4,AAGTGTAA:-5.1,GTAAACAGT:-5.8	82	37	0	0	550	636	218	221	370	564	77	131	1457	1443
ATCGAAAGGATGGGAGTACTAAGCTTCATCTCTTGACACACAGAGACAGGCCTTATCTTGCCTGGCATTAGGCTTGTTATCTGTGTGTGTGTGAAATTCACACTTTAGAGCTCTGTGAGTCAAGAGTCAGCACGGACAAAGTACTGAGAT	TCATCTCTTGACACACAGAGACAGGCCTTATCTTGCCTGGCATTAGGCTTGTTATCTGTGTGTGTGTGAAATTCACACTTTAGAGCTCTGTGAGTCAAGA	cat5	KMAC-designed opening DE	Y	TCATCTCT:-9.0,CTCTTGACA:-21.3,GACACACAG:-5.3,ACAGAGA:-18.1,GAGACAGG:-6.5,CAGGCCTTA:-17.9,CTTATCTT:-22.7,TCTTGCCTGGCA:-22.8,GGCATTAGGCT:-17.8,GGCTTGTTA:-13.8,GTTATCT:-23.7,ATCTGTGTG:-6.1,TGTGTGTGTGA:-5.5,GTGAAATTC:-21.6,ATTCAC:-5.4,TCACACTTTAG:-6.7,TTAGAGCTCTGTG:-12.2,TGTGAGTCA:-5.6,GTCAAGAGTTAAC:-21.3	3690	2759	2272	2026	3743	4122	4080	5536	2595	2589	3937	2142	1707	1995
ATCGAAAGGATGGGAGTACTAAGCTATACACACACACAAACATCAAAGGGACATTCCTTTGATCTTTTGAAGTATTTACCTTTGTTTGTCAAGAGTTAAAGTGTGAAAGAAACAATGTGAGTGTGGTCAGCACGGACAAAGTACTGAGAT	ATACACACACACAAACATCAAAGGGACATTCCTTTGATCTTTTGAAGTATTTACCTTTGTTTGTCAAGAGTTAAAGTGTGAAAGAAACAATGTGAGTGTG	cat5	KMAC-designed opening DE	Y	ATACACACACACA:-9.3,CACAAACAT:-5.8,ACATCAAAGG:-9.2,AAGGGACA:-6.7,GACATTCC:-6.2,TTCCTTTGA:-5.7,TTGATCTTT:-7.8,CTTTTGAAGT:-7.3,AAGTATTT:-7.7,ATTTAC:-47.4,TTACCTT:-5.9,CCTTTGTT:-10.9,TGTTTGTCA:-5.5,GTCAAGAGTTAA:-22.2,TTAAAGTGTGAA:-19.6,TGAAAGAAA:-5.1,GAAACAAT:-7.4,CAATGTG:-6.5,TGTGAGTGT:-6.9,GTGTGTGTGTG:-47.0	920	463	461	508	1276	1178	1107	1190	782	667	310	1057	68	164
ATCGAAAGGATGGGAGTACTAAGCTGATTATCTAAATTCTTTTCTTTGATCTCAGCAGGAATGTTATCCCTCTTCTGCTGTAAATTCCTTATCAGCTTAGTGTTAATAGCATTTAACTTCAAAGCGTCAGCACGGACAAAGTACTGAGAT	GATTATCTAAATTCTTTTCTTTGATCTCAGCAGGAATGTTATCCCTCTTCTGCTGTAAATTCCTTATCAGCTTAGTGTTAATAGCATTTAACTTCAAAGC	cat5	KMAC-designed opening DE	Y	GATTATC:-5.3,TATCTA:-10.9,TCTAAAT:-14.1,AAATTCT:-23.0,TTCTTTTCTTT:-10.5,CTTTGATCTC:-7.0,TCTCAGCAGG:-7.0,CAGGAAT:-12.4,GAATGTTA:-6.4,GTTATCCCT:-15.8,CCCTCTTCTG:-8.5,TCTGCTGTAA:-7.0,GTAAATTCCTT:-5.8,CCTTATC:-22.8,TATCAGCT:-7.2,AGCTTAGT:-5.9,TAGTGTTAATAG:-5.2,ATAGCAT:-7.5,GCATTTA:-6.2,TTTAACT:-11.3,AACTTCAAAG:-6.1,AAAGCAAAC:-10.9	1088	598	404	908	723	1052	1295	1742	789	855	466	1484	462	472
ATCGAAAGGATGGGAGTACTAAGCTAAATCATTTGTTTTTAGTGTTTCTTTGATCTGATGCCCTCTTCAAAAGAATTTAGATAAAAGCAAACACACACATACACAGCTCTGTGATAGCTGACATTGTCAGCACGGACAAAGTACTGAGAT	AAATCATTTGTTTTTAGTGTTTCTTTGATCTGATGCCCTCTTCAAAAGAATTTAGATAAAAGCAAACACACACATACACAGCTCTGTGATAGCTGACATT	cat5	KMAC-designed opening DE	Y	AAATCAT:-5.6,TCATTTG:-9.4,TTTGTTTTT:-10.2,TTTTA:-22.7,TTTAGTGTT:-9.0,TGTTTCTTT:-5.4,CTTTGATCT:-22.3,ATCTGATGCC:-5.8,TGCCCTCTTC:-5.5,CTTCA:-13.6,TTCAAAAGA:-5.8,AAGAATTTAG:-13.4,TTAGAT:-5.2,AGATAAAAG:-6.1,AAAGCAAACA:-8.4,AACACACACA:-11.8,CACATACAC:-6.0,ACACAGCT:-8.7,AGCTCTGTGATAG:-10.5,ATAGCTGAC:-8.7,TGACATTCC:-6.4	195	124	79	51	255	241	56	167	158	26	111	16	31	7
ATCGAAAGGATGGGAGTACTAAGCTCTTTGTAGTTAATCACAGAGCTCTGTGATAGCGCATTACTCACACCTGCTGTGTCAGCTATGTAACTGTGTAAACAGATAATCTTTTATCTGTGTGTGTGGTCAGCACGGACAAAGTACTGAGAT	CTTTGTAGTTAATCACAGAGCTCTGTGATAGCGCATTACTCACACCTGCTGTGTCAGCTATGTAACTGTGTAAACAGATAATCTTTTATCTGTGTGTGTG	cat5	KMAC-designed opening DE	Y	CTTTGTAGT:-7.0,TAGTTA:-12.9,GTTAATCA:-8.0,ATCACAGAGC:-12.9,GAGCTCTGTGA:-14.0,GTGATAGCGC:-8.5,GCGCATTAC:-9.9,TTACTCA:-10.8,CTCACACCT:-5.8,ACCTGCTG:-5.3,GCTGTGTCA:-5.5,GTCAGCTAT:-8.7,CTATGTA:-7.3,TGTAACTG:-5.4,ACTGTGT:-13.0,GTGTAA:-13.8,GTAAACAGA:-9.1,CAGATAAT:-5.7,TAATCTT:-10.1,TCTTTT:-13.9,TTTTATCTG:-5.2,TCTGTGTGTGT:-9.2,GTGTGTGTGC:-7.0	1515	939	677	1059	2319	3068	1824	3331	2044	1538	1523	1001	1751	2207
ATCGAAAGGATGGGAGTACTAAGCTTGTTTGCACAGAGCTCTAAATATTTACTCTGTTTACTGTTGTTAACTCTTTGATCAAAGGGATGTTGGTTTTGTGTGTGTGTATATGTTTACATAGCTGAGTCAGCACGGACAAAGTACTGAGAT	TGTTTGCACAGAGCTCTAAATATTTACTCTGTTTACTGTTGTTAACTCTTTGATCAAAGGGATGTTGGTTTTGTGTGTGTGTATATGTTTACATAGCTGA	cat5	KMAC-designed opening DE	Y	TGTTTGCACA:-7.0,CACAGAGCTCTAAA:-12.0,TAAATATTT:-9.9,ATTTACTC:-8.2,ACTCTGT:-9.7,CTGTTTACT:-10.7,TACTGTTG:-7.3,GTTGTTAACTCT:-21.3,CTCTTTGATC:-5.2,GATCAAAGG:-14.4,AAGGGA:-7.2,GGGATGTT:-5.2,TGTTGGTTT:-5.8,GTTTTGTGT:-5.8,GTGTGTGTGTAT:-9.6,GTATATGT:-7.3,ATGTTTACA:-25.9,TACATAG:-7.3,ATAG:-34.3,ATAG:-34.3,ATAGCTGAC:-8.7	1473	1089	1019	906	2267	2833	1130	1679	325	537	241	651	221	291
ATCGAAAGGATGGGAGTACTAAGCTGCATTTAGAGCTCTGTGTGTGTGTAAATATACATTCCTTTGTTTACAAATGTAAATTATCAGCTTTAAGGTTAACAAAGCAGGGGGTTGTTAACTCTTGAGTCAGCACGGACAAAGTACTGAGAT	GCATTTAGAGCTCTGTGTGTGTGTAAATATACATTCCTTTGTTTACAAATGTAAATTATCAGCTTTAAGGTTAACAAAGCAGGGGGTTGTTAACTCTTGA	cat5	KMAC-designed opening DE	Y	GCATTTA:-6.2,TTTAGAGCTCTGTG:-12.0,TGTGTGTGTGTA:-11.0,TGTAAATAT:-5.8,ATATACA:-12.9,TACATTC:-16.5,ATTCCTT:-13.5,CCTTTGTT:-10.9,TGTTTACAA:-8.5,ACAAATGT:-6.7,ATGTAAA:-32.0,TAAATT:-21.7,AATTATCAG:-5.2,TCAGCTTT:-8.4,CTTTAAGGTTAA:-18.1,TTAACAA:-14.7,ACAAAGCA:-14.7,AGCAGGGG:-8.1,GGGGGTTGTTA:-21.9,GTTAACTCTTGA:-23.1	502	340	212	228	385	370	849	822	1602	1257	394	1048	1440	1271
ATCGAAAGGATGGGAGTACTAAGCTTTGTGTTTAAGGTTAAATTCTTGCCTGGCATTAACACTTTAAGGTAAATTCCTTAAAGTGTGTGTGTGTGTGTGTGTTTGTTTGAAAGAAACAATAGCTGGTCAGCACGGACAAAGTACTGAGAT	TTGTGTTTAAGGTTAAATTCTTGCCTGGCATTAACACTTTAAGGTAAATTCCTTAAAGTGTGTGTGTGTGTGTGTGTTTGTTTGAAAGAAACAATAGCTG	cat5	KMAC-designed opening DE	Y	TTGTGTTTA:-5.2,TTTAAGGTTAAA:-18.1,TAAAT:-84.5,AAATTCTTG:-25.4,CTTGCCTGGCATT:-18.4,CATTA:-51.1,ATTAACAC:-10.2,ACACTTTAAGG:-19.0,AAGGTAA:-5.9,GTAAATTCCTT:-5.8,CCTTAAAGTGTG:-18.4,TGTGTGTGTGTGT:-46.7,GTGTGTGTGTT:-10.7,TGTTTGTTT:-21.0,GTTTGAA:-8.8,TGAAAGAAA:-5.1,GAAACAAT:-7.4,CAATAGCTG:-6.8	603	373	301	222	538	645	276	345	606	443	1049	731	434	517
ATCGAAAGGATGGGAGTACTAAGCTTTTGCTTTACTCTGTGAGACATCAGGGCTTGTTATCAAAGTGTGAAATTAGGCTGTGTGATTTGCTCTAAATTCCTGTGATGCCCTCTGTGATAATAGAGGTCAGCACGGACAAAGTACTGAGAT	TTTGCTTTACTCTGTGAGACATCAGGGCTTGTTATCAAAGTGTGAAATTAGGCTGTGTGATTTGCTCTAAATTCCTGTGATGCCCTCTGTGATAATAGAG	cat5	KMAC-designed opening DE	Y	TTTGCTTT:-19.3,CTTTA:-31.9,TTTACTCTG:-5.1,TCTGTGAG:-6.5,TGAGACA:-7.8,GACATCAG:-5.6,TCAGGGCT:-5.6,GGCTTGTTATC:-14.9,TATCAAAG:-6.1,AAAGTGTGAAATT:-21.9,AATTA:-23.9,ATTAGGCTG:-16.3,GCTGTGTG:-6.6,TGTGATTTG:-6.4,TTTGCTCT:-11.4,CTCTAAATTC:-13.1,ATTCCTGT:-6.1,CTGTGATG:-5.8,GATGCCCTCT:-7.3,CTCTGTGAT:-10.7,TGATAAT:-10.7,TAATAGA:-7.3,TAGAGATTA:-8.5	1507	877	689	1180	1203	1838	823	1113	1504	1214	1900	2545	635	928
ATCGAAAGGATGGGAGTACTAAGCTAGCAAACATTTACATTTATCTGTGCTATGTAAACATTCCATGTAAACAGTTACAAAGTGTTAATATTGACATTTATCTCTCTCTTCTGTCAAGAGTTAACGTCAGCACGGACAAAGTACTGAGAT	AGCAAACATTTACATTTATCTGTGCTATGTAAACATTCCATGTAAACAGTTACAAAGTGTTAATATTGACATTTATCTCTCTCTTCTGTCAAGAGTTAAC	cat5	KMAC-designed opening DE	Y	AGCAAACATT:-5.5,CATTTACA:-5.4,TACATTTA:-5.1,TTTATCTG:-14.7,TCTGTGCT:-6.3,TGCTATGT:-5.1,ATGTAAACAT:-17.5,ACATTCCAT:-7.3,CCATGTAA:-5.1,GTAAACAGT:-5.8,CAGTTACA:-5.4,TACAAAGTG:-5.8,AGTGTTAATA:-5.5,AATATTGAC:-5.2,TGACATTT:-5.6,ATTTA:-84.5,TTTATCTC:-11.4,TCTCTCTCTT:-5.1,TCTTCTGT:-5.3,CTGTCAAGA:-21.3,AAGAGTTAACA:-22.2	912	531	366	692	1656	1796	547	629	1073	744	1846	954	1016	933
ATCGAAAGGATGGGAGTACTAAGCTTAAACACAAATATTTACATTCTTTTGTTTACATTAGGGAATTTCACACTTTATTTAAAAGCATCAGGAATGTAAATATTTGTTTACTGTTGACTTTGTTTGTCAGCACGGACAAAGTACTGAGAT	TAAACACAAATATTTACATTCTTTTGTTTACATTAGGGAATTTCACACTTTATTTAAAAGCATCAGGAATGTAAATATTTGTTTACTGTTGACTTTGTTT	cat5	KMAC-designed opening DE	Y	TAAACACAA:-5.2,ACAAATATT:-6.4,TATTTACAT:-5.2,ACATTCT:-15.3,TTCTTTTG:-12.0,TTTGTTTAC:-8.2,TTACATTAGGG:-14.3,AGGGAATTT:-6.4,ATTTCACACTTTA:-21.0,TTTATTTAA:-5.5,TTAAAAGCATCAGG:-19.0,CAGGAATGT:-7.7,ATGTAAAT:-6.5,AAATA:-56.2,AATATTTGT:-6.4,TTGTTTACT:-6.1,TACTGTTG:-7.3,GTTGACTTT:-5.8,CTTTGTT:-23.2,TGTTTGGTTT:-5.2	209	14	132	80	322	713	230	355	419	152	767	435	450	550
ATCGAAAGGATGGGAGTACTAAGCTCTGAGTCACACACACACACACACATACACACACACAGATAAATGTAAACATTTAATTAACACACACACCAGATGGATGTTTGCAAACATACCATTCACACGTCAGCACGGACAAAGTACTGAGAT	CTGAGTCACACACACACACACACATACACACACACAGATAAATGTAAACATTTAATTAACACACACACCAGATGGATGTTTGCAAACATACCATTCACAC	cat5	KMAC-designed opening DE	Y	CTGAGTCA:-8.5,GTCACACA:-7.1,CACACACACACAC:-44.1,ACACACATACACA:-6.4,CACACACACAGA:-10.2,CAGATAAATG:-8.2,AATGTA:-28.5,TGTAAACATT:-25.1,CATTTAATTA:-13.7,ATTAACAC:-10.2,ACACACACACC:-10.3,CACCAGATGG:-5.1,ATGGATGT:-5.1,ATGTTTGCA:-5.5,TGCAAACAT:-5.5,ACATACC:-6.7,TACCATTC:-5.1,ATTCACACT:-6.7	485	447	426	486	556	733	248	322	528	587	1046	773	337	292
ATCGAAAGGATGGGAGTACTAAGCTTCACAGAGCTCTGTGTGTGTTGGTTTTCTTAGGTCTGTTATCTTTTAATCCCTAATGTAAACATTTAATCTTGTCTATAAATGTAAATCAAAGAACAATGGTCAGCACGGACAAAGTACTGAGAT	TCACAGAGCTCTGTGTGTGTTGGTTTTCTTAGGTCTGTTATCTTTTAATCCCTAATGTAAACATTTAATCTTGTCTATAAATGTAAATCAAAGAACAATG	cat5	KMAC-designed opening DE	Y	TCACAGAGCTC:-14.0,GCTCTGTGTG:-5.2,TGTGTGTTGG:-5.5,TTGGTTT:-7.2,GTTTTCTTA:-5.5,CTTAGGTCT:-11.1,GTTATC:-29.4,TATCT:-61.3,ATCTTTTA:-5.8,TTTAATCCC:-6.7,TCCCTAATGTAA:-14.3,GTAAACATTTAA:-13.4,TTAATCTT:-5.1,TCTTGTCT:-13.9,ATAAATGT:-10.8,ATGTAAAT:-6.5,AAATCAAAG:-5.2,AAAGAACAA:-5.9,ACAATGGC:-7.6	517	62	106	187	569	979	857	907	665	492	502	557	543	554
ATCGAAAGGATGGGAGTACTAAGCTAAAGAAGCCAGGCAAACAGGCCTTAGGTCTATCTGTTTGCTCAGGGGGTTACCTCTGTGATAACTGGTTTGGTGTGTGTGTTAATATTTGCTCAGCAGAGGTCAGCACGGACAAAGTACTGAGAT	AAAGAAGCCAGGCAAACAGGCCTTAGGTCTATCTGTTTGCTCAGGGGGTTACCTCTGTGATAACTGGTTTGGTGTGTGTGTTAATATTTGCTCAGCAGAG	cat5	KMAC-designed opening DE	Y	AAAGAA:-13.3,AGAAGCCA:-5.1,GCCAGGCAA:-20.1,GCAAACAGG:-8.7,CAGGCCTTA:-17.9,CTTAG:-10.2,TTAGGTCTA:-7.6,TCTATCTG:-6.5,TCTGTTTGC:-8.8,TTGCTCAG:-10.7,TCAGGGGGT:-20.9,GGGTTACCTC:-5.2,CCTCTGTGA:-5.1,GTGATAAC:-5.9,TAACTGGT:-6.4,TGGTTTGGT:-5.5,TGGTGTGTGTGT:-5.6,GTGTTAATA:-5.8,AATATTTGC:-8.2,TTGCTCAG:-10.7,TCAGCAGAG:-5.1	1489	1288	450	727	1405	1656	811	1247	1280	1626	878	1355	922	1118
ATCGAAAGGATGGGAGTACTAAGCTAGGAACAAAGAGAGATAAATATTTCAAAGGGCTTGTTATCCCTAAATTTCACAGAGCTCTAAGTCAAAGGGACTAAGAATGTAATAAAGTGTGAAAACAAGTCAGCACGGACAAAGTACTGAGAT	AGGAACAAAGAGAGATAAATATTTCAAAGGGCTTGTTATCCCTAAATTTCACAGAGCTCTAAGTCAAAGGGACTAAGAATGTAATAAAGTGTGAAAACAA	cat5	KMAC-designed opening DE	Y	AGGAACAAAG:-5.2,AAAGAGAGA:-7.9,GAGATAAA:-11.4,TAAATATT:-15.7,TATTTCAA:-5.9,TCAAAGGGC:-5.1,GGGCTTGTTAT:-15.5,TTATCCCTAA:-14.9,CTAAATT:-9.3,AATTTCACA:-22.2,CACAGAGCTCTAA:-12.2,CTAAGTCAA:-5.5,TCAAAGGG:-13.4,AGGGACTAA:-8.7,CTAAGAA:-14.2,AGAATGTAA:-5.5,GTAATAAA:-5.3,TAAAGTGTGAAA:-22.8,GAAAACAAAC:-5.2	341	304	819	478	232	294	102	31	794	619	1747	1004	155	240
ATCGAAAGGATGGGAGTACTAAGCTTAGAGATTAGTGTTAATGGCTGTTGTTAACCTTAAAGTATTTCACACTTTAACCTTAAATGTTTGTGTGTGTGAATTTCAAAGGGAATGGTAAACACATAGTCAGCACGGACAAAGTACTGAGAT	TAGAGATTAGTGTTAATGGCTGTTGTTAACCTTAAAGTATTTCACACTTTAACCTTAAATGTTTGTGTGTGTGAATTTCAAAGGGAATGGTAAACACATA	cat5	KMAC-designed opening DE	Y	TAGAGATTAG:-7.6,TTAGTGTTAAT:-5.5,TAATGGC:-5.3,TGGCTGTTG:-6.4,GTTGTTAAC:-22.2,TAACCTTAAAGT:-18.1,AAGTATTT:-7.7,ATTTCACACTTTA:-21.0,TTTAACCTTAAA:-18.1,TAAATGT:-27.4,ATGTTTGTG:-5.8,TGTGTGTGTGA:-5.5,GTGAATTTC:-6.4,TTTCAAAGG:-5.1,AAGGGAAT:-8.9,GAATGGTA:-5.1,GGTAAACAC:-5.8,ACACATACACAC:-5.9	112	113	36	70	468	506	175	200	370	380	55	56	289	412
ATCGAAAGGATGGGAGTACTAAGCTGTTTGTCTTAGATAAAAACAAAAGACAAACATTCCTTTGACAGAGGTCAAGAGTTAACAACCCCTGATGCTTTATTTGTTTGTTATCTGTGCTTTCAAACGTCAGCACGGACAAAGTACTGAGAT	GTTTGTCTTAGATAAAAACAAAAGACAAACATTCCTTTGACAGAGGTCAAGAGTTAACAACCCCTGATGCTTTATTTGTTTGTTATCTGTGCTTTCAAAC	cat5	KMAC-designed opening DE	Y	GTTTGTCTT:-5.5,TCTTA:-22.0,CTTAGATA:-5.5,GATAAA:-17.4,TAAAAACAA:-5.9,ACAAAAGA:-9.4,AAGACAAAC:-5.5,AAACATTCC:-5.6,TTCCTTTGA:-5.7,TTGACAGAG:-5.5,AGAGGTCA:-10.8,GTCAAGAGTT:-20.3,AGTTAACAACCCC:-21.6,CCCCTGATGCTTT:-19.9,CTTTA:-31.9,TTTATTTG:-5.9,TTTGTTTGTT:-8.3,TGTTATCTG:-7.0,TCTGTGCT:-6.3,TGCTTTC:-15.3,TTTCAAACA:-6.7	736	392	365	477	543	578	611	909	1749	1194	1738	599	726	1038
ATCGAAAGGATGGGAGTACTAAGCTGTGTCAACAATGCTTTTAACCTTAAAGTGACTCAGCAGATAAACAGAGATAAGAATTCTTGCTCAGCTTTGAAAGAAGCCAGGCAAGAATTTCAGCTTTGGTCAGCACGGACAAAGTACTGAGAT	GTGTCAACAATGCTTTTAACCTTAAAGTGACTCAGCAGATAAACAGAGATAAGAATTCTTGCTCAGCTTTGAAAGAAGCCAGGCAAGAATTTCAGCTTTG	cat5	KMAC-designed opening DE	Y	GTGTCAACA:-5.5,AACAATGC:-7.7,ATGCTTTTAACC:-18.7,AACCTTAAAGTG:-18.1,AGTGACTCA:-5.8,CTCAGCAG:-6.9,GCAGATAA:-6.0,ATAA:-111.3,ATAAACAGA:-5.1,CAGAGATAAG:-6.1,TAAGAATT:-13.7,AATTC:-20.9,ATTCTTGC:-22.0,TTGCTCAG:-10.7,TCAGCTTT:-8.4,CTTTGAA:-21.0,TGAAAGAAG:-5.8,GAAGCCAG:-5.7,CCAGGCAAG:-17.8,CAAGAATTTCA:-21.6,TTCAGCTTT:-5.2,CTTTGATCTG:-5.8	1116	531	689	517	553	594	319	713	2559	1888	1589	2067	686	1154
ATCGAAAGGATGGGAGTACTAAGCTTCAAAGCAAACAGAGAAAGGAATGCAGATAAAGCAAAGCTTTGTTAACTCTTGACACACACCTGTCAAGAAAAGAAAGCAAACACATTCTTTTTTCTTTTGTCAGCACGGACAAAGTACTGAGAT	TCAAAGCAAACAGAGAAAGGAATGCAGATAAAGCAAAGCTTTGTTAACTCTTGACACACACCTGTCAAGAAAAGAAAGCAAACACATTCTTTTTTCTTTT	cat5	KMAC-designed opening DE	Y	TCAAAGCA:-7.3,AGCAAACAG:-12.3,ACAGAGAAA:-6.3,GAAAGGAA:-14.4,GGAATGCAG:-7.0,GCAGATAA:-6.0,ATAAAGCA:-8.7,AGCAAAGCT:-5.1,AGCTTTGT:-6.1,TTGTTAACTCT:-21.9,CTCTTGACA:-21.3,GACACACAC:-6.3,ACACCTGT:-7.2,CTGTCAAGA:-21.3,AAGAAAAGAAA:-10.5,GAAAGCAAA:-7.3,CAAACACAT:-5.3,ACATTCTT:-14.5,TCTTTTTT:-9.1,TTTTCTTTTT:-6.5	407	345	114	107	1022	1301	968	1580	796	662	399	536	1918	2499
ATCGAAAGGATGGGAGTACTAAGCTAGATTAAGGTTAAAAGCATTTACATTCCTTATCTCTGTTTCTCTGTGTAAACCAAACATTTATCTCTCAGCAGCTGTGACAAAGTCATTCCTTTTGATGTGTCAGCACGGACAAAGTACTGAGAT	AGATTAAGGTTAAAAGCATTTACATTCCTTATCTCTGTTTCTCTGTGTAAACCAAACATTTATCTCTCAGCAGCTGTGACAAAGTCATTCCTTTTGATGT	cat5	KMAC-designed opening DE	Y	AGATTAAG:-5.1,TAAGGTTAAAAGCAT:-18.4,GCATTTA:-6.2,TTTACATTC:-5.5,ATTCCTTA:-5.3,CTTATCTC:-10.7,TCTCTGTTT:-9.2,GTTTCTCTGT:-5.6,CTGTGTAAA:-6.1,TAAAC:-54.7,AAACCAAACA:-5.2,AACATTTAT:-9.3,TTAT:-111.3,TTATCTC:-31.8,TCTCTCA:-10.1,CTCAGCAG:-6.9,GCAGCTGTG:-9.3,TGTGACAA:-7.7,ACAAAGTC:-5.6,AGTCATTCC:-6.1,TTCCTTTTG:-6.1,TTTGATGTG:-7.7	1400	713	877	1686	2399	2651	1883	3411	2089	1602	4225	3992	1256	1484
ATCGAAAGGATGGGAGTACTAAGCTTTCAAACAGAGATAACAAGCCCTGCCTGGCATTCCACAGGCTGAGCTCTAAATGTCATTAACACTATCACAGAGCTCTGTGACACAAACATACCATTCCTGTCAGCACGGACAAAGTACTGAGAT	TTCAAACAGAGATAACAAGCCCTGCCTGGCATTCCACAGGCTGAGCTCTAAATGTCATTAACACTATCACAGAGCTCTGTGACACAAACATACCATTCCT	cat5	KMAC-designed opening DE	Y	TTCAAAC:-8.8,AAACAGAGA:-9.2,GAGATAA:-31.8,ATAACAAGCCC:-15.5,GCCCTGCCT:-8.9,GCCTGGCAT:-18.3,GCATTCCA:-8.2,TCCACAGG:-7.3,CAGGCTGAGC:-5.8,GAGCTCTAAAT:-13.7,AAATGTCA:-5.6,GTCATTAA:-6.4,TTAACACTA:-7.3,ACTATC:-10.3,TATC:-69.5,TATCACAGAG:-12.3,AGAGCTCTGTGA:-13.7,GTGACACA:-6.0,CACAAACAT:-5.8,ACATACC:-6.7,TACCATTC:-5.1,ATTCCTGGA:-6.1	2562	1762	2123	1794	2060	1791	496	853	3045	2374	2301	2487	1011	983
ATCGAAAGGATGGGAGTACTAAGCTTTTGATGTTTACAAATGAGTCACAGGATCAGCCTAATCTCTAAATTCTTAGTGTTAATTGATGTGTGTGTTTCTAAATGTGATAAATGTAAATGAGTCACGTCAGCACGGACAAAGTACTGAGAT	TTTGATGTTTACAAATGAGTCACAGGATCAGCCTAATCTCTAAATTCTTAGTGTTAATTGATGTGTGTGTTTCTAAATGTGATAAATGTAAATGAGTCAC	cat5	KMAC-designed opening DE	Y	TTTGATGT:-11.1,ATGTTTACAA:-5.5,ACAAATGA:-5.6,ATGAGTCAC:-6.7,TCACAGGA:-6.9,AGGATCAGCCTAA:-19.6,CTAATCTCTA:-7.6,TCTAAAT:-14.1,AAATTCTTAG:-13.1,TTAGTGTTAAT:-5.5,TAATTG:-7.5,ATTGA:-7.8,TTGATGTG:-8.5,TGTGTGTGTTT:-6.5,GTTTCTA:-5.2,TCTAAAT:-14.1,AAATG:-26.3,AATGTGAT:-5.5,TGATA:-37.5,GATAAATGT:-10.5,ATGTA:-32.9,TGTAAATG:-5.4,AATGAGTC:-5.7,AGTCACA:-8.5	693	427	330	280	832	773	968	797	654	399	525	223	400	440
ATCGAAAGGATGGGAGTACTAAGCTCCCTAATGTAAATATTAACACTAAAGTAATGCGCATTACTTTGTTCTCCTGCTGAAATTCACAGAGCTGACATTCCTTTTGAAAGTCAACAGCTGATCCTGTCAGCACGGACAAAGTACTGAGAT	CCCTAATGTAAATATTAACACTAAAGTAATGCGCATTACTTTGTTCTCCTGCTGAAATTCACAGAGCTGACATTCCTTTTGAAAGTCAACAGCTGATCCT	cat5	KMAC-designed opening DE	Y	CCCTAATGTAA:-14.3,GTAAATATT:-9.9,TATTAACACTA:-5.2,ACTAA:-20.2,CTAAAGTA:-7.6,AGTAATGCGC:-9.9,GCGCATTACT:-9.9,TACTTTG:-6.1,TTTGTTCTC:-5.4,TCTCCT:-8.0,TCCTGCTGA:-6.4,CTGAAATTCAC:-5.5,TCACAGAGCT:-15.8,AGCTGACA:-5.1,GACATTCC:-6.2,TTCCTTTTGA:-5.2,TTGAAAG:-12.0,AAAGTCAAC:-5.8,CAACAGCTG:-5.1,GCTGATCCT:-21.8	404	221	261	252	835	1111	439	823	776	623	906	352	1215	1322
ATCGAAAGGATGGGAGTACTAAGCTGCCTTTGATCCTGTGACTTTCTTTTCTTTCAGGGGGGTTGTTAAATCATCTGTGTTATCTCTTGACAGATCAAAGTTAACACTAAAGAATGTAGTGAATGGTCAGCACGGACAAAGTACTGAGAT	GCCTTTGATCCTGTGACTTTCTTTTCTTTCAGGGGGGTTGTTAAATCATCTGTGTTATCTCTTGACAGATCAAAGTTAACACTAAAGAATGTAGTGAATG	cat5	KMAC-designed opening DE	Y	GCCTTTGATC:-5.6,GATCCTGT:-6.7,CTGTGAC:-6.6,TGACTTTC:-5.2,TTTCTTTTCTT:-10.5,TCTTTCAG:-5.3,TCAGGGGG:-8.8,GGGGGTTGTTA:-21.9,GTTAAAT:-6.7,AAATCAT:-5.6,TCATCTGT:-5.5,CTGTGTTA:-6.4,GTTATCTCT:-6.7,CTCTTGACAG:-21.9,ACAGATCAA:-5.8,TCAAAGT:-6.6,AAGTTAA:-9.7,TTAACACTAAAG:-5.8,AAAGAAT:-5.4,GAATGTAG:-5.9,TGAAT:-24.9,GAATGTC:-9.8	1837	1465	1771	1474	1453	1574	1004	1455	1082	1117	591	539	373	377
ATCGAAAGGATGGGAGTACTAAGCTCTGTTTCAGCTTTGAAGAGGGCATTCCTGATGCTTTTAACACTAAGTCACAGGTGTGAGTGTGAGTGTGTGACTCATCAAAGGCATTCTTATCTCTGTTTGTCAGCACGGACAAAGTACTGAGAT	CTGTTTCAGCTTTGAAGAGGGCATTCCTGATGCTTTTAACACTAAGTCACAGGTGTGAGTGTGAGTGTGTGACTCATCAAAGGCATTCTTATCTCTGTTT	cat5	KMAC-designed opening DE	Y	CTGTTTCA:-5.9,TTCAGCTT:-7.6,GCTTTGAAG:-12.5,GAAGAGGGCAT:-5.6,GCATTCCTG:-6.1,CCTGATGCTTTTAA:-19.0,TTAAC:-67.3,TAACACTAA:-8.2,CTAAGTCA:-5.1,GTCACAG:-6.6,ACAGGTGTG:-5.1,TGTGAGTGT:-6.9,GTGTGAGTGTG:-5.2,TGTGTGACT:-5.9,GACTCATCA:-5.2,ATCAAAGG:-16.2,AAGGCATT:-5.2,CATTCTTA:-5.1,CTTATCTCTG:-6.1,TCTGTTTAC:-9.1	1180	1108	757	1362	2117	2410	1253	1330	844	1321	4030	1975	1219	1484
ATCGAAAGGATGGGAGTACTAAGCTAGATTAGCACAGAGGTCAGGAATGTAGATATACAAAGCAAACAAACATATCACAGGGCCCTGCCTAATGCCATTATCCTCTGTGACTCATGTGCTAAAGTGTCAGCACGGACAAAGTACTGAGAT	AGATTAGCACAGAGGTCAGGAATGTAGATATACAAAGCAAACAAACATATCACAGGGCCCTGCCTAATGCCATTATCCTCTGTGACTCATGTGCTAAAGT	cat5	KMAC-designed opening DE	Y	AGATTAGCA:-8.7,AGCACAGA:-6.3,CAGAGGTCA:-5.2,GTCAGGAA:-5.9,GGAATGTAG:-5.9,ATATACA:-12.9,TACAAA:-20.4,CAAAGCAAAC:-5.8,AAACAAACAT:-5.8,ACATATCA:-6.4,ATCACAGGGCCC:-5.8,GCCCTGCCT:-8.9,GCCTAATGCCA:-17.8,GCCATTA:-5.3,ATTATC:-17.2,TATCCTCT:-5.4,CTCTGTGA:-15.6,GTGACTCAT:-6.7,TCATGTGC:-5.2,GTGCTAA:-17.4,CTAAAGTGTGAA:-6.4	1573	830	689	609	1623	1712	854	1271	1609	1552	1328	1132	1490	1588
ATCGAAAGGATGGGAGTACTAAGCTTGGAATGTTTCTAAATATTGACAGGCCCTGTGTGTATATGTAAATTCTTTTCTTTAGTGTTTACTGGAACTCTGTTTCACACATACACAGATAACTCTTGGTCAGCACGGACAAAGTACTGAGAT	TGGAATGTTTCTAAATATTGACAGGCCCTGTGTGTATATGTAAATTCTTTTCTTTAGTGTTTACTGGAACTCTGTTTCACACATACACAGATAACTCTTG	cat5	KMAC-designed opening DE	Y	TGGAA:-11.7,GGAATGTTT:-5.6,GTTTCTA:-5.2,TCTAAAT:-14.1,AAATA:-56.2,AATATTGAC:-5.2,TGACAGGCC:-19.4,GGCCCTGTG:-6.0,TGTGTGTAT:-9.3,GTATATGT:-7.3,ATGTAAAT:-6.5,AAATTCT:-23.0,TTCTTTTCTTT:-10.5,CTTTAGTGTT:-6.4,TGTTTACTG:-9.9,ACTGGAACTC:-5.3,ACTCTGT:-9.7,CTGTTTCA:-5.9,TTCACA:-34.5,CACACATACAC:-5.6,ACACAGA:-19.5,CAGATAAC:-10.1,TAACTCTTGAC:-22.2	1951	1361	1369	1575	980	1097	400	576	2418	2416	2669	3733	696	680
ATCGAAAGGATGGGAGTACTAAGCTAAACTGCTGTGTGTATGTGAGTGCTAATCTTATCTCTCTGTTTCAAAGGGATTAAATGTTTACATTTGTAACTGGAACTCTCCAGTGTATGTGTGTGCCTGTCAGCACGGACAAAGTACTGAGAT	AAACTGCTGTGTGTATGTGAGTGCTAATCTTATCTCTCTGTTTCAAAGGGATTAAATGTTTACATTTGTAACTGGAACTCTCCAGTGTATGTGTGTGCCT	cat5	KMAC-designed opening DE	Y	AAACTGCT:-5.7,TGCTGTGTG:-6.5,TGTGTATGTG:-7.2,TGTGAGTG:-7.3,AGTGCTAA:-7.5,CTAATCTT:-8.7,TCTTATCT:-14.3,ATCT:-87.1,ATCTCTC:-8.5,TCTCTGT:-18.1,CTGTTTCA:-5.9,TTCAAA:-37.3,CAAAGGGA:-8.7,GGGATTAAA:-6.7,TAAATGTT:-24.6,TGTTTACATT:-19.2,CATTTGTA:-6.6,TGTAACTG:-5.4,ACTGGAACTC:-5.3,ACTCTCCAG:-6.3,CCAGTGT:-7.4,GTGTATGTGTG:-5.6,TGTGTGCCT:-5.4	1424	1215	882	2162	3082	3059	1038	1588	2139	2040	3166	4848	1920	2016
ATCGAAAGGATGGGAGTACTAAGCTTGTGTGTGTCACAGGGCCTTAAGGTTAAAAGCAAACATTTACTCTGTTTGCAAGTAATGTCTCTCTCTGTGTGACTCACTGTTTGCTTTGATCTGTTTACGTCAGCACGGACAAAGTACTGAGAT	TGTGTGTGTCACAGGGCCTTAAGGTTAAAAGCAAACATTTACTCTGTTTGCAAGTAATGTCTCTCTCTGTGTGACTCACTGTTTGCTTTGATCTGTTTAC	cat5	KMAC-designed opening DE	Y	TGTGTGTGT:-49.8,GTGTCAC:-8.3,TCACAGGGCC:-7.0,GGCCTTAAG:-18.8,TAAGG:-11.5,AAGGTTAAAAG:-18.7,AAAGCAAA:-19.3,CAAACATTT:-7.0,ATTTACTC:-8.2,ACTCTGT:-9.7,CTGTTTGCA:-7.9,TGCAAGTA:-6.4,AGTAATGT:-7.5,ATGTCTCT:-6.2,CTCTCTCTGT:-5.1,CTGTGTGA:-5.8,GTGACTCA:-8.3,CTCACTGTT:-5.6,TGTTTGCTT:-15.3,GCTTTGA:-16.1,TTGATCTG:-7.3,TCTGTTTACA:-5.5	3387	2831	3326	3325	4944	4506	3213	4275	1926	1641	2250	2366	1113	1195
ATCGAAAGGATGGGAGTACTAAGCTTTTACACACTTTAAGAAAACAATGGATGTGTTTGATGTAAACAATATCACACACACTCACAGTGACACATTCCAGCTGGTGTGTATGTGATAGCTGACCTGTCAGCACGGACAAAGTACTGAGAT	TTTACACACTTTAAGAAAACAATGGATGTGTTTGATGTAAACAATATCACACACACTCACAGTGACACATTCCAGCTGGTGTGTATGTGATAGCTGACCT	cat5	KMAC-designed opening DE	Y	TTTACACA:-8.5,CACACTTTAAG:-18.7,TAAGAAAAC:-5.5,AAACAATGG:-5.1,ATGGATGT:-5.1,ATGTGTTTG:-5.3,TTTGATGT:-11.1,ATGTA:-32.9,TGTAAACA:-38.0,AACAATAT:-6.0,ATATCACA:-5.2,CACACACACTCA:-5.8,CTCACAG:-11.6,ACAGTGA:-8.1,GTGACACA:-6.0,CACATTCCA:-8.0,TCCAGCTGG:-5.1,CTGGTGTGT:-5.1,GTGTATGTG:-6.0,TGTGATAG:-13.0,ATAGCTGAC:-8.7,TGACCTCA:-8.7	1629	1272	1084	1101	2081	2143	1668	1774	1499	1324	2845	1517	903	982
ATCGAAAGGATGGGAGTACTAAGCTTCTTAGGTCCTGCTGTAAATTCCTTATCTTGTTAACTCTCCAGACAAATGACTCACACTTTAAGGTTAAAAGTATACTTTGATCAAAGGCCTGTCAAGAGGTCAGCACGGACAAAGTACTGAGAT	TCTTAGGTCCTGCTGTAAATTCCTTATCTTGTTAACTCTCCAGACAAATGACTCACACTTTAAGGTTAAAAGTATACTTTGATCAAAGGCCTGTCAAGAG	cat5	KMAC-designed opening DE	Y	TCTTAGGTC:-9.5,CTGCTGTAA:-6.6,GTAAATTCCTT:-5.8,CCTTATCT:-16.8,ATCTTGT:-7.9,TTGTTAACTC:-23.1,ACTCTCCAG:-6.3,CCAGACAA:-5.6,ACAAATGA:-5.6,ATGACTCAC:-6.4,TCACACTTTAAG:-18.7,TAAGGTTAAAAG:-18.7,AAAGTATA:-5.2,TATACTTT:-5.2,CTTTGATC:-28.8,GATCAAAGG:-14.4,AAGGCCTGTCA:-21.6,GTCAAGAGTTAAC:-21.3	1122	789	471	980	1388	1460	940	549	1103	735	645	1278	460	501
ATCGAAAGGATGGGAGTACTAAGCTGAATGTGACTTTAAGGTTAAAAGTCAAAGGGATAACAAAAGAATGGAATGTAAACAGAGAATGTAATTACCATTCCCTTTGTTCTCTTTGAGATAAGAGAGTCAGCACGGACAAAGTACTGAGAT	GAATGTGACTTTAAGGTTAAAAGTCAAAGGGATAACAAAAGAATGGAATGTAAACAGAGAATGTAATTACCATTCCCTTTGTTCTCTTTGAGATAAGAGA	cat5	KMAC-designed opening DE	Y	GAATGTG:-12.1,TGTGACTTT:-5.5,CTTTAAGGTTAAAA:-18.1,AAAAGTCAA:-6.1,TCAAAGGGA:-7.9,GGGATAACA:-15.8,AACAAAAG:-5.6,AAAGAATGG:-5.1,ATGGAATGT:-7.3,ATGTAAACAG:-5.2,ACAGAGAA:-9.7,AGAATGTAA:-5.5,GTAATTA:-10.0,ATTACC:-5.2,TACCATTC:-5.1,ATTCCCTTTG:-6.7,TTTGTTCTC:-5.4,TCTCTTTGA:-7.9,TTGAGATA:-5.1,GATAAGA:-15.3,AAGAGAT:-7.1	716	392	504	730	439	563	1515	1466	5421	4791	5516	2343	1578	2084
ATCGAAAGGATGGGAGTACTAAGCTTTGTAAACATTCCCTTTGTCTATCACAGGATCAAAGTAAACAATGCCAGGCCTGTCAATTAGTCAAGAGTTAACAACTGTCCCCTAATGTAAACATTCCAGTCAGCACGGACAAAGTACTGAGAT	TTGTAAACATTCCCTTTGTCTATCACAGGATCAAAGTAAACAATGCCAGGCCTGTCAATTAGTCAAGAGTTAACAACTGTCCCCTAATGTAAACATTCCA	cat5	KMAC-designed opening DE	Y	TTGTAAACA:-8.5,AACATTCC:-12.0,TTCCCTTTG:-5.2,TTTGTCT:-6.3,ATCACAG:-13.1,ACAGGA:-14.8,AGGATCAAAG:-5.8,AAAGTAAACA:-7.0,AACAATGC:-7.7,ATGCCAGGC:-18.3,AGGCCTGTCAA:-22.2,TCAAT:-7.8,CAATTA:-7.5,ATTAGTCA:-6.1,GTCAAGAGTT:-20.3,AGTTAACAAC:-21.9,CAACTGT:-7.9,CTGTCCCCT:-6.7,CCCTAATGTAAA:-14.3,TAAAC:-54.7,AAACATTCC:-5.6,TTCCATTC:-5.7	1229	1189	767	1334	1386	1638	515	587	1046	1041	1733	2162	644	545
ATCGAAAGGATGGGAGTACTAAGCTCCCTGTCTCTCTTTGAAGTTAAATCACAAAGAGTAAATTCCTGTTTACATCAAAGGAATTTACCTGTCTCTGTCAAGAGTTAACTCTGTCAGGAATGTTTGTCAGCACGGACAAAGTACTGAGAT	CCCTGTCTCTCTTTGAAGTTAAATCACAAAGAGTAAATTCCTGTTTACATCAAAGGAATTTACCTGTCTCTGTCAAGAGTTAACTCTGTCAGGAATGTTT	cat5	KMAC-designed opening DE	Y	CCCTGTCTC:-5.3,TCTCTCTTT:-7.9,CTTTGAAGTT:-6.1,AGTTAAA:-11.3,TAAAT:-84.5,AAATCACAAA:-5.8,CAAAGAG:-12.8,AGAGTAAA:-6.7,TAAATTC:-10.0,ATTCCTGT:-6.1,CTGTTTACA:-9.8,TACATCAA:-5.1,TCAAAGGAA:-5.7,GGAATTTA:-6.7,TTTACCTG:-7.1,CCTGTCTCT:-5.5,CTCTGTCA:-7.1,GTCAAGAGTTAAC:-21.3,TAACTCT:-14.1,CTCTGTCA:-7.1,GTCAGGAA:-5.9,GGAATGTTT:-5.6	629	525	333	183	1930	1908	1633	2052	956	822	1081	219	1978	2443
ATCGAAAGGATGGGAGTACTAAGCTACTGCCATCTGATGCCCTAATGTAAACACTTTAAGGTATTTAATGTAAAAGCACTGTTGACTCATCAAAGGAAAGTATTTAATGTAAACACAAAGCTGAAGTCAGCACGGACAAAGTACTGAGAT	ACTGCCATCTGATGCCCTAATGTAAACACTTTAAGGTATTTAATGTAAAAGCACTGTTGACTCATCAAAGGAAAGTATTTAATGTAAACACAAAGCTGAA	cat5	KMAC-designed opening DE	Y	ACTGCCATCT:-5.2,ATCTGATGCCCT:-5.5,CCCTAATGTAA:-14.3,GTAAACACT:-8.7,CACTTTAAGGT:-18.7,AGGTATTT:-5.9,ATTTAA:-27.7,TTAAT:-36.3,TAATG:-51.1,AATGTAAA:-27.3,TAAAAGCA:-5.8,AGCACTGT:-6.9,CTGTTGACT:-6.6,GACTCATCA:-5.2,ATCAAAGGA:-7.2,AGGAAAGT:-5.5,AAGTATTT:-7.7,ATTTAAT:-20.9,TAATGTAAA:-19.0,TAAACACAA:-5.2,ACAAAGC:-17.6,AAGCTGAA:-7.6	584	499	61	92	403	551	381	212	479	324	722	329	118	259
ATCGAAAGGATGGGAGTACTAAGCTTGACTTATCTCATCTGATGCCCTCTTCTTTTTTGTCATTCCTTTGCTCTTGACAAAGAAAAGAACATTTAATCTCTCTCTTTTGAAATTCTTGACAGGCCGTCAGCACGGACAAAGTACTGAGAT	TGACTTATCTCATCTGATGCCCTCTTCTTTTTTGTCATTCCTTTGCTCTTGACAAAGAAAAGAACATTTAATCTCTCTCTTTTGAAATTCTTGACAGGCC	cat5	KMAC-designed opening DE	Y	TGACTTA:-7.3,CTTATCTCA:-7.9,CTCATCT:-5.6,ATCTGATGCCCT:-5.5,CCCTCTTCT:-8.0,TTCTTTTTT:-12.4,TTTTGTCA:-7.2,GTCATTCCT:-5.5,TCCTTTG:-11.4,TTTGCTCT:-11.4,CTCTTGACA:-21.3,GACAAAG:-5.9,AAAGAAAAG:-7.1,AAAGAACA:-8.9,AACATTTAA:-15.5,TTAATCTC:-5.1,TCTCTCTCTT:-5.1,TCTTTTGAA:-5.8,TGAAATTCTTG:-21.6,CTTGACAGGC:-17.7,AGGCCTTAAG:-20.3	1523	1536	1731	2140	3284	3129	1653	2498	2594	2085	2940	4008	1927	1815
ATCGAAAGGATGGGAGTACTAAGCTGCAAACACCTTGTGTTTGTGAGTGTGATGTGTGTGTGTTTTCTTGTCTAAACAAAGGAGTGATAACTGGTGTGTGTGTCAATCATTCCTGAGATCAAAGGGTCAGCACGGACAAAGTACTGAGAT	GCAAACACCTTGTGTTTGTGAGTGTGATGTGTGTGTGTTTTCTTGTCTAAACAAAGGAGTGATAACTGGTGTGTGTGTCAATCATTCCTGAGATCAAAGG	cat5	KMAC-designed opening DE	Y	GCAAACACC:-7.0,CACCTTGTG:-6.0,TGTGTTTGTG:-5.3,TGTGAGTGTG:-5.6,TGTGATGTG:-7.0,TGTGTGTGTGTT:-10.9,TGTTTTCTT:-8.7,TCTTGTCT:-13.9,AAACAAAGG:-6.4,AAGGAGTGA:-5.1,GTGATAAC:-5.9,TAACTGGT:-6.4,TGGTGTGTGTGT:-5.6,GTGTCAA:-9.6,TCAATCAT:-5.1,TCATTCCT:-5.2,TCCTGAGA:-6.6,GAGATCAAAG:-7.0,AAAGGAAT:-17.6	2291	1611	2614	2556	3446	3670	1624	1501	718	742	1760	1412	241	261
ATCGAAAGGATGGGAGTACTAAGCTGATAGCGCATTACTTTGTTTGTCACAGCTTTGTCTCAGCAGATAAATGTAAATCAAAGTCAACAGCTCTAAAAACAAACAAAAGAATTTACATTAGGGCAGTCAGCACGGACAAAGTACTGAGAT	GATAGCGCATTACTTTGTTTGTCACAGCTTTGTCTCAGCAGATAAATGTAAATCAAAGTCAACAGCTCTAAAAACAAACAAAAGAATTTACATTAGGGCA	cat5	KMAC-designed opening DE	Y	GATAGCGCA:-9.3,CGCATTACT:-10.8,TACTT:-14.9,ACTTTGTT:-8.5,TGTTTGTCA:-5.5,GTCACAG:-6.6,ACAGCTTT:-5.2,CTTTGTC:-5.9,TGTCTCA:-7.8,CTCAGCAG:-6.9,GCAGATAA:-6.0,ATAAATGT:-10.8,ATGTAAAT:-6.5,AAATCAAAG:-5.2,AAAGTCAAC:-5.8,CAACAGCT:-6.3,AGCTCTAAA:-13.2,TAAAAACAA:-5.9,ACAAACAAA:-10.3,CAAAAGAA:-12.0,AGAATTTA:-11.5,TTTACATTAGGG:-14.3,AGGGCATCAG:-5.9	49	1	39	25	474	636	878	910	69	2	2	219	1165	1062
ATCGAAAGGATGGGAGTACTAAGCTGCTTTCATCAGGGGGTTGTTAACTCTCCAGAAGAGATAACCTTAAAGTAACTGGTGTGTGTGTAAAGAAAAAAACAGACAAGGCAAGAGTTCCAGCTGTGGTCAGCACGGACAAAGTACTGAGAT	GCTTTCATCAGGGGGTTGTTAACTCTCCAGAAGAGATAACCTTAAAGTAACTGGTGTGTGTGTAAAGAAAAAAACAGACAAGGCAAGAGTTCCAGCTGTG	cat5	KMAC-designed opening DE	Y	GCTTTCATC:-5.3,CATCAGGGGG:-19.8,GGGGTTGTTAACTC:-21.3,ACTCTCCAG:-6.3,CCAGAAGAG:-5.8,AGAGATAAC:-6.7,TAACCTTAAAG:-18.1,AAAGTAAC:-5.9,TAACTGGT:-6.4,TGGTGTGTGTGT:-5.6,GTGTAA:-13.8,GTAAAG:-8.7,AAAGAAAAAA:-7.5,AAAAACA:-16.4,AACAGACAA:-5.2,ACAAGGCA:-6.9,GGCAAGAGTT:-5.5,AGTTCCAG:-5.3,CCAGCTGTG:-5.7	816	620	878	468	1386	1168	402	731	859	1413	2615	1475	629	740
ATCGAAAGGATGGGAGTACTAAGCTATGATAAGAATTTACTTTTCTTTGATCTTTGCAAAGCATCAGGGGGTTGTTTGAAGTCATTCCTTTGAAATTCCCTTTGCTTTTAATCTCTATTAACTGTGTCAGCACGGACAAAGTACTGAGAT	ATGATAAGAATTTACTTTTCTTTGATCTTTGCAAAGCATCAGGGGGTTGTTTGAAGTCATTCCTTTGAAATTCCCTTTGCTTTTAATCTCTATTAACTGT	cat5	KMAC-designed opening DE	Y	ATGATAAG:-5.1,TAAGAATTTA:-13.1,TTTACTTTT:-6.4,TTTTCTTT:-7.1,CTTTGATCTT:-8.5,TCTTTGCA:-5.6,TGCAAAG:-10.1,AAAGCATCAGG:-21.0,CAGGGGGTTGTT:-21.6,TGTTTGAAG:-5.2,GAAGTCAT:-5.2,TCATTCCT:-5.2,TCCTTTGA:-7.2,TTGAA:-33.4,TGAAATTC:-10.3,ATTCCCTT:-8.9,CCTTTGCTT:-6.1,GCTTTTAA:-10.5,TTAATCT:-13.0,ATCTCTA:-7.2,TCTATTA:-7.3,ATTAACT:-15.1,AACTGTGT:-5.4	252	110	77	230	1007	850	426	1194	345	395	226	193	211	256
ATCGAAAGGATGGGAGTACTAAGCTAATCCTTATCTTTAAATTCTTGCCTGGCATTCCAGATAAACAGAAAGGAATTTACACTTTAAGGTTATCAGGGGGGTTGTTAACTCTGTGACAAACAAAGGTCAGCACGGACAAAGTACTGAGAT	AATCCTTATCTTTAAATTCTTGCCTGGCATTCCAGATAAACAGAAAGGAATTTACACTTTAAGGTTATCAGGGGGGTTGTTAACTCTGTGACAAACAAAG	cat5	KMAC-designed opening DE	Y	AATCCTT:-8.8,CCTTA:-11.5,CTTATCTT:-22.7,TCTTTAAA:-6.9,TAAATT:-21.7,AATTCTTG:-23.6,CTTGCCTGGCATT:-18.4,CATTCCAG:-8.8,CCAGATAA:-14.2,ATAAACAGA:-5.1,CAGAAAGG:-5.1,AAGGAATTTAC:-5.8,TTACACTT:-5.1,ACTTTAAGGTT:-18.4,GGTTA:-17.6,GTTATCAG:-7.3,TCAGGGGG:-8.8,GGGGGTTGT:-20.5,TTGTTAACTC:-23.1,ACTCTGT:-9.7,CTGTGAC:-6.6,TGACAAACA:-5.5,AACAAAG:-23.2	225	295	38	128	137	216	70	57	356	367	218	465	65	174
ATCGAAAGGATGGGAGTACTAAGCTGAGATAGCATTTAACTGTGTCAAAGGCTGATCCTAGGCAGGAATGTCTCTCTCTTTGAAAGCAGATAAGGGGCCCTGTGAATAAGGGGATTAACACTACAGTCAGCACGGACAAAGTACTGAGAT	GAGATAGCATTTAACTGTGTCAAAGGCTGATCCTAGGCAGGAATGTCTCTCTCTTTGAAAGCAGATAAGGGGCCCTGTGAATAAGGGGATTAACACTACA	cat5	KMAC-designed opening DE	Y	GAGATAG:-9.8,ATAGCAT:-7.5,GCATTTA:-6.2,TTTAACT:-11.3,AACTGTGT:-5.4,GTGTCAA:-9.6,TCAAAGGCT:-5.4,GGCTGATCCT:-21.5,TCCTAGGCAGG:-21.3,CAGGAATGT:-7.7,ATGTCTCT:-6.2,CTCTCTCTTT:-5.3,CTTTGAA:-21.0,TGAAAGCAG:-5.1,GCAGATAA:-6.0,ATAAGGGG:-5.9,GGGGCCCTGT:-5.3,CTGTGAA:-8.6,TGAATA:-13.2,AATAA:-19.6,ATAAGGGG:-5.9,GGGGATTA:-8.7,ATTAACACTA:-5.5,ACTACAAAG:-7.0	633	675	201	326	1231	1401	1183	1708	1114	976	585	985	821	794
ATCGAAAGGATGGGAGTACTAAGCTAAGTCATACACACACATACACACACATACACACACACACACACACTTTAAGGTTTGCTTTTCTCCTTTGATGTTTACATTCTTTACTGTTGTTAACTCTCGTCAGCACGGACAAAGTACTGAGAT	AAGTCATACACACACATACACACACATACACACACACACACACACTTTAAGGTTTGCTTTTCTCCTTTGATGTTTACATTCTTTACTGTTGTTAACTCTC	cat5	KMAC-designed opening DE	Y	AAGTCATA:-5.2,CATACACACAC:-5.6,ACACATACACAC:-5.9,ACACACATACAC:-5.8,ACACACACACA:-45.7,CACACACACAC:-47.0,ACACTTTAAGGTT:-18.1,GGTTTGCTT:-5.2,GCTTTT:-6.6,TTTTCTC:-8.9,TCTCCT:-8.0,TCCTTTG:-11.4,TTTGATGT:-11.1,ATGTTTACAT:-17.5,ACATTCTT:-14.5,TCTTTACT:-8.3,TACTGTTG:-7.3,GTTGTTAACTC:-21.9,ACTCTCCAG:-6.3	2473	2028	1587	3227	2134	2657	720	1440	1617	2025	4125	3642	918	989
ATCGAAAGGATGGGAGTACTAAGCTCTGGCTTCTTGCCTGGCAGCTGTGTCAAAGCCTTTGACTTATCATTTACACACAGTCAACAAAAGAAACAAGGCAAACAGATCAAAGCATCAGGGGATTAGTCAGCACGGACAAAGTACTGAGAT	CTGGCTTCTTGCCTGGCAGCTGTGTCAAAGCCTTTGACTTATCATTTACACACAGTCAACAAAAGAAACAAGGCAAACAGATCAAAGCATCAGGGGATTA	cat5	KMAC-designed opening DE	Y	CTGGCTTCT:-6.7,TTCTTGCCTGGCA:-19.0,GGCAGCTGT:-5.4,CTGTGTCAA:-5.5,TCAAAGCC:-7.3,AGCCTTTGA:-5.4,TTGACTTA:-9.9,CTTATCAT:-5.1,TCATTTAC:-5.4,TTACAC:-13.8,ACACACAGT:-6.4,CAGTCAACA:-5.5,AACAAAAG:-5.6,AAAGAAACA:-5.4,AACAAGGCA:-5.6,GGCAAACAG:-5.6,ACAGATCAA:-5.8,TCAAAGC:-16.1,AAGCATCAGGGG:-19.9,GGGGATTA:-8.7	702	733	126	261	1515	1954	822	990	195	86	83	0	595	624
ATCGAAAGGATGGGAGTACTAAGCTAAGAATTTCACAGCTGTGTGAAATTCCTGTTATCTCTTGACAGCTGCCACCTGCTGATCCTGTGATTAGGGATAACAAGCCAGCAGCTGTGTAAATGTTAGTCAGCACGGACAAAGTACTGAGAT	AAGAATTTCACAGCTGTGTGAAATTCCTGTTATCTCTTGACAGCTGCCACCTGCTGATCCTGTGATTAGGGATAACAAGCCAGCAGCTGTGTAAATGTTA	cat5	KMAC-designed opening DE	Y	AAGAATTTCAC:-22.2,TCACAGCTG:-6.7,GCTGTGT:-8.8,GTGTGAAATTC:-24.0,ATTCCTGT:-6.1,CTGTTATCT:-8.7,ATCTCTT:-7.1,TCTTGACAG:-21.3,ACAGCTGC:-9.2,CTGCCACCT:-6.4,ACCTGCTG:-5.3,GCTGATCCT:-21.8,TCCTGTGA:-6.9,GTGATTA:-5.6,ATTAGGGATAA:-14.9,ATAAC:-18.1,TAACAAGCC:-13.8,AGCCAGCAG:-6.5,GCAGCTGT:-9.2,CTGTGTAAA:-6.1,TAAATGTT:-24.6,TGTTATCCCTAATGT:-13.7	636	375	98	321	676	984	429	732	269	328	451	430	608	706
ATCGAAAGGATGGGAGTACTAAGCTTGCCTGGCATTACTTTAAGGTTAAAAGCATTGTAAACATTTAATCTGATGCCCTCTTCTGTGCTAATCTCTGTGTGTGTGTGAAATTCTTTTGTTCTCCTGTCAGCACGGACAAAGTACTGAGAT	TGCCTGGCATTACTTTAAGGTTAAAAGCATTGTAAACATTTAATCTGATGCCCTCTTCTGTGCTAATCTCTGTGTGTGTGTGAAATTCTTTTGTTCTCCT	cat5	KMAC-designed opening DE	Y	TGCCTGGCAT:-19.6,GCATTACT:-12.2,TACTT:-14.9,ACTTTAAGGTT:-18.4,GGTTAAAAGCAT:-18.7,GCATTGT:-6.3,TTGTAAACAT:-5.5,ACATTTAA:-15.3,TTAATCT:-13.0,ATCTGATGCCC:-5.8,GCCCTCTTCTG:-5.1,TCTGTGCT:-6.3,TGCTAATCTC:-7.9,TCTCTGTGTGT:-6.1,GTGTGTGTGA:-5.7,GTGAA:-17.1,TGAAATTCT:-21.6,TTCTTTTG:-12.0,TTTGTTCTC:-5.4,TCTCCT:-8.0	1724	1381	460	893	3687	3988	1283	2184	1638	1451	2324	877	2000	1870
ATCGAAAGGATGGGAGTACTAAGCTTTTCATCCTGTGTTAGCTGATAATCTCTAAATATTTACATTAGGGATAACATTCTTGCCTGGCATTAGGCTGATCCTTTGACAGAGTTAACAACAGCTAAGTCAGCACGGACAAAGTACTGAGAT	TTTCATCCTGTGTTAGCTGATAATCTCTAAATATTTACATTAGGGATAACATTCTTGCCTGGCATTAGGCTGATCCTTTGACAGAGTTAACAACAGCTAA	cat5	KMAC-designed opening DE	Y	TTTCATCC:-5.1,ATCCTGT:-13.2,CTGTGTTA:-6.4,GTTAGCT:-5.6,AGCTGATA:-7.2,GATAAT:-17.2,TAATCT:-31.0,ATCTCTA:-7.2,TCTAAAT:-14.1,AAATATTTA:-9.9,TTTACATTAGGG:-14.3,AGGGATAAC:-15.8,TAACATTC:-6.4,ATTCTTGC:-22.0,TTGCCTGGCA:-23.7,GGCATTAGGCT:-17.8,GGCTGATCCT:-21.5,TCCTTTGA:-7.2,TTGACAGAG:-5.5,AGAGTTAACAAC:-21.3,CAACAGCT:-6.3,AGCTAAC:-5.6	634	427	216	487	1069	1601	556	973	190	279	178	564	177	164
ATCGAAAGGATGGGAGTACTAAGCTACACCTGTCCCCTAATGTAAAAGATTAACTCTTGACACAATGGTGTGTGTGTTAATTAAATCCTTTATCTTTTATCTCTTTGACATTCCAACACACACACGTCAGCACGGACAAAGTACTGAGAT	ACACCTGTCCCCTAATGTAAAAGATTAACTCTTGACACAATGGTGTGTGTGTTAATTAAATCCTTTATCTTTTATCTCTTTGACATTCCAACACACACAC	cat5	KMAC-designed opening DE	Y	ACACCTGT:-7.2,CTGTCCCCT:-6.7,CCCTAATGTAAA:-14.3,TAAAAGAT:-5.8,AGATTAA:-13.0,TTAACTCTTGAC:-22.2,TGACACAA:-9.0,ACAATGGT:-7.0,TGGTGTGTGTGT:-5.6,GTGTTAAT:-10.2,TAATTAAAT:-13.7,AAATCCTTT:-5.8,CTTTATCT:-10.6,ATCTTTTA:-5.8,TTTATCTC:-11.4,TCTCTTTGA:-7.9,TTGACATT:-7.1,CATTCCAA:-9.1,CCAACACACA:-5.5,CACACACACACAC:-44.1	2098	834	652	816	2077	2008	1084	1626	1574	1664	1468	1267	1769	1905
ATCGAAAGGATGGGAGTACTAAGCTTTGATCTCTGTCAAACATTTCAAAAGGAATGTTTGTTTTTCTTTTAACCTTAAAGTGTGAAATTCTTATCTGTGTGTGTATTTACATTAAACAAACAAAGGTCAGCACGGACAAAGTACTGAGAT	TTGATCTCTGTCAAACATTTCAAAAGGAATGTTTGTTTTTCTTTTAACCTTAAAGTGTGAAATTCTTATCTGTGTGTGTATTTACATTAAACAAACAAAG	cat5	KMAC-designed opening DE	Y	TTGATCTCT:-5.1,CTCTGTCAA:-5.5,TCAAACAT:-5.7,ACATTTCA:-7.5,TTCAAAAGG:-6.0,AAGGAA:-18.7,GGAATGTT:-12.0,TGTTTGTTTT:-11.8,TTTTTCTTTT:-8.1,TTTTAACCTTA:-19.0,CTTAAAGTGTGA:-18.7,GTGAAATTC:-21.6,ATTCTTA:-13.8,CTTATCTG:-10.7,TCTGTGT:-19.5,GTGTGTGTAT:-8.2,GTATTTA:-8.7,TTTACATTA:-19.0,ATTAA:-36.3,TTAAAC:-16.4,AAACAAACAAA:-6.6,CAAAGGC:-14.9	487	184	112	558	701	790	475	249	440	500	344	913	579	479
ATCGAAAGGATGGGAGTACTAAGCTATTCCCTTTTAACCTTAAAAGCATCAGGGCTTGTTAACACTTTAGTGTTACTTTGATCAAAGGCAGGCAAGAATTTAGAGCTCTGTGATAGCATTGTTGAGTCAGCACGGACAAAGTACTGAGAT	ATTCCCTTTTAACCTTAAAAGCATCAGGGCTTGTTAACACTTTAGTGTTACTTTGATCAAAGGCAGGCAAGAATTTAGAGCTCTGTGATAGCATTGTTGA	cat5	KMAC-designed opening DE	Y	ATTCCCTTT:-7.5,CTTTTAACCTTAAA:-18.1,TAAAAGCATCAGGG:-20.2,AGGGCTTGTTA:-16.3,GTTAACAC:-5.2,ACACTTTAGTGTTA:-5.5,GTTACTTT:-5.9,CTTTGATC:-28.8,GATCAAAGGC:-5.6,AGGCAGGCA:-5.3,GGCAAGAATT:-22.5,AATTTAG:-9.3,TTAGAGCT:-15.5,AGCTCTGTGATAG:-10.5,ATAGCAT:-7.5,GCATTGTT:-7.7,TGTTGACTT:-8.2	464	477	433	507	2201	2780	4293	5115	366	512	189	182	456	526
ATCGAAAGGATGGGAGTACTAAGCTTGTTTGTGCTAATCCTTATCTCCTTATCTATTAACACTGTCAGATAAATGTAAACAATCAGCAGGAATGTTTACATTCCTTTGAAAGAAGAGGGCATTCCGTCAGCACGGACAAAGTACTGAGAT	TGTTTGTGCTAATCCTTATCTCCTTATCTATTAACACTGTCAGATAAATGTAAACAATCAGCAGGAATGTTTACATTCCTTTGAAAGAAGAGGGCATTCC	cat5	KMAC-designed opening DE	Y	TGTTTGTGC:-5.3,GTGCTAATC:-6.1,AATCCTT:-8.8,CCTTATCTC:-8.7,TCTCCT:-8.0,TCCTTATC:-5.1,TATCTA:-10.9,TCTATTA:-7.3,ATTAACACT:-7.3,CACTGTCAG:-5.8,TCAGATAA:-8.5,ATAAA:-33.7,TAAATGTA:-5.1,TGTAAACAA:-5.4,ACAATCA:-6.7,ATCAGCAGG:-6.4,CAGGAATGT:-7.7,ATGTTTACA:-25.9,TACATTCC:-9.8,TTCCTTTGAA:-5.1,TGAAAGAAG:-5.8,GAAGAGGGCAT:-5.6,GCATTCCTG:-6.1	737	356	377	326	2627	2370	5221	6900	1184	1336	1642	978	1636	1838
ATCGAAAGGATGGGAGTACTAAGCTGTGACTCAGCTGTGTCAAGAGTTAATCTCTCTGTCAAGAGTTAATCCCCTGCTGATAAACACAAATATTTCAAAGGCAAACAGAAGAGTTAACACTAAAGGTCAGCACGGACAAAGTACTGAGAT	GTGACTCAGCTGTGTCAAGAGTTAATCTCTCTGTCAAGAGTTAATCCCCTGCTGATAAACACAAATATTTCAAAGGCAAACAGAAGAGTTAACACTAAAG	cat5	KMAC-designed opening DE	Y	GTGACTCA:-8.3,CTCAGCTG:-5.7,GCTGTGTCA:-5.5,GTCAAGAGTTAA:-22.2,TTAATCT:-13.0,ATCTCTCTG:-5.3,TCTGTCAA:-6.2,TCAAGAGTT:-21.9,AGTTAAT:-15.1,TAATCCCC:-8.7,CCCCTGCTG:-7.7,GCTGATAA:-11.8,ATAAA:-33.7,TAAACACAA:-5.2,ACAAATATT:-6.4,TATTTCAA:-5.9,TCAAAGGCA:-7.8,GGCAAACAG:-5.6,ACAGAAGA:-5.3,AAGAGTTAAC:-23.4,TAACACTAAAGTGT:-5.5	691	254	206	375	426	539	276	232	635	588	697	1210	507	847
ATCGAAAGGATGGGAGTACTAAGCTTGCCTGCCTGGCATTAGAGCTCTGTGTCACAGTGCTTCAAAGAGCTCTGTGAATTCAAACATTTAAATGTTTACAGCAGATAAGTGTGTGAGTTCCAGCTGTCAGCACGGACAAAGTACTGAGAT	TGCCTGCCTGGCATTAGAGCTCTGTGTCACAGTGCTTCAAAGAGCTCTGTGAATTCAAACATTTAAATGTTTACAGCAGATAAGTGTGTGAGTTCCAGCT	cat5	KMAC-designed opening DE	Y	TGCCTGCCT:-5.3,GCCTGGCATTAG:-19.0,TTAGAGCTC:-14.6,GCTCTGTGT:-5.9,GTGTCACA:-6.4,CACAGTGCT:-5.1,TGCTTCAAA:-5.5,CAAAGAGC:-5.3,GAGCTCTGTGA:-14.0,GTGAAT:-5.4,GAATTCA:-5.6,TTCAAACAT:-5.2,ACATTTAA:-15.3,TTAAATGTTTAC:-13.4,TTACAGCAGA:-7.0,CAGATAAG:-10.7,TAAGTGT:-5.5,GTGTGTGA:-7.2,GTGAGTTCCA:-6.1,TCCAGCTG:-8.7	2185	1553	1387	1376	2593	2641	1413	1420	2677	2174	2428	3517	1775	1482
ATCGAAAGGATGGGAGTACTAAGCTATCAAAGCAAACATTACAGTGTGAATGTTTCTCTGATGCCCTCTGTCAAAGGATCAGCCTAAAGTGTGAATGTCAAAGAACAAAGGAATGTAAATTCCAGGTCAGCACGGACAAAGTACTGAGAT	ATCAAAGCAAACATTACAGTGTGAATGTTTCTCTGATGCCCTCTGTCAAAGGATCAGCCTAAAGTGTGAATGTCAAAGAACAAAGGAATGTAAATTCCAG	cat5	KMAC-designed opening DE	Y	ATCAAAGCA:-5.3,AGCAAACATT:-5.5,CATTAC:-16.9,TTACAGTG:-5.1,AGTGTGAAT:-6.7,GAATGTTT:-7.9,GTTTCTCTG:-5.7,TCTGATGCCCTCT:-5.8,CTCTGTCAA:-5.5,TCAAAGGA:-7.2,AGGATCAGCCTAA:-19.6,CTAAAGTGTGAA:-6.4,TGAAT:-24.9,GAATGTC:-9.8,TGTCAAAG:-7.3,AAAGAACAAA:-5.9,CAAAGGA:-11.4,AGGAATG:-25.2,AATGTAAA:-27.3,TAAATTCC:-6.7,TTCCA:-11.7,TCCAGGAAT:-6.1	799	694	431	821	1068	1093	787	967	936	844	601	623	817	1040
ATCGAAAGGATGGGAGTACTAAGCTTTCATCTTTGCAAACATAGCAGATGGAATGTAAATAAATCACAAATATTTACAAAGTAATGCGCATTACCTTTGTTTCTCTGTGTGTCAAGAGTGTTTTGGTCAGCACGGACAAAGTACTGAGAT	TTCATCTTTGCAAACATAGCAGATGGAATGTAAATAAATCACAAATATTTACAAAGTAATGCGCATTACCTTTGTTTCTCTGTGTGTCAAGAGTGTTTTG	cat5	KMAC-designed opening DE	Y	TTCATCTT:-5.7,TCTTTGCA:-5.6,TGCAAACAT:-5.5,ACATAGCA:-5.1,AGCAGATGG:-6.9,ATGGAATGT:-7.3,ATGTAAATA:-5.2,AATAAAT:-9.1,AAATCACAAA:-5.8,CAAATATTT:-11.4,ATTTACAA:-8.1,ACAAAGT:-10.3,AAGTA:-14.9,AGTAATGCGC:-9.9,GCGCATTAC:-9.9,TTACCTT:-5.9,CCTTTGTTT:-6.4,GTTTCTCTGT:-5.6,CTGTGTGTC:-5.3,TGTCAAGAG:-21.3,AGAGTGTTT:-5.5,GTTTTGTGT:-5.8	1537	644	1470	991	981	947	715	778	1096	998	3266	2032	883	1030
ATCGAAAGGATGGGAGTACTAAGCTCTTTTATCTCTATCTGACCTCTGTGATAACAAAGGGATAACACTAAAGTATTTCACAGCTGATCCTAGGCAAACAGCTGGTGTGTTTGAACAAACACTAAGTCAGCACGGACAAAGTACTGAGAT	CTTTTATCTCTATCTGACCTCTGTGATAACAAAGGGATAACACTAAAGTATTTCACAGCTGATCCTAGGCAAACAGCTGGTGTGTTTGAACAAACACTAA	cat5	KMAC-designed opening DE	Y	CTTTTATCT:-6.1,ATCT:-87.1,ATCTCTA:-7.2,TCTATCTG:-6.5,TCTGACCTCT:-5.1,CTCTGTGATA:-12.3,GATAACA:-23.5,AACAAAGG:-10.9,AAGGGA:-7.2,GGGATAAC:-14.0,TAACACTAAAGT:-5.8,AAGTATTT:-7.7,ATTTCAC:-12.6,TCACAGCTG:-6.7,GCTGATCCT:-21.8,TCCTAGGCA:-12.3,GGCAAACAG:-5.6,ACAGCTGG:-10.6,CTGGTGTGT:-5.1,GTGTTTGAA:-5.5,TGAAC:-10.4,GAACAAACA:-7.9,AACACTAAA:-9.0	234	163	88	307	733	683	309	547	324	317	49	398	558	795
ATCGAAAGGATGGGAGTACTAAGCTAGAGCTCTGTGATAACCTTAAAGTTAATGTAAAAGCATCAGGGCATCAGAGCTGTGTGATAGCTGACACACTTAAGGTTAAAAACATTTGTTTGTTTCTCGTCAGCACGGACAAAGTACTGAGAT	AGAGCTCTGTGATAACCTTAAAGTTAATGTAAAAGCATCAGGGCATCAGAGCTGTGTGATAGCTGACACACTTAAGGTTAAAAACATTTGTTTGTTTCTC	cat5	KMAC-designed opening DE	Y	AGAGCTCTGTGATA:-13.1,GATAACC:-5.4,AACCTTAAAGT:-18.4,AAGTTAAT:-7.3,TAATGTAAA:-19.0,TAAAAGCATCAGGG:-20.2,AGGGCATCAG:-5.9,TCAGAGCTG:-5.6,GCTGTGTG:-6.6,TGTGATAG:-13.0,ATAGCTGAC:-8.7,TGACACAC:-6.5,ACACTTA:-5.5,CTTAA:-32.9,TTAAGGTTAAAA:-18.1,AAAAACA:-16.4,AACATTTG:-6.4,TTTGTTTGTTT:-6.6,GTTTCTCTG:-5.7	951	546	597	741	1803	2256	1700	1531	797	1171	515	798	934	1119
ATCGAAAGGATGGGAGTACTAAGCTGTGTTTACCATTCCCTTTGCTTTGCTCTTTGATGCTTTTAACCTTAAAGTGTTAACACCTGTCAAAAGGAATGAGTCAAGAGTTAACTCTTGACTTAGGCGTCAGCACGGACAAAGTACTGAGAT	GTGTTTACCATTCCCTTTGCTTTGCTCTTTGATGCTTTTAACCTTAAAGTGTTAACACCTGTCAAAAGGAATGAGTCAAGAGTTAACTCTTGACTTAGGC	cat5	KMAC-designed opening DE	Y	GTGTTTACC:-5.8,TACCATTC:-5.1,ATTCCCTTTG:-6.7,TTTGCTTTG:-6.7,TTTGCTCT:-11.4,CTCTTTGAT:-6.6,TGAT:-84.5,TGATGCTTTTAACC:-18.4,AACCTTAAAGTG:-18.1,AGTGTTAA:-9.9,TTAACAC:-17.5,ACACCTGT:-7.2,CTGTCAA:-20.2,TCAAAAGGA:-7.2,AGGAATGA:-5.2,ATGAGTCA:-13.4,GTCAAGAGTTAA:-22.2,TTAACTCTTGA:-24.6,TTGACTTAG:-5.5,TTAGGCTGA:-19.1	740	584	546	641	1110	1106	893	732	1703	1266	1660	1522	703	596
ATCGAAAGGATGGGAGTACTAAGCTCTTTGATGTGAAATTCTTTGATGTTTGTTTGTTTACTTCACACACACAGAGCTCAGCCTGTCTCTGTGTGTAAACAGTGAGATAAGCATTGTTTGAATTTGTCAGCACGGACAAAGTACTGAGAT	CTTTGATGTGAAATTCTTTGATGTTTGTTTGTTTACTTCACACACACAGAGCTCAGCCTGTCTCTGTGTGTAAACAGTGAGATAAGCATTGTTTGAATTT	cat5	KMAC-designed opening DE	Y	CTTTGATGTG:-7.3,TGTGAAATTC:-24.3,ATTCTTT:-5.4,CTTTGATGT:-9.5,ATGTTTGTT:-7.6,TGTTTGTTTA:-6.7,TTTAC:-97.2,TTACTTCA:-6.1,TTCACA:-34.5,CACACACACA:-49.1,CACAGAGCTC:-14.3,GCTCAGCCTG:-5.8,CCTGTCTC:-6.5,TCTCTGTGTGT:-6.1,GTGTAAACA:-11.2,AACAGTGAG:-5.6,TGAGATAAG:-7.9,TAAGC:-24.2,AAGCAT:-20.3,GCATTGT:-6.3,TTGTTTGAA:-5.2,TGAATTTCAG:-5.2	1147	619	1111	686	2200	2629	652	969	1498	1193	4041	1578	1145	1065
ATCGAAAGGATGGGAGTACTAAGCTCTTAATCTTGTTTTGTCAAGAGTTAACTAAAGTAATGTGACTTTAAGGTTAAAAGCATCAGGGGATTAACACTTTGTAAACATTACAGCTAACACTAAAGGTCAGCACGGACAAAGTACTGAGAT	CTTAATCTTGTTTTGTCAAGAGTTAACTAAAGTAATGTGACTTTAAGGTTAAAAGCATCAGGGGATTAACACTTTGTAAACATTACAGCTAACACTAAAG	cat5	KMAC-designed opening DE	Y	CTTAATCT:-5.1,ATCTTGT:-7.9,TTGTTTT:-21.0,TTTTGTCA:-7.2,GTCAAGAGTTAAC:-21.3,TAACTA:-12.9,ACTAA:-20.2,CTAAAGTA:-7.6,AGTAATGTG:-7.6,TGTGACTTT:-5.5,CTTTAAGGTTAAAA:-18.1,AAAAGCATCAGGGG:-19.6,GGGGATTA:-8.7,ATTAACACT:-7.3,CACTTTGTA:-5.8,TGTAAACATT:-25.1,CATTAC:-16.9,TTACAGCT:-5.6,AGCTAAC:-5.6,TAACACTAAAGTG:-5.5	432	321	203	200	883	695	338	362	450	460	1127	754	258	301
ATCGAAAGGATGGGAGTACTAAGCTTTGTGTGTGTGTGACAGTTGTTAACTCTGTCAAGAGGGCATCAGCCTAATGCCCTCTTCCTGACCTCATCTCTCTGAAAGCAAAGCAAAGGCATCAGATGGTCAGCACGGACAAAGTACTGAGAT	TTGTGTGTGTGTGACAGTTGTTAACTCTGTCAAGAGGGCATCAGCCTAATGCCCTCTTCCTGACCTCATCTCTCTGAAAGCAAAGCAAAGGCATCAGATG	cat5	KMAC-designed opening DE	Y	TTGTGTGTGTGTG:-5.4,TGTGACAG:-6.0,ACAGTTG:-7.9,GTTGTTAACTC:-21.9,ACTCTGT:-9.7,CTGTCAAGA:-21.3,AAGAGGGCATCA:-6.7,ATCAGCCTA:-21.6,CCTAATGCC:-19.6,TGCCCTCTTC:-5.5,CTTCCTGAC:-5.8,TGACCTCA:-8.7,CTCATCT:-5.6,ATCTCTCTG:-5.3,TCTGAA:-9.2,TGAAAGCA:-7.9,AGCAAAGC:-6.2,AAGCAAAGG:-6.1,AAGGCA:-20.1,GGCATCAGAT:-5.8,AGATGGCAGT:-5.2	1499	1200	927	1185	3337	4004	1283	3174	1540	1193	1877	2070	1821	1720
ATCGAAAGGATGGGAGTACTAAGCTCCTCTGTGGAATGCCAGGCAAGAGTTTGCTCTTGACACACACTTAATCTCTTTGACTTTTAACCTTAAAGTAAACAGCAGAATTTAGAGCTGTGACACACGTCAGCACGGACAAAGTACTGAGAT	CCTCTGTGGAATGCCAGGCAAGAGTTTGCTCTTGACACACACTTAATCTCTTTGACTTTTAACCTTAAAGTAAACAGCAGAATTTAGAGCTGTGACACAC	cat5	KMAC-designed opening DE	Y	CCTCTGTGG:-5.5,GTGGAATG:-5.1,AATGCCAGGCAAG:-18.4,CAAGAGTTT:-7.3,GTTTGCTCT:-9.6,CTCTTGACA:-21.3,GACACACAC:-6.3,ACACTTA:-5.5,CTTAATCT:-5.1,ATCTCTT:-7.1,TCTTTGA:-6.0,TTGACTTTT:-6.1,TTTTAACCTTAAAGT:-18.1,AAGTAAACAG:-5.5,ACAGCAGAA:-7.7,AGAATTT:-23.0,ATTTAGAGCT:-13.7,AGCTGTGA:-7.5,GTGACACA:-6.0,CACACACACC:-8.3	1850	1162	646	712	2817	2886	969	882	1558	2047	1408	1394	1292	1566
ATCGAAAGGATGGGAGTACTAAGCTCTGACACAGCAGGAATGCCAGGCCTGTCAGCTATCTCTTATCTCTCTTTGTTCCTCTGTGAAACAGCAGGGATAACTGTGGAATGCTTATCTGACCTCTGGTCAGCACGGACAAAGTACTGAGAT	CTGACACAGCAGGAATGCCAGGCCTGTCAGCTATCTCTTATCTCTCTTTGTTCCTCTGTGAAACAGCAGGGATAACTGTGGAATGCTTATCTGACCTCTG	cat5	KMAC-designed opening DE	Y	CTGACACA:-10.1,CACAGCAGG:-5.9,CAGGAATG:-11.9,AATGCCAGGC:-19.9,AGGCCTGTCA:-23.4,GTCAGCTAT:-8.7,CTATCTCTT:-5.2,TCTTATCTC:-6.2,TCTCTCTTT:-7.9,CTTTGTTCCT:-5.2,TCCTCTG:-6.1,TCTGTGA:-16.8,GTGAA:-17.1,TGAAACAG:-5.9,ACAGCAGGG:-5.2,AGGGATAAC:-15.8,TAACTGTGG:-5.8,GTGGAATG:-5.1,AATGCTT:-6.5,GCTTATCTG:-5.5,TCTGACCTC:-5.1,CCTCTGTGG:-5.5	3238	2550	1773	1948	3476	3540	5118	4912	4355	3587	3570	6231	4637	4786
ATCGAAAGGATGGGAGTACTAAGCTGAGCTCTAAATTCTTTGCAAACAGAGACATTCCTAGGCAGGGCTTATCTCTATTATCAGATAAATGTTTGCTTAATCTTTGCAAAGAGTTAACAACAGCCGTCAGCACGGACAAAGTACTGAGAT	GAGCTCTAAATTCTTTGCAAACAGAGACATTCCTAGGCAGGGCTTATCTCTATTATCAGATAAATGTTTGCTTAATCTTTGCAAAGAGTTAACAACAGCC	cat5	KMAC-designed opening DE	Y	GAGCTCTAA:-14.6,CTAAATTCTT:-13.4,TCTTTGCA:-5.6,TGCAAA:-20.2,CAAACAGAG:-10.5,AGAGACA:-8.2,GACATTCCT:-5.2,TCCTAGGC:-10.7,AGGCAGGGC:-8.9,GGGCTTATCT:-5.5,ATCTCTA:-7.2,TCTATTA:-7.3,ATTATCAG:-5.3,TCAGATAA:-8.5,ATAAATGTT:-9.3,TGTTTGCTTA:-5.5,CTTAA:-32.9,TTAATCTT:-5.1,TCTTTGCA:-5.6,TGCAAAGA:-5.6,AAGAGTTAACAAC:-21.3,CAACAGCCA:-6.4	271	95	46	40	764	697	755	1306	922	874	93	634	1036	1488
ATCGAAAGGATGGGAGTACTAAGCTTAAAAAAACAAAAAAGAAAGAATCAAATTAATAATTATTCATTTATCACAAAAATCAATCAATAAATTAAAATTGATGGATAGGTAAATCTTTCTTTTAAGTCAGCACGGACAAAGTACTGAGAT	TAAAAAAACAAAAAAGAAAGAATCAAATTAATAATTATTCATTTATCACAAAAATCAATCAATAAATTAAAATTGATGGATAGGTAAATCTTTCTTTTAA	cat6		N	TAAAAAAA:-16.0,AAAACAAAAAA:-6.6,AAAAGAAAGAA:-9.0,AGAATCAA:-6.9,TCAAATTA:-7.2,ATTAATA:-5.4,AATAATTA:-6.0,ATTATTC:-7.5,ATTCATTT:-6.4,ATTTATCAC:-5.1,TCACAAAA:-5.4,AAAAATCAAT:-8.0,CAATCAATAA:-5.3,ATAAATTAA:-6.4,TTAAAAT:-14.2,AAATTGAT:-9.6,TGATGGAT:-5.9,GGATAGGT:-6.7,AGGTAAA:-6.2,TAAATCTTT:-7.0,CTTTCTTTT:-11.5,TTTTAATTAA:-6.4	1	0	0	0	0	0	0	0	0	0	0	0	0	0
ATCGAAAGGATGGGAGTACTAAGCTTTGATTGATTAAAAAAAAAAAAAACAGATTGATCTTTATCATTAAGTAATTTACTTAAGCAAATAAATAAAATAAATAAATAAAATCAATACATCAATCAGTCAGCACGGACAAAGTACTGAGAT	TTGATTGATTAAAAAAAAAAAAAACAGATTGATCTTTATCATTAAGTAATTTACTTAAGCAAATAAATAAAATAAATAAATAAAATCAATACATCAATCA	cat6		N	TTGATTGAT:-7.7,TGATTAA:-16.7,TTAAAAAAAAA:-5.6,AAAAAAAAACA:-5.8,AACAGATTG:-5.9,ATTGATC:-10.0,GATCTTTA:-8.0,TTTATCAT:-7.1,TCATTAA:-13.5,TTAAGTAA:-8.0,GTAATTTA:-6.4,TTTACTTAA:-5.6,TTAAGCA:-5.4,AGCAAATA:-5.1,AATAAATAA:-10.8,ATAAAATAA:-7.2,ATAAATAAAT:-8.1,AAATAAAA:-6.5,AAAATCA:-18.9,ATCAATA:-21.5,AATACATC:-5.6,CATCAATC:-6.8,AATCAAAT:-7.0	0	0	0	0	0	0	0	0	0	0	0	0	0	0
ATCGAAAGGATGGGAGTACTAAGCTAAGGAACTTCACATAAATCAAATGTGATTTAAAAAAAGAATTCATTGATTTATGTGAAGTTAAATCTTTTCATTTTTTTTTTACTTAGATATGATTTATTGTCAGCACGGACAAAGTACTGAGAT	AAGGAACTTCACATAAATCAAATGTGATTTAAAAAAAGAATTCATTGATTTATGTGAAGTTAAATCTTTTCATTTTTTTTTTACTTAGATATGATTTATT	cat6		N	AAGGAACTTCACATAA:-5.6,ATAAATC:-32.6,AATCAAAT:-7.0,AAATGTGA:-6.2,GTGATTTA:-8.8,TTTAAAAA:-7.6,AAAAAAGAAT:-5.1,GAATTCATT:-5.3,CATTGATT:-10.1,GATTTATG:-16.1,TATGTGAAGT:-5.2,AAGTTAAA:-5.6,TAAATCTT:-9.3,TCTTTTC:-6.4,TTTCATTTT:-5.9,TTTTTTTTTTA:-11.0,TTTACTT:-8.5,ACTTAGA:-6.0,TAGATAT:-6.4,ATATGA:-6.9,ATGATTTAT:-5.5,TTATTATA:-6.3	87	0	0	0	1	52	0	9	22	3	57	232	98	73
ATCGAAAGGATGGGAGTACTAAGCTAATATTGATTATTTCACATGAATGACCTATCCTTTCCCATTTTGGTTTTTTTGTTATTTGAATAGTTCTTTCTTTCTTTTTTACCTTCTTGATTTCATTAGTCAGCACGGACAAAGTACTGAGAT	AATATTGATTATTTCACATGAATGACCTATCCTTTCCCATTTTGGTTTTTTTGTTATTTGAATAGTTCTTTCTTTCTTTTTTACCTTCTTGATTTCATTA	cat6		N	AATATTGA:-5.3,TTGATTAT:-6.4,TTAT:-161.4,TTATTTC:-13.7,TTTCACAT:-5.4,ACATGA:-9.9,ATGAATG:-5.5,AATGACCT:-5.3,ACCTATCC:-6.7,ATCCTTTCCCA:-6.6,CCCATTTT:-6.7,TTTTGGTTTTT:-5.4,TTTTTTGT:-8.4,TTGTTA:-7.2,GTTATTTG:-6.5,TTTGAATAGTTCTT:-5.9,TCTTTCTTTCT:-11.8,TTCTTTTTTA:-6.9,TTTACCT:-6.2,ACCTTCTTGA:-5.7,TTGATTTC:-7.3,TTTCATT:-10.0,CATTAATCA:-7.6	1822	523	338	1165	1520	2458	784	1542	1145	1149	1872	2358	315	458
ATCGAAAGGATGGGAGTACTAAGCTCCACTTGGTTATTAATGGAACTTCACATTAATCATTACATCATTAATTAAATTATTTATTTTAATCAATATCCAACATTAGTCCCAAGTGATTAAACAAAGTCAGCACGGACAAAGTACTGAGAT	CCACTTGGTTATTAATGGAACTTCACATTAATCATTACATCATTAATTAAATTATTTATTTTAATCAATATCCAACATTAGTCCCAAGTGATTAAACAAA	cat6		N	CCACTTGGTT:-6.0,GGTTATT:-6.0,TATTAAT:-5.4,TAATGGAA:-5.4,GGAACTTCACA:-5.3,CACATTA:-6.6,ATTAATCAT:-6.4,TCATTAC:-8.7,TTACA:-21.8,TACATCAT:-6.3,TCATTAAT:-9.1,TAATTAAA:-20.2,TAAATTAT:-7.6,TTATTTATT:-10.8,TATTTTAA:-5.4,TTAATC:-24.3,AATCAATA:-21.9,AATATCCAACAT:-5.1,ACATTA:-13.4,ATTAGTCCC:-6.7,TCCCAAGTG:-5.7,AGTGATTA:-8.2,ATTAAACA:-6.5,AACAAAGAA:-6.7	0	0	0	0	0	0	0	0	0	0	0	0	0	0
ATCGAAAGGATGGGAGTACTAAGCTAAATCAATAACCCTGATTTTAATTGATTTGACCTCTGTGTAATTATGGATATTAGTCAAAAAAATCAAAGAATAGTTCTTTCTTTTCATTTTAAGTACATGTCAGCACGGACAAAGTACTGAGAT	AAATCAATAACCCTGATTTTAATTGATTTGACCTCTGTGTAATTATGGATATTAGTCAAAAAAATCAAAGAATAGTTCTTTCTTTTCATTTTAAGTACAT	cat6		N	AAATCAATA:-7.7,AATAACCC:-5.1,TGATTTTA:-5.5,TTTAATTG:-7.8,ATTGATTT:-23.5,ATTTGAC:-8.9,TGACCTCT:-5.9,CTCTGTGTA:-6.2,TGTAATTA:-6.2,ATTATGGA:-5.6,TGGATATTAGTC:-6.7,AGTCAA:-6.7,TCAAAAAAA:-5.9,AAAATCAAA:-7.0,CAAAGAAT:-10.6,GAATAGTTCT:-5.3,TTCTTTCTTTT:-9.0,TTTTCATTTT:-5.7,TTTTAAGTA:-5.6,AGTACA:-6.9,TACATTTAA:-5.1	99	1	0	16	277	450	577	1176	57	27	2	39	106	177
ATCGAAAGGATGGGAGTACTAAGCTAGATAGGGGAAAGGATCTGTTTTTTTGTCTAAAAAAGAAAATCAAACTCTGTAGATGATAAATCATTCAAAAGATTTATTTATTGATTATTTAAGTAAAGGTCAGCACGGACAAAGTACTGAGAT	AGATAGGGGAAAGGATCTGTTTTTTTGTCTAAAAAAGAAAATCAAACTCTGTAGATGATAAATCATTCAAAAGATTTATTTATTGATTATTTAAGTAAAG	cat6		N	AGATAGGGGA:-6.7,GGGAAAGGATCT:-6.1,ATCTGTT:-9.3,TGTTTTTTTGT:-5.6,TTGTCTAAA:-5.3,TAAAAAAGAA:-6.9,AGAAAATCA:-9.0,ATCAAACTC:-5.7,ACTCTGTAG:-6.4,ATGATAAA:-7.1,TAAATCAT:-6.8,TCATTCA:-5.9,TTCAAAA:-5.8,AAAAGAT:-5.1,AGATTTATTT:-6.1,ATTTATTG:-12.8,ATTGATTA:-12.6,ATTATTT:-10.3,ATTTAAG:-10.1,TAAGTAA:-9.3,GTAAAGATCCT:-7.6	29	0	0	0	0	77	13	20	21	4	26	0	27	33
ATCGAAAGGATGGGAGTACTAAGCTTTTTCTTTCCACTTGGTCTTTTTGAGATTAAAATACATTAATGATTTATTGAAGTCATTAATTTATTTCCTGATTTATGGAGAAGATCAATTAATTACAAGTCAGCACGGACAAAGTACTGAGAT	TTTTCTTTCCACTTGGTCTTTTTGAGATTAAAATACATTAATGATTTATTGAAGTCATTAATTTATTTCCTGATTTATGGAGAAGATCAATTAATTACAA	cat6		N	TTTTCTTTCC:-5.8,TTCCACTTGGT:-5.6,TGGTCTTTTT:-5.1,TTTTGAGA:-5.6,GAGATTAA:-5.1,TTAAAATA:-5.4,AATACAT:-8.9,ACATTA:-13.4,ATTAATGA:-9.1,ATGATTT:-9.0,ATTTATTGA:-5.2,TTGAAGT:-5.5,AAGTCA:-9.9,GTCATTAA:-7.1,TTAATTTAT:-6.4,TTATTTCCTG:-6.2,CCTGATTT:-5.7,ATTTATGG:-7.1,ATGGAG:-6.0,AAGATC:-6.2,GATCAATT:-5.9,AATTAATTA:-6.6,ATTACAA:-6.4	178	0	1	0	0	258	11	63	15	6	0	0	4	4
ATCGAAAGGATGGGAGTACTAAGCTTGAATTATTGCTTTTCAAATACATGTGAAGTTCCTTTCTTTTCTTTACCTATCCTATCCTAATTAAATAAATCATTAAAAAAACAAAAACAAAAATGTATGTCAGCACGGACAAAGTACTGAGAT	TGAATTATTGCTTTTCAAATACATGTGAAGTTCCTTTCTTTTCTTTACCTATCCTATCCTAATTAAATAAATCATTAAAAAAACAAAAACAAAAATGTAT	cat6		N	TGAATTAT:-7.1,TTATTGCT:-7.6,TGCTTTTCA:-5.1,TTCAAATA:-5.5,AATACAT:-8.9,ACATGTG:-5.1,TGTGAAGTTCCT:-6.1,TCCTTTCTTT:-15.1,CTTTTCTTT:-12.8,CTTTACCT:-7.2,ACCTATCCTA:-7.4,CCTATCCTA:-7.8,CCTAAT:-11.2,TAATTAAAT:-10.7,AAATAAAT:-15.9,AAATCATT:-5.9,CATTAAAAA:-6.3,AAAAAACAAAA:-8.7,AAAAACAAAAA:-7.9,AAAATGT:-8.7,ATGTATG:-7.1	111	0	1	0	0	67	11	31	39	10	69	167	56	36
ATCGAAAGGATGGGAGTACTAAGCTTAAAGATCTTTAAGTAATGATTAATCAATAAATAATTCATTATGATAGGTAAAGATCCTAAAATGAAAATGAATTCTTTCTTTTTTAATGTGCTAAGTGAGTCAGCACGGACAAAGTACTGAGAT	TAAAGATCTTTAAGTAATGATTAATCAATAAATAATTCATTATGATAGGTAAAGATCCTAAAATGAAAATGAATTCTTTCTTTTTTAATGTGCTAAGTGA	cat6		N	TAAAGATC:-8.0,GATCTTTA:-8.0,TTTAAGTA:-7.3,AGTAATGA:-5.8,ATGATT:-12.5,GATTAAT:-23.0,TAATCAATA:-7.2,AATAAATAA:-10.8,ATAATTCAT:-5.1,TCATTATG:-6.7,TATGATA:-5.7,GATAGGTA:-7.4,GGTAAAGATCC:-7.3,ATCCTAAA:-5.3,TAAAATGAA:-5.1,TGAAAAT:-5.2,AAATGAAT:-6.4,GAATTCTT:-6.5,TCTTTCTTTTT:-10.7,TTTTTAAT:-13.3,TAATGTG:-6.6,TGTGCTAA:-5.1,CTAAGTG:-7.9,AGTGATTA:-8.2	88	0	0	0	0	5	0	8	0	0	0	0	0	0
ATCGAAAGGATGGGAGTACTAAGCTTATTGATCAATCAATCAGAAAGAAAGGATAGGATAGGTAAAATAATTAATAGACCAGGAAATAATTCATTTAATTGGATATTAAGAATTCTTTTTTCTTTGTCAGCACGGACAAAGTACTGAGAT	TATTGATCAATCAATCAGAAAGAAAGGATAGGATAGGTAAAATAATTAATAGACCAGGAAATAATTCATTTAATTGGATATTAAGAATTCTTTTTTCTTT	cat6		N	TATTG:-19.0,ATTGATCA:-7.6,ATCAATCAA:-7.7,TCAATCAG:-5.6,TCAGAAAG:-5.5,AAAGAAAGGA:-15.1,AGGATAGG:-6.6,TAGGATAGGT:-7.4,AGGTAAA:-6.2,TAAAATA:-13.0,AATAATTAA:-5.1,TTAATAGA:-7.5,TAGACCAGG:-6.6,CAGGAAATAA:-6.2,ATAATTCAT:-5.1,TCATTTAA:-5.9,TTAATTGG:-5.3,TTGGATATTA:-7.7,ATTAAGAA:-6.1,AGAATTCTTT:-5.4,CTTTTTTCTTT:-6.8	802	0	0	0	0	113	8	64	83	30	325	471	23	62
ATCGAAAGGATGGGAGTACTAAGCTAATGTCAAAAAAAAAAAAGAACTCAATTTAATTACTTAAATTTAATGCATTAACTGATTTAGAATTATGTGAAGTCAATTAGAATCAATCAATAAAAGAAGTCAGCACGGACAAAGTACTGAGAT	AATGTCAAAAAAAAAAAAGAACTCAATTTAATTACTTAAATTTAATGCATTAACTGATTTAGAATTATGTGAAGTCAATTAGAATCAATCAATAAAAGAA	cat6		N	AATGTCAA:-5.2,TCAAAAAAA:-5.9,AAAAAAAAAGA:-18.6,AAGAACTCA:-7.3,CTCAATT:-5.1,AATTTAATTA:-6.9,ATTACTTA:-7.4,CTTAAAT:-10.1,AAATTTAA:-5.2,TTAATGCA:-6.6,TGCATTA:-7.3,ATTAACTG:-5.8,ACTGA:-9.7,CTGATTTAG:-7.5,TTAGAAT:-7.3,GAATTATG:-5.3,TATGTGAAGT:-5.2,AAGTCAAT:-5.6,CAATTAG:-5.3,TTAGAAT:-7.3,GAATCAAT:-7.6,CAATCAATAA:-5.3,ATAAAAG:-6.9,AAAGAACTC:-6.9	47	0	0	0	0	19	2	15	1	2	17	0	5	11
ATCGAAAGGATGGGAGTACTAAGCTCCATTAGGATAGGTAAAGATCTTTTTTCTTTTTTTTTTTAATGGAAAGGAAATAATTTATTTAAATCATGCAATCAATCAAATAAATCTGTTTTTTTTTTGTCAGCACGGACAAAGTACTGAGAT	CCATTAGGATAGGTAAAGATCTTTTTTCTTTTTTTTTTTAATGGAAAGGAAATAATTTATTTAAATCATGCAATCAATCAAATAAATCTGTTTTTTTTTT	cat6		N	CCATTAG:-5.5,TTAGGATA:-6.2,GATAGGTAAAGATC:-7.4,GATCTTT:-8.7,CTTTTTTCTTT:-6.8,CTTTTTTTTT:-21.3,TTTTTTAAT:-6.0,TAATGGAA:-5.4,GGAAAGGA:-10.5,AGGAAATAAT:-5.2,TAATTTAT:-13.7,TTATTTAAA:-5.7,TAAATCAT:-6.8,TCATGCA:-5.2,TGCAAT:-5.8,CAATCAATCA:-5.3,ATCAAATAA:-5.5,ATAAATCT:-14.1,ATCT:-57.1,ATCTGTT:-9.3,TGTTTTTTT:-8.7,TTTTTTTTTA:-13.6	0	0	0	0	0	9	0	3	0	0	0	0	0	0
ATCGAAAGGATGGGAGTACTAAGCTATGCTTGAAATGATTTAGGATAGGTAAAGATCTTTCTTTGTTATTTGAATAGTTCTTTACCTATCCTAAATCATTTAAATAAATCATGTGAAGTTCCACTGTCAGCACGGACAAAGTACTGAGAT	ATGCTTGAAATGATTTAGGATAGGTAAAGATCTTTCTTTGTTATTTGAATAGTTCTTTACCTATCCTAAATCATTTAAATAAATCATGTGAAGTTCCACT	cat6		N	ATGCTTG:-5.2,AAATGATT:-7.3,GATTTAGGATAG:-7.0,ATAGGTAAAGA:-7.4,AAGATC:-6.2,GATCTTTC:-5.6,TTTCTTTGT:-5.7,TTGTTA:-7.2,GTTATTTG:-6.5,TTTGAATAGTTCTT:-5.9,TCTTTACCTAT:-7.4,CTATCCTAAATCA:-6.9,ATCATTTA:-5.9,TTTAAATAA:-5.7,ATAAATCA:-19.3,ATCATGT:-5.5,ATGTGAAGTTCC:-5.3,TTCCACTTGG:-5.3	1403	22	95	123	465	1076	402	766	153	212	79	59	126	69
ATCGAAAGGATGGGAGTACTAAGCTTAATTTTCTTTCTTCCTTCCTGGAACTATCCTAAATCAATAATACATCAATAAGTAATTTAATTATTAGAAAATTGATGGATGGCTTTTTGTCTCAAATGGTCAGCACGGACAAAGTACTGAGAT	TAATTTTCTTTCTTCCTTCCTGGAACTATCCTAAATCAATAATACATCAATAAGTAATTTAATTATTAGAAAATTGATGGATGGCTTTTTGTCTCAAATG	cat6		N	TAATTTTC:-5.9,TTTCTTTCT:-16.8,TTCTTCCTTCCT:-8.8,TCCTGGAACT:-7.2,AACTAT:-5.1,CTATCCTAAATCA:-6.9,ATCAATAAT:-5.3,TAATACA:-6.4,TACATCA:-7.3,ATCAATAAG:-5.1,TAAGTAA:-9.3,GTAATTTA:-6.4,TTTAATTAT:-7.1,TTATTAG:-6.5,TTAGAAAAT:-8.8,AAATTGAT:-9.6,TGATGGATGG:-5.1,ATGGCTTT:-8.6,CTTTTTGTCT:-5.6,GTCTCAAA:-5.6,CAAATGAA:-6.3	53	0	0	0	0	3	0	2	3	0	10	35	1	1
ATCGAAAGGATGGGAGTACTAAGCTTTAATCTCAAAAGAAAGGAACTTCTTTCTTTTCTTTTAATGGCCTTTAACATAAATCAAAAAAAAAAAAGAAAGGATCTTTACCTATCTGATGAAATAGAGTCAGCACGGACAAAGTACTGAGAT	TTAATCTCAAAAGAAAGGAACTTCTTTCTTTTCTTTTAATGGCCTTTAACATAAATCAAAAAAAAAAAAGAAAGGATCTTTACCTATCTGATGAAATAGA	cat6		N	TTAATCTC:-5.1,TCTCAAA:-11.0,CAAAAGA:-8.4,AAGAAAGG:-8.4,AAGGAACTTC:-5.2,CTTCTTTCTTT:-5.2,CTTTTCTTTT:-12.3,TTTTAATG:-9.1,AATGGCCT:-5.2,TTAACAT:-6.0,ACATAAATC:-5.3,AATCAAA:-10.4,CAAAAAAAAA:-15.4,AAAAAAAGA:-19.4,AAGAAAGG:-8.4,AAGGATCTTTAC:-7.6,TTACCTATC:-7.7,TATCTGA:-7.1,CTGATGAA:-5.7,TGAAATA:-8.1,AATAGAT:-11.5	76	13	14	39	38	19	16	2	12	7	2	1	1	7
ATCGAAAGGATGGGAGTACTAAGCTCAAATGAAGTTCCTTGTTTTTTGTTTTCATTTTTTAATGCAAATGAAGTTCCTTGTTCAATATGATGTATGTGAAGTTCCTTTCTTTTCTTTTTCTAAATGTCAGCACGGACAAAGTACTGAGAT	CAAATGAAGTTCCTTGTTTTTTGTTTTCATTTTTTAATGCAAATGAAGTTCCTTGTTCAATATGATGTATGTGAAGTTCCTTTCTTTTCTTTTTCTAAAT	cat6		N	CAAATGAA:-6.3,TGAAGTTCCTTG:-5.4,TTTTTTGTTTT:-6.6,TTTTCATTTT:-5.7,TTTTTTAA:-15.3,TTAATGCA:-6.6,TGCAAA:-8.4,CAAATGAA:-6.3,TGAAGTTCCTTG:-5.4,TTCAATAT:-5.7,ATATGA:-6.9,ATGATGTA:-6.3,TGTATG:-5.6,TATGTGAAGTTCCT:-6.4,TCCTTTCTTT:-15.1,CTTTTCTTTTT:-10.6,TTTTCTAAAT:-5.1	1632	701	760	1326	1595	1856	1060	1598	2266	1936	2020	3144	832	914
ATCGAAAGGATGGGAGTACTAAGCTGTAATGATTTTCTAAAATTAATTAAATATGTTTAATGGAAGAAAGAAAGAAGGATCTTAATTAAACTCAGGGTATAATTAAGCTCTTTACCTAAATCAGAGTCAGCACGGACAAAGTACTGAGAT	GTAATGATTTTCTAAAATTAATTAAATATGTTTAATGGAAGAAAGAAAGAAGGATCTTAATTAAACTCAGGGTATAATTAAGCTCTTTACCTAAATCAGA	cat6		N	GTAATG:-12.3,AATGATT:-11.3,GATTTTC:-7.9,TTTCTAAA:-8.4,TAAAATTA:-10.2,ATTAATTAA:-10.4,TTAAATAT:-5.9,ATATGTT:-6.3,TGTTTAAT:-6.5,TAATGGAAG:-5.3,GAAGAAAGA:-6.1,AAGAAAGAAGGA:-5.3,AGGATCTT:-5.9,TCTTAATT:-5.8,AATTAAAC:-7.1,AAACTCAGGG:-5.3,TATAATTA:-8.0,ATTAAGC:-10.9,TCTTTACCTA:-7.4,CCTAAATCAG:-6.4,TCAGATAGGG:-6.7	67	0	0	0	0	12	2	51	2	1	0	19	0	0
ATCGAAAGGATGGGAGTACTAAGCTTTTCTTTTTTGGTTTTTTAATGCAATTAAGAACTATTCAAATTAAATAAATTAAGAAAAGAAAGAAAGAACTCAACCACATGTGTTATTTTATTACTTAAGTCAGCACGGACAAAGTACTGAGAT	TTTCTTTTTTGGTTTTTTAATGCAATTAAGAACTATTCAAATTAAATAAATTAAGAAAAGAAAGAAAGAACTCAACCACATGTGTTATTTTATTACTTAA	cat6		N	TTTCTTTTTT:-25.9,TTTTGGTTTTT:-5.4,TTTTTAATG:-6.3,AATGCAATT:-5.1,AATTAAGA:-5.8,AAGAACTATTCAAA:-5.9,CAAATTAA:-5.2,TTAAATA:-14.7,AATAAATT:-9.5,AATTAAGA:-5.8,AAGAAAAGAA:-15.5,AGAAAGAAAGA:-11.8,AAGAACTCAA:-7.2,TCAACCA:-5.6,ACCACAT:-7.4,ACATGTG:-5.1,TGTGTTAT:-7.2,TTAT:-161.4,TTATTTTAT:-7.2,TTATTAC:-7.8,TTACTTAA:-8.0	85	0	0	0	1	11	1	1	4	5	286	217	11	6
ATCGAAAGGATGGGAGTACTAAGCTTTTTTGTTTTTTTTAATGCTTGCTTTTCTTTCCTTTCTTTCTTTTTAAAGAAAGGAAGGAAGAAAAAGAACTCAAATAATTCATTACATGTCAAATGGGGGTCAGCACGGACAAAGTACTGAGAT	TTTTTGTTTTTTTTAATGCTTGCTTTTCTTTCCTTTCTTTCTTTTTAAAGAAAGGAAGGAAGAAAAAGAACTCAAATAATTCATTACATGTCAAATGGGG	cat6		N	TTTTTGTTTTT:-7.9,TTTTTTTA:-16.0,TTTAATGC:-5.2,ATGCTTG:-5.2,CTTTTCTTTC:-6.2,TTTCCTTTC:-8.0,TTTCTTTCT:-16.8,TTCTTTTT:-25.2,TTTTAAAG:-5.4,AAAGAAAGGAA:-13.7,GGAAGGAAGA:-8.1,AAGAAAAAGA:-7.1,AAGAACTCAA:-7.2,TCAAATAA:-7.4,ATAATTCAT:-5.1,TCATTAC:-8.7,TTACATG:-6.0,CATGTCA:-6.6,GTCAAAT:-8.9,AAATGGGG:-6.3	228	68	74	174	215	402	200	560	190	404	701	1123	64	57
ATCGAAAGGATGGGAGTACTAAGCTATCATTACAAAGAATTCTTTTAATTTCATACATCATCTATCCTTTCCTTCTTTCTTTGAGTTTGATTTAGGATAGATGAAATTGCATTAAAATCTGTTGAGTCAGCACGGACAAAGTACTGAGAT	ATCATTACAAAGAATTCTTTTAATTTCATACATCATCTATCCTTTCCTTCTTTCTTTGAGTTTGATTTAGGATAGATGAAATTGCATTAAAATCTGTTGA	cat6		N	ATCATTA:-11.7,ATTACAA:-6.4,ACAAAGAATTC:-5.1,ATTCTTTT:-8.3,TTTTAATT:-10.3,AATTTCATA:-5.2,CATACAT:-7.1,ACATCAT:-7.2,TCATCTAT:-5.3,CTATCCT:-5.3,TCCTTTCCTT:-7.4,CCTTCTTTCT:-5.7,TTCTTTGAG:-5.5,TGAGTTTGAT:-5.2,TGATTTAGGATAG:-6.9,ATAGATGA:-5.3,ATGAAATT:-7.0,AATTGCAT:-7.4,GCATTAAA:-5.2,TAAAATC:-5.5,AATCTGTTG:-7.6,GTTGATTT:-7.4	1237	387	587	438	1254	1690	426	802	1040	1160	1098	1504	374	398
ATCGAAAGGATGGGAGTACTAAGCTCAAAAAAAAAAAAATATTTGATTAAAAAGAAAGAAAAAGAGATTCATGTTATTTAAATCAAAAAAAACAAAACAAAAAAAAAAAGAAAGAAGTTCCTTGAGTCAGCACGGACAAAGTACTGAGAT	CAAAAAAAAAAAAATATTTGATTAAAAAGAAAGAAAAAGAGATTCATGTTATTTAAATCAAAAAAAACAAAACAAAAAAAAAAAGAAAGAAGTTCCTTGA	cat6		N	CAAAAAAA:-11.9,AAAAAAAAAA:-22.0,AAAATATT:-8.0,TATTTGAT:-6.9,TGATTAAAA:-5.8,AAAAAGAAAGA:-10.7,AAGAAAAAG:-9.0,AAAGAGATT:-5.9,GATTCATG:-5.1,CATGTT:-6.7,TGTTAT:-6.6,TTATTTAAA:-5.7,TAAATCAA:-9.3,TCAAAAAAA:-5.9,AAAAACAAAA:-11.2,AAAACAAAAAA:-6.6,AAAAAAAAAG:-21.3,AAAGAAAGAAG:-5.2,GAAGTTCCTTGA:-5.4	0	0	0	0	0	0	0	0	0	0	0	0	0	0
ATCGAAAGGATGGGAGTACTAAGCTAATAAATAAATCAAGTCAATTATTTATTTGATTTAGGATAGGTAAAATCATGTATATGTTAATTTAATCAAACTTCACATAAAAAGAAAAAAGAAAGAAAGTCAGCACGGACAAAGTACTGAGAT	AATAAATAAATCAAGTCAATTATTTATTTGATTTAGGATAGGTAAAATCATGTATATGTTAATTTAATCAAACTTCACATAAAAAGAAAAAAGAAAGAAA	cat6		N	AATAAATAA:-10.8,ATAAATCAA:-6.2,TCAAGT:-5.4,AAGTCAAT:-5.6,CAATTAT:-5.9,TTAT:-161.4,TTATTTATT:-10.8,TATTTGATT:-5.8,GATTTAGGA:-7.2,AGGATAGGTAAA:-7.4,TAAAATCA:-5.5,ATCATGT:-5.5,ATGTATA:-7.7,TATATGT:-9.3,ATGTTAA:-6.0,TTAATTTA:-11.6,TTTAATC:-9.9,AATCAAACT:-5.2,AACTTCACA:-5.6,CACATAAAA:-6.4,AAAAAGAA:-25.2,AGAAAAAAGAA:-8.3,AGAAAGAAAGA:-11.8	29	0	0	0	0	3	0	0	0	0	1	1	1	2
ATCGAAAGGATGGGAGTACTAAGCTTGTAATCAATAATTAATTATTTGATTTATTTGACATTTATTTATTGATTTAGTAAAGATCCATCAGATAGGATAGGTCAAATGGATCTTTCTTTTTTCTTGTCAGCACGGACAAAGTACTGAGAT	TGTAATCAATAATTAATTATTTGATTTATTTGACATTTATTTATTGATTTAGTAAAGATCCATCAGATAGGATAGGTCAAATGGATCTTTCTTTTTTCTT	cat6		N	TGTAATCA:-6.1,ATCAATAA:-18.4,ATAATTAA:-14.1,TTAATTATT:-5.1,TATTTGATT:-5.8,GATTTATTT:-7.5,ATTTGAC:-8.9,TGACATTT:-6.3,ATTTATTTATT:-7.4,TATTGATTT:-7.7,ATTTAGTA:-5.6,AGTAA:-15.9,GTAAAGATCC:-7.2,ATCCATCA:-5.9,ATCAGATAGG:-7.6,TAGGATAGGT:-7.4,AGGTCA:-14.3,GTCAAAT:-8.9,AAATGGAT:-5.4,GGATCTTT:-6.0,CTTTCTTTTTT:-11.9,TTTTCTTTCC:-5.8	19	0	0	0	0	0	0	1	0	0	1	0	0	0
ATCGAAAGGATGGGAGTACTAAGCTAATCTCTTTCTTTCACATAAATCTAATGCATGATTAATTTAATTTTGTGTAATTAAAATGGGGTCATTAAGCAATAAAATAAAAAAAATAAATAAATCTAGTCAGCACGGACAAAGTACTGAGAT	AATCTCTTTCTTTCACATAAATCTAATGCATGATTAATTTAATTTTGTGTAATTAAAATGGGGTCATTAAGCAATAAAATAAAAAAAATAAATAAATCTA	cat6		N	AATCTCTTT:-5.9,CTTTCTTTC:-10.9,TTTCACAT:-5.4,ACATAAATC:-5.3,AATCTAAT:-5.9,TAATGCA:-7.3,TGCATG:-7.7,CATGAT:-6.9,TGATTAAT:-14.4,TAATTTAA:-6.4,TTAATTTT:-12.8,TTTTGTGT:-7.5,AATTAAAA:-10.3,AAAATGGG:-6.7,TGGGGTCA:-5.6,GTCATTAA:-7.1,TTAAGCA:-5.4,AGCAATAAA:-6.4,TAAAATAAA:-8.7,TAAAAAAAA:-15.4,AAAATAAATA:-5.8,AATAAATCT:-6.6,ATCTATA:-5.2	85	0	0	0	0	2	0	7	0	1	29	29	2	2
ATCGAAAGGATGGGAGTACTAAGCTATTTAGACCAGGAAATAATTCATTGATTTTTTTAATAAAATAAATCTGATTTAGGATATTAGTCAATTACTTAAAATGAATTGATTTACCTAAATCTGTTGTCAGCACGGACAAAGTACTGAGAT	ATTTAGACCAGGAAATAATTCATTGATTTTTTTAATAAAATAAATCTGATTTAGGATATTAGTCAATTACTTAAAATGAATTGATTTACCTAAATCTGTT	cat6		N	ATTTAGA:-6.9,TAGACCAGG:-6.6,CAGGAAATAA:-6.2,ATAATTCA:-7.1,TTCAT:-50.4,TCATTGATT:-5.3,GATTTTTTT:-5.3,TTTTAATA:-6.1,AATAAAATA:-6.3,AATAAATCT:-6.6,ATCTGATTTAGGAT:-6.8,GGATATTAGTC:-7.0,AGTCAA:-6.7,TCAATTACT:-5.6,TACTTAAA:-7.3,TAAAATGAA:-5.1,TGAATTG:-6.4,ATTGATTTA:-6.4,TTTACC:-5.3,TACCTA:-5.7,CCTAAATC:-7.9,AATCTGTTGG:-5.5	54	0	0	0	0	0	0	2	1	0	53	52	0	0
ATCGAAAGGATGGGAGTACTAAGCTCCAATCTGTTTAAATAAATCAGATAGGGTTAAGATTTATTTCAAATAAAATGGGAAAGGATCTTTTTCTTTTCTTTCAATTAAGTAAAAAAGAAAGAAGGGTCAGCACGGACAAAGTACTGAGAT	CCAATCTGTTTAAATAAATCAGATAGGGTTAAGATTTATTTCAAATAAAATGGGAAAGGATCTTTTTCTTTTCTTTCAATTAAGTAAAAAAGAAAGAAGG	cat6		N	CCAATCTGTT:-5.3,TGTTTAAA:-7.9,TAAATAAATC:-5.6,AATCAG:-7.6,TCAGATAGGG:-6.7,TTAAGAT:-10.1,AGATTTAT:-14.1,TTATTTC:-13.7,TTTCAAAT:-5.3,AAATAAAA:-6.5,AAAATGGG:-6.7,TGGGAAAGGATCTTT:-6.9,CTTTTTCTTT:-9.7,CTTTTCTTTC:-6.2,TTTCAATTA:-6.7,ATTAAGT:-10.7,AAGTAAA:-8.5,TAAAAAAGAA:-6.9,AGAAAGAAGGA:-5.1	584	0	28	9	24	133	25	67	7	0	74	0	0	11
ATCGAAAGGATGGGAGTACTAAGCTTTTACCTTCTTGATTTTCTTTTTTAAATGATTTGAAATAATTAAGTAAAGATCCTTTCTTTCTTAATTATTGATTTTAATGGAAGAAAGAAAGAAAAAAAGTCAGCACGGACAAAGTACTGAGAT	TTTACCTTCTTGATTTTCTTTTTTAAATGATTTGAAATAATTAAGTAAAGATCCTTTCTTTCTTAATTATTGATTTTAATGGAAGAAAGAAAGAAAAAAA	cat6		N	TTTACCT:-6.2,ACCTTCTTGA:-5.7,TTGATTTTCT:-10.2,TTCTTTTTTA:-6.9,TTTAAATG:-5.2,AATGATTT:-5.9,ATTTGAAA:-5.3,GAAATAA:-13.7,ATAATTAA:-14.1,TTAAGTAA:-8.0,GTAAAGATCCTT:-7.6,CCTTTCTTTC:-9.6,TTTCTTAA:-6.2,TTAATTAT:-14.1,TTATTGATTT:-5.9,ATTTTAAT:-6.9,TAATGGAAG:-5.3,GAAGAAAGA:-6.1,AAGAAAGAA:-16.3,AGAAAAAAAA:-5.7	0	0	0	0	0	3	0	0	0	0	0	0	0	0
ATCGAAAGGATGGGAGTACTAAGCTAAATCATGAAGTTCCTTGATCTTTCAAGTTTTAGGATAAATGAAAGAAAATCAAATGAAAAATCAATAAACAGATTGATTTCATAAATTAATCAAACAATGTCAGCACGGACAAAGTACTGAGAT	AAATCATGAAGTTCCTTGATCTTTCAAGTTTTAGGATAAATGAAAGAAAATCAAATGAAAAATCAATAAACAGATTGATTTCATAAATTAATCAAACAAT	cat6		N	AAATCAT:-9.0,TCATGAA:-5.7,TGAAGTT:-9.7,AGTTCCTTGATC:-5.3,GATCTTTC:-5.6,TTTCA:-45.0,TTCAAGT:-5.4,AAGTTTTA:-6.1,TTTAGGATA:-5.7,GATAAATG:-8.4,AATGAAA:-10.0,GAAAGAAA:-18.0,GAAAATCAAA:-5.5,CAAATGA:-12.6,ATGAAAAAT:-6.6,AAATCAATAA:-5.9,ATAA:-161.4,ATAAACA:-8.2,AACAGATTG:-5.9,ATTGATTT:-23.5,ATTTCATA:-5.1,CATAAATTA:-5.9,ATTAATCA:-14.4,ATCAAAC:-5.2,AAACAATG:-6.3	314	0	35	38	42	119	90	59	59	104	0	122	18	54
ATCGAAAGGATGGGAGTACTAAGCTCATTAAATCAAAGAATTCATTTATCTGTTGGTGCACATAAAACTCAGGGAAGAAAGAAGGATCTTTACCTATCCTAAATCAAATAAATTCATTAGGAAATGTCAGCACGGACAAAGTACTGAGAT	CATTAAATCAAAGAATTCATTTATCTGTTGGTGCACATAAAACTCAGGGAAGAAAGAAGGATCTTTACCTATCCTAAATCAAATAAATTCATTAGGAAAT	cat6		N	CATTAAAT:-7.4,AAATCAAA:-8.2,CAAAGAAT:-10.6,GAATTCATT:-5.3,CATTTATC:-8.4,TATCTGT:-5.5,CTGTTGGTG:-5.7,CACATAAAAC:-6.1,AAACTCAGGG:-5.3,AAGAAAGAAGG:-6.4,AAGGATCTTTACCTA:-7.2,CCTATCCTA:-7.8,CCTAAATC:-7.9,AATCAAATA:-5.8,AATAAATT:-9.5,AATTCATT:-8.4,CATTAGGA:-5.9,AGGAAATAA:-5.3	514	209	191	262	416	445	767	694	102	33	0	0	18	1
ATCGAAAGGATGGGAGTACTAAGCTACATTTATTTCAAATTCATTAATCAATCAAACTCAATTTAATTCAATATTGATTAATGATTGATTTAGGATAATTAATGATTAATTAAGTAAATCACATAGTCAGCACGGACAAAGTACTGAGAT	ACATTTATTTCAAATTCATTAATCAATCAAACTCAATTTAATTCAATATTGATTAATGATTGATTTAGGATAATTAATGATTAATTAAGTAAATCACATA	cat6		N	ACATTTAT:-7.1,TTATTTCA:-5.5,TTCAAAT:-8.0,AAATTCAT:-6.6,TCATTAATC:-5.3,AATCAATCA:-8.1,ATCAAACTCA:-5.2,CTCAATT:-5.1,AATTTAATT:-10.6,AATTCAA:-5.6,TCAATATT:-5.3,TATTGATT:-21.9,GATTAATG:-11.2,AATGATT:-11.3,GATTGATT:-9.3,GATTTAGGATA:-7.1,GATAATTA:-5.7,ATTAATG:-17.3,AATGATTAA:-6.1,TTAATTAA:-16.4,TTAAGTAAA:-5.6,TAAATCAC:-8.8,TCACATAA:-5.1	131	0	0	0	0	1	0	0	0	0	141	47	1	2
ATCGAAAGGATGGGAGTACTAAGCTTAATGCATTATTTCCTTGATCTTTACCTATCTGATGAAAATGATTTATAAAGAACTCAAGATCAATATTGATTTTTTTGTTTGAGTTAATTAAGATGGATGTCAGCACGGACAAAGTACTGAGAT	TAATGCATTATTTCCTTGATCTTTACCTATCTGATGAAAATGATTTATAAAGAACTCAAGATCAATATTGATTTTTTTGTTTGAGTTAATTAAGATGGAT	cat6		N	TAATGCA:-7.3,TGCATTA:-7.3,ATTATTTCC:-5.6,TTCCTTGATC:-6.1,GATCTTTACCTATC:-7.4,TATCTGA:-7.1,CTGATGAA:-5.7,TGAAAAT:-5.2,AAATGATT:-7.3,GATTTATA:-5.3,TATAAAGAAC:-6.5,GAACTCAAGA:-5.9,AAGATC:-6.2,GATCAA:-10.0,TCAATATT:-5.3,TATTGATTTT:-5.6,TTTTTTTGTT:-5.1,TGTTTGAGTT:-6.2,AGTTAAT:-11.1,TAATTAAG:-8.9,TAAGAT:-6.2,AGATGGATG:-5.8	773	18	125	148	365	721	213	157	43	0	6	0	8	31
ATCGAAAGGATGGGAGTACTAAGCTTTTAATCAATTACTGATTGAAAAACAAAAAAAAAGAAAGAACTATTTTATTTGATTTTCTTTTTTAATGGCCTTGCAATTTAAGTAATTTATTTTATTGCGTCAGCACGGACAAAGTACTGAGAT	TTTAATCAATTACTGATTGAAAAACAAAAAAAAAGAAAGAACTATTTTATTTGATTTTCTTTTTTAATGGCCTTGCAATTTAAGTAATTTATTTTATTGC	cat6		N	TTTAATCAA:-5.9,TCAATTACT:-5.6,TACTGA:-6.4,CTGATTGA:-5.6,TTGAAAAAC:-5.3,AAACAAAAA:-6.7,AAAAAAAAGA:-20.4,AAGAAAGA:-13.0,AAGAACTATT:-6.8,TATTTTAT:-7.3,TTATTTGA:-7.4,TTGATTTTC:-10.6,TTTCTTTTTT:-25.9,TTTTAATG:-9.1,AATGGCCT:-5.2,TGCAAT:-5.8,CAATTTAA:-5.5,TTAAGTAA:-8.0,GTAATTTA:-6.4,TTTATTTTAT:-6.1,TTATTGCT:-7.6	218	0	0	0	0	54	8	107	72	63	488	360	30	30
ATCGAAAGGATGGGAGTACTAAGCTTTTTGTGTTTGAGTTCTTTTTTTCTTCCTTCCTTTTCTTTTTTCTTTTTTTTTTGTTTTTTTATTGATTAATGCAATTCATTTATCTTAAGTTTTAATTAGTCAGCACGGACAAAGTACTGAGAT	TTTTGTGTTTGAGTTCTTTTTTTCTTCCTTCCTTTTCTTTTTTCTTTTTTTTTTGTTTTTTTATTGATTAATGCAATTCATTTATCTTAAGTTTTAATTA	cat6		N	TTTTGTGTT:-5.5,TGTTTGAGT:-6.0,GAGTTCTT:-5.4,TCTTTTTTTCT:-6.1,TTCTTCCTTCCT:-8.8,TCCTTTTCTTT:-7.5,CTTTTTTCTT:-6.7,TCTTTTTTTTT:-18.6,TTTTTGTTTTT:-7.9,TTTTTTATT:-5.6,TATTGATT:-21.9,GATTAATG:-11.2,AATGCAATT:-5.1,AATTCATT:-8.4,CATTTATC:-8.4,TATCTTAA:-9.3,TTAAGT:-18.7,AAGTTTTA:-6.1,TTTA:-139.7,TTTAATTA:-20.2	163	0	0	0	1	176	5	80	32	12	240	583	132	122
ATCGAAAGGATGGGAGTACTAAGCTATGACATGTCCTGGAAAGGATCTTTCTTTCATTTCATAAATCTAATTATGTGAAGTTCCTAAATCAGATAGGGGACTAATCAATATCCAACTCATATCTAGTCAGCACGGACAAAGTACTGAGAT	ATGACATGTCCTGGAAAGGATCTTTCTTTCATTTCATAAATCTAATTATGTGAAGTTCCTAAATCAGATAGGGGACTAATCAATATCCAACTCATATCTA	cat6		N	ATGACA:-17.1,GACATG:-6.4,CATGTC:-6.4,TGTCCTGGAA:-8.1,GGAAAGGATCTT:-7.0,TCTTTCTTTC:-11.1,TTTCATT:-10.0,CATTTCAT:-5.2,TCATAAATC:-5.3,AATCTAAT:-5.9,TAATTATG:-5.7,TATGTGAAGTTCCT:-6.4,TCCTAAATCAGAT:-6.8,AGATAGGGGA:-6.7,GGGACTAAT:-6.7,TAATCAATA:-7.2,AATATCCAAC:-5.6,CAACTCAT:-5.5,TCATAT:-6.9,ATATCTA:-6.4	2091	813	602	1265	1115	1125	632	536	474	192	709	562	129	74
ATCGAAAGGATGGGAGTACTAAGCTAGGATAGGTAAAGAAAAAAGAAGAAGAACTTCATTAAAAACAAAAAAACAAATGAAATCAAGGAACTCAAACAAAGAATTCATGTTGGATATTAGTCCCCGTCAGCACGGACAAAGTACTGAGAT	AGGATAGGTAAAGAAAAAAGAAGAAGAACTTCATTAAAAACAAAAAAACAAATGAAATCAAGGAACTCAAACAAAGAATTCATGTTGGATATTAGTCCCC	cat6		N	AGGATAG:-5.3,ATAGGTAAAGA:-7.4,AAGAAAAAAG:-6.7,AAAGAAGAAGA:-5.1,AAGAAC:-7.0,GAACTTCA:-6.5,TTCATT:-24.2,CATTAAAAA:-6.3,AAAACAAAAA:-6.4,AAAAAACAAA:-7.8,CAAATGAA:-6.3,TGAAATCAA:-5.3,TCAAGGAACT:-5.3,AACTCAA:-9.2,TCAAACAA:-6.4,ACAAAGAATTC:-5.1,ATTCATG:-6.4,CATGTT:-6.7,TGTTGGATATTAGT:-5.1,TAGTCCCCTA:-7.2	614	323	164	375	208	263	35	118	477	400	250	404	9	89
ATCGAAAGGATGGGAGTACTAAGCTAATCACTTTAAAACAAAAAGAAAGAAAGAAAGAAAAAAGAATTCATTTTAATTAAAAAAAATCAAATAATTAAGAATTCTTTCATGAATTTATGTGATAAGTCAGCACGGACAAAGTACTGAGAT	AATCACTTTAAAACAAAAAGAAAGAAAGAAAGAAAAAAGAATTCATTTTAATTAAAAAAAATCAAATAATTAAGAATTCTTTCATGAATTTATGTGATAA	cat6		N	AATCACTTT:-5.9,CTTTAAAA:-5.4,AAAACAAA:-12.0,CAAAAAGA:-5.4,AAGAAAGAA:-16.3,AGAAAGAAAGA:-11.8,AAGAAAAAAG:-6.7,AAAGAATTC:-6.5,ATTCATTT:-6.4,ATTTTAAT:-6.9,TAATTAAA:-20.2,TAAAAAAAA:-15.4,AAAATCAA:-18.3,TCAAATA:-10.3,AATAATTA:-6.0,ATTAAGAA:-6.1,AGAATTCTTT:-5.4,CTTTCATG:-5.2,CATGAAT:-6.4,GAATTTAT:-6.3,TTATGTGA:-5.1,GTGATAAAT:-5.1	1	0	0	0	0	0	0	0	0	0	0	0	0	0
ATCGAAAGGATGGGAGTACTAAGCTTTGATTATCATTATGTGAAGTTCCTTTCCTTTTGTCAAATAACAAAAAAACAGATTGGATATTAGTCCCCTAAATCAAACTCAAAAAAAAACATATTTAAGTCAGCACGGACAAAGTACTGAGAT	TTGATTATCATTATGTGAAGTTCCTTTCCTTTTGTCAAATAACAAAAAAACAGATTGGATATTAGTCCCCTAAATCAAACTCAAAAAAAAACATATTTAA	cat6		N	TTGATTAT:-6.4,TTAT:-161.4,TTATCAT:-7.3,TCATTATG:-6.7,TATGTGAAGTTCCT:-6.4,TCCTTTCCTT:-7.4,CCTTTTGT:-5.2,TTGTCAAA:-5.1,CAAATAAC:-6.5,TAACAA:-7.2,ACAAAAAAACA:-5.6,AACAGATTGG:-5.3,TTGGATATTAGT:-7.3,TAGTCCCCTA:-7.2,CCTAAATCA:-7.8,ATCAAACTCA:-5.2,CTCAAAAAA:-5.9,AAAAAAACA:-8.7,AACATAT:-6.3,ATATTTAA:-5.9	160	91	49	19	218	301	39	134	124	106	234	29	107	116
ATCGAAAGGATGGGAGTACTAAGCTCCTTTTGTTAATGACATACATACATAAAACCAAGTGGATTCTTTTTTTTAATAGATGATTAATTAAATCAAATATTTTTGAGAATTCTAATGGAGATGTAGTCAGCACGGACAAAGTACTGAGAT	CCTTTTGTTAATGACATACATACATAAAACCAAGTGGATTCTTTTTTTTAATAGATGATTAATTAAATCAAATATTTTTGAGAATTCTAATGGAGATGTA	cat6		N	CCTTTTGT:-5.2,TTGTTA:-7.2,GTTAATGA:-7.4,ATGACAT:-13.6,ACATACAT:-5.1,ACATACAT:-5.1,ACATAAAACC:-5.8,AACCAAGTGG:-6.0,ATTCTTTTTT:-5.1,TTTTTTAA:-15.3,TTAATAG:-7.4,ATAGATGA:-5.3,ATGATTAAT:-6.4,TAATTAAAT:-10.7,AAATCAAATA:-5.3,AATATTTT:-8.0,TTTTTGAGA:-6.2,GAGAATTC:-5.4,ATTCTAA:-7.3,CTAATGG:-5.5,ATGGAG:-6.0,ATGTATGT:-5.1	33	0	0	0	0	6	0	0	0	0	144	0	9	11
ATCGAAAGGATGGGAGTACTAAGCTTGATTAATGAAAGAAAAGAAAAGGAACTTCACAAAAGAATTTATGTAATGATTTATTTATTTGAGACATGCATTTATCCTAAATCTTTTCTTTCAAATACGTCAGCACGGACAAAGTACTGAGAT	TGATTAATGAAAGAAAAGAAAAGGAACTTCACAAAAGAATTTATGTAATGATTTATTTATTTGAGACATGCATTTATCCTAAATCTTTTCTTTCAAATAC	cat6		N	TGATTAATG:-7.6,AATGAAA:-10.0,GAAAGAAAAG:-6.2,AAAGAAAAGG:-6.0,AAGGAACTTCAC:-5.4,TCACAAAA:-5.4,AAAAGAAT:-8.3,GAATTTATG:-5.1,TATGTAA:-5.5,GTAATGA:-8.7,ATGATTTAT:-5.5,TTATTTAT:-6.9,TTATTTG:-11.2,TTTGAGACA:-5.2,GACATG:-6.4,CATGCA:-7.7,TGCATT:-6.9,CATTTATC:-8.4,TATCCTAAA:-5.7,TAAATCTTT:-7.0,CTTTTCTTTC:-6.2,TTTCA:-45.0,TTCAAATA:-5.5,AATACAT:-8.9	394	0	9	10	44	239	39	67	156	159	146	348	107	111
ATCGAAAGGATGGGAGTACTAAGCTTTTAAATAAACAGATTGGATATTAGTCAACCAAGTGGAAGGAAGAATCAATCAATTAAGTGGCTGCATTAAATCTTTTTTAATTTAATTTAATTACAAAAGTCAGCACGGACAAAGTACTGAGAT	TTTAAATAAACAGATTGGATATTAGTCAACCAAGTGGAAGGAAGAATCAATCAATTAAGTGGCTGCATTAAATCTTTTTTAATTTAATTTAATTACAAAA	cat6		N	TTTAAATAA:-5.7,ATAAACA:-8.2,AACAGATTGG:-5.3,TTGGATATTAGTC:-6.9,AGTCAA:-6.7,TCAACCA:-5.6,ACCAAGTGGAA:-5.6,GGAAGGAAGA:-8.1,AAGAATCAA:-5.8,TCAATCAAT:-6.4,CAATTAAG:-7.1,TAAGTGG:-6.5,CTGCAT:-11.4,GCATTAAA:-5.2,TAAATCTT:-9.3,TCTTTTTT:-18.7,TTTTAATT:-10.3,AATTTAATT:-10.6,AATTTAATTA:-6.9,ATTACAA:-6.4,ACAAAAAGAC:-5.1	0	0	0	0	0	8	0	6	1	0	0	0	10	6
ATCGAAAGGATGGGAGTACTAAGCTGATTTAGGATAGATGAAATGAAATCATTTATCTTTTGTTTTTTCTTAAAAAGATGTATTGATTAATTACCTTATTGATTGATGGATGTCATTAGGTTATTGTCAGCACGGACAAAGTACTGAGAT	GATTTAGGATAGATGAAATGAAATCATTTATCTTTTGTTTTTTCTTAAAAAGATGTATTGATTAATTACCTTATTGATTGATGGATGTCATTAGGTTATT	cat6		N	GATTTAGGATAG:-7.0,ATAGATGA:-5.3,ATGAAATG:-5.2,AATGAAAT:-6.7,AAATCATT:-5.9,CATTTATCT:-6.1,ATCTTTT:-5.1,TTTTGTTTTT:-11.2,TTTTTCTT:-12.6,TCTTAAAAA:-5.7,AAAAGAT:-5.1,AGATGTAT:-5.6,GTATTGAT:-5.9,TGATTAA:-16.7,TTAATTAC:-5.6,TTACCTTA:-5.1,CTTATTGAT:-5.1,TGATTGAT:-10.4,TGATGGATG:-10.4,GATGTCA:-7.2,GTCATTA:-6.2,ATTAGGTT:-5.5,GGTTATT:-6.0	867	0	1	2	4	743	86	714	486	221	1499	1786	315	323
ATCGAAAGGATGGGAGTACTAAGCTTCCATTAGGATATTAGTCCCCTAATTAGCTGTCAAATTGATAAATCAATAACAAAGAATTCATTAAAAACCAAAACAAAAAAACAAATCAGGAAATAAATGTCAGCACGGACAAAGTACTGAGAT	TCCATTAGGATATTAGTCCCCTAATTAGCTGTCAAATTGATAAATCAATAACAAAGAATTCATTAAAAACCAAAACAAAAAAACAAATCAGGAAATAAAT	cat6		N	TCCAT:-23.4,CCATTAG:-5.5,TTAGGATA:-6.2,GATATTAGT:-7.7,TAGTCCCCTA:-7.2,CCTAATT:-5.7,AATTAGC:-10.4,TGTCAAAT:-5.2,AAATTGAT:-9.6,TGATAAAT:-8.9,AAATCAATA:-7.7,AATAAC:-9.5,TAACAA:-7.2,ACAAAGAATTC:-5.1,ATTCATT:-12.5,CATTAAAAA:-6.3,AAAACCAAAA:-5.4,AAAACAAA:-12.0,CAAAAAAA:-11.9,AAAACAAAT:-6.2,AAATCAGG:-5.7,CAGGAAATAA:-6.2,ATAAATA:-9.6	42	1	0	34	144	190	143	157	4	7	0	0	117	86
ATCGAAAGGATGGGAGTACTAAGCTAATCTGTTGGATATTAGTCAATTTATTTTATTTCCTTTCCTTGATCCACTTGGTTGATTAGCAAAGTGATAATTCTTTTTCTTTCTTTCATTTTACCTAAGTCAGCACGGACAAAGTACTGAGAT	AATCTGTTGGATATTAGTCAATTTATTTTATTTCCTTTCCTTGATCCACTTGGTTGATTAGCAAAGTGATAATTCTTTTTCTTTCTTTCATTTTACCTAA	cat6		N	AATCTGTTGG:-5.5,TTGGATATTAGTC:-6.9,AGTCAA:-6.7,TCAATTTA:-6.9,TTTATTTTAT:-6.1,TTATTTCCT:-5.3,TCCTTTCCTT:-7.4,CCTTGATCCA:-5.6,TCCACTTGGTTGA:-6.1,TTGATTA:-18.8,ATTAGCA:-5.6,AGCAAAGTG:-6.1,AGTGATAA:-5.2,ATAATTC:-8.3,ATTCTTTT:-8.3,TTTTTCTTTC:-7.6,TTTCTTTC:-18.0,TTTCA:-45.0,TTCATTTTA:-5.1,TTTACC:-5.3,TACCTA:-5.7,CCTAAATCAGAT:-6.8	658	429	464	468	989	1259	451	577	318	260	267	312	110	121
ATCGAAAGGATGGGAGTACTAAGCTTTTAATGGCTTTTATTTTATCTTAAATCAAAGAATTAAAATTGAAATAAAATAGCACTTATTTGAGTTCCTTGATCTTTTGTCAAATAAATAATTTAATGGTCAGCACGGACAAAGTACTGAGAT	TTTAATGGCTTTTATTTTATCTTAAATCAAAGAATTAAAATTGAAATAAAATAGCACTTATTTGAGTTCCTTGATCTTTTGTCAAATAAATAATTTAATG	cat6		N	TTTAATGG:-5.6,ATGGCTTT:-8.6,CTTTTAT:-6.9,TTATTTTAT:-7.2,TTATCTTA:-5.5,CTTAAAT:-10.1,AAATCAAA:-8.2,CAAAGAATT:-6.8,AATTAAAAT:-6.0,AAATTGAA:-5.2,TGAAATA:-8.1,AATAAAATA:-6.3,AATAGCAC:-5.3,TTATTTGA:-7.4,TTGAGTT:-9.2,AGTTCCTTGATC:-5.3,GATCTT:-6.2,TCTTTTG:-8.4,TTTGTCA:-6.6,GTCAAAT:-8.9,AAATAAATAA:-8.1,ATAATTTA:-7.6,TTTAATGC:-5.2	351	0	0	0	0	2	0	2	0	0	22	28	3	0
ATCGAAAGGATGGGAGTACTAAGCTAAAATGGGAAAGGATCAAGGATAGGTAAATCATTACTTAAAAAAAAAAGAAAAGATCCTTTCCCATTAATTACCTAAATCAAATATCCAACATCATCTATGTCAGCACGGACAAAGTACTGAGAT	AAAATGGGAAAGGATCAAGGATAGGTAAATCATTACTTAAAAAAAAAAGAAAAGATCCTTTCCCATTAATTACCTAAATCAAATATCCAACATCATCTAT	cat6		N	AAAATGGG:-6.7,TGGGAAAGGAT:-6.6,GGATCAAGGA:-5.3,AGGATAGG:-6.6,TAGGTAAA:-7.1,TAAATCAT:-6.8,TCATTAC:-8.7,TTACTTA:-9.3,CTTAAAAA:-5.3,AAAAAAAA:-29.8,AAAAAGAAAAG:-10.6,AAAGATCCTTTCCCA:-6.9,CCCATTAA:-5.9,TTAATTAC:-5.6,TTACCTA:-7.4,CCTAAAT:-8.5,AAATCAA:-30.5,TCAAATA:-10.3,AATATCCAACAT:-5.1,ACATCAT:-7.2,TCATCTAT:-5.3	192	27	55	8	168	330	216	385	0	0	74	0	0	0
ATCGAAAGGATGGGAGTACTAAGCTTCAGTTAATTAAATTACTGATTGATTCTCAAATGAAATAAATAGATTTATTTCAAATAGATTAATGAATTATTATATGTTAATTTATTACACAGAGAAAAGTCAGCACGGACAAAGTACTGAGAT	TCAGTTAATTAAATTACTGATTGATTCTCAAATGAAATAAATAGATTTATTTCAAATAGATTAATGAATTATTATATGTTAATTTATTACACAGAGAAAA	cat6		N	TCAGT:-9.7,CAGTTAAT:-5.8,TAATTAAA:-20.2,TAAATTAC:-6.4,TTACTGA:-6.2,CTGATTGA:-5.6,TTGATTCT:-6.9,TTCTCAAA:-5.7,CAAATGAA:-6.3,TGAAATAA:-5.5,ATAAATA:-9.6,AATAGAT:-11.5,AGATTTATT:-6.6,TATTTCA:-8.1,TTCAAATA:-5.5,AATAGATT:-6.8,GATTAATG:-11.2,AATGAAT:-12.5,GAATTAT:-8.3,TTATTATA:-6.3,TATATGT:-9.3,ATGTTAA:-6.0,TTAATTTAT:-6.4,TTATTACA:-5.7,TACACAGAG:-6.2,AGAGAAAA:-6.4	0	0	0	0	0	0	0	0	0	0	0	0	0	0
ATCGAAAGGATGGGAGTACTAAGCTACATATAAGTCAAATGAGTTAATTGGATATTAATCAGATAGGTAAATCATTGATTTTCTTTTTTTCTTTCCTTGATCTTTACCTATCCTAAATGATTTAGGTCAGCACGGACAAAGTACTGAGAT	ACATATAAGTCAAATGAGTTAATTGGATATTAATCAGATAGGTAAATCATTGATTTTCTTTTTTTCTTTCCTTGATCTTTACCTATCCTAAATGATTTAG	cat6		N	ACATATA:-9.3,TATAAGT:-5.6,AAGTCA:-9.9,GTCAAAT:-8.9,AAATGAGTT:-5.1,AGTTAAT:-11.1,TAATTGG:-6.1,TTGGATATTA:-7.7,ATTAATCA:-14.4,ATCAGATAG:-8.2,ATAGGTAAA:-8.1,TAAATCAT:-6.8,TCATTGATT:-5.3,GATTTTCT:-10.5,TTCTTTTTTT:-24.3,TTTTCTTTCC:-5.8,TTCCTTGATC:-6.1,GATCTTTACCTATC:-7.4,TATCCTAA:-6.2,CTAAATGA:-5.3,ATGATT:-12.5,GATTTAGG:-7.9	1808	75	320	400	1658	3008	1211	2415	252	321	161	482	45	67
ATCGAAAGGATGGGAGTACTAAGCTTGTAATTAAGTAATGATTTATGTGAAGTTCCTTCTTTCTTTTTTTTATGACATGAATCTTTTTCTTTACCTATCCTAAATAAATCTAATGGGAAAGGATCGTCAGCACGGACAAAGTACTGAGAT	TGTAATTAAGTAATGATTTATGTGAAGTTCCTTCTTTCTTTTTTTTATGACATGAATCTTTTTCTTTACCTATCCTAAATAAATCTAATGGGAAAGGATC	cat6		N	TGTAATTA:-6.2,ATTAAGTA:-8.6,AGTAATGA:-5.8,ATGATTTAT:-5.5,TTATGTGAAGTTCCTT:-5.6,CCTTCTTTCT:-5.7,TTCTTTTTTTT:-20.7,TTTTATGA:-5.8,ATGACA:-17.1,GACATG:-6.4,CATGAATC:-5.1,AATCTTT:-10.3,CTTTTTCTTT:-9.7,CTTTACCT:-7.2,ACCTATCCTAAAT:-7.3,AAATAAATC:-7.5,AATCTAAT:-5.9,TAATGGG:-7.7,TGGGAAAGGATCTTT:-6.9	580	16	201	255	503	761	347	646	157	271	179	0	36	45
ATCGAAAGGATGGGAGTACTAAGCTACTGTTGGTGGCTTAAAAAATGGGGTCAAATAACAATTAATCTCAAAAAAAAAACAAAATCAATTTCATTAATCAAATATTTTTCTTTCAAATGTGAAAAGTCAGCACGGACAAAGTACTGAGAT	ACTGTTGGTGGCTTAAAAAATGGGGTCAAATAACAATTAATCTCAAAAAAAAAACAAAATCAATTTCATTAATCAAATATTTTTCTTTCAAATGTGAAAA	cat6		N	ACTGT:-5.3,CTGTTGGTGG:-6.8,CTTAAAAA:-5.3,AAAAATGGG:-6.0,TGGGGTCA:-5.6,GTCAAAT:-8.9,AAATAAC:-6.2,TAACAA:-7.2,ACAATTAA:-6.6,TTAATCTC:-5.1,TCTCAAAA:-5.6,AAAAAAAA:-29.8,AAAAAACAAAA:-8.7,AAAATCA:-18.9,ATCAATT:-15.9,AATTTCAT:-7.0,TCATTAATC:-5.3,AATCAAATA:-5.8,AATATTTT:-8.0,TTTTTCTTTC:-7.6,TTTCAAAT:-5.3,AAATGTG:-6.2,TGTGAAA:-8.5,GAAAAAGAA:-5.3	102	0	0	0	0	33	0	20	26	23	0	76	47	30
ATCGAAAGGATGGGAGTACTAAGCTTTTGTTTTTTTTTGGTTGAGTTCCAGGACTAATAGATTTAGGATAGGGGAAAGGATCTTTCTTTCTTTGAGAATTGATTTTAAGATCCTTTCTTTTCTTTGTCAGCACGGACAAAGTACTGAGAT	TTTGTTTTTTTTTGGTTGAGTTCCAGGACTAATAGATTTAGGATAGGGGAAAGGATCTTTCTTTCTTTGAGAATTGATTTTAAGATCCTTTCTTTTCTTT	cat6		N	TTTGTTTTTTT:-6.7,TTTTTTGGT:-6.1,TGGTTGA:-5.6,TTGAGTTC:-7.4,GTTCCAGGAC:-5.3,GGACTAATA:-6.1,AATAGATT:-6.8,GATTTAGGATA:-7.1,GATAGGGGA:-7.4,GGGAAAGGATC:-6.1,GATCTTT:-8.7,CTTTCTTTCT:-12.2,TTCTTTGAG:-5.5,TGAGAATT:-5.1,AATTGATTTT:-5.3,TTTTAAGA:-5.6,AAGATCCT:-5.9,TCCTTTCTTT:-15.1,CTTTTCTTTT:-12.3	567	342	212	436	824	1243	380	607	64	74	0	0	13	3
ATCGAAAGGATGGGAGTACTAAGCTATAAATAAAATTAGGGGTCATTATGATATTAGTCCCCTAAATCATTCATTTGAAAGAAAAGAAAGGAAAGAAAATCAAGGAACTTCATTAAATGAGTTCTGTCAGCACGGACAAAGTACTGAGAT	ATAAATAAAATTAGGGGTCATTATGATATTAGTCCCCTAAATCATTCATTTGAAAGAAAAGAAAGGAAAGAAAATCAAGGAACTTCATTAAATGAGTTCT	cat6		N	ATAAATAAA:-9.6,TAAAATTA:-10.2,ATTAGGGG:-5.1,TCATTATG:-6.7,TATG:-48.8,TATGATA:-5.7,GATATTAGT:-7.7,TAGTCCCCTA:-7.2,CCTAAATC:-7.9,AATCAT:-12.5,TCATTCA:-5.9,TTCATTTG:-6.3,TTTGAAA:-7.4,GAAAGAAAAG:-6.2,AAAGAAAGGAA:-13.7,GGAAAGAAAA:-5.8,AAAATCAA:-18.3,TCAAGGAACT:-5.3,AACTTCA:-9.7,TTCATT:-24.2,CATTAAAT:-7.4,AAATGAGT:-5.4,GAGTTCTT:-5.4	72	14	109	87	59	87	29	7	65	108	231	269	34	23
ATCGAAAGGATGGGAGTACTAAGCTTTGATCAATTCATTAATCCATTAAGCAATAAATTGAAAAACAAAAGAAAGAAGAAGAAAAAAGAAAGGAAAGGATCTTTTTCTTTCTTTTTCATTAAGTAGTCAGCACGGACAAAGTACTGAGAT	TTGATCAATTCATTAATCCATTAAGCAATAAATTGAAAAACAAAAGAAAGAAGAAGAAAAAAGAAAGGAAAGGATCTTTTTCTTTCTTTTTCATTAAGTA	cat6		N	TTGATC:-10.0,GATCAAT:-10.0,CAATTCA:-6.4,TTCATT:-24.2,CATTAATC:-11.2,AATCCAT:-5.3,CCATTAA:-12.2,TTAAGCAA:-5.5,GCAATAAA:-7.5,TAAATTGA:-6.9,TTGAAAAAC:-5.3,AAACAAAA:-9.7,AAAAGAAAG:-11.5,AAAGAAGAAGA:-5.1,AAGAAAAAAG:-6.7,AAAGAAAGGAA:-13.7,GGAAAGGATCTT:-7.0,TCTTTTTCTTT:-9.1,CTTTCTTTTT:-10.5,TTTTCAT:-7.5,TCATTAAG:-5.1,TAAGTAA:-9.3	340	15	194	72	177	242	79	65	30	63	85	0	25	10
ATCGAAAGGATGGGAGTACTAAGCTTCAATTTAATTAATTAATTTACTTAAAAAAAAAAGAATCAATATTAGTCCCCTATCTGATTTAGGGGACTAATTTCATAAAATGGATCTTTACCTATCCTGTCAGCACGGACAAAGTACTGAGAT	TCAATTTAATTAATTAATTTACTTAAAAAAAAAAGAATCAATATTAGTCCCCTATCTGATTTAGGGGACTAATTTCATAAAATGGATCTTTACCTATCCT	cat6		N	TCAATTTA:-6.9,TTTAATTA:-20.2,ATTAATTA:-16.4,ATTAATTTA:-5.1,TTTACTTAA:-5.6,TTAAAAAAAAA:-5.6,AAAAAGAA:-25.2,AGAATCAA:-6.9,TCAATATT:-5.3,TATTAGTCCC:-7.0,TCCCCTATCT:-6.7,ATCTGATTTAGG:-6.8,TAGGGGACTA:-7.2,ACTAATT:-5.5,AATTTCATA:-5.2,CATAAAATG:-5.7,AATGGAT:-6.9,GGATCTTTAC:-7.2,TTACCTATC:-7.7,TATCCTAA:-6.2	1	0	0	0	0	0	0	0	0	0	0	0	0	0
ATCGAAAGGATGGGAGTACTAAGCTGGAAAGGATCTATTGATTTTTTATTAATGATTAATTAATTAAAATCAATAAATAAAGATCCTTCTTTCTTCTTCTTTCTTTTTTTTTCTTTTTTTCTTTCGTCAGCACGGACAAAGTACTGAGAT	GGAAAGGATCTATTGATTTTTTATTAATGATTAATTAATTAAAATCAATAAATAAAGATCCTTCTTTCTTCTTCTTTCTTTTTTTTTCTTTTTTTCTTTC	cat6		N	GGAAAGGATCT:-6.4,ATCTATT:-11.5,TATTGATTTT:-5.6,TTTTTTATT:-5.6,TATTAAT:-5.4,TAATGAT:-11.7,TGATTAAT:-14.4,TAATTAATT:-6.6,AATTAAAAT:-6.0,AAATCAATAA:-5.9,ATAAATAAA:-9.6,TAAAGATCCT:-7.6,TCCTTCTTTCTT:-5.3,TCTTCTTCTTT:-5.1,CTTTCTTTTT:-10.5,TTTTTTTTCT:-5.7,TTCTTTTTTT:-24.3,TTTTCTTTC:-12.3	3	1	0	1	1	0	0	0	0	0	0	0	0	0
ATCGAAAGGATGGGAGTACTAAGCTAATAAATCAATTTGAAAATGGGGAGCAATAAATAAATGTGAAGTTCCTTCTTTCTTTTTCTTTTTTCTTTTTATGTGTTATTACATCAAAAAAAAAATCAGTCAGCACGGACAAAGTACTGAGAT	AATAAATCAATTTGAAAATGGGGAGCAATAAATAAATGTGAAGTTCCTTCTTTCTTTTTCTTTTTTCTTTTTATGTGTTATTACATCAAAAAAAAAATCA	cat6		N	AATAAATC:-12.4,AATCAATTT:-6.1,ATTTGAA:-8.0,TGAAAAT:-5.2,AAATGGGG:-6.3,AGCAATAA:-7.6,ATAAATAA:-6.9,ATAAATGT:-7.1,ATGTGAAGTTCCTT:-5.8,CCTTCTTTCT:-5.7,TTCTTTTTCT:-6.6,TTCTTTTTTCT:-8.3,TTCTTTTT:-25.2,TTTTATGTG:-6.4,TGTGTTAT:-7.2,TTATTACA:-5.7,TACATCAA:-5.5,TCAAAAAAAAA:-5.3,AAAAATCAA:-5.7	39	0	1	1	109	326	161	292	8	2	105	1	62	41
ATCGAAAGGATGGGAGTACTAAGCTATAAATAAAAAAGAAAAAAGAAAGAAGTTCCTTGAAAAACAAAAAAAAAACAAGAACTCAAGGAACTCAAGAAGGTCATTAAGTGGTAAGTAATGTCAAAGTCAGCACGGACAAAGTACTGAGAT	ATAAATAAAAAAGAAAAAAGAAAGAAGTTCCTTGAAAAACAAAAAAAAAACAAGAACTCAAGGAACTCAAGAAGGTCATTAAGTGGTAAGTAATGTCAAA	cat6		N	ATAAATAAA:-9.6,TAAAAAAGAA:-6.9,AGAAAAAAGA:-6.1,AAGAAAGAAG:-5.7,GAAGTTCCTTGA:-5.4,TTGAAAAAC:-5.3,AAACAAAAA:-6.7,AAAAAAAAAC:-8.5,AAACAAGA:-5.3,AAGAACTCAA:-7.2,TCAAGGAACT:-5.3,AACTCAA:-9.2,TCAAGAAGGT:-5.7,AGGTCAT:-10.1,TCATTAAG:-5.1,TAAGTGG:-6.5,TAAGTAA:-9.3,GTAATG:-12.3,AATGTCA:-11.8,GTCAAAT:-8.9	16	1	9	2	38	42	3	2	0	5	105	0	6	12
ATCGAAAGGATGGGAGTACTAAGCTTTATTACATCAAACAAGAAAGAAGTTCCTTCTTGAGTTCTTCCTTCCTTTCTTTCATGCATTAATTAAAACTTAATTAAGACAAAGAATTATCATTAAGTGTCAGCACGGACAAAGTACTGAGAT	TTATTACATCAAACAAGAAAGAAGTTCCTTCTTGAGTTCTTCCTTCCTTTCTTTCATGCATTAATTAAAACTTAATTAAGACAAAGAATTATCATTAAGT	cat6		N	TTATTACA:-5.7,TACATCA:-7.3,ATCAAAC:-5.2,AAACAAGA:-5.3,AAGAAAGAAG:-5.7,GAAGTTCCTT:-5.2,CCTTCTTGAG:-5.2,TGAGTTCTT:-7.3,TCTTCCTTCCT:-9.1,TCCTTTCTTT:-15.1,CTTTCATG:-5.2,CATGCA:-7.7,TGCATTA:-7.3,ATTAATTAAA:-5.9,TAAAACTT:-6.1,ACTTAAT:-10.7,TAATTAAG:-8.9,TAAGACAAA:-5.1,CAAAGAAT:-10.6,GAATTAT:-8.3,TTATCAT:-7.3,TCATTAAG:-5.1,TAAGTAAT:-7.4	273	7	62	94	120	376	108	251	262	218	545	436	172	106
ATCGAAAGGATGGGAGTACTAAGCTTTTTAGCACATTTGAAAGGAAAGATGACATGTCATTAAGTAATTGATCTTTACCTATCCTAAATCAATTAAGCAAATAAATCTTTACCTAAATCAGTTAAGTCAGCACGGACAAAGTACTGAGAT	TTTTAGCACATTTGAAAGGAAAGATGACATGTCATTAAGTAATTGATCTTTACCTATCCTAAATCAATTAAGCAAATAAATCTTTACCTAAATCAGTTAA	cat6		N	TTTTAG:-5.3,TTAGCACA:-5.1,CACATTT:-6.2,ATTTGAAA:-5.3,GAAAGGAAA:-8.0,GAAAGAT:-7.4,AGATGA:-14.7,ATGACA:-17.1,GACATG:-6.4,CATGTCA:-6.6,GTCATTA:-6.2,ATTAAGTA:-8.6,AGTAATTGA:-5.6,TTGATC:-10.0,GATCTTTACCTATC:-7.4,TATCCTAAATCA:-6.9,ATCAATTA:-9.1,ATTAAGCA:-6.4,AGCAAATA:-5.1,AATAAATCT:-6.6,ATCT:-57.1,ATCTTTACCTA:-6.8,CCTAAATCAG:-6.4,TCAGT:-9.7,CAGTTAAT:-5.8	637	165	192	107	1006	1335	520	1168	148	231	66	59	45	44
ATCGAAAGGATGGGAGTACTAAGCTTGTTGGATATTGATCAATAATCAAACAAAAGGAACTTCACATAAAATCATAAATCAATCAGATAGATTTATTCAAAAAAAAAAAAGAAGGTGGACTAATAGTCAGCACGGACAAAGTACTGAGAT	TGTTGGATATTGATCAATAATCAAACAAAAGGAACTTCACATAAAATCATAAATCAATCAGATAGATTTATTCAAAAAAAAAAAAGAAGGTGGACTAATA	cat6		N	TGTTGGATATT:-5.3,TATTG:-19.0,ATTGATCA:-7.6,ATCAATAA:-18.4,ATAATCAA:-6.4,TCAAACAA:-6.4,ACAAAAGG:-5.2,AAGGAACTTCAC:-5.4,TCACATAAA:-5.3,TAAAATCA:-5.5,ATCATA:-6.4,CATAAATC:-16.1,AATCAATC:-9.3,AATCAG:-7.6,TCAGATAG:-7.0,ATAGATT:-5.6,GATTTATT:-12.4,TATTCAAA:-5.5,CAAAAAAAAA:-15.4,AAAAAAAGAA:-24.3,AGAAGGTGGAC:-5.4,GGACTAATA:-6.1	26	0	0	1	14	86	7	20	8	1	0	0	4	20
ATCGAAAGGATGGGAGTACTAAGCTAATTGATTTAGGATCTTTACCTATCCTAAATTGATTTCATTTTAATGGATTAATACATCATTATGCAAATTGATCAATTAATGGCAAAGCCATAAATTGAGTCAGCACGGACAAAGTACTGAGAT	AATTGATTTAGGATCTTTACCTATCCTAAATTGATTTCATTTTAATGGATTAATACATCATTATGCAAATTGATCAATTAATGGCAAAGCCATAAATTGA	cat6		N	AATTGATT:-14.9,GATTTAGGAT:-7.2,GGATCTTTAC:-7.2,TTACCTAT:-7.2,CTATCCTAAA:-6.8,TAAATTGA:-6.9,TTGATTTCA:-5.3,TTCATTTTA:-5.1,TTTAATGG:-5.6,ATGGATT:-5.3,GATTAATA:-6.1,AATACAT:-8.9,ACATCAT:-7.2,TCATTATG:-6.7,TATGCA:-7.1,TGCAAAT:-5.6,AAATTGAT:-9.6,TGATCAAT:-7.6,CAATTAAT:-5.3,TAATGGC:-7.4,AAAGCCAT:-8.6,CCATAAAT:-7.1,AAATTGAAT:-5.3	217	2	0	23	326	727	257	363	0	0	0	1	3	1
ATCGAAAGGATGGGAGTACTAAGCTTAATTTATGTGAAGTTCCTTTCCTTTCTTTTTTTTTCTAAAGAACTTCATTATTTCCTAAATCAGATTTATTAGTCCTGGAACTCAAGAACTCAAACAGAGTCAGCACGGACAAAGTACTGAGAT	TAATTTATGTGAAGTTCCTTTCCTTTCTTTTTTTTTCTAAAGAACTTCATTATTTCCTAAATCAGATTTATTAGTCCTGGAACTCAAGAACTCAAACAGA	cat6		N	TAATTTATG:-5.9,TATGTGAAGTTCCT:-6.4,TCCTTTCCTT:-7.4,CCTTTCTT:-8.4,TCTTTTTTTTT:-18.6,TTTTCTAAA:-7.5,TAAAGAAC:-8.9,GAACTTCA:-6.5,TTCATTAT:-8.0,TTATTTCCT:-5.3,TCCTAAATCAGAT:-6.8,AGATTTATT:-6.6,TATTAGTCC:-6.1,GTCCTGGAAC:-5.3,GAACTCAAGA:-5.9,AAGAACTCA:-7.3,CTCAAACA:-7.1,AACAGATTG:-5.9	338	37	97	72	485	949	241	410	400	361	411	310	312	264
ATCGAAAGGATGGGAGTACTAAGCTAAATTTAAGTAAAGATCCTAAATCAGATAAATGGATATTAGTCCCCTATCCTTTCCTTCTTTCTTTCTGATTTAGAAATCATTAGGGGAAAATAAATATCGTCAGCACGGACAAAGTACTGAGAT	AAATTTAAGTAAAGATCCTAAATCAGATAAATGGATATTAGTCCCCTATCCTTTCCTTCTTTCTTTCTGATTTAGAAATCATTAGGGGAAAATAAATATC	cat6		N	AAATTTAA:-5.2,TTAAGTAAA:-5.6,TAAAGATCCT:-7.6,TCCTAAATCAGAT:-6.8,AGATAAATG:-6.1,AATGGA:-13.5,TGGATATTAGT:-7.1,TAGTCCCCTA:-7.2,CCTATCCT:-6.6,TCCTTTCCTT:-7.4,CCTTCTTTCTTT:-5.3,CTTTCTGA:-5.5,CTGATTTA:-14.4,TTTA:-139.7,TTTAGAAA:-8.4,GAAATCA:-8.9,ATCATTA:-11.7,ATTAGGGG:-5.1,AAAATAAATA:-5.8,AATATCCAAC:-5.6	848	295	325	333	316	390	189	364	366	205	216	238	38	37
ATCGAAAGGATGGGAGTACTAAGCTTTTAAATGAGTTTAATTGCATTAAAAAAAAACAAAAAAAAAAACAAAAAAAAGAACTTCACATAAAATGAGTTCCTTGATCTTTACCTCATAAAAGAAAGGTCAGCACGGACAAAGTACTGAGAT	TTTAAATGAGTTTAATTGCATTAAAAAAAAACAAAAAAAAAAACAAAAAAAAGAACTTCACATAAAATGAGTTCCTTGATCTTTACCTCATAAAAGAAAG	cat6		N	TTTAAATG:-5.2,AATGAGTT:-6.3,AGTTTAATT:-5.3,AATTGCAT:-7.4,GCATTAAA:-5.2,TAAAAAAAAA:-13.6,AAAACAAAAAA:-6.6,AAAAAAAAAC:-8.5,AAACAAAA:-9.7,AAAAAAAAGA:-20.4,AAGAAC:-7.0,GAACTTCACATA:-5.5,CATAAAAT:-8.4,AAATGAGTT:-5.1,AGTTCCTTGATC:-5.3,GATCTTTACCT:-7.4,ACCTCAT:-5.1,TCATAAAA:-5.8,AAAAGAAAGAA:-9.0	0	0	0	0	3	18	5	34	0	2	0	0	7	9
ATCGAAAGGATGGGAGTACTAAGCTGAACTTCATCTTTACTTAAATTGATTCATGATGAGTTCTTTCTTTCTTTTTCTTTTTTTTGAGATTAAATTGACTTAGACCAGGAAATAATTAATCACAAGTCAGCACGGACAAAGTACTGAGAT	GAACTTCATCTTTACTTAAATTGATTCATGATGAGTTCTTTCTTTCTTTTTCTTTTTTTTGAGATTAAATTGACTTAGACCAGGAAATAATTAATCACAA	cat6		N	GAACTTCA:-6.5,TTCAT:-50.4,TCATCT:-14.7,ATCTTTAC:-7.8,TTACTTAA:-8.0,TTAAATTG:-5.5,ATTGATTC:-7.6,ATTCATGA:-5.2,ATGATG:-11.6,GATGAG:-5.9,TGAGTTCTTT:-7.8,CTTTCTTTCT:-12.2,TTCTTTTTCTT:-6.7,TCTTTTTT:-18.7,TTTTTTGAGA:-6.1,GAGATTAA:-5.1,TTAAATTG:-5.5,ATTGACTT:-5.6,ACTTAGA:-6.0,TAGACCAGG:-6.6,CAGGAAATAA:-6.2,ATAATTAA:-14.1,TTAATCAC:-5.5,TCACAAAA:-5.4	217	46	46	102	619	793	458	638	342	219	469	273	214	292
ATCGAAAGGATGGGAGTACTAAGCTTGAATTGATTTTTGAGAATTCAATTTAGATATGTTGGTGGTTGATTTAGGAACTTCACATAATTAATCTCTTCCTTCCTTGATCTTTCTTTCTTTTTTTTGTCAGCACGGACAAAGTACTGAGAT	TGAATTGATTTTTGAGAATTCAATTTAGATATGTTGGTGGTTGATTTAGGAACTTCACATAATTAATCTCTTCCTTCCTTGATCTTTCTTTCTTTTTTTT	cat6		N	TGAATTG:-6.4,ATTGATTTT:-15.1,TTTTTGAGA:-6.2,GAGAATTC:-5.4,ATTCAATTT:-5.3,ATTTAGA:-6.9,TAGATAT:-6.4,ATATGTT:-6.3,TGTTGGTGGT:-5.9,TGGTTGAT:-8.2,TGATTTAGGA:-6.9,AGGAACTTCACATA:-6.4,CATA:-48.8,CATAATT:-10.2,AATTAATC:-6.1,AATCTCTT:-5.1,TCTTCCTTCC:-8.1,TTCCTTGATC:-6.1,GATCTTT:-8.7,CTTTCTTTCT:-12.2,TTCTTTTT:-25.2,TTTTTTTTGC:-5.9	2488	1295	1299	2032	2427	3116	820	1599	1442	1047	1261	1771	69	58
ATCGAAAGGATGGGAGTACTAAGCTATTTAAGTACATCATCTATCCTAAAAGAAAAGAACTCAAAAAAAAGAAAAAGAAAGAAGTTCCTTGAGTTCCAGGACTAATAAATAAATAAATCAATTAAGTCAGCACGGACAAAGTACTGAGAT	ATTTAAGTACATCATCTATCCTAAAAGAAAAGAACTCAAAAAAAAGAAAAAGAAAGAAGTTCCTTGAGTTCCAGGACTAATAAATAAATAAATCAATTAA	cat6		N	ATTTAAGT:-6.8,AAGTA:-11.3,AGTACA:-6.9,TACATCAT:-6.3,TCATCTAT:-5.3,CTATCCTAA:-6.7,CTAAAA:-5.3,AAAAGAAAAGA:-11.0,AAGAACTCA:-7.3,CTCAAAAAA:-5.9,AAAAAAGA:-18.7,AAGAAAAAG:-9.0,AAAGAAAGAAG:-5.2,GAAGTTCCTTGA:-5.4,TTGAGTTC:-7.4,GTTCCAGGAC:-5.3,GGACTAATA:-6.1,AATAAATAA:-10.8,ATAAATAAAT:-8.1,AAATCAATT:-6.2,AATTAATTAA:-5.3	0	0	0	0	29	62	20	33	0	0	0	0	31	41
ATCGAAAGGATGGGAGTACTAAGCTTTTGAGAAAGAAAAAAGAAAATCAAGGAACTTCATTAGTCCCCTATCATACATGTGACATGAAAGAATCACTTTTTGTCTCAAATGAATTATGTGAAGTTGTCAGCACGGACAAAGTACTGAGAT	TTTGAGAAAGAAAAAAGAAAATCAAGGAACTTCATTAGTCCCCTATCATACATGTGACATGAAAGAATCACTTTTTGTCTCAAATGAATTATGTGAAGTT	cat6		N	TTTGAGAA:-5.7,AGAAAGAA:-17.9,AGAAAAAAGAA:-8.3,AGAAAATCAA:-10.2,TCAAGGAACTTC:-5.4,CTTCATTA:-6.1,ATTAGTCCC:-6.7,TCCCCTATC:-7.4,TATCATA:-5.7,CATACAT:-7.1,ACATGTG:-5.1,TGTGACA:-5.5,GACATG:-6.4,CATGAAAG:-5.2,AAAGAATC:-5.6,AATCACTTT:-5.9,CTTTTTGTCT:-5.6,GTCTCAAA:-5.6,CAAATGAA:-6.3,TGAATTAT:-7.1,TTATGTGAAGTTCCTT:-5.6	296	219	146	187	2018	1864	803	969	409	149	308	282	474	547
ATCGAAAGGATGGGAGTACTAAGCTTAATCACTTAGATATGTTGGATATTAGTCCCCTAAATCAAACTCTGTAGCTGATTTAGGATAGGGGAAAGGATCTTAATGAGATCAATCAATCAAAAAAAGTCAGCACGGACAAAGTACTGAGAT	TAATCACTTAGATATGTTGGATATTAGTCCCCTAAATCAAACTCTGTAGCTGATTTAGGATAGGGGAAAGGATCTTAATGAGATCAATCAATCAAAAAAA	cat6		N	TAATCACT:-8.2,CACTTAGA:-5.3,TAGATAT:-6.4,ATATGTTG:-5.4,GTTGGATATTAGT:-5.3,TAGTCCCCTA:-7.2,CCTAAATCA:-7.8,ATCAAACTC:-5.7,ACTCTGTAG:-6.4,CTGATTTAG:-7.5,TTAGGATA:-6.2,GATAGGGGA:-7.4,GGGAAAGGATCT:-6.1,ATCTTA:-6.2,CTTAATG:-9.3,AATGAGAT:-5.6,AGATCA:-5.6,ATCAATCAA:-7.7,TCAATCAA:-6.4,TCAAAAAAAAA:-5.3	267	177	134	187	1127	1274	1647	1831	71	161	2	0	0	0
ATCGAAAGGATGGGAGTACTAAGCTCTAATATCCTAAAGAACTTCACATTTTTTTTTGCTTAATAGCAATTAGCTCTTGAGTTCTTTATTTTACTTAAATCTGTTGGATATTAGTCCCCTATCTGGTCAGCACGGACAAAGTACTGAGAT	CTAATATCCTAAAGAACTTCACATTTTTTTTTGCTTAATAGCAATTAGCTCTTGAGTTCTTTATTTTACTTAAATCTGTTGGATATTAGTCCCCTATCTG	cat6		N	CTAATATCC:-5.3,ATCCTAAA:-5.3,TAAAGAAC:-8.9,GAACTTCACAT:-5.2,ACATTTT:-8.7,TTTTTTTTTGC:-5.3,TTGCTTAA:-5.5,TTAATAGC:-5.6,AATTAGC:-10.4,TCTTGAGTTC:-5.9,GTTCTTTA:-8.9,TTTATTTTA:-8.7,TTTACTTAA:-5.6,TTAAATC:-6.4,AATCTGTTG:-7.6,GTTGGATATTAGT:-5.3,TAGTCCCCTA:-7.2,CCTATCTGAT:-7.6	119	61	60	41	895	1158	669	782	91	58	95	101	401	451
ATCGAAAGGATGGGAGTACTAAGCTTCCACCTTCTTGTTAAAATGTCATTAATTGGATATTAGTCAATTACTAAATCAATCAGATAAATGTCAAATCAATAATTAATCAAGGAACTTCACATAAAGTCAGCACGGACAAAGTACTGAGAT	TCCACCTTCTTGTTAAAATGTCATTAATTGGATATTAGTCAATTACTAAATCAATCAGATAAATGTCAAATCAATAATTAATCAAGGAACTTCACATAAA	cat6		N	TCCACCTTCTTG:-5.2,TTAAAATG:-5.1,AATGTCA:-11.8,GTCATTAA:-7.1,TTAATTGG:-5.3,TTGGATATTAGTC:-6.9,AGTCAA:-6.7,TCAATTACT:-5.6,TACTAAAT:-5.6,AAATCAA:-30.5,TCAATCAG:-5.6,TCAGATA:-7.1,GATAAATG:-8.4,AATGTCA:-11.8,GTCAAAT:-8.9,AAATCAATA:-7.7,AATAATTAA:-5.1,TTAATCAA:-10.3,TCAAGGAACT:-5.3,AACTTCACA:-5.6,CACATAAAA:-6.4	840	0	11	10	146	683	217	512	556	423	332	384	120	199
ATCGAAAGGATGGGAGTACTAAGCTTTCTTTTTTAGGATATTAGAAAATTAAATTGAATTATTTGATTCTTTGTTTGAGTTCTTTTTCTTTTTTCTTTCTTCCTTTCCTTCTTTCTTTTTTCTCAGTCAGCACGGACAAAGTACTGAGAT	TTCTTTTTTAGGATATTAGAAAATTAAATTGAATTATTTGATTCTTTGTTTGAGTTCTTTTTCTTTTTTCTTTCTTCCTTTCCTTCTTTCTTTTTTCTCA	cat6		N	TTCTTTTTTA:-6.9,TTTAGGAT:-5.3,GGATATTAG:-5.3,TTAGAAAAT:-8.8,AAATTAAAT:-5.3,AAATTGAA:-5.2,TGAATTAT:-7.1,TTATTTGA:-7.4,TTGATTCTT:-5.8,TCTTTGTT:-8.8,TGTTTGAG:-7.1,TGAGTTCTT:-7.3,TCTTTTTCTTT:-9.1,CTTTTTTCTT:-6.7,TCTTTCTTCCT:-7.4,TCCTTTCCTT:-7.4,CCTTCTTTCT:-5.7,TTCTTTTTTC:-7.8,TTTCTCAA:-5.1	309	0	1	0	9	227	16	113	34	14	707	986	86	61
ATCGAAAGGATGGGAGTACTAAGCTGATTTTAATTGATTTAAGTAAAGATCCTTTCCTTTTTCTTTTTCTTGAGTTCTTTATTTGATTTTCTTTTTTTTTTTTATTTCAATTAGGTTTTATGTCAGTCAGCACGGACAAAGTACTGAGAT	GATTTTAATTGATTTAAGTAAAGATCCTTTCCTTTTTCTTTTTCTTGAGTTCTTTATTTGATTTTCTTTTTTTTTTTTATTTCAATTAGGTTTTATGTCA	cat6		N	GATTTTA:-5.5,TTTAATTG:-7.8,ATTGATTT:-23.5,ATTTAAG:-10.1,TAAGTAA:-9.3,GTAAAGATCCTT:-7.6,CCTTTCCTTT:-5.5,CTTTTTCTTT:-9.7,CTTTTTCTT:-9.0,TCTTGAGTTC:-5.9,GTTCTTTAT:-7.7,TTATTTGA:-7.4,TTGATTTTCT:-10.2,TTCTTTTTTT:-24.3,TTTTTTTTTAT:-5.3,TTAT:-161.4,TTATTTC:-13.7,TTTCAATTA:-6.7,ATTAGGTT:-5.5,GGTTTTATGT:-5.8,ATGTCAA:-9.2	127	0	0	0	1	63	2	40	4	1	0	4	10	8
ATCGAAAGGATGGGAGTACTAAGCTTTAAATTGATTGATTCTTTCTTCTTTTGTGAAAGAAAATCAATTTCATAATTAACTCATTTAGATATTAGTCAATCAATTAATGAGTTCTTTCTTCTTCTGTCAGCACGGACAAAGTACTGAGAT	TTAAATTGATTGATTCTTTCTTCTTTTGTGAAAGAAAATCAATTTCATAATTAACTCATTTAGATATTAGTCAATCAATTAATGAGTTCTTTCTTCTTCT	cat6		N	TTAAATTG:-5.5,ATTGATTGA:-6.4,TTGATTCTT:-5.8,TCTTTCTTCTT:-6.4,TCTTTTGTG:-5.4,TGTGAAA:-8.5,GAAAGAAAA:-12.3,AAAATCAATT:-5.3,AATTTCATA:-5.2,CATAATTA:-5.7,ATTAACT:-11.1,AACTCATTT:-5.1,ATTTAGA:-6.9,TAGATAT:-6.4,ATATTAGTC:-7.0,AGTCAA:-6.7,TCAATCAAT:-6.4,CAATTAAT:-5.3,TAATGAG:-12.3,TGAGTTCTT:-7.3,TCTTTCTTC:-6.1,CTTCTTCTTT:-6.4	499	0	0	0	7	315	28	101	351	210	327	529	112	93
ATCGAAAGGATGGGAGTACTAAGCTTCATTAATTAAACAAAGCAATTCTTTAAAAAGAAAGAAGAAGAAAAAAAAAGAAAAGAAAAATCAATTAATTTATGATAGGTAAAGATCTTTACCTATCCGTCAGCACGGACAAAGTACTGAGAT	TCATTAATTAAACAAAGCAATTCTTTAAAAAGAAAGAAGAAGAAAAAAAAAGAAAAGAAAAATCAATTAATTTATGATAGGTAAAGATCTTTACCTATCC	cat6		N	TCATTAAT:-9.1,TAATTAAAC:-5.6,AAACAAAG:-7.4,AAAGCAATT:-5.7,AATTCTTT:-6.5,CTTTAAAA:-5.4,AAAAAGAAAG:-10.5,AAAGAAGAAGA:-5.1,AAGAAAAA:-12.6,AAAAAAAAG:-23.6,AAAGAAAAGA:-13.3,AAGAAAAA:-12.6,AAAATCAATT:-5.3,AATTAATTT:-6.7,ATTTATGA:-7.2,ATGATA:-11.8,GATAGGTAAAGATC:-7.4,GATCTTTACCTATC:-7.4,TATCCTAAA:-5.7	20	0	0	0	0	5	1	0	0	0	0	0	0	0
ATCGAAAGGATGGGAGTACTAAGCTCATTCTTTCATGATTTTTAAAGAAAAAGAAGAAAGAACTCAAAAAAAAAAAACATGAATCAATTTAATTAAGCAAATAAATATCCAACATACATGATGTAGTCAGCACGGACAAAGTACTGAGAT	CATTCTTTCATGATTTTTAAAGAAAAAGAAGAAAGAACTCAAAAAAAAAAAACATGAATCAATTTAATTAAGCAAATAAATATCCAACATACATGATGTA	cat6		N	CATTCTTT:-6.5,CTTTCATG:-5.2,CATGAT:-6.9,TGATTTTT:-8.7,TTTTAAAG:-5.4,AAAGAAAAAGA:-9.1,AAGAAGAAAGA:-6.4,AAGAACTCA:-7.3,CTCAAAAAAA:-5.2,AAAAAAAAACA:-5.8,AACATG:-6.7,CATGAATC:-5.1,AATCAATTT:-6.1,ATTTAATTA:-10.7,ATTAAGCA:-6.4,AGCAAATA:-5.1,AATAAATA:-12.5,AATATCCAACAT:-5.1,ACATACAT:-5.1,ACATGA:-9.9,ATGATGTA:-6.3	0	0	0	0	0	1	1	4	0	0	0	0	0	3
ATCGAAAGGATGGGAGTACTAAGCTAGATTTATTTAATCATCTATCCTAAAACTTAAAAAACAAAATTAAAAAAAATAAATCAGATAGGGTCAAATTAAACAATGGCCTTTCATTAGGATAGGTAGTCAGCACGGACAAAGTACTGAGAT	AGATTTATTTAATCATCTATCCTAAAACTTAAAAAACAAAATTAAAAAAAATAAATCAGATAGGGTCAAATTAAACAATGGCCTTTCATTAGGATAGGTA	cat6		N	AGATTTATTTA:-5.2,TTTAATC:-9.9,AATCAT:-12.5,TCATCTAT:-5.3,CTAT:-29.3,CTATCCTAAA:-6.8,TAAAACTT:-6.1,ACTTAAAA:-7.9,AAAAAACAAAA:-8.7,AAAATTAA:-12.8,TTAAAAAAAA:-6.9,AAAATAAAT:-7.6,AAATCAG:-13.7,TCAGATAGGG:-6.7,TCAAATT:-8.8,AATTAAAC:-7.1,AAACAATG:-6.3,AATGGCCT:-5.2,TTCATT:-24.2,CATTAG:-15.5,TTAGGATAG:-6.7,ATAGGTAAA:-8.1	92	0	0	1	0	16	0	8	1	2	115	283	11	5
ATCGAAAGGATGGGAGTACTAAGCTCTGATTTAGAAAATTCATAAAATGAAATCAAATAGCTATTGACGTTTTTTTTTGACTAATATCCACTTGTAATTACATCATTGATTAATATTTTGTTTTTGTCAGCACGGACAAAGTACTGAGAT	CTGATTTAGAAAATTCATAAAATGAAATCAAATAGCTATTGACGTTTTTTTTTGACTAATATCCACTTGTAATTACATCATTGATTAATATTTTGTTTTT	cat6		N	CTGATTTAG:-7.5,TTAGAAAAT:-8.8,AAATTCAT:-6.6,TCATAAAA:-5.8,AAAATGAAA:-5.9,GAAATCAA:-7.3,TCAAATA:-10.3,AATAGCT:-6.6,AGCTATT:-6.6,TATTGACG:-5.1,TTTTTTTTTGA:-5.3,TTGACT:-6.7,GACTAATATCCA:-6.7,TCCACTTG:-6.8,TAATTACA:-6.2,TACATCAT:-6.3,TCATTGATT:-5.3,GATTAATA:-6.1,AATATTTT:-8.0,TTTTGTTT:-9.7,GTTTTTTTTT:-8.5	70	0	4	2	103	192	71	144	70	48	1	3	173	193
ATCGAAAGGATGGGAGTACTAAGCTGATTAATGCATTAATTAATCATGAATAATTGGATATTAGTCCCCTATCTGATTAAAAATCAATAAATCAAATTAAATAGCTATTAGTCCACCTTCTTGTAGTCAGCACGGACAAAGTACTGAGAT	GATTAATGCATTAATTAATCATGAATAATTGGATATTAGTCCCCTATCTGATTAAAAATCAATAAATCAAATTAAATAGCTATTAGTCCACCTTCTTGTA	cat6		N	GATTAA:-24.3,TTAATGCA:-6.6,TGCATTA:-7.3,ATTAATTA:-16.4,ATTAATCAT:-6.4,TCATGAAT:-5.2,GAATAAT:-7.5,TAATTGG:-6.1,TTGGATATTAGT:-7.3,TAGTCCCCTA:-7.2,CCTATCTGAT:-7.6,TGATTAAAA:-5.8,AAAAATCAAT:-8.0,CAATAAATC:-7.7,AATCAAA:-10.4,CAAATTAA:-5.2,TTAAATA:-14.7,AATAGCT:-6.6,AGCTATT:-6.6,TATTAGTCC:-6.1,GTCCACCTTCTTG:-5.3,TAATGTG:-6.6	1092	0	6	1	12	307	62	549	217	170	1548	584	102	117
ATCGAAAGGATGGGAGTACTAAGCTTAAGATTTATTGATTTTTTTGAGATTAATAGATGATGGATGGATGATTGATTTAAGTCAATTAGAATTTAATAGCCGTCAATATCCAACAGAGAAAGAAAGTCAGCACGGACAAAGTACTGAGAT	TAAGATTTATTGATTTTTTTGAGATTAATAGATGATGGATGGATGATTGATTTAAGTCAATTAGAATTTAATAGCCGTCAATATCCAACAGAGAAAGAAA	cat6		N	TAAGAT:-6.2,AGATTTATT:-6.6,TATTGAT:-21.5,TGATTTTT:-8.7,TTTTTTGAGA:-6.1,GAGATTAA:-5.1,TTAATAG:-7.4,ATAGATGA:-5.3,ATGATGGATG:-5.9,GATGGATG:-6.1,GATGAT:-8.1,TGATTGAT:-10.4,TGATTTA:-35.4,TTTAAGT:-7.0,AAGTCAAT:-5.6,CAATTAG:-5.3,TTAGAAT:-7.3,GAATTTAAT:-6.4,TAATAGC:-7.0,CGTCAATA:-5.1,AATATCCAACA:-5.3,AACAGAGAA:-5.6,AGAAAGAAA:-16.8	595	50	97	168	107	271	66	53	301	275	411	238	23	25
ATCGAAAGGATGGGAGTACTAAGCTGCTACACAGAGGTCATTAGGGGCTTTTCTTTAAATTTAATAGATTAATTAATGAAATCAATGGATATTAGTCAATTACTGAGTTTGACTAATATTAGTCAGTCAGCACGGACAAAGTACTGAGAT	GCTACACAGAGGTCATTAGGGGCTTTTCTTTAAATTTAATAGATTAATTAATGAAATCAATGGATATTAGTCAATTACTGAGTTTGACTAATATTAGTCA	cat6		N	GCTACACAGAG:-6.4,AGAGGTCA:-5.9,GTCATTA:-6.2,ATTAGGGG:-5.1,CTTTTCTTT:-12.8,CTTTAAAT:-6.1,AAATTTAAT:-5.1,TAATAGAT:-8.5,AGATTAAT:-11.2,TAATTAATG:-5.1,AATGAAAT:-6.7,AAATCAATG:-10.4,AATGGA:-13.5,TGGATATTAGTC:-6.7,AGTCAA:-6.7,TCAATTACT:-5.6,TACTGA:-6.4,CTGAGTTTGA:-5.1,TTGACT:-6.7,GACTAATAT:-7.0,ATATTAGTC:-7.0,AGTCAA:-6.7	129	0	0	0	1	27	5	20	2	3	23	77	56	52
ATCGAAAGGATGGGAGTACTAAGCTTCTTTTCTTTTTTTTATTTTATCATTAGCACATTTAGGATACATCAGGAAATAAAATGATAAACAGAGAAAAAAAAAAAAACAAAAAAAAGACCAGTAATGTCAGCACGGACAAAGTACTGAGAT	TCTTTTCTTTTTTTTATTTTATCATTAGCACATTTAGGATACATCAGGAAATAAAATGATAAACAGAGAAAAAAAAAAAAACAAAAAAAAGACCAGTAAT	cat6		N	TCTTTTC:-6.4,TTTCTTTTTT:-25.9,TTTTTTAT:-9.7,TTATTTTAT:-7.2,TTATCAT:-7.3,TCATTAG:-6.7,TTAGCACA:-5.1,CACATTT:-6.2,ATTTAGGATA:-6.9,GATACA:-9.0,TACATCA:-7.3,ATCAGG:-5.7,CAGGAAATAA:-6.2,ATAAAATGA:-5.7,ATGATAA:-7.3,ATAAACA:-8.2,AACAGAGAA:-5.6,AGAAAAAAAA:-5.7,AAAAAAAAACA:-5.8,AACAAAAAAA:-5.1,AAAAAGACCA:-5.1,ACCAGTAA:-5.9,GTAATTAA:-5.6	0	0	0	0	1	2	0	0	0	0	0	0	0	0
ATCGAAAGGATGGGAGTACTAAGCTATGATAATTGATCTTTACCTATCCTAAAAAAACAAAAAAAAGAAAGAAAAAATCAAATAAACAAAGAAAGAATTCTTTACCTATCCTATCCTAAATTCATGTCAGCACGGACAAAGTACTGAGAT	ATGATAATTGATCTTTACCTATCCTAAAAAAACAAAAAAAAGAAAGAAAAAATCAAATAAACAAAGAAAGAATTCTTTACCTATCCTATCCTAAATTCAT	cat6		N	ATGATAA:-7.3,ATAATTG:-5.9,ATTGATCT:-5.4,ATCTTTACC:-7.1,TACCTATCCTAAA:-6.4,TAAAAAAA:-16.0,AAAACAAAAAA:-6.6,AAAAAAGAAA:-25.9,GAAAGAAAAA:-7.6,AAAAATCAA:-5.7,TCAAATAA:-7.4,ATAAACA:-8.2,AACAAAGAA:-6.7,AGAAAGAA:-17.9,AGAATTCTTT:-5.4,CTTTACCT:-7.2,ACCTATCCTA:-7.4,CCTATCCTAAAT:-7.4,AAATTCAT:-6.6	208	0	1	0	3	166	10	50	0	15	0	49	11	30
ATCGAAAGGATGGGAGTACTAAGCTTAAATAAATCTTTACCTAAATCAGATGTATTGATTGATTTAGGATAGGTAAAAAAAAAAAAAGAAAAAAGAAAGGAAGAAAGATTTATTGATCAATTAGAGTCAGCACGGACAAAGTACTGAGAT	TAAATAAATCTTTACCTAAATCAGATGTATTGATTGATTTAGGATAGGTAAAAAAAAAAAAAGAAAAAAGAAAGGAAGAAAGATTTATTGATCAATTAGA	cat6		N	TAAATAAATCT:-5.2,ATCTTTACCTA:-6.8,CCTAAATCAGAT:-6.8,AGATGTAT:-5.6,GTAT:-32.5,GTATTGAT:-5.9,TGATTGAT:-10.4,TGATTTAG:-11.3,TTAGGATAG:-6.7,ATAG:-29.3,ATAGGTAAA:-8.1,TAAAAAAAAA:-13.6,AAAAAAAAGA:-20.4,AAGAAAAAAGA:-5.7,AAGAAAGGA:-15.4,AGGAAGAAAG:-7.4,AAAGATTTAT:-5.5,TTATTGAT:-18.4,TGATCAAT:-7.6,CAATTAG:-5.3,TTAGAAT:-7.3	6	0	0	0	0	0	0	1	1	0	3	2	0	0
ATCGAAAGGATGGGAGTACTAAGCTTGTCTCAAATTAATTAAGACAAAAAGAAAAAGAATTGCATTTATCTTAATTAAGATCCTTTCCCCTATCTTTACCTAAATCAGATCCTTTCCCCTATCTCGTCAGCACGGACAAAGTACTGAGAT	TGTCTCAAATTAATTAAGACAAAAAGAAAAAGAATTGCATTTATCTTAATTAAGATCCTTTCCCCTATCTTTACCTAAATCAGATCCTTTCCCCTATCTC	cat6		N	TGTCTCAAA:-5.2,CAAATTAA:-5.2,TTAATTAAG:-5.1,TAAGACAAA:-5.1,CAAAAAGA:-5.4,AAGAAAAAG:-9.0,AAAGAATT:-6.5,AATTGCATT:-5.1,CATTTATCT:-6.1,ATCTTA:-6.2,CTTAATTAA:-5.1,TTAAGAT:-10.1,AGATCCTTTCCC:-6.1,TCCCCTATCT:-6.7,ATCTTTACCTA:-6.8,CCTAAATCAGAT:-6.8,AGATCCTTTCCC:-6.1,TCCCCTATCT:-6.7,ATCTCATT:-5.6	3220	295	1128	1571	920	1763	1208	1623	134	284	58	0	7	19
ATCGAAAGGATGGGAGTACTAAGCTCCTAAATAAATAGATAAATGAAATCAGGAAATAAATAAAGAACTCAACCAAGTGGAAATAATGACAGATGTCATTAAATTTCATAAAAAAACAAACTCATGTCAGCACGGACAAAGTACTGAGAT	CCTAAATAAATAGATAAATGAAATCAGGAAATAAATAAAGAACTCAACCAAGTGGAAATAATGACAGATGTCATTAAATTTCATAAAAAAACAAACTCAT	cat6		N	CCTAAAT:-8.5,AAATAAATA:-9.1,AATAGAT:-11.5,AGATAAATG:-6.1,AATGAAAT:-6.7,AAATCAGG:-5.7,CAGGAAATAA:-6.2,ATAA:-161.4,ATAAATAA:-6.9,ATAAAGAAC:-7.7,GAACTCAA:-7.4,TCAACCA:-5.6,ACCAAGTGGAA:-5.6,GGAAATAAT:-5.6,TAATGAC:-6.2,TGACAGATG:-5.2,GATGTCA:-7.2,GTCATTA:-6.2,ATTAAATT:-15.5,AATTTCAT:-7.0,TCATAAAA:-5.8,AAAAAAACAAA:-6.7,CAAACTCA:-5.7,CTCATC:-5.9	0	0	0	0	26	57	22	77	0	0	0	0	76	69
ATCGAAAGGATGGGAGTACTAAGCTTTAATTGCTTAATTGTAATTGAAATAATTCATTAATCTGTTGGATATTAGTCCCCTAATTAAACAAAGCCATAAATCTAATGTAATTTATTTAAATCAGAGTCAGCACGGACAAAGTACTGAGAT	TTAATTGCTTAATTGTAATTGAAATAATTCATTAATCTGTTGGATATTAGTCCCCTAATTAAACAAAGCCATAAATCTAATGTAATTTATTTAAATCAGA	cat6		N	TTAATTGC:-5.3,TTGCTTAA:-5.5,TTAATTGT:-6.6,TTGTAAT:-6.4,TAATTGAAA:-6.7,GAAATAA:-13.7,ATAATTCAT:-5.1,TCATTAATC:-5.3,AATCTGTTG:-7.6,GTTGGATATTAGT:-5.3,TAGTCCCCTA:-7.2,CCTAAT:-11.2,TAATTAAAC:-5.6,AAACAAAG:-7.4,AAAGCCAT:-8.6,CCATAAATC:-5.9,AATCTAAT:-5.9,TAATGT:-13.4,ATGTAAT:-7.0,TAATTTAT:-13.7,TTATTTAAA:-5.7,TAAATCAGA:-9.5	1	0	0	0	9	93	18	41	3	0	0	0	66	86
ATCGAAAGGATGGGAGTACTAAGCTAAATAACAAAGAATTCTTTTTTTTTGAAGTATTGATTTCTCTGTGTAGCTGAAAGAAAATTAAGATTTATTAGCACATGTATATGTAATGATGGATATTAGTCAGCACGGACAAAGTACTGAGAT	AAATAACAAAGAATTCTTTTTTTTTGAAGTATTGATTTCTCTGTGTAGCTGAAAGAAAATTAAGATTTATTAGCACATGTATATGTAATGATGGATATTA	cat6		N	AAATAAC:-6.2,TAACAA:-7.2,ACAAAGAATTC:-5.1,ATTCTTTT:-8.3,TTTTTTTTTGA:-5.3,TTGAAGT:-5.5,AAGTA:-11.3,AGTAT:-5.1,GTAT:-32.5,GTATTGAT:-5.9,TGATTTC:-8.9,TTTCTCTGT:-6.6,CTGTGTAGC:-7.8,TGAAA:-45.0,GAAAGAAAA:-12.3,AAAATTAA:-12.8,TTAAGAT:-10.1,AGATTTAT:-14.1,TTATTAG:-6.5,TTAGCACA:-5.1,CACATGT:-5.1,ATGTATA:-7.7,TATATGT:-9.3,ATGTAA:-15.3,GTAATGA:-8.7,ATGATGGA:-6.9,TGGATATTAGTC:-6.7	56	3	3	31	49	80	16	39	59	58	43	401	25	21
ATCGAAAGGATGGGAGTACTAAGCTTATGCAAATGAAAAATGAGTTCTTTATCATTTTTTTGAGAATTCTTTGAGACATGAATTCTCATTATGTAATTAATTTATCATTTAGAAAATCAATAATGGTCAGCACGGACAAAGTACTGAGAT	TATGCAAATGAAAAATGAGTTCTTTATCATTTTTTTGAGAATTCTTTGAGACATGAATTCTCATTATGTAATTAATTTATCATTTAGAAAATCAATAATG	cat6		N	TATGCA:-7.1,TGCAAA:-8.4,CAAATGA:-12.6,ATGAAAAAT:-6.6,AAATGAGTT:-5.1,AGTTCTTTA:-7.7,TTTATCAT:-7.1,TCATTTT:-9.3,TTTTTTTGAGA:-6.9,GAGAATTC:-5.4,ATTCTTTG:-10.6,TTTGAGACA:-5.2,GACATG:-6.4,CATGAAT:-6.4,GAATTCTC:-5.4,TCTCAT:-9.9,TCATTATG:-6.7,TATGTAA:-5.5,GTAATTA:-13.4,ATTAATTTA:-5.1,TTTATCAT:-7.1,TCATTTAG:-5.3,TTAGAAAAT:-8.8,AAATCAATAA:-5.9,ATAATGAA:-8.0	276	0	0	0	2	61	2	21	18	7	71	37	59	51
ATCGAAAGGATGGGAGTACTAAGCTTGTTATTGATTGATTAATAAATAGCAATAAAGAACTCAAGAAAAAAGAAAAGAAAGAAAAGAAAGAACTATTCATTTAATTAAACTTCATTACTTAATTAGTCAGCACGGACAAAGTACTGAGAT	TGTTATTGATTGATTAATAAATAGCAATAAAGAACTCAAGAAAAAAGAAAAGAAAGAAAAGAAAGAACTATTCATTTAATTAAACTTCATTACTTAATTA	cat6		N	TGTTAT:-6.6,TTATTGATTG:-5.3,ATTGATT:-47.8,GATTAATA:-6.1,AATAAATA:-12.5,AATAGCA:-5.5,AGCAATAA:-7.6,ATAAAGAAC:-7.7,GAACTCAAGA:-5.9,AAGAAAAAAG:-6.7,AAAGAAAAGAA:-15.5,AGAAAGAAAA:-9.1,AAAAGAAAGAA:-9.0,AGAACTATTC:-5.3,ATTCATT:-12.5,CATTTAATT:-6.7,AATTAAACT:-5.3,AACTTCA:-9.7,TTCATTA:-11.8,ATTACTTA:-7.4,CTTAATT:-17.8,AATTAAAAT:-6.0	108	0	0	0	1	59	1	12	24	2	105	285	25	44
ATCGAAAGGATGGGAGTACTAAGCTCAACAGATTGATTTAGGATAGGGGAAAGGATCTGATTTAGGATCTTTACCTATCCTAAATCAATTAAATAAATAAATCAATTTAGATATGTTGGATATTAGTCAGCACGGACAAAGTACTGAGAT	CAACAGATTGATTTAGGATAGGGGAAAGGATCTGATTTAGGATCTTTACCTATCCTAAATCAATTAAATAAATAAATCAATTTAGATATGTTGGATATTA	cat6		N	CAACAGATTG:-5.3,ATTGATTTA:-6.4,TTTAGGATA:-5.7,GATAGGGGA:-7.4,GGGAAAGGATCT:-6.1,ATCTGATTTAGGA:-6.8,AGGATCTTTACC:-7.7,TACCTA:-5.7,CCTATCCTAAAT:-7.4,AAATCAATT:-6.2,AATTAAAT:-19.6,AAATAAATAA:-8.1,ATAAATCA:-19.3,ATCAATTT:-9.6,ATTTAGA:-6.9,TAGATAT:-6.4,ATATGTTG:-5.4,GTTGGATATTAGT:-5.3	33	0	0	0	0	13	9	27	0	0	0	0	1	1
ATCGAAAGGATGGGAGTACTAAGCTTTTGATTTTCTTCCTTTCCTTTTTCTTTCTTTTTTTTCTTTCTTTGTTTTTTTGTTTAAGCAATAAATGATTTAGGATCTTTACCTCATCTATCTGATTAGTCAGCACGGACAAAGTACTGAGAT	TTTGATTTTCTTCCTTTCCTTTTTCTTTCTTTTTTTTCTTTCTTTGTTTTTTTGTTTAAGCAATAAATGATTTAGGATCTTTACCTCATCTATCTGATTA	cat6		N	TTTGATTTTC:-5.5,TTTCTTCCTT:-6.0,CCTTTCCTTT:-5.5,CTTTTTCTTT:-9.7,CTTTCTTTTTT:-11.9,TTTTTTCTTTC:-6.8,TTTCTTTGTT:-5.6,TGTTTTTTTGT:-5.6,TTGTTTAA:-8.7,TTAAGCAA:-5.5,GCAATAAA:-7.5,TAAATGAT:-5.9,TGATTTAGGAT:-6.9,GGATCTTTACCT:-7.0,ACCTCAT:-5.1,TCATCTAT:-5.3,CTATCTGAT:-8.2,TGATTAA:-16.7	568	27	69	107	659	1564	705	1235	48	103	82	121	28	23
ATCGAAAGGATGGGAGTACTAAGCTTTTTTAATGAATTAGAAAGAAAGAACTATTTTATTTGATTTATTAATGGAAAGAAAATCAATCAGATAGGGAATGTCAAGTATTGATTTATGTGATAAATGTCAGCACGGACAAAGTACTGAGAT	TTTTTAATGAATTAGAAAGAAAGAACTATTTTATTTGATTTATTAATGGAAAGAAAATCAATCAGATAGGGAATGTCAAGTATTGATTTATGTGATAAAT	cat6		N	TTTTTAATG:-6.3,AATGAATT:-8.4,AATTAGAA:-5.1,AGAAAGAAAGA:-11.8,AAGAACTATT:-6.8,TATTTTATT:-6.3,TATTTGAT:-6.9,TGATTTATT:-8.7,TATTAAT:-5.4,TAATGGAA:-5.4,GGAAAGAAAA:-5.8,AAAATCAA:-18.3,TCAATCAG:-5.6,TCAGATAGGG:-6.7,AATGTCAA:-5.2,TCAAGT:-5.4,AAGTA:-11.3,AGTAT:-5.1,GTATTGAT:-5.9,TGATTTAT:-19.3,TTATGTGA:-5.1,GTGATAAAT:-5.1	15	0	0	0	0	27	0	2	1	0	0	17	5	7
ATCGAAAGGATGGGAGTACTAAGCTTTTCTTTTTTAAGTAAATAAATCAATTTATTTATGTATTGATGGATATTAGTCCCCTATCTGATTTAATTAATTTCATAAATTGATTTAATGAGTTCTTTGTCAGCACGGACAAAGTACTGAGAT	TTTCTTTTTTAAGTAAATAAATCAATTTATTTATGTATTGATGGATATTAGTCCCCTATCTGATTTAATTAATTTCATAAATTGATTTAATGAGTTCTTT	cat6		N	TTTCTTTTTT:-25.9,TTTTAAGT:-7.9,AAGTAAA:-8.5,TAAATAA:-5.2,ATAAATCA:-19.3,ATCAATTT:-9.6,ATTTATTTAT:-8.1,TTATGTAT:-6.4,GTATTGAT:-5.9,TGATGGAT:-5.9,GGATATTAGT:-7.5,TAGTCCCCTA:-7.2,CCTATCTGAT:-7.6,TGATTTAA:-5.2,TTAATTAATT:-5.3,AATTTCATA:-5.2,CATAAATT:-9.0,AATTGATTT:-6.2,ATTTAATG:-7.4,AATGAGTT:-6.3,AGTTCTTT:-9.5	106	0	0	0	2	0	0	0	0	1	194	147	1	0
ATCGAAAGGATGGGAGTACTAAGCTAATTTATTGATTTTCTTTCTTTCTTTTTCACATAAAACCAAGTGGATATTAGTCAATATTAAAGAACTCAAGAAAAAAAAAAAACAGAGAAAAAGAAAGAGTCAGCACGGACAAAGTACTGAGAT	AATTTATTGATTTTCTTTCTTTCTTTTTCACATAAAACCAAGTGGATATTAGTCAATATTAAAGAACTCAAGAAAAAAAAAAAACAGAGAAAAAGAAAGA	cat6		N	AATTTATT:-9.5,TATTGATTTT:-5.6,TTTTCTTTC:-12.3,TTTCTTTCT:-16.8,TTCTTTTTC:-5.3,TTTCACAT:-5.4,ACATAAAACC:-5.8,AACCAAGTGGA:-6.1,TGGATATTAGTC:-6.7,AGTCAA:-6.7,TCAATATT:-5.3,TATTAAA:-9.5,TAAAGAAC:-8.9,GAACTCAAGA:-5.9,AAGAAAAAAA:-8.7,AAAAAAAAACA:-5.8,AACAGAGAA:-5.6,AGAAAAAGAA:-6.6,AGAAAGAA:-17.9	0	0	0	0	1	0	1	0	0	0	0	0	1	1
ATCGAAAGGATGGGAGTACTAAGCTAAAAACAAAAAAACAAATAAAAAATGAAAAGAAAAAGATCTTAAAAAAGAAAGAAAAAAAAAAAACAAAAAATGGGAAAGGATCTTTTTTCTTTTTCTTTGTCAGCACGGACAAAGTACTGAGAT	AAAAACAAAAAAACAAATAAAAAATGAAAAGAAAAAGATCTTAAAAAAGAAAGAAAAAAAAAAAACAAAAAATGGGAAAGGATCTTTTTTCTTTTTCTTT	cat6		N	AAAAACAAAAA:-7.9,AAAAAACAAA:-7.8,CAAATAA:-11.2,ATAAAAAA:-9.7,AAAATGAAAA:-5.7,AAAAGAAAAAG:-7.1,AAAGATC:-8.7,GATCTT:-6.2,TCTTAAAA:-5.6,AAAAAAGAAA:-25.9,GAAAGAAAAA:-7.6,AAAAAAAAAA:-22.0,AAAAACAAAAA:-7.9,AAAAATGGG:-6.0,TGGGAAAGGATCTTT:-6.9,CTTTTTTCTT:-6.7,TCTTTTTCTT:-7.1,TCTTTATATA:-5.3	4	0	0	0	0	0	0	0	0	0	0	0	0	0
ATCGAAAGGATGGGAGTACTAAGCTATAAATAACACATTAGCCTCATTAATTTTAAGAAAAAGAGATTTAGGTAAAGATCCTAAATCAATCAATCAAATAATCAATTTACCTATCCTAAATCAATGTCAGCACGGACAAAGTACTGAGAT	ATAAATAACACATTAGCCTCATTAATTTTAAGAAAAAGAGATTTAGGTAAAGATCCTAAATCAATCAATCAAATAATCAATTTACCTATCCTAAATCAAT	cat6		N	ATAAATAA:-6.9,ATAACACA:-7.2,CACATTA:-6.6,ATTAGC:-7.9,CTCATTA:-12.3,ATTAATTTT:-5.2,TTTTAAGA:-5.6,AAGAAAAAG:-9.0,AAAGAGATT:-5.9,GATTTAGG:-7.9,TAGGTAAAGATCCT:-7.2,TCCTAAATC:-7.2,AATCAAT:-47.8,CAATCAATCA:-5.3,ATCAAATAA:-5.5,ATAATCAA:-6.4,TCAATTTA:-6.9,TTTACC:-5.3,TACCTA:-5.7,CCTATCCTAAATC:-7.4,AATCAATAT:-7.2	14	1	11	24	109	422	179	159	11	0	0	0	0	9
ATCGAAAGGATGGGAGTACTAAGCTTCATTAAGATAAAAAATCAATTAGTCCCCTATCTGATGGATGAAATCAAATAGCTATTTATTTTAATTAAAAAAGAAGGTGGACTAATAACCCGATCCTTGTCAGCACGGACAAAGTACTGAGAT	TCATTAAGATAAAAAATCAATTAGTCCCCTATCTGATGGATGAAATCAAATAGCTATTTATTTTAATTAAAAAAGAAGGTGGACTAATAACCCGATCCTT	cat6		N	TCATTAAG:-5.1,TAAGATAA:-5.5,ATAAAAAA:-9.7,AAAATCAATT:-5.3,AATTAGT:-5.5,TAGTCCCCTA:-7.2,CCTATCTGAT:-7.6,TGATGGATG:-10.4,GATGAA:-10.3,TGAAATCA:-6.5,ATCAAATA:-6.9,AATAGCT:-6.6,AGCTATT:-6.6,TATTTATT:-12.5,TATTTTAA:-5.4,TTAATTAAA:-11.7,TAAAAAAGAA:-6.9,AGAAGGTGGAC:-5.4,GGACTAATA:-6.1,AATAACCC:-5.1,GATCCTTT:-5.7	47	0	0	0	1	18	18	34	4	0	0	0	1	0
ATCGAAAGGATGGGAGTACTAAGCTTCATTAACAAAAAAACAAAGAAAGGATAGGTAAAAAAAAAAAGAAAGAAGAAGTTCCTTGATTATTTCCTTCTTTCTTTTTTATTTTATTACATCAATCAGTCAGCACGGACAAAGTACTGAGAT	TCATTAACAAAAAAACAAAGAAAGGATAGGTAAAAAAAAAAAGAAAGAAGAAGTTCCTTGATTATTTCCTTCTTTCTTTTTTATTTTATTACATCAATCA	cat6		N	TCATTAAC:-7.4,TAACAA:-7.2,ACAAAAAAACA:-5.6,AACAAAGA:-8.8,AAGAAAGGA:-15.4,AGGATAGGTAAA:-7.4,TAAAAAAAAA:-13.6,AAAAAAGAAAG:-11.9,AAAGAAGAAG:-6.4,GAAGTTCCTTGA:-5.4,TTGATTATTTCCT:-5.2,TCCTTCTTTCT:-5.1,TTCTTTTTTA:-6.9,TTTATTTTAT:-6.1,TTATTACA:-5.7,TACATCA:-7.3,ATCAATCAA:-7.7	16	0	5	4	3	29	5	32	77	50	277	181	76	105
ATCGAAAGGATGGGAGTACTAAGCTAATCAATGAATGAAAGAAAGGATCTTAAGCAATAAATTACCTTCTTGATTTACAAAAAAAAAAAGAAAGAAGGAACTTCACATAAATCAGATAGGTAAAGGTCAGCACGGACAAAGTACTGAGAT	AATCAATGAATGAAAGAAAGGATCTTAAGCAATAAATTACCTTCTTGATTTACAAAAAAAAAAAGAAAGAAGGAACTTCACATAAATCAGATAGGTAAAG	cat6		N	AATCAATGA:-5.3,ATGAATG:-5.5,AATGAAA:-10.0,GAAAGAAAG:-10.9,AAAGGATCT:-6.4,ATCTTAA:-10.1,TTAAGCAA:-5.5,GCAATAAA:-7.5,TAAATTAC:-6.4,TTACCT:-5.7,ACCTTCTTGA:-5.7,TTGATTTA:-9.3,TTTACAA:-6.7,ACAAAAAA:-8.4,AAAAAAAAAGA:-18.6,AAGAAAGAAGG:-6.4,AAGGAACTTCACATAA:-5.6,ATAAATCAG:-6.4,TCAGATAG:-7.0,ATAGGTAA:-7.2,GTAAAGATCC:-7.2	10	3	23	0	71	85	54	126	8	0	0	18	6	15
ATCGAAAGGATGGGAGTACTAAGCTACAGAAGACCACACCTAGGGTGTGGCCTTGTTGGAGGCCAGAATGGAGCCAGCCTTGTTGGAGCCTTCCTCCCTAGGGTGTGGCCTTGCTTTGTCTATTGGTCAGCACGGACAAAGTACTGAGAT	ACAGAAGACCACACCTAGGGTGTGGCCTTGTTGGAGGCCAGAATGGAGCCAGCCTTGTTGGAGCCTTCCTCCCTAGGGTGTGGCCTTGCTTTGTCTATTG	cat7	KMAC-designed opening ESC	Y	ACAGAAGA:-5.8,AAGACCACACCT:-6.0,ACCTAGGGT:-9.5,GGGTGTGGCCTTG:-7.0,CTTGTTGGAGG:-9.7,GAGGCCAGAA:-16.0,AGAATGGA:-9.7,TGGAGCCAGCCT:-5.2,GCCTTGTTGGAG:-11.8,GGAGCCTTCC:-5.1,TTCCTCCCTA:-5.2,CCTAGGGTG:-5.4,GGTGTGGCCTTGCT:-5.8,TGCTTTGTC:-6.8,TGTCTATTGTC:-8.1	1076	919	1816	2378	1777	2110	3300	4570	4705	4789	2996	1339	4657	5824
ATCGAAAGGATGGGAGTACTAAGCTACTCCAACAAAACAACAAAACAAATTGTTGGAGGAGCTGGAGTCAGCACTGAGACCACACCTGCTTGTTTGGGTGTGGTCTTGTTCAGCCAGAAGAGGCCGTCAGCACGGACAAAGTACTGAGAT	ACTCCAACAAAACAACAAAACAAATTGTTGGAGGAGCTGGAGTCAGCACTGAGACCACACCTGCTTGTTTGGGTGTGGTCTTGTTCAGCCAGAAGAGGCC	cat7	KMAC-designed opening ESC	Y	ACTCCAAC:-6.4,CAACAAAACA:-7.1,AACAACAAAACAAA:-5.8,CAAATTGT:-9.1,TTGTTGGAGGAG:-5.9,GGAGCTGGAGT:-6.5,GAGTCAGCACT:-5.2,CACTGAGAC:-9.2,AGACCACACCT:-5.6,ACCTGCTTG:-8.7,CTTGTTTGGGTG:-6.0,GGTGTGGTCTTGTT:-5.5,TGTTCAGCCA:-6.0,GCCAGAAGAGG:-29.8,GAGGCCAGAA:-16.0	962	554	1553	914	1333	1103	1291	1757	3141	1925	1895	1281	3449	3605
ATCGAAAGGATGGGAGTACTAAGCTCAAGGCCACACCCTAGGTGTGGCTTCTTATTCAAACAAAAACAAGGGAATAAAGTAGTCTATTGTTTGGGTGGCTCAGTGGGTGTGGCCTTGTTTTTCACGTCAGCACGGACAAAGTACTGAGAT	CAAGGCCACACCCTAGGTGTGGCTTCTTATTCAAACAAAAACAAGGGAATAAAGTAGTCTATTGTTTGGGTGGCTCAGTGGGTGTGGCCTTGTTTTTCAC	cat7	KMAC-designed opening ESC	Y	CAAGGCCACACCC:-7.0,ACCCTAGGTG:-5.8,GGTGTGGC:-14.0,TGGCTTCT:-6.9,TTCTTATT:-6.6,TATTC:-26.5,ATTCAAAC:-12.7,AAACAAAAAC:-6.1,AAACAAGGGA:-7.6,GGGAATA:-8.7,AATAAAGT:-5.1,AAGTAGT:-5.5,TAGTCTATTGTT:-7.8,TGTTTGGGTG:-8.0,GGTGGCTCA:-5.2,CTCAGTGGG:-12.9,TGGGTGT:-5.2,GTGTGGCCTTGT:-14.2,TTGTTTTTCA:-6.8,TTCACAG:-5.4	552	392	556	894	522	600	693	1073	2240	1994	1193	1195	1605	1887
ATCGAAAGGATGGGAGTACTAAGCTTCTATTGTTCTGCAGGTGAAGAAACCTGTCTCAGTGGCCTTGCTGACTCATTAGAATAAAGTACCTGCTGAGAGGGCATCAGAACAATAGACAGAACAATGTCAGCACGGACAAAGTACTGAGAT	TCTATTGTTCTGCAGGTGAAGAAACCTGTCTCAGTGGCCTTGCTGACTCATTAGAATAAAGTACCTGCTGAGAGGGCATCAGAACAATAGACAGAACAAT	cat7	KMAC-designed opening ESC	Y	TCTATTGTTCTGC:-5.2,CTGCAGGTGA:-7.0,GTGAAGAAACC:-5.1,AACCTGTC:-6.0,TGTCTCAGTGG:-5.9,GTGGCCTTGCT:-6.5,TGCTGACTCAT:-5.2,TCATTA:-5.1,ATTAGA:-7.2,TAGAAT:-5.2,GAATAAAGTACC:-6.0,TACCTGCTG:-23.9,GCTGAGAGG:-10.1,GAGGGCATCAGA:-6.2,CAGAACAATAGA:-9.6,TAGACA:-6.7,GACAGAACAATA:-6.7	423	301	178	869	546	538	595	821	1874	1700	1510	2821	1038	1390
ATCGAAAGGATGGGAGTACTAAGCTACATGCAGGTATTTAAATAGACAGAGGCCAGAACAATAGAGTGATGCTAATTCAAACCTGTCACCTGCAGCTGAGAGGCCAGAACAATAGACTCATTAGAGTCAGCACGGACAAAGTACTGAGAT	ACATGCAGGTATTTAAATAGACAGAGGCCAGAACAATAGAGTGATGCTAATTCAAACCTGTCACCTGCAGCTGAGAGGCCAGAACAATAGACTCATTAGA	cat7	KMAC-designed opening ESC	Y	ACATGCAG:-10.5,GCAGGTA:-25.7,GGTATTT:-10.3,ATTTAAA:-9.6,TAAATAG:-8.7,ATAGACAGA:-9.6,CAGAGGCCAGAA:-7.9,AGAACAATAGA:-10.9,TAGAGTGAT:-5.9,TGATGCTAATT:-7.6,AATTCAA:-7.0,TCAAAC:-5.3,AAACCTGT:-8.7,CTGTCACCTGC:-5.1,CTGCAGCTG:-5.8,GCTGAGAGG:-10.1,GAGGCCAGA:-16.3,CAGAACAATA:-14.2,AATAGACT:-6.8,GACTCATT:-7.8,CATTAGA:-6.3	344	207	406	1101	570	639	462	846	1420	1322	2000	2383	1889	1797
ATCGAAAGGATGGGAGTACTAAGCTTGTAAATGCCCCCTGCATGCATTTATTTAACAATAGATGGCTGAACAATTGAATGAGTGGGTGTATTAGAACAATAAAGCCCACCTAGGGTGGAGCCTTGGTCAGCACGGACAAAGTACTGAGAT	TGTAAATGCCCCCTGCATGCATTTATTTAACAATAGATGGCTGAACAATTGAATGAGTGGGTGTATTAGAACAATAAAGCCCACCTAGGGTGGAGCCTTG	cat7	KMAC-designed opening ESC	Y	TGTAAAT:-7.9,AAATGCC:-6.6,TGCCCCCTGC:-5.5,CTGCATGCAT:-6.1,GCATTTA:-8.0,TTTATTTA:-5.2,TTTAACAATAGA:-7.7,TAGATGGCT:-6.5,GGCTGAACAAT:-5.5,CAATTGAAT:-5.5,GAATGA:-6.9,ATGAGT:-6.3,GAGTGGGTGT:-6.9,GTGTATT:-6.5,TATTAGAA:-6.1,AGAACAATA:-17.2,AATAA:-10.8,ATAAAG:-7.2,AAAGCCCACC:-5.2,CACCTAGGGTG:-5.5,GGTGGAGCCTT:-6.4,CCTTGTTTGGG:-7.3	193	88	292	457	254	402	624	689	1121	588	1555	1066	1306	1517
ATCGAAAGGATGGGAGTACTAAGCTGGTGACAGAACCCCTGCTACCTGCTCTTAACTGAATTAGCAGGAAGCAGGTTAGAGAAGAGGGCACTGCATCAGATGGCTCAGTTGCAAAGCCCACACCTGTCAGCACGGACAAAGTACTGAGAT	GGTGACAGAACCCCTGCTACCTGCTCTTAACTGAATTAGCAGGAAGCAGGTTAGAGAAGAGGGCACTGCATCAGATGGCTCAGTTGCAAAGCCCACACCT	cat7	KMAC-designed opening ESC	Y	GGTGACAGAAC:-5.3,GAACCCCT:-5.4,CCCTGCT:-10.2,TGCTACCTGCT:-19.0,TGCTCTTAAC:-6.0,TAACT:-29.9,AACTGAAT:-7.2,GAATT:-7.2,AATTAGCA:-22.0,AGCAGGAAG:-8.0,GAAGCAGGT:-6.0,AGGTTAGA:-5.1,TAGAGAAGA:-5.1,AAGAGGGCA:-20.7,GGCACTGCAT:-6.0,GCATCAGAT:-7.4,AGATGGCTCAG:-6.5,TCAGTTGCAAA:-5.2,CAAAGCCCAC:-5.8,CCACACCTA:-6.0	1622	1035	1149	918	2435	2361	936	1157	1040	968	1211	1292	1058	1193
ATCGAAAGGATGGGAGTACTAAGCTCTCAGTGGGAAGTCTATTCAATTCATATGGAACTGGAACCAGCTTGCTGAGAGGCTGGCTCCAGTTCCAGTTCCAGAGGATTAAAGTACCTGGCTGTCTAGTCAGCACGGACAAAGTACTGAGAT	CTCAGTGGGAAGTCTATTCAATTCATATGGAACTGGAACCAGCTTGCTGAGAGGCTGGCTCCAGTTCCAGTTCCAGAGGATTAAAGTACCTGGCTGTCTA	cat7	KMAC-designed opening ESC	Y	CTCAGTGGGA:-10.2,GGGAAGTCTA:-5.5,TCTATT:-24.6,TATTCAA:-9.8,TCAATTCA:-14.6,TTCATAT:-5.4,ATATGGA:-6.9,TGGAACTGG:-8.9,CTGGAACCAGCT:-6.5,AGCTTGCT:-5.7,TGCTGAGAGGC:-13.6,AGGCTGGCTCCA:-5.2,TCCAGTTCCA:-8.7,TCCAGTTCCA:-8.7,TCCAGAGGA:-6.0,AGGATTAAA:-5.2,TAAA:-38.5,TAAA:-38.5,TAAAGTACC:-8.1,TACCTG:-33.1,CCTGGCTGT:-5.8,CTGTCTATTGTC:-7.3	46	35	32	401	1205	1138	743	1161	834	614	440	364	3493	4454
ATCGAAAGGATGGGAGTACTAAGCTCACCTAGGGTGTGGCCTCTCAGCAAGTAGTAGACTTAGATGGCTCAGTGGCAGCAGTGCCCTCTTCTGGCCTCCAACAAGGCCACACCCAGGTGGTGGGTGTCAGCACGGACAAAGTACTGAGAT	CACCTAGGGTGTGGCCTCTCAGCAAGTAGTAGACTTAGATGGCTCAGTGGCAGCAGTGCCCTCTTCTGGCCTCCAACAAGGCCACACCCAGGTGGTGGGT	cat7	KMAC-designed opening ESC	Y	CACCTAGGGT:-5.8,GGGTGTGGCCT:-6.9,GCCTCTCAGCA:-13.6,AGCAAGT:-8.3,AAGTAGT:-5.5,TAGTAGA:-6.0,TAGACT:-8.4,GACTTAGA:-5.4,TAGATGGCT:-6.5,GGCTCAGT:-10.1,CAGTGGCAGCA:-6.3,AGCAGTG:-8.9,AGTGCCCTCT:-8.4,CTCTTCTGGCCTC:-15.1,CCTCCAACAAG:-9.7,CAAGGCCACACCCA:-5.8,CCCAGGTGG:-6.4,GTGGTGGGT:-5.1	2071	1579	2428	2382	3202	3314	2511	3174	4881	3584	3911	2195	4619	5375
ATCGAAAGGATGGGAGTACTAAGCTTGCATGTATTTGCATGTATGCTATTCAAATGCAAATTGTTGGAGGGCACCAGCAGTGGAGCCTTCCTGCTAATGAGTCAGCACTCAGTGGGTGTGGTCTTGTCAGCACGGACAAAGTACTGAGAT	TGCATGTATTTGCATGTATGCTATTCAAATGCAAATTGTTGGAGGGCACCAGCAGTGGAGCCTTCCTGCTAATGAGTCAGCACTCAGTGGGTGTGGTCTT	cat7	KMAC-designed opening ESC	Y	TGCATGTAT:-5.2,GTATTT:-17.2,ATTTGCAT:-7.6,GCATG:-15.7,CATGTATG:-6.3,TATGCTATTC:-6.3,ATTCAAATG:-10.5,AATGCAAATTGT:-6.3,TTGTTGGAGG:-10.2,GAGGGCACCAG:-6.3,CCAGCAGTGG:-5.4,GTGGAGCCTTC:-7.7,CTTCCTGCT:-8.0,TGCTAATG:-5.3,AATGAGTCAGC:-5.2,CAGCACTCAG:-6.7,TCAGTGG:-16.9,GTGGGTGTG:-6.3,TGTGGTCTTGTTG:-5.5	560	425	1384	1783	1254	1072	1538	2085	6572	5536	7025	6084	5606	6887
ATCGAAAGGATGGGAGTACTAAGCTCTATTGTTCTGTCAATTCAAATGCAAGGCCACACAGTGTCTGAGAATAAAGTACTGCATGCTATTCCTTTGTTCAGCCATTGTGTCTTGTTGGAGTCAGCGTCAGCACGGACAAAGTACTGAGAT	CTATTGTTCTGTCAATTCAAATGCAAGGCCACACAGTGTCTGAGAATAAAGTACTGCATGCTATTCCTTTGTTCAGCCATTGTGTCTTGTTGGAGTCAGC	cat7	KMAC-designed opening ESC	Y	CTATTG:-17.2,ATTGTTCTGT:-8.7,CTGTCAATT:-10.5,AATTC:-7.2,ATTCA:-41.0,TTCAAATGCAA:-6.3,GCAAGGCCACAC:-5.8,ACACAGT:-7.6,CAGTGTC:-6.1,TGTCTGAGAA:-5.1,AGAAT:-17.4,GAATAAAGTAC:-6.5,GTACTGCATGC:-6.3,ATGCTATTCCT:-6.8,TCCTTTGTT:-8.4,TGTTCAGCCA:-6.0,GCCATTGTGT:-5.8,GTGTCTTG:-6.8,CTTGTTGGAGT:-5.8,GAGTCAGCA:-6.3	511	416	353	1133	641	716	476	874	1940	1706	2345	2431	1791	1753
ATCGAAAGGATGGGAGTACTAAGCTAGCCTGTAGGGAGGAATAGCAAGCAGGCTGCTACCTGCTGGCAACAAAAACAAAATACATGCAGTGCTGACTCTATTGTTCAGCCTGCTTCAAATGCTAAGTCAGCACGGACAAAGTACTGAGAT	AGCCTGTAGGGAGGAATAGCAAGCAGGCTGCTACCTGCTGGCAACAAAAACAAAATACATGCAGTGCTGACTCTATTGTTCAGCCTGCTTCAAATGCTAA	cat7	KMAC-designed opening ESC	Y	AGCCTGTAGG:-5.2,TAGGGAGGAA:-5.2,GGAATAGCA:-6.1,AGCAAGCA:-6.8,AGCAGGCTG:-7.2,GCTGCTACCT:-5.5,ACCTGC:-27.8,CTGCTGG:-8.1,CTGGCAACA:-5.6,AACAAAAACAAA:-6.9,CAAAATAC:-6.5,ATACATGCA:-5.2,TGCAGTGC:-14.0,GTGCTGACTC:-5.8,ACTCTATTG:-8.9,ATTGTTCAGCC:-5.5,AGCCTGCTTCA:-6.5,TTCAAATG:-7.9,AATGCTAAA:-7.0	824	813	652	547	1070	1188	1091	837	1929	1679	1316	1638	2504	2250
ATCGAAAGGATGGGAGTACTAAGCTATCTGTGGCCTTGCTGGCTTGAAAGACAAATAAATGCAGTGCCACTGAGTGCTGCAGGTGTAGTCTATTGTTCTGTCTCAGTGGGAATACCTGCTTCACAGTCAGCACGGACAAAGTACTGAGAT	ATCTGTGGCCTTGCTGGCTTGAAAGACAAATAAATGCAGTGCCACTGAGTGCTGCAGGTGTAGTCTATTGTTCTGTCTCAGTGGGAATACCTGCTTCACA	cat7	KMAC-designed opening ESC	Y	ATCTGTG:-7.3,TGTGGCCTTGCTG:-5.8,GCTGGCTT:-5.2,GCTTGAAA:-5.5,GAAAGACAAA:-5.1,CAAATA:-6.8,AATAAA:-7.2,TAAATGC:-8.0,ATGCAGTGCC:-6.0,TGCCACTGAG:-7.4,TGAGTGCTG:-6.5,GCTGCAGGTG:-7.1,GGTGTAGTCT:-5.5,GTCTAT:-12.5,CTATTGTTCTGT:-6.0,CTGTCTCAGT:-6.5,CAGTGGGA:-8.5,GGGAATA:-8.7,AATACCTG:-10.0,CCTGCTTCA:-7.3,TTCACAGG:-5.4	1517	1106	1404	1501	1711	2005	1770	2554	4554	3115	4969	3367	2271	2757
ATCGAAAGGATGGGAGTACTAAGCTAAGCAGGTGATGCTAATTTGCAACTGAGAGGCCAGCAGGTAGGTGTGGCCTTGTTGGAGTCAGCAGGAAGCAGGTGGGTTTAAACCCCTGGTGGCCTTGTGTCAGCACGGACAAAGTACTGAGAT	AAGCAGGTGATGCTAATTTGCAACTGAGAGGCCAGCAGGTAGGTGTGGCCTTGTTGGAGTCAGCAGGAAGCAGGTGGGTTTAAACCCCTGGTGGCCTTGT	cat7	KMAC-designed opening ESC	Y	AAGCAGGT:-12.0,AGGTGAT:-6.5,TGATGCTAAT:-6.8,TAATTTGCAAC:-5.2,CAACTGA:-8.3,CTGAGAGG:-10.2,GAGGCCAG:-10.2,CCAGCAGGTAG:-5.2,GTAGGTGTGGC:-5.5,TGGCCTTGTTG:-14.6,GTTGGAGT:-6.4,GAGTCAGCA:-6.3,AGCAGGA:-7.9,AGGAAGCAG:-5.8,GCAGGTGG:-6.8,GTGGGTTTAA:-6.9,TTAAACCC:-5.3,ACCCCTGGTGG:-8.7,GTGGCCTTGTTG:-13.1	677	450	636	1206	1035	1129	2435	2316	4976	4314	1817	3515	4482	4645
ATCGAAAGGATGGGAGTACTAAGCTCTAATGCTGAGAGGCCAGAAGAGGGCAGAACAATAGAAACCTGCTTGCTTCCTGCTTTGCAACTGAAGCAGGCTGAACAATGGCCTATTCAAATGCAAGTGTCAGCACGGACAAAGTACTGAGAT	CTAATGCTGAGAGGCCAGAAGAGGGCAGAACAATAGAAACCTGCTTGCTTCCTGCTTTGCAACTGAAGCAGGCTGAACAATGGCCTATTCAAATGCAAGT	cat7	KMAC-designed opening ESC	Y	CTAATGCT:-6.1,TGCTGAGAG:-16.1,AGAGGCCAGAAG:-11.5,GAAGAGGGCA:-20.7,GGCAGAACAA:-7.4,ACAATAGA:-35.8,TAGAAA:-9.2,GAAACCT:-11.6,ACCTGCTTG:-8.7,CTTGCTTC:-5.8,CTTCCTGCT:-8.0,TGCTTTGCA:-5.9,TGCAACTGAA:-6.3,TGAAGCAGGCT:-6.5,GGCTGAACAAT:-5.5,CAATGGCCTA:-9.3,CCTATT:-10.4,TATTCAA:-9.8,TCAAATGCAA:-6.5,GCAAGTTG:-7.4	289	191	516	339	343	293	792	1032	2767	2528	2242	2451	2567	2654
ATCGAAAGGATGGGAGTACTAAGCTCTGCTACCTCCTAATGCTAATGCTGTGTGTGGCCTTTGTTTAACAATTTGTTTTGTACTGCATGCAGTACCTGGAGAGATGGTTGTGAATAGAGGGCATGGTCAGCACGGACAAAGTACTGAGAT	CTGCTACCTCCTAATGCTAATGCTGTGTGTGGCCTTTGTTTAACAATTTGTTTTGTACTGCATGCAGTACCTGGAGAGATGGTTGTGAATAGAGGGCATG	cat7	KMAC-designed opening ESC	Y	CTGCTACCT:-19.1,ACCTCCTAA:-6.5,CTAATGCT:-6.1,TGCTAA:-29.3,CTAATGCT:-6.1,TGCTGTG:-16.6,TGTGTGTG:-6.7,TGTGGCCTT:-17.8,CCTTTGTTT:-7.9,GTTTAACAAT:-8.0,CAATTTGTTTT:-5.5,TTTTGTAC:-7.3,GTACTGCAT:-12.1,GCATGCAGTA:-7.0,AGTACCTGG:-9.7,CTGGAGAGATG:-7.6,GATGGTTGTGA:-5.6,GTGAATA:-6.2,AATAGAG:-15.3,AGAGGGCAT:-9.9,GCATGCAGTG:-7.6	668	469	334	501	1608	1826	1466	1810	1380	1098	823	1003	2260	2323
ATCGAAAGGATGGGAGTACTAAGCTCCACACCCACAGGTTTCTGACCTGTAAAGCTCAGCAGGTACTGCATGCAGCTGGAGAGATGGCTCATTTGAATTAGCAGGTACTGCATTTGAATAAAGTAGTCAGCACGGACAAAGTACTGAGAT	CCACACCCACAGGTTTCTGACCTGTAAAGCTCAGCAGGTACTGCATGCAGCTGGAGAGATGGCTCATTTGAATTAGCAGGTACTGCATTTGAATAAAGTA	cat7	KMAC-designed opening ESC	Y	CCACACCC:-5.1,ACCCACAG:-6.6,ACAGGTTTCT:-5.5,TTCTGACCT:-5.2,ACCTGTA:-5.7,TGTAAAGCT:-5.5,AGCTCAGCAGG:-5.4,CAGGTACT:-10.9,TACTGCATGCA:-5.3,TGCAGCTGG:-7.1,CTGGAGAGAT:-9.7,AGATGGCTCA:-6.9,CTCATT:-8.7,CATTTGAAT:-10.5,GAATT:-7.2,AATTAG:-12.5,TTAGCA:-29.3,AGCAGGTA:-27.2,GGTACTGCAT:-10.2,GCATTTGAAT:-7.8,GAATAAAGTACC:-6.0	536	262	828	509	1496	1423	2772	2798	1785	1166	451	1062	3912	3778
ATCGAAAGGATGGGAGTACTAAGCTACTACTTGCTTCCTGCTTCCCAGGTGGTCTTGTTGGAGTGGCTCAGTGCTGACTAGCATGTCTCAGGGGTGGGTGTGGCCTTGTTTGGGCACTGCAGTGCGTCAGCACGGACAAAGTACTGAGAT	ACTACTTGCTTCCTGCTTCCCAGGTGGTCTTGTTGGAGTGGCTCAGTGCTGACTAGCATGTCTCAGGGGTGGGTGTGGCCTTGTTTGGGCACTGCAGTGC	cat7	KMAC-designed opening ESC	Y	ACTACTT:-5.5,ACTTGCTTC:-6.8,CTTCCTGCT:-8.0,TGCTTCCCA:-5.1,CCCAGGTGG:-6.4,GTGGTCTTGTTG:-6.0,GTTGGAGTGG:-5.5,GTGGCTCA:-8.2,CTCAGTG:-14.1,AGTGCTGACT:-5.8,GACTAGCAT:-5.4,GCATGTCT:-6.4,GTCTCAGG:-5.2,CAGGGGTGG:-5.4,GTGGGTGTGGC:-5.5,TGGCCTTG:-13.8,CTTGTTTGGG:-7.2,TGGGCACTGCA:-6.5,TGCAGTGCCC:-6.8	832	1337	1132	1813	2276	1736	2141	2453	2891	3299	2232	3508	1794	1850
ATCGAAAGGATGGGAGTACTAAGCTTTTTTGTTTTGTAATGCTAATTAGCATCACTCTATTGTTCAAATGCAAATTGTTTTTCAAATTAGCATTATGCTATTCAGTTCAAACAACAAATGAGTCAGTCAGCACGGACAAAGTACTGAGAT	TTTTTGTTTTGTAATGCTAATTAGCATCACTCTATTGTTCAAATGCAAATTGTTTTTCAAATTAGCATTATGCTATTCAGTTCAAACAACAAATGAGTCA	cat7	KMAC-designed opening ESC	Y	TTTTTGTTTTGT:-5.4,TTGTAATGC:-6.5,ATGCTAATT:-11.8,AATTAGCATCA:-7.6,ATCACTCTA:-5.9,TCTATTGTTCA:-5.5,TTCAAATG:-7.9,AATGCAAATTGT:-6.3,TTGTTTTTCA:-6.8,TTCAAATT:-6.0,AATTAGCATTA:-5.5,ATTATGCTAT:-7.1,CTATTC:-18.6,ATTCAGTT:-7.2,AGTTCAA:-7.4,TCAAACAACAAA:-5.2,CAAATGA:-11.7,ATGAGTCAG:-5.3	193	69	111	400	259	369	169	224	698	569	635	1725	621	822
ATCGAAAGGATGGGAGTACTAAGCTATGTGTGTGGCCTTGCTGTGGCCTTGTTTGGGTACTGCATGCATTTGAATTAGCATCCTTTGTTTTTGTTTCAGCAGGTACTGCATGCAAATTATGCTATGTCAGCACGGACAAAGTACTGAGAT	ATGTGTGTGGCCTTGCTGTGGCCTTGTTTGGGTACTGCATGCATTTGAATTAGCATCCTTTGTTTTTGTTTCAGCAGGTACTGCATGCAAATTATGCTAT	cat7	KMAC-designed opening ESC	Y	ATGTGTGT:-5.2,GTGTGGCCTTGCT:-5.8,TGCTGTG:-16.6,TGTGGCCTT:-17.8,CCTTGTTTGGGT:-6.5,GGGTACTGCA:-8.0,TGCATGCAT:-6.5,GCATTTGAAT:-7.8,GAATTAGCATC:-5.5,CATCCTTTGTT:-5.3,TGTTTTTGT:-6.2,TTGTTTCAGC:-5.6,CAGCAGGTA:-23.9,GGTACTGCATG:-7.5,CATGCA:-28.4,TGCAAATTA:-8.7,ATTATGCTAT:-7.1	1201	739	1149	3012	1380	1707	882	1326	4901	3684	3443	6278	2996	3596
ATCGAAAGGATGGGAGTACTAAGCTCACTAGGGGGTTCTTATTGTTCTGTCACTCTATTGTTTTGTTGGAGTCAGCAGGTTTGAACCTGCTGACTCAGTGGGAAGTCCAACAAGGCCACACCCACGTCAGCACGGACAAAGTACTGAGAT	CACTAGGGGGTTCTTATTGTTCTGTCACTCTATTGTTTTGTTGGAGTCAGCAGGTTTGAACCTGCTGACTCAGTGGGAAGTCCAACAAGGCCACACCCAC	cat7	KMAC-designed opening ESC	Y	CACTAGGGGG:-6.5,GGGGTTCT:-6.3,TTCTTAT:-8.6,TTATTGTTC:-5.8,GTTCTGTCAC:-5.4,TCACTCTATTGTT:-6.3,TGTTTTGTTG:-7.1,GTTGGAGT:-6.4,GAGTCAGCA:-6.3,AGCAGGTT:-5.5,GGTTTGAA:-7.0,TGAACCTG:-6.8,CCTGCTG:-39.2,GCTGACTCA:-5.3,CTCAGTGGGA:-10.2,GGGAAGTCCA:-5.5,TCCAACAAGG:-13.8,AAGGCCACACCC:-7.6,ACCCACAT:-6.9	881	541	726	665	578	620	1160	2529	3975	3051	2141	2683	4245	4335
ATCGAAAGGATGGGAGTACTAAGCTCTATTGTTCAAATGCTGTGTGGCTCTATTAGGAGGTAGCAAGGCCACACCCACTCCAACAAGGCCACAGCAGCTGGTTTCTTATTCTAATGCTAGTAGAAGTCAGCACGGACAAAGTACTGAGAT	CTATTGTTCAAATGCTGTGTGGCTCTATTAGGAGGTAGCAAGGCCACACCCACTCCAACAAGGCCACAGCAGCTGGTTTCTTATTCTAATGCTAGTAGAA	cat7	KMAC-designed opening ESC	Y	CTATTGTTCA:-5.5,TTCAAATGC:-8.0,ATGCTGTG:-5.2,TGTGTGGCTC:-5.5,GCTCTATT:-6.8,TATTAGGAGGT:-5.2,AGGTAGCA:-20.2,AGCAAGGCCACA:-6.3,CACACCCACTC:-6.1,ACTCCAAC:-6.4,CAACAAGGCCACA:-12.0,CACAGCAG:-10.0,GCAGCTGGTT:-6.9,GGTTTCT:-6.2,TTCTTAT:-8.6,TTATT:-10.8,TATTCT:-8.6,TTCTAATG:-6.7,AATGCTAGT:-6.3,TAGTAGA:-6.0,TAGAACAAA:-5.2	314	173	634	957	359	353	432	464	2682	2306	3880	2976	1162	1651
ATCGAAAGGATGGGAGTACTAAGCTTGCCTCAGCAGGTACTTTATTTGTAACTCCAGCTGACTCATTCATGTTTTTCACTGTCAATTTGCAGTGCCCTCTTCTAATTATTCAAATGCAAAAGAGGGTCAGCACGGACAAAGTACTGAGAT	TGCCTCAGCAGGTACTTTATTTGTAACTCCAGCTGACTCATTCATGTTTTTCACTGTCAATTTGCAGTGCCCTCTTCTAATTATTCAAATGCAAAAGAGG	cat7	KMAC-designed opening ESC	Y	TGCCTCAG:-7.6,TCAGCAGGT:-24.9,AGGTACTTTAT:-7.3,TTATTT:-5.1,ATTTGTA:-5.3,TGTAACTCCA:-5.8,TCCAGCTG:-6.4,GCTGACTCATT:-5.2,CATTC:-17.8,ATTCATGTTT:-7.5,GTTTTTCAC:-5.8,TCACTGT:-7.0,CTGTCAATT:-10.5,AATTTGCA:-9.4,TGCAGTGCC:-12.0,TGCCCTCTTCT:-20.8,TTCTAAT:-11.3,TAATTA:-15.2,ATTATTC:-7.2,ATTCAAATGCA:-6.0,TGCAAA:-20.4,CAAAAGA:-5.2,AAGAGGGCAT:-9.1	120	164	49	300	433	405	472	754	847	946	276	505	2178	2384
ATCGAAAGGATGGGAGTACTAAGCTTGTTTTTGTTTGAAGCAGGCTGAACAATTGAATAAAGTACAAAATACATGCTGTGGCCTTGTTGCAAATTAGCATCACCTGCTTGAATAAGCCAGCTGCAGTCAGCACGGACAAAGTACTGAGAT	TGTTTTTGTTTGAAGCAGGCTGAACAATTGAATAAAGTACAAAATACATGCTGTGGCCTTGTTGCAAATTAGCATCACCTGCTTGAATAAGCCAGCTGCA	cat7	KMAC-designed opening ESC	Y	TGTTTTTGTT:-8.1,TGTTTGAA:-6.0,TGAAGCAGGCT:-6.5,GGCTGAACAAT:-5.5,CAATTGAAT:-5.5,GAATAAAGTA:-6.8,AGTACAAA:-5.8,CAAAATAC:-6.5,ATACATGC:-5.2,ATGCTGTG:-5.2,TGTGGCCTTGTTG:-12.0,GTTGCAAATT:-5.8,AATTAGCATCA:-7.6,ATCACCT:-6.5,ACCTGCTTGAA:-6.3,TGAATAAG:-7.1,TAAGCCAG:-5.1,CCAGCTGCAG:-7.4	1037	617	390	975	799	867	974	1520	1342	1146	1132	1915	429	603
ATCGAAAGGATGGGAGTACTAAGCTTAACTTGCTTCCCCAAAACAAAAACAACAAAACAAAACAAAAACAACAAAACAATAGACTAGCATCAGATGGCTCAGCAGGTACTGCATGCAGTACAAAGGTCAGCACGGACAAAGTACTGAGAT	TAACTTGCTTCCCCAAAACAAAAACAACAAAACAAAACAAAAACAACAAAACAATAGACTAGCATCAGATGGCTCAGCAGGTACTGCATGCAGTACAAAG	cat7	KMAC-designed opening ESC	Y	TAACTTG:-8.2,CTTGCTTC:-5.8,CTTCCCCAAA:-6.8,CAAAACAAAAAC:-5.3,AAACAACAAAACAA:-5.2,ACAAAACAAAAACA:-5.5,AACAACAAAACAA:-5.2,ACAATAGACT:-12.4,GACTAGCAT:-5.4,GCATCAGAT:-7.4,AGATGGCTCAG:-6.5,TCAGCAGGTA:-21.3,GGTACTGCATG:-7.5,CATGCAGTA:-9.7,AGTACAAA:-5.8,CAAAGCAAG:-9.1	116	107	210	175	939	1465	666	1197	339	76	605	239	756	577
ATCGAAAGGATGGGAGTACTAAGCTACACAGTGTGGCCTTGCAAATTAGTGGCCTTGTTTTGTTGTTTTGTTGTTTTTCAAATGCAAAAACAGAAGAGGGTGTAGGTGTGGTCTTGCTAATGTAAGTCAGCACGGACAAAGTACTGAGAT	ACACAGTGTGGCCTTGCAAATTAGTGGCCTTGTTTTGTTGTTTTGTTGTTTTTCAAATGCAAAAACAGAAGAGGGTGTAGGTGTGGTCTTGCTAATGTAA	cat7	KMAC-designed opening ESC	Y	ACACAGTGT:-5.4,GTGTGGCCTTGC:-5.8,TTGCAAATTAG:-8.9,TTAGTGGC:-5.4,TGGCCTTGTT:-16.4,TGTTTTGTTGT:-6.3,TTGTTTTGTTGTTT:-5.2,GTTTTTCAA:-5.7,TCAAATGCAAA:-6.3,CAAAAACAGA:-5.5,CAGAAGAGGG:-34.9,AGGGTGTAG:-6.2,GTAGGTGT:-6.6,GTGTGGTCTTG:-5.2,CTTGCTAA:-5.1,CTAATGT:-6.3,ATGTAAA:-17.6	576	737	642	1082	832	982	1116	1600	2664	3134	1846	1565	4126	4160
ATCGAAAGGATGGGAGTACTAAGCTCTGATGCCCTCCTCCAACAAGACACCTGGCCTCTGTTTTTGGTGGTGGGTACTGCTACCTGCTGAGCCACACACAGACAATAGAACAAAGCAAGGCCACAGTCAGCACGGACAAAGTACTGAGAT	CTGATGCCCTCCTCCAACAAGACACCTGGCCTCTGTTTTTGGTGGTGGGTACTGCTACCTGCTGAGCCACACACAGACAATAGAACAAAGCAAGGCCACA	cat7	KMAC-designed opening ESC	Y	CTGATGCCCTC:-7.8,CCTCCTCCAACAAG:-5.5,CAAGACAC:-6.8,ACACCTGG:-7.9,CTGGCCTCTG:-6.1,TCTGTTTTTGGT:-5.8,TGGTGGTGGG:-6.3,TGGGTACTGC:-5.1,CTGCTAC:-8.7,CTACCTG:-16.3,CCTGCTGAGC:-9.3,GAGCCACACA:-5.5,CACACAG:-10.3,ACAGACAATAGA:-5.2,TAGAACAAA:-5.2,CAAAGCAAG:-9.1,CAAGGCCACACCCA:-5.8	1247	1719	1230	1679	1297	1299	790	1058	1037	839	2132	1832	437	403
ATCGAAAGGATGGGAGTACTAAGCTAGAACCCCTGGTGTGGCCTTGCTGAGAGGGCATCAGAGGCCAGAAGAAACCTGCTGAGAGATGGTTGTGAAGAAACCTGCTGAGAGGCCAGGTGACAGAAGTCAGCACGGACAAAGTACTGAGAT	AGAACCCCTGGTGTGGCCTTGCTGAGAGGGCATCAGAGGCCAGAAGAAACCTGCTGAGAGATGGTTGTGAAGAAACCTGCTGAGAGGCCAGGTGACAGAA	cat7	KMAC-designed opening ESC	Y	AGAACCCCTGGTG:-6.3,GGTGTGGCCTT:-17.7,CCTTGCTG:-8.5,GCTGAGAGG:-10.1,GAGGGCATCAGA:-6.2,CAGAGGCCAGAAGA:-6.5,AAGAAACCTG:-5.6,CCTGCTGAGA:-20.8,GAGAGATG:-5.1,GATGGTTGTGA:-5.6,GTGAAGAAACC:-5.1,AACCTGCT:-5.5,TGCTGAGAGG:-17.0,GAGGCCAG:-10.2,CCAGGTGA:-5.8,GTGACAGAAC:-5.4	968	1018	287	499	1450	1486	459	1036	838	703	718	323	673	674
ATCGAAAGGATGGGAGTACTAAGCTTACTGAGAAAGTAGGCCCAAATGTAAATAAGAATGACCTGGGGTGGCTCATTTGAATAGACTACACCTGGGGTGTGGCAGCAAGGCCACACCTACTTTCTGTCAGCACGGACAAAGTACTGAGAT	TACTGAGAAAGTAGGCCCAAATGTAAATAAGAATGACCTGGGGTGGCTCATTTGAATAGACTACACCTGGGGTGTGGCAGCAAGGCCACACCTACTTTCT	cat7	KMAC-designed opening ESC	Y	TACTGAGA:-5.7,GAGAAAGTAGG:-5.3,TAGGCCCAAA:-5.6,CAAATGTAA:-5.1,GTAAATA:-10.5,AATAA:-10.8,ATAAGAAT:-5.4,GAATGA:-6.9,ATGACCT:-6.1,ACCTGGGGTG:-5.1,GGTGGCTCA:-5.2,CTCATT:-8.7,CATTTGAATA:-5.6,AATAGAC:-15.2,AGACTACACC:-5.5,CACCTGGGGT:-5.1,GGGTGTGGC:-6.9,TGGCAGCAAG:-6.7,CAAGGCCACACCTA:-5.3,CCTACTTTCTC:-5.3	160	273	299	749	411	488	223	651	1289	1474	1258	1726	1645	1761
ATCGAAAGGATGGGAGTACTAAGCTCTCATTAGCAGTGGGTGTGGCCTTGTTGGGCCTAGTCTATTGTTGGAGTGGCTCAGTTGGAGTCAGCACTGGGCACTGCTACCTGCAAAGCACTCAGCAGGTCAGCACGGACAAAGTACTGAGAT	CTCATTAGCAGTGGGTGTGGCCTTGTTGGGCCTAGTCTATTGTTGGAGTGGCTCAGTTGGAGTCAGCACTGGGCACTGCTACCTGCAAAGCACTCAGCAG	cat7	KMAC-designed opening ESC	Y	CTCATTA:-5.5,ATTAGCA:-25.2,AGCAGTG:-8.9,AGTGGGTGTG:-5.5,TGTGGCCTTGTTGG:-11.1,TTGGGCCTAGT:-6.0,TAGTCTATTGTT:-7.8,TGTTGGAGTGG:-5.5,GTGGCTCAG:-5.1,TCAGTTG:-8.3,GTTGGAGT:-6.4,GAGTCAGCACT:-5.2,CACTGGG:-8.6,TGGGCACTGC:-5.9,CTGCTAC:-8.7,CTACCTG:-16.3,CCTGCA:-14.0,TGCAAAGCA:-5.9,AGCACTCAG:-6.4,TCAGCAG:-26.6	1214	1444	841	2590	1099	1068	690	1568	5817	5008	3840	5253	3391	3541
ATCGAAAGGATGGGAGTACTAAGCTAGGCCACACCCACTGACTCATTAGACTAGCCTCCAGGGGAAGTCCATTTGTCAGTGGTGGGTGTAGTCTATTGTTTGTTTTTGTTTTGTTGTTCTGTCAGGTCAGCACGGACAAAGTACTGAGAT	AGGCCACACCCACTGACTCATTAGACTAGCCTCCAGGGGAAGTCCATTTGTCAGTGGTGGGTGTAGTCTATTGTTTGTTTTTGTTTTGTTGTTCTGTCAG	cat7	KMAC-designed opening ESC	Y	AGGCCACAC:-19.2,ACACCCA:-5.2,CCCACTGA:-7.5,CTGACTCATT:-5.8,CATTAGA:-6.3,TAGACTAGC:-7.2,TAGCCTCC:-6.5,CTCCAGGGGA:-7.1,GGGAAGTCCA:-5.5,TCCATTTGTCAG:-5.2,TCAGTGGT:-6.5,TGGTGGGT:-5.2,GGGTGTAGT:-6.3,TAGTCTATTGTT:-7.8,TGTTTGTTTTTG:-6.2,TTTGTTTTGTTGT:-6.0,TTGTTCTGTCA:-6.9,GTCAGAAG:-7.4	1559	1445	2786	4878	1131	1203	1592	2925	9053	7337	10196	11228	6821	7014
ATCGAAAGGATGGGAGTACTAAGCTACAATTTGTCTTTCAAGACCACACACAGGTTTCTAATGCTAGTAGACTTCCCTTGTTTGCATGCAGTACTGCATGTTTGTTCTGTCTCAGCCTGCTAATTGTCAGCACGGACAAAGTACTGAGAT	ACAATTTGTCTTTCAAGACCACACACAGGTTTCTAATGCTAGTAGACTTCCCTTGTTTGCATGCAGTACTGCATGTTTGTTCTGTCTCAGCCTGCTAATT	cat7	KMAC-designed opening ESC	Y	ACAATTTG:-9.1,TTTGTCTTTC:-5.1,TTTCAAGA:-5.9,AAGACCACAC:-5.8,ACACACAG:-5.8,ACAGGTTTCT:-5.5,TTCTAATG:-6.7,AATGCTAGT:-6.3,TAGTAGA:-6.0,TAGACTTCC:-5.5,TTCCCTTGTTT:-6.0,GTTTGCAT:-5.1,GCATGCAGTAC:-6.3,GTACTGCATG:-8.5,CATGTTTGTT:-9.2,TGTTCTGTC:-7.4,TGTCTCAG:-10.8,TCAGCCTGCT:-6.5,TGCTAATTC:-6.0	3009	2122	2075	2663	3980	4036	1629	2659	3448	3797	4392	5462	1829	2230
ATCGAAAGGATGGGAGTACTAAGCTACAGAACAATAGACTAGCCTCCAGGGGAAGTCTAAATGCCTTGTTGGGCCTAGTAGACTTCCCAGCAGGTGGTGGGTGTGGCCTTTGATGTAGCCTTGTTGTCAGCACGGACAAAGTACTGAGAT	ACAGAACAATAGACTAGCCTCCAGGGGAAGTCTAAATGCCTTGTTGGGCCTAGTAGACTTCCCAGCAGGTGGTGGGTGTGGCCTTTGATGTAGCCTTGTT	cat7	KMAC-designed opening ESC	Y	ACAGAACAATAGA:-5.8,TAGACTAGC:-7.2,TAGCCTCC:-6.5,CTCCAGGGGA:-7.1,GGGAAGTCTA:-5.5,TCTAAAT:-5.9,AAATGCCT:-6.2,GCCTTGTTGG:-13.5,TTGGGCCTAGT:-6.0,TAGTAGA:-6.0,TAGACTTCCC:-5.5,TCCCAGCAGGT:-5.2,AGGTGGT:-5.9,TGGTGGGT:-5.2,GGGTGTGGCCTT:-7.6,CCTTTGATGT:-6.0,ATGTAGCCT:-5.1,GCCTTGTTGGA:-13.3	717	451	735	1413	933	900	904	1068	4838	4558	3253	2908	5186	5285
ATCGAAAGGATGGGAGTACTAAGCTACAAGGCCACCAGGGGGCACTGCACAGCAGGTTTGGGTGAGCCATCTCTCCAGGGGATTAAATGCCTTGTTGGAGGTGTGGTCTTGCTTTGCAATTTGCAGTCAGCACGGACAAAGTACTGAGAT	ACAAGGCCACCAGGGGGCACTGCACAGCAGGTTTGGGTGAGCCATCTCTCCAGGGGATTAAATGCCTTGTTGGAGGTGTGGTCTTGCTTTGCAATTTGCA	cat7	KMAC-designed opening ESC	Y	ACAAGGCCAC:-15.1,CCACCAGGG:-5.4,AGGGGGCA:-6.7,GGCACTGCAC:-6.3,GCACAGCAGG:-6.7,CAGGTTT:-8.9,GTTTGGGTGAG:-5.5,TGAGCCATC:-8.6,CATCTCTCCA:-7.3,TCCAGGGGAT:-7.6,GGATTAAA:-5.7,TAAAT:-41.6,AAATGCCT:-6.2,GCCTTGTTGGAGG:-7.2,GAGGTGT:-6.0,GTGTGGTCTTG:-5.2,CTTGCTTTG:-9.1,TTTGCAATT:-7.4,AATTTGCA:-9.4	820	746	158	561	1786	1411	1603	1780	3444	2780	2346	5224	6113	6847
ATCGAAAGGATGGGAGTACTAAGCTACACAATGGCTGAACAAAACAAAAACAAACAATAGAGAAGACCACACCCAAACAAGCAGCTGGTTTCTTCACATCAAAGGCCACACAGAGGGCACAGCAGGTCAGCACGGACAAAGTACTGAGAT	ACACAATGGCTGAACAAAACAAAAACAAACAATAGAGAAGACCACACCCAAACAAGCAGCTGGTTTCTTCACATCAAAGGCCACACAGAGGGCACAGCAG	cat7	KMAC-designed opening ESC	Y	ACACAATGGC:-5.8,TGGCTGAACA:-6.0,AACAAAACAAA:-7.0,CAAAAACAAACA:-6.2,AACAATAGA:-23.4,TAGAGAAGA:-5.1,AAGACCACAC:-5.8,ACACCCA:-5.2,CCCAAACAAG:-7.2,CAAGCAG:-9.1,GCAGCTGGTT:-6.9,GGTTTCTTCAC:-5.1,TCACAT:-7.0,ACATCAAAGG:-6.0,AAGGCCACAC:-17.5,ACACAGAG:-5.5,AGAGGGCAC:-9.9,GCACAGCAGG:-6.7	170	116	304	447	297	201	471	878	665	797	654	692	2214	2001
ATCGAAAGGATGGGAGTACTAAGCTGTTAAATTAGCATGCAGTGCTGCTTCTGGCCTAGTGAAGAAACCCCTGGTTGTGAAAAACAAATTGTTTTGTTGGAGTGGCCTTGCTTCTGGCCTCTTCTGTCAGCACGGACAAAGTACTGAGAT	GTTAAATTAGCATGCAGTGCTGCTTCTGGCCTAGTGAAGAAACCCCTGGTTGTGAAAAACAAATTGTTTTGTTGGAGTGGCCTTGCTTCTGGCCTCTTCT	cat7	KMAC-designed opening ESC	Y	GTTAAAT:-5.8,AAATT:-7.0,AATTAGCAT:-11.8,GCATGCAGTGC:-5.8,GTGCTGCTTC:-5.2,CTTCTGGCCT:-22.6,GCCTAGTGA:-11.2,GTGAAGAAACC:-5.1,AACCCCTGGT:-7.6,TGGTTGTGA:-5.1,GTGAAAAAC:-5.8,AAACAAATTGT:-5.2,TTGTTTTGTTG:-6.3,GTTGGAGTGG:-5.5,GTGGCCTTG:-17.2,CTTGCTTC:-5.8,CTTCTGGCCTC:-18.1,CCTCTTCTGG:-32.1	1306	894	826	1014	1827	2015	1604	2570	2910	3029	968	3359	2029	2359
ATCGAAAGGATGGGAGTACTAAGCTATTGTTCTGCCACACCCACCCTATTCTAATGAGTCAGACTTAGCATGTATTTTGGGGAAGGCTCCACCCTAGGCCCAAAGCAAGCCCACCAGGGAGTGGCGTCAGCACGGACAAAGTACTGAGAT	ATTGTTCTGCCACACCCACCCTATTCTAATGAGTCAGACTTAGCATGTATTTTGGGGAAGGCTCCACCCTAGGCCCAAAGCAAGCCCACCAGGGAGTGGC	cat7	KMAC-designed opening ESC	Y	ATTGTTCTGCCA:-6.5,GCCACACCCAC:-5.5,CCACCCTA:-6.9,CCTATTC:-10.9,ATTCTA:-5.2,TCTAATG:-6.3,AATGAGTCAG:-5.8,TCAGAC:-6.5,AGACTTAG:-5.7,TTAGCAT:-25.6,GCATGTAT:-5.2,GTATTTTG:-6.5,TTTGGGGAAG:-6.8,GAAGGCTCCAC:-7.7,CCACCCTAGG:-6.7,TAGGCCCAAAG:-5.2,AAAGCAAGC:-6.1,AAGCCCAC:-5.2,CCACCAGGG:-5.4,AGGGAGTGG:-5.2,GTGGCTCAGT:-6.1	121	253	196	452	379	347	550	909	1613	1459	1132	1380	1613	2117
ATCGAAAGGATGGGAGTACTAAGCTAATAGCATCAAAACAGGACGCACAGCAGGTGATGGTTGTGGCCTTGCTACCTGCAGCTGAGAGGCCAGAAGAGGGCGTAAGTAGTCTATTGTTCTGCCACGTCAGCACGGACAAAGTACTGAGAT	AATAGCATCAAAACAGGACGCACAGCAGGTGATGGTTGTGGCCTTGCTACCTGCAGCTGAGAGGCCAGAAGAGGGCGTAAGTAGTCTATTGTTCTGCCAC	cat7	KMAC-designed opening ESC	Y	AATAGC:-6.0,TAGCATCAAA:-6.5,CAAAACAGGAC:-5.6,GCACAGCAG:-7.3,GCAGGTGATG:-5.2,GATGGTTGTG:-6.3,TGTGGCCTTGCT:-6.3,TGCTACCTGC:-21.2,CTGCAGCTG:-5.8,GCTGAGAG:-8.6,AGAGGCCAGAAGA:-10.2,AAGAGGGCG:-5.4,TAAGT:-19.1,AAGTAGT:-5.5,TAGTCTATTGTT:-7.8,TGTTCTGCCA:-8.4,GCCACACCC:-6.9	707	655	372	681	2030	1960	1762	1725	1626	1966	1494	2428	1875	2063
ATCGAAAGGATGGGAGTACTAAGCTAATTAGCATCACTCTATTGTTTTTGTTTTGTTTTGTTGTTTGAAAGACTCCACATGTGTGTGGCCTTGTTCTGTCAGAAGAAACCTGCCAGAAGAGGGCAGTCAGCACGGACAAAGTACTGAGAT	AATTAGCATCACTCTATTGTTTTTGTTTTGTTTTGTTGTTTGAAAGACTCCACATGTGTGTGGCCTTGTTCTGTCAGAAGAAACCTGCCAGAAGAGGGCA	cat7	KMAC-designed opening ESC	Y	AATTAGCATCA:-7.6,ATCACTCTA:-5.9,TCTATTGTT:-23.4,TGTTTTTGTTTTGT:-5.5,TTGTTTTGTT:-6.6,TGTTGTTTGA:-8.1,TTGAAAGA:-10.2,AAGACTCCAC:-6.0,CCACATGT:-5.3,ATGTGTGT:-5.2,GTGTGGCCTTGTT:-13.5,TGTTCTGTCA:-7.1,GTCAGAAG:-7.4,GAAGAAACCT:-6.3,ACCTGCCA:-6.2,GCCAGAAGA:-20.8,AAGAGGGCAT:-9.1	819	509	609	1544	969	1089	1325	1252	1867	1640	1725	3031	766	1114
ATCGAAAGGATGGGAGTACTAAGCTACCCCTGGTGCCCTCTCCAGCCCAAAACAGCAGGTTTCAAACAAAAACAAAACAAAGCAAGGCCACACCCCAGGTCAGAACAATAGAGGGCATCACCTGCGTCAGCACGGACAAAGTACTGAGAT	ACCCCTGGTGCCCTCTCCAGCCCAAAACAGCAGGTTTCAAACAAAAACAAAACAAAGCAAGGCCACACCCCAGGTCAGAACAATAGAGGGCATCACCTGC	cat7	KMAC-designed opening ESC	Y	ACCCCTGGT:-9.2,TGGTGCCCTCT:-7.2,CTCTCCAGCCC:-5.1,GCCCAAAACAG:-5.6,ACAGCAGG:-8.8,CAGGTTTC:-8.1,TTTCAA:-8.1,TCAAAC:-5.3,AAACAAAAACA:-5.9,AACAAAACAAA:-7.0,CAAAGCAAG:-9.1,CAAGGCCACACCC:-7.0,ACCCCAGGT:-5.5,AGGTCAGAA:-5.2,AGAACAATAGAG:-8.1,AGAGGGCATC:-8.9,CATCACCTGC:-5.2	407	566	229	614	473	538	359	350	1425	937	305	744	1200	1191
ATCGAAAGGATGGGAGTACTAAGCTACTCCAACAAGGCCACACCTTTGTTTTTGTTCTGCCATTGTGTCTTGGAGACAGGTTTTTCACCTGCTTGTTGGGCACTGCTTCCTGCTGAGACAGGGGTGTCAGCACGGACAAAGTACTGAGAT	ACTCCAACAAGGCCACACCTTTGTTTTTGTTCTGCCATTGTGTCTTGGAGACAGGTTTTTCACCTGCTTGTTGGGCACTGCTTCCTGCTGAGACAGGGGT	cat7	KMAC-designed opening ESC	Y	ACTCCAACAA:-6.2,ACAAGGCCACAC:-14.2,ACACCTT:-5.2,CCTTTGTTT:-7.9,GTTTTTGTT:-7.2,TGTTCTGCCA:-8.4,GCCATTGTGT:-5.8,GTGTCTTGGAGA:-6.2,GAGACAGG:-8.4,CAGGTTT:-8.9,GTTTTTCAC:-5.8,TCACCTGC:-6.5,CTGCTTG:-9.1,CTTGTTGGG:-5.5,TGGGCACTGC:-5.9,CTGCTTCCT:-5.8,TCCTGCTGAG:-5.8,TGAGACAGG:-6.7,CAGGGGTGG:-5.4	1518	1599	3328	4355	1585	1489	1282	1228	6366	5545	8021	9208	4843	5554
ATCGAAAGGATGGGAGTACTAAGCTGTTGCAAAATACATGCATGCATGTCTACAGGTTTCACTAGGCCCAAAGCCCACCCAAACAAAAGCTGGTTCCAGAAGACCACACCCACACCCACTCTATTGTCAGCACGGACAAAGTACTGAGAT	GTTGCAAAATACATGCATGCATGTCTACAGGTTTCACTAGGCCCAAAGCCCACCCAAACAAAAGCTGGTTCCAGAAGACCACACCCACACCCACTCTATT	cat7	KMAC-designed opening ESC	Y	GTTGCAAA:-9.6,CAAAATAC:-6.5,ATACATGCA:-5.2,TGCATGCAT:-6.5,GCATGTCT:-6.4,GTCTACAG:-8.0,ACAGGTTTC:-5.5,TTTCACTAGG:-8.1,TAGGCCCAAAG:-5.2,AAAGCCCACC:-5.2,CACCCAAACAA:-6.5,ACAAAAGCT:-6.0,AGCTGGTTCCAG:-6.5,CCAGAAGA:-16.3,AAGACCACACC:-7.6,CACCCACA:-8.2,CACACCCACT:-5.5,CACTCTATTGTT:-6.3	390	387	549	1115	562	700	297	432	1213	915	1280	743	946	1033
ATCGAAAGGATGGGAGTACTAAGCTCTGGTGCCCTCTCAGCCTGTAGTCTCAGCAGGTAGCCTCCACCCACCTGCCACCTGTCTCAGCAGGTATTTGAAAAACAAGGGAACTGGAGTTAACAATAGTCAGCACGGACAAAGTACTGAGAT	CTGGTGCCCTCTCAGCCTGTAGTCTCAGCAGGTAGCCTCCACCCACCTGCCACCTGTCTCAGCAGGTATTTGAAAAACAAGGGAACTGGAGTTAACAATA	cat7	KMAC-designed opening ESC	Y	CTGGTGCCCTCT:-6.7,CTCTCAGC:-8.6,CAGCCTGTA:-7.6,TGTAGTCTC:-5.8,TCTCAGCAG:-21.7,GCAGGTAG:-22.5,GTAGCCTCC:-7.6,CTCCACCCA:-5.3,CCCACCT:-8.5,ACCTGCCA:-6.2,GCCACCTG:-5.9,CCTGTCTCA:-6.7,CTCAGCAGGT:-24.8,AGGTATTT:-12.3,ATTTGA:-10.2,TTGAAAAAC:-5.7,AAACAAGGGAA:-6.0,GGAACTGGAGT:-6.7,GAGTTA:-7.0,GTTAA:-30.6,TTAACAATAGAC:-8.9	1145	783	418	466	1313	1277	869	1084	1603	1320	1141	1129	1870	1848
ATCGAAAGGATGGGAGTACTAAGCTAATTAGCATTTGCAATAGACTTAGAAAGAGGCCAGAATAGACAGAGGAATAAATGCAAATTTGAATAGACAGAATAGCTGCAGGAAATAGACACTGTGTAGTCAGCACGGACAAAGTACTGAGAT	AATTAGCATTTGCAATAGACTTAGAAAGAGGCCAGAATAGACAGAGGAATAAATGCAAATTTGAATAGACAGAATAGCTGCAGGAAATAGACACTGTGTA	cat7	KMAC-designed opening ESC	Y	AATTAGC:-20.6,TAGCATTT:-5.9,ATTTGCAAT:-8.4,CAATAGACT:-12.2,GACTTAGA:-5.4,TAGAAAG:-8.7,AAAGAG:-7.4,AGAGGCCAGA:-8.0,CAGAATAG:-6.9,ATAGACAGA:-9.6,CAGAGGAATA:-5.6,AATAAA:-7.2,TAAATGC:-8.0,ATGCAAATT:-6.3,AATTTGAA:-6.0,TGAATAG:-9.1,ATAGACAGA:-9.6,CAGAATAG:-6.9,ATAGCT:-5.3,AGCTGCAGG:-9.9,CAGGAAATAG:-5.5,ATAGAC:-12.5,AGACACTG:-5.7,ACTGTGT:-7.6,GTGTAGTCTC:-5.5	42	82	42	184	131	177	354	219	164	283	24	89	505	516
ATCGAAAGGATGGGAGTACTAAGCTCATGAAAGAGGGCACCCTAGGCCCAAATTAGCAACTGAATGAGTCAGTTGCAAGGCCACACCACCAGGGGTTTAACAATAGAAACCTGATTAGACTCATTGTCAGCACGGACAAAGTACTGAGAT	CATGAAAGAGGGCACCCTAGGCCCAAATTAGCAACTGAATGAGTCAGTTGCAAGGCCACACCACCAGGGGTTTAACAATAGAAACCTGATTAGACTCATT	cat7	KMAC-designed opening ESC	Y	CATGAAAGAG:-5.1,AGAGGGCACC:-6.3,CACCCTAGG:-5.4,TAGGCCCAAA:-5.6,CAAATTAGCAA:-8.4,GCAACTGAAT:-5.8,GAATGAGTCAG:-5.2,TCAGTTGC:-7.6,TTGCAA:-6.0,GCAAGGCCACACC:-6.3,CACCACCAGGGGT:-10.0,GGGTTTAA:-5.3,TTAACAATAGA:-10.6,TAGAAA:-9.2,GAAACCT:-11.6,ACCTGATTA:-5.1,ATTAGA:-7.2,TAGACT:-8.4,GACTCATT:-7.8	460	350	134	239	451	516	1810	1758	1718	1151	686	1090	3872	3549
ATCGAAAGGATGGGAGTACTAAGCTTCCAACAAGGCTCCACACCTCCTGCTGAGAGGTGTGGGCTTGCTTTCAAATGCAAATTGTTTCAGCAGGTAGCAGAACAATAGCATAATTTACAGGCTACGTCAGCACGGACAAAGTACTGAGAT	TCCAACAAGGCTCCACACCTCCTGCTGAGAGGTGTGGGCTTGCTTTCAAATGCAAATTGTTTCAGCAGGTAGCAGAACAATAGCATAATTTACAGGCTAC	cat7	KMAC-designed opening ESC	Y	TCCAACAAGG:-13.8,AAGGCTCCAC:-6.1,CCACACCTCC:-10.4,CTCCTGCTG:-8.3,GCTGAGAGG:-10.1,GAGGTGTGG:-9.0,GTGGGCTT:-5.2,GCTTGCTTT:-6.1,CTTTCAA:-9.2,TCAAATG:-8.0,AATGCAAATTGT:-6.3,TTGTTTCAGC:-5.6,CAGCAGGTAGCAG:-16.8,GCAGAACAAT:-8.6,CAATAG:-17.2,ATAGCATAAT:-7.1,TAATTT:-7.4,ATTTACA:-7.9,TACAGGC:-5.8,AGGCTACA:-11.2	420	515	274	1054	622	780	1245	1216	2929	3520	2058	2760	5656	5423
[truncated: 1,074 more rows]

## Sheet: KMAC DeepAccess ESC DE
seq	category	category-name	Used in Hammelman et al. 2020	gc.content	description	dpni.es1.1	dpni.es1.2	dpni.es2.1	dpni.es2.2	dpni.es3.1	dpni.es3.2	dpni.es4.1	dpni.es4.2	dpni.ed1.1	dpni.ed1.2	dpni.ed2.1	dpni.ed2.2	dpnii.es1.1	dpnii.es1.2	dpnii.es2.1	dpnii.es2.2	dpnii.es3.1	dpnii.es3.2	dpnii.es4.1	dpnii.es4.2	dpnii.ed1.1	dpnii.ed1.2	dpnii.ed2.1	dpnii.ed2.2
[truncated: 5,978 more rows]

## Sheet: KMAC DeepAccess Brach+ Fox+
seq	category	category-name	Used in Hammelman et al. 2020	gc.content	description	brachyury.24h-dpni-rep1	brachyury.24h-dpni-rep2	foxa2.24h-dpni-rep1	foxa2.24h-dpni-rep2	brachyury.24h-dpnii-rep1	brachyury.24h-dpnii-rep2	foxa2.24h-dpnii-rep1	foxa2.24h-dpnii-rep2
[truncated: 5,978 more rows]

[truncated: 2 more sheets: KMAC DeepAccess uCd8 Locus, Pioneer ESC DE]
